# Supplementary material for: Highly enantioselective δ-protonation and formal [3 + 3] annulation promoted by N-heterocyclic carbene
Source: Royal Society of Chemistry journal article supplement (doi:10.1039/d2qo00257d), 2022-01-01
Supplement: d2qo00257d1.pdf [file d2qo00257d1.pdf]

## Highly Enantioselective $\delta$ -Protonation and Formal [3+3]

### Annulation Promoted by N-Heterocyclic Carbene

Mengdie Dong,<sup>†</sup> Xiao-Yong Duan,<sup>\*,†,‡</sup> Yanting Li,<sup>†</sup> Binghao, Liu,<sup>†</sup> and Jing Qi<sup>\*,†,‡</sup>

<sup>†</sup>Key Laboratory of Chemical Biology of Hebei Province, College of Chemistry and Environmental Science, and <sup>‡</sup>Key Laboratory of Medicinal Chemistry and Molecular Diagnosis of the Ministry of Education, Hebei University, Baoding 071002, People's Republic of China.

\* Email: [qij13@hbu.edu.cn](mailto:qij13@hbu.edu.cn), [duanxy05@126.com](mailto:duanxy05@126.com).

#### Table of Contents

|                                                               |    |
|---------------------------------------------------------------|----|
| Part 1: General Information.....                              | 2  |
| Part 2: Experimental Section.....                             | 2  |
| Part 3: Characterization of substrates and products.....      | 3  |
| Part 4: Crystal structure of <b>3r</b> .....                  | 20 |
| Part 5: HPLC spectra for all the products.....                | 26 |
| Part 6: <sup>1</sup> HNMR and <sup>13</sup> CNMR spectra..... | 56 |

## Part 1: General Information

Unless otherwise specified, all reactions were carried out under an Argon atmosphere in an oven dried sealed tube, with dry, freshly distilled solvents in anhydrous conditions. THF was distilled from Na and used directly. Reagents were obtained from commercial suppliers and used without further purification unless otherwise noted. The silica gel (200-300 meshes) was used for column chromatography, and the distillation range of petroleum was 60-90 °C. <sup>1</sup>H and <sup>13</sup>C NMR spectra were recorded on Bruker 600 or 400 MHz instrument in CDCl<sub>3</sub>, and spectral data were reported in ppm relative to tetramethylsilane (TMS) as internal standard. The high-resolution mass spectra (HRMS) were measured on a Thermo Q-Exactive spectrometer by ESI, and mass analyzer type is Orbitrap. Data collections for crystal structure were performed at 295.13 K using Cu Kα (λ = 1.54184) radiation on a SuperNova, Dual, Cu at zero, Eos diffractometer. The determination of enantiomeric excess was performed via chiral HPLC analysis Thermo Ulti Mate 3000 HPLC, (RIGOL) L-3000 or Agilent 1260 Infinity II. Optical rotations were measured by Rudolph Research Analytical Autopol-I instrument, cell length = 1 dm, concentrations (c) are quoted in g/100 mL, sodium D line (589 nm). NHC catalysts **A-E** were purchased from Energy Chemical and used as received. Enamines,<sup>1</sup> acetophenone-derived ketamine<sup>2</sup> and cyclic imine<sup>3</sup> were prepared according to the reported literature procedures.

## Part 2: Experimental Section.

### 1. General procedure for the preparation of enal substrates (**1a** as an example)

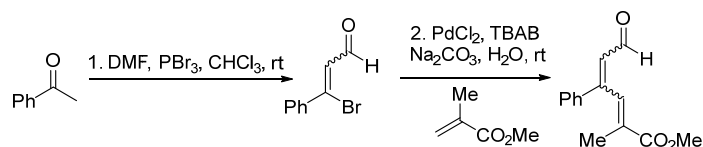

DMF (2 mL, 26 mmol) in 25 mL dry CHCl<sub>3</sub> was added PBr<sub>3</sub> (2.2 mL, 23 mmol) dropwise at 0 °C, and white solid precipitated during the addition process. The suspension was stirred at room temperature for further 30 min, and acetophenone (10 mmol) in 5 mL dry CHCl<sub>3</sub> was added dropwise at 0 °C. The mixture was allowed to warm to room temperature and stirred for about 8 hours. After completely consumption of acetophenone determined by TLC, the mixture was poured into ice water, and NaHCO<sub>3</sub> were added to neutralize to PH≈6. After extraction with CH<sub>2</sub>Cl<sub>2</sub>, the organic layer was washed with brine, dried over anhydrous Na<sub>2</sub>SO<sub>4</sub>, and concentrated under reduced

pressure and afford the crude product of  $\beta$ -bromoenal. To the  $\beta$ -bromoenal was added methyl methacrylate (40 mmol), PdCl<sub>2</sub> (177 mg, 1 mmol), TBAB (3.2 g, 10 mmol), Na<sub>2</sub>CO<sub>3</sub> (4.2 g, 40 mmol) and H<sub>2</sub>O (50 mL). The mixture was stirred for 3 hours, and then quenched with saturated NH<sub>4</sub>Cl solution, extracted with EtOAc. The organic layer was washed with brine, dried over anhydrous Na<sub>2</sub>SO<sub>4</sub>, concentrated under reduced pressure, and purified by silica gel column chromatography to afford the corresponding  $\alpha,\beta,\gamma,\delta$ -diunsaturated enal **1a** in 40% yield, and used for next reaction immediately.

The other  $\alpha,\beta,\gamma,\delta$ -diunsaturated enals (**1b-1f**, **1h-1p**) were prepared according to the standard procedure by using the corresponding  $\beta$ -bromoenals and olefins in 25%-50% yields.

## 2. General procedure for the catalytic reactions (**3a** as an example)

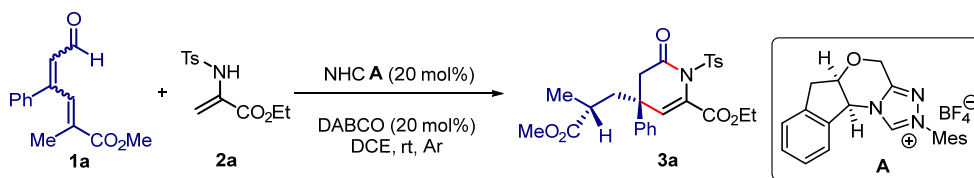

A dry 25 mL Schlenk tube with stir bar was charged with 2-aminoacrylate **2a** (27 mg, 0.1 mmol, 1.0 equiv), NHC **A** (8.4 mg, 0.02 mmol, 20 mol %), DABCO (2.2 mg, 0.02 mmol, 20 mol %). The tube was evacuated, and refilled with argon. Then enals **1a** (23 mg, 0.1 mmol, 1.0 equiv) was added and the mixture was dissolved with newly distilled solvent DCE (1.0 mL). The mixture was stirred at room temperature for 12 hours when the substrate was consumed completely (monitored by TLC). The reaction mixture was concentrated under vacuum and purified by column chromatography on silica gel (petroleum ether/ethyl acetate = 5:1) to afford product **3a** as white solid (38 mg, 76% yield).

### Part 3: Characterization of substrates and products.

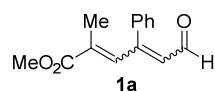

**1a**, Colorless oil, 40% yield. <sup>1</sup>H NMR (400 MHz, CDCl<sub>3</sub>)  $\delta$  9.80 (d,  $J$  = 8.4 Hz, 1H), 7.60-7.59 (m, 1H), 7.52-7.49 (m, 2H), 7.46-7.40 (m, 3H), 6.54 (d,  $J$  = 8.0 Hz, 1H), 3.86 (s, 3H), 1.87 (d,  $J$  = 1.2 Hz, 3H); <sup>13</sup>C NMR (100 MHz, CDCl<sub>3</sub>):  $\delta$  192.0, 167.1, 155.4, 136.2, 135.0, 134.1, 130.8, 128.9, 127.0, 126.7, 52.3, 14.4; HRMS (ESI)  $m/z$ : [M+H]<sup>+</sup> Calcd for C<sub>14</sub>H<sub>15</sub>O<sub>3</sub><sup>+</sup> 231.1016; Found

231.1010.

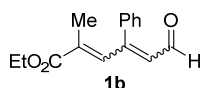

**1b**, Colorless oil, 42% yield.  $^1\text{H NMR}$  (400 MHz,  $\text{CDCl}_3$ )  $\delta$  9.80 (d,  $J = 8.4$  Hz, 1H), 7.58 (s, 1H), 7.51-7.49 (m, 2H), 7.46-7.41 (m, 3H), 6.53 (d,  $J = 8.0$  Hz, 1H), 4.31 (d,  $J = 7.2$  Hz, 2H), 1.86 (d,  $J = 1.2$  Hz, 3H), 1.37 (t,  $J = 7.2$  Hz, 3H);  $^{13}\text{C NMR}$  (100 MHz,  $\text{CDCl}_3$ ):  $\delta$  192.2, 166.7, 155.7, 136.5, 135.4, 133.9, 130.9, 129.1, 127.2, 126.8, 61.4, 14.4, 14.2; **HRMS (ESI) m/z**:  $[\text{M}+\text{Na}]^+$  Calcd for  $\text{C}_{15}\text{H}_{16}\text{NaO}_3^+$  267.0992; Found 267.0995.

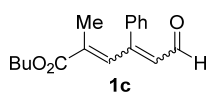

**1c**, Colorless oil, 38% yield.  $^1\text{H NMR}$  (400 MHz,  $\text{CDCl}_3$ )  $\delta$  9.80 (d,  $J = 8.4$  Hz, 1H), 7.58 (s, 1H), 7.51-7.49 (m, 2H), 7.46-7.41 (m, 3H), 6.53 (d,  $J = 8.4$  Hz, 1H), 4.26 (t,  $J = 6.4$  Hz, 2H), 1.86 (d,  $J = 1.2$  Hz, 3H), 1.76-1.68 (m, 2H), 1.48-1.40 (m, 2H), 0.98 (t,  $J = 7.6$  Hz, 3H);  $^{13}\text{C NMR}$  (100 MHz,  $\text{CDCl}_3$ ):  $\delta$  192.2, 166.8, 155.7, 136.4, 135.5, 133.9, 130.9, 127.2, 126.9, 65.3, 30.6, 19.2, 14.5, 13.7; **HRMS (ESI) m/z**:  $[\text{M}+\text{Na}]^+$  Calcd for  $\text{C}_{17}\text{H}_{20}\text{NaO}_3^+$  295.1305; Found 295.1308.

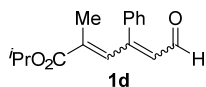

**1d**, Colorless oil, 35% yield.  $^1\text{H NMR}$  (400 MHz,  $\text{CDCl}_3$ )  $\delta$  9.80 (d,  $J = 8.0$  Hz, 1H), 7.56 (s, 1H), 7.52-7.49 (m, 2H), 7.47-7.42 (m, 3H), 6.53 (d,  $J = 8.0$  Hz, 1H), 5.19-5.12 (m, 1H), 1.86 (d,  $J = 1.2$  Hz, 3H), 1.35 (d,  $J = 6.4$  Hz, 6H);  $^{13}\text{C NMR}$  (100 MHz,  $\text{CDCl}_3$ ):  $\delta$  192.3, 166.3, 155.9, 136.5, 135.8, 133.5, 130.9, 129.0, 127.2, 126.8, 68.9, 21.8, 14.4; **HRMS (ESI) m/z**:  $[\text{M}+\text{Na}]^+$  Calcd for  $\text{C}_{16}\text{H}_{18}\text{NaO}_3^+$  281.1148; Found 281.1152.

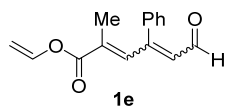

**1e**, Colorless oil, 50% yield.  $^1\text{H NMR}$  (400 MHz,  $\text{CDCl}_3$ )  $\delta$  9.81 (d,  $J = 8.0$  Hz, 1H), 7.71 (s, 1H), 7.51-7.39 (m, 5H), 6.55 (d,  $J = 14.0$  Hz, 1H), 5.04 (d,  $J = 14.0$  Hz, 1H), 4.71 (d,  $J = 8.0$  Hz, 1H), 1.90 (s, 3H);  $^{13}\text{C NMR}$  (100 MHz,  $\text{CDCl}_3$ ):  $\delta$  191.9, 163.7, 155.2, 141.2, 136.1, 135.8, 134.1, 131.0, 129.1, 127.2, 127.0, 98.7, 14.4; **HRMS (ESI) m/z**:  $[\text{M}+\text{Na}]^+$  Calcd for  $\text{C}_{15}\text{H}_{14}\text{NaO}_3^+$  265.0835; Found 265.0838.

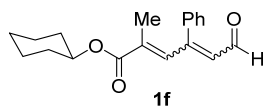

**1f**, Colorless oil, 40% yield.  $^1\text{H NMR}$  (400 MHz,  $\text{CDCl}_3$ )  $\delta$  9.81 (d,  $J = 8.0$  Hz, 1H), 7.57 (s, 1H), 7.52-7.50 (m, 2H), 7.46-7.41 (m, 3H), 6.54 (d,  $J = 8.0$  Hz, 1H), 4.97-4.91 (m, 1H), 1.95-1.90 (m, 2H), 1.86 (s, 3H), 1.76-1.75 (m, 3H), 1.60-1.51 (m, 3H), 1.49-1.39 (m, 2H);  $^{13}\text{C NMR}$  (100 MHz,  $\text{CDCl}_3$ ):  $\delta$  192.3, 166.0, 155.9, 136.4, 135.9, 133.5, 130.8, 129.0, 127.1, 126.8, 73.6, 31.5, 25.3, 23.5, 14.4; **HRMS (ESI) m/z**:  $[\text{M}+\text{Na}]^+$  Calcd for  $\text{C}_{19}\text{H}_{22}\text{NaO}_3^+$  321.1461; Found 321.1464.

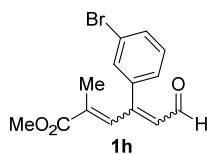

**1h**, Colorless oil, 35% yield.  $^1\text{H NMR}$  (400 MHz,  $\text{CDCl}_3$ )  $\delta$  9.79 (d,  $J = 8.0$  Hz, 1H), 7.59 (d,  $J = 1.6$  Hz, 1H), 7.54 (s, 1H), 7.43-7.40 (m, 2H), 7.32-7.29 (m, 1H), 6.50 (d,  $J = 8.4$  Hz, 1H), 3.87 (s, 3H), 1.86 (d,  $J = 1.2$  Hz, 3H);  $^{13}\text{C NMR}$  (100 MHz,  $\text{CDCl}_3$ ):  $\delta$  191.8, 167.0, 153.8, 138.6, 135.7, 133.7, 133.3, 130.6, 130.1, 127.8, 125.6, 123.2, 52.5, 14.6; **HRMS (ESI) m/z**:  $[\text{M}+\text{H}]^+$  Calcd for  $\text{C}_{14}\text{H}_{14}\text{BrO}_3^+$  309.0121; Found 309.0108.

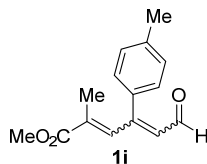

**1i**, Colorless oil, 40% yield.  $^1\text{H NMR}$  (400 MHz,  $\text{CDCl}_3$ )  $\delta$  9.78 (d,  $J = 8.0$  Hz, 1H), 7.54 (s, 1H), 7.40 (d,  $J = 8.8$  Hz, 1H), 7.23 (d,  $J = 8.8$  Hz, 1H), 6.53 (d,  $J = 9.2$  Hz, 1H), 3.87 (s, 3H), 2.40 (s, 3H), 1.86 (d,  $J = 1.2$  Hz, 3H);  $^{13}\text{C NMR}$  (100 MHz,  $\text{CDCl}_3$ ):  $\delta$  192.2, 167.3, 155.6, 141.6, 134.9, 134.4, 133.4, 129.7, 127.1, 125.9, 52.4, 21.4, 14.5; **HRMS (ESI) m/z**:  $[\text{M}+\text{Na}]^+$  Calcd for  $\text{C}_{15}\text{H}_{16}\text{NaO}_3^+$  267.0992; Found 267.0993.

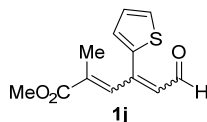

**1j**, Colorless oil, 54% yield.  $^1\text{H NMR}$  (400 MHz,  $\text{CDCl}_3$ )  $\delta$  9.72 (d,  $J = 8.4$  Hz, 1H), 7.58 (s, 1H), 7.51 (d,  $J = 4.8$  Hz, 1H), 7.31 (d,  $J = 4.0$  Hz, 1H), 7.11-7.09 (m, 1H), 6.47 (d,  $J = 8.0$  Hz, 1H), 3.87 (s, 3H), 1.90 (d,  $J = 1.2$  Hz, 3H);  $^{13}\text{C NMR}$  (100 MHz,  $\text{CDCl}_3$ ):  $\delta$  191.5, 167.1, 148.9, 140.7, 135.5, 133.0, 129.8, 128.6, 124.0, 52.5, 14.6; **HRMS (ESI) m/z**:  $[\text{M}+\text{H}]^+$  Calcd for  $\text{C}_{12}\text{H}_{13}\text{O}_3\text{S}^+$

237.0580; Found 237.0574.

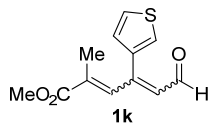

**1k**, Colorless oil, 58% yield. <sup>1</sup>H NMR (400 MHz, CDCl<sub>3</sub>) δ 9.76 (d, *J* = 8.4 Hz, 1H), 7.60 (s, 1H), 7.52-7.518 (m, 1H), 7.42-7.40 (m, 1H), 7.32 (dd, *J* = 4.8, 0.8 Hz, 1H), 6.47 (d, *J* = 8.0 Hz, 1H), 3.86 (s, 3H), 1.88 (d, *J* = 1.2 Hz, 3H); <sup>13</sup>C NMR (100 MHz, CDCl<sub>3</sub>): δ 192.4, 167.2, 149.8, 238.5, 134.8, 133.8, 127.8, 127.5, 125.3, 125.0, 52.5, 14.4; **HRMS (ESI) m/z**: [M+Na]<sup>+</sup> Calcd for C<sub>12</sub>H<sub>12</sub>NaO<sub>3</sub>S<sup>+</sup> 259.0399; Found 259.0403.

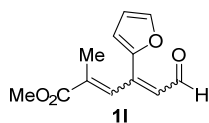

**1l**, Colorless oil, 46% yield. <sup>1</sup>H NMR (400 MHz, CDCl<sub>3</sub>) δ 9.73 (d, *J* = 8.4 Hz, 1H), 7.59 (d, *J* = 1.2 Hz, 1H), 7.48 (s, 1H), 6.68 (d, *J* = 3.2 Hz, 1H), 6.57-6.51 (m, 2H), 6.47 (d, *J* = 8.0 Hz, 1H), 3.86 (s, 3H), 1.89 (d, *J* = 1.2 Hz, 3H); <sup>13</sup>C NMR (100 MHz, CDCl<sub>3</sub>): δ 191.7, 167.2, 150.2, 146.0, 143.2, 135.9, 131.1, 122.3, 115.3, 112.8, 52.4, 14.5; **HRMS (ESI) m/z**: [M+H]<sup>+</sup> Calcd for C<sub>12</sub>H<sub>13</sub>O<sub>4</sub><sup>+</sup> 221.0808; Found 221.0801.

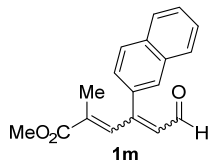

**1m**, Colorless oil, 45% yield. <sup>1</sup>H NMR (400 MHz, CDCl<sub>3</sub>) δ 9.85 (d, *J* = 8.0 Hz, 1H), 7.93-7.85 (m, 4H), 7.71 (s, 1H), 7.65-7.62 (m, 1H), 7.57-7.53 (m, 2H), 6.68 (d, *J* = 8.0 Hz, 1H), 3.90 (s, 3H), 1.89 (d, *J* = 1.2 Hz, 3H); <sup>13</sup>C NMR (100 MHz, CDCl<sub>3</sub>): δ 191.7, 167.2, 150.2, 146.0, 143.2, 135.9, 131.1, 122.3, 115.3, 112.8, 52.4, 14.5; **HRMS (ESI) m/z**: [M+H]<sup>+</sup> Calcd for C<sub>18</sub>H<sub>17</sub>O<sub>3</sub><sup>+</sup> 281.1172; Found 281.1176.

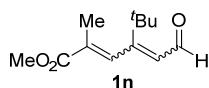

**1n**, Colorless oil, 30% yield. <sup>1</sup>H NMR (400 MHz, CDCl<sub>3</sub>) δ 9.53 (dd, *J* = 8.0, 2.4 Hz, 1H), 7.40 (s, 1H), 6.04 (d, *J* = 8.0 Hz, 1H), 3.83 (d, *J* = 2.8 Hz, 3H), 1.83 (s, 3H), 1.18 (s, 9H); <sup>13</sup>C NMR (100 MHz, CDCl<sub>3</sub>): δ 191.7, 167.2, 150.2, 146.0, 143.2, 135.9, 131.1, 122.3, 115.3, 112.8, 52.4, 14.5; **HRMS (ESI) m/z**: [M+K]<sup>+</sup> Calcd for C<sub>12</sub>H<sub>18</sub>KO<sub>3</sub><sup>+</sup> 249.0888; Found 249.1100

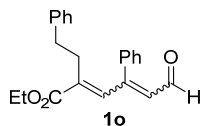

**1o**, Colorless oil, 38% yield.  $^1\text{H NMR}$  (400 MHz,  $\text{CDCl}_3$ )  $\delta$  9.77 (d,  $J = 8.0$  Hz, 1H), 7.61 (s, 1H), 7.45-7.37 (m, 5H), 7.18-7.10 (m, 3H), 6.95 (d,  $J = 7.2$  Hz, 2H), 6.44 (dd,  $J = 8.0, 1.2$  Hz, 1H), 4.34 (q,  $J = 7.2$  Hz, 2H), 2.68-2.64 (m, 2H), 2.55-2.51 (m, 2H), 1.40 (t,  $J = 7.2$  Hz, 3H);  $^{13}\text{C NMR}$  (100 MHz,  $\text{CDCl}_3$ ):  $\delta$  191.9, 166.4, 155.4, 140.7, 138.8, 136.7, 134.5, 130.8, 128.9, 128.3, 127.2, 126.8, 126.1, 61.3, 34.3, 30.7, 14.2; **HRMS (ESI) m/z**:  $[\text{M}+\text{Na}]^+$  Calcd for  $\text{C}_{22}\text{H}_{22}\text{NaO}_3^+$  357.1461; Found 357.1464.

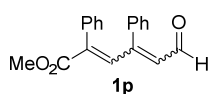

**1p**, Colorless oil, 60% yield.  $^1\text{H NMR}$  (400 MHz,  $\text{CDCl}_3$ )  $\delta$  9.79 (d,  $J = 8.0$  Hz, 1H), 7.86 (s, 1H), 7.50-7.48 (m, 2H), 7.43-7.36 (m, 4H), 7.20-7.18 (m, 2H), 7.11-7.08 (m, 2H), 6.23 (d,  $J = 8.0$  Hz, 1H), 3.86 (s, 3H);  $^{13}\text{C NMR}$  (100 MHz,  $\text{CDCl}_3$ ):  $\delta$  191.4, 166.7, 154.7, 140.0, 136.8, 125.8, 133.5, 130.7, 129.1, 128.9, 128.4, 128.1, 127.2, 126.3, 52.7; **HRMS (ESI) m/z**:  $[\text{M}+\text{Na}]^+$  Calcd for  $\text{C}_{19}\text{H}_{16}\text{NaO}_3^+$  315.0992; Found 315.0997

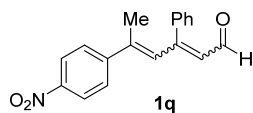

**1q**, Colorless oil, 25% yield.  $^1\text{H NMR}$  (400 MHz,  $\text{CDCl}_3$ ):  $\delta$  9.91 (d,  $J = 7.6$  Hz, 1H), 8.27 (d,  $J = 8.4$  Hz, 1H), 7.72 (d,  $J = 8.8$  Hz, 1H), 7.58-7.56 (m, 2H), 7.48-7.43 (m, 3H), 6.87 (s, 1H), 6.59 (dd,  $J = 8.0, 1.2$  Hz, 1H), 2.11 (d,  $J = 1.2$  Hz, 3H);  $^{13}\text{C NMR}$  (100 MHz,  $\text{CDCl}_3$ ):  $\delta$  192.4, 156.9, 147.7, 147.5, 142.0, 137.3, 130.9, 129.1, 127.3, 127.2, 126.7, 125.7, 123.9, 17.7; **HRMS (ESI) m/z**:  $[\text{M}+\text{Na}]^+$  Calcd for  $\text{C}_{18}\text{H}_{15}\text{NNaO}_3^+$  316.0944; Found 316.0948.

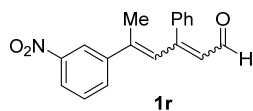

**1r**, Colorless oil, 28% yield.  $^1\text{H NMR}$  (400 MHz,  $\text{CDCl}_3$ )  $\delta$  9.92 (d,  $J = 8.0$  Hz, 1H), 8.42 (s, 1H), 8.23 (d,  $J = 8.4$  Hz, 1H), 7.90 (d,  $J = 8.0$  Hz, 1H), 7.63-7.56 (m, 3H), 7.48-7.45 (m, 3H), 6.86 (s, 1H), 6.59 (d,  $J = 8.0$  Hz, 1H), 2.13 (s, 3H);  $^{13}\text{C NMR}$  (100 MHz,  $\text{CDCl}_3$ ):  $\delta$  192.5, 157.0, 148.5, 143.0, 141.7, 137.5, 131.8, 130.8, 129.6, 129.0, 127.3, 127.2, 124.7, 123.0, 120.8, 17.8; **HRMS (ESI) m/z**:  $[\text{M}+\text{Na}]^+$  Calcd for  $\text{C}_{18}\text{H}_{15}\text{NNaO}_3^+$  316.0944; Found 316.0950.

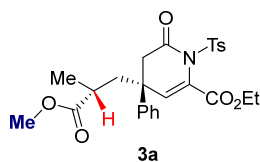

**3a**, Prepared according to the general procedure in 0.1 mmol scale, 76% yield, 38 mg, colorless oil, flash column with a petroleum ether/ethyl acetate eluent (gradient 5:1). **<sup>1</sup>H NMR** (400 MHz, CDCl<sub>3</sub>)  $\delta$  7.71 (d,  $J$  = 7.6 Hz, 2H), 7.29-7.23 (m, 4H), 7.19-7.17 (m, 2H), 7.13 (d,  $J$  = 8.0 Hz, 2H), 6.80 (s, 1H), 4.47-4.34 (m, 2H), 3.52 (s, 3H), 2.94 (d,  $J$  = 15.6 Hz, 1H), 2.67 (d,  $J$  = 16.0 Hz, 1H), 2.40-2.31 (m, 5H), 1.69 (d,  $J$  = 11.6 Hz, 1H), 1.43 (t,  $J$  = 7.6 Hz, 3H), 1.01 (d,  $J$  = 6.0 Hz, 3H). **<sup>13</sup>C NMR** (100 MHz, CDCl<sub>3</sub>):  $\delta$  176.2, 168.7, 163.0, 144.8, 141.1, 134.9, 132.3, 131.4, 129.3, 128.9, 128.87, 126.3, 62.2, 51.8, 44.9, 44.6, 42.1, 35.7, 21.6, 19.5, 13.9. **HRMS (ESI) m/z**: [M+H]<sup>+</sup> Calcd for C<sub>26</sub>H<sub>30</sub>NO<sub>7</sub>S<sup>+</sup> 500.1737; Found 500.1743. **HPLC**: CHIRALPAK OD-H, *n*-hexane/isopropanol = 80/20, flow rate = 1.0 mL/min, UV = 254 nm,  $t_R$  = 21.0 min (major), 26.1 min (minor), 98% ee.

**Optical rotation**:  $[\alpha]_{25}^D = -3$  (c = 1.0 in EtOAc)

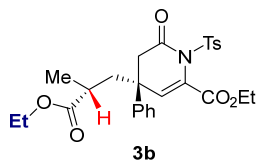

**3b**, Prepared according to the general procedure in 0.1 mmol scale, 60% yield, 31 mg, colorless oil, flash column with a petroleum ether/ethyl acetate eluent (gradient 5:1). **<sup>1</sup>H NMR** (600 MHz, CDCl<sub>3</sub>)  $\delta$  7.65 (d,  $J$  = 7.8 Hz, 2H), 7.25-7.24 (m, 3H), 7.16-7.15 (m, 2H), 7.09 (d,  $J$  = 7.8 Hz, 2H), 6.79 (s, 1H), 6.43 (d,  $J$  = 7.2 Hz, 1H), 4.43-4.34 (m, 2H), 3.93 (q,  $J$  = 7.2 Hz, 2H), 2.93 (d,  $J$  = 15.6 Hz, 1H), 2.65 (d,  $J$  = 16.2 Hz, 1H), 2.37 (s, 3H), 2.29-2.26 (m, 1H), 1.66-1.62 (m, 3H), 1.41 (t,  $J$  = 7.2 Hz, 3H), 1.18 (t,  $J$  = 7.2 Hz, 3H), 0.98 (d,  $J$  = 7.2 Hz, 3H). **<sup>13</sup>C NMR** (150 MHz, CDCl<sub>3</sub>):  $\delta$  175.9, 168.7, 163.1, 144.7, 141.3, 135.0, 132.5, 131.6, 129.3, 129.1, 128.94, 128.9, 127.5, 126.5, 126.4, 62.2, 60.7, 44.8, 42.3, 35.9, 21.6, 19.6, 14.0, 13.95. **HRMS (ESI) m/z**: [M+H]<sup>+</sup> Calcd for C<sub>27</sub>H<sub>32</sub>NO<sub>7</sub>S<sup>+</sup> 514.1894; Found 514.1891. **HPLC**: CHIRALPAK OD-H, *n*-hexane/isopropanol = 80/20, flow rate = 1.0 mL/min, UV = 254 nm,  $t_R$  = 8.9 min (major), 11.0 min (minor), 98% ee. **Optical rotation**:

$[\alpha]_{25}^D = +21$  (c = 1.0 in EtOAc)

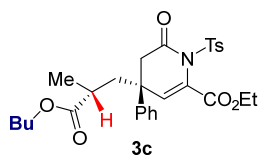



**3c**, Prepared according to the general procedure in 0.1 mmol scale, 60% yield, 32 mg, colorless oil, flash column with a petroleum ether/ethyl acetate eluent (gradient 5:1). **<sup>1</sup>H NMR** (600 MHz, CDCl<sub>3</sub>) δ 7.64 (d, *J* = 7.2 Hz, 2H), 7.25-7.24 (m, 3H), 7.16-7.15 (m, 2H), 7.08 (d, *J* = 8.4 Hz, 2H), 6.78 (s, 1H), 4.41-4.35 (m, 2H), 3.91-3.84 (m, 2H), 2.93 (d, *J* = 16.2 Hz, 1H), 2.65 (d, *J* = 16.2 Hz, 1H), 2.36 (s, 3H), 2.30-2.27 (m, 1H), 1.67-1.63 (m, 2H), 1.55-1.49 (m, 2H), 1.41 (t, *J* = 7.2 Hz, 3H), 1.35-1.29 (m, 2H), 0.98 (d, *J* = 7.2 Hz, 3H), 0.92 (t, *J* = 7.8 Hz, 3H). **<sup>13</sup>C NMR** (150 MHz, CDCl<sub>3</sub>): δ 175.9, 168.7, 163.1, 144.7, 141.3, 135.2, 132.5, 131.5, 129.3, 128.93, 128.92, 127.5, 126.4, 64.6, 62.2, 44.9, 44.8, 42.3, 35.9, 30.4, 21.6, 19.6, 19.1, 14.0, 13.6. **HRMS (ESI) m/z**: [M+H]<sup>+</sup> Calcd for C<sub>29</sub>H<sub>36</sub>NO<sub>7</sub>S<sup>+</sup> 542.2207; Found 542.2210. **HPLC**: CHIRALPAK OD-H, *n*-hexane/isopropanol = 80/20, flow rate = 1.0 mL/min, UV = 254 nm, *t<sub>R</sub>* = 7.7 min (major), 9.3 min (minor), 99% ee.

**Optical rotation**: [α]<sub>25</sub><sup>D</sup> = -29 (c = 1.0 in EtOAc)

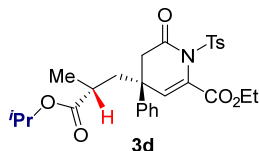

**3d**, Prepared according to the general procedure in 0.1 mmol scale, 55% yield, 29 mg, colorless oil, flash column with a petroleum ether/ethyl acetate eluent (gradient 5:1). **<sup>1</sup>H NMR** (600 MHz, CDCl<sub>3</sub>) δ 7.65 (d, *J* = 7.2 Hz, 2H), 7.25-7.24 (m, 3H), 7.15-7.14 (m, 2H), 7.06 (d, *J* = 8.4 Hz, 2H), 6.80 (s, 1H), 4.81 (hept, *J* = 6.0 Hz, 1H), 4.41-4.35 (m, 2H), 2.93 (d, *J* = 16.2 Hz, 1H), 2.64 (d, *J* = 16.2 Hz, 1H), 2.43-2.31 (m, 4H), 2.23-2.20 (m, 1H), 1.60 (dd, *J* = 15.0, 2.4 Hz, 1H), 1.41 (t, *J* = 7.2 Hz, 3H), 1.17 (dd, *J* = 14.4, 6.0 Hz, 6H), 0.96 (d, *J* = 6.6 Hz, 3H). **<sup>13</sup>C NMR** (150 MHz, CDCl<sub>3</sub>): δ 175.5, 168.7, 163.1, 144.6, 141.4, 135.0, 132.6, 132.2, 129.2, 128.94, 128.90, 127.5, 126.4, 68.1, 62.2, 44.8, 42.4, 42.2, 36.0, 21.6, 19.7, 14.0. **HRMS (ESI) m/z**: [M+H]<sup>+</sup> Calcd for C<sub>28</sub>H<sub>34</sub>NO<sub>7</sub>S<sup>+</sup> 528.2050; Found 528.2058. **HPLC**: CHIRALPAK OD-H, *n*-hexane/isopropanol = 80/20, flow rate = 1.0 mL/min, UV = 254 nm, *t<sub>R</sub>* = 7.5 min (major), 8.9 min (minor), 98% ee. **Optical rotation**: [α]<sub>25</sub><sup>D</sup> = -27 (c = 1.0 in EtOAc)

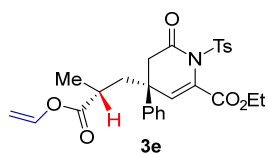

**3e**, Prepared according to the general procedure in 0.1 mmol scale, 33% yield, 17 mg, colorless oil, flash column with a petroleum ether/ethyl acetate eluent (gradient 5:1). **<sup>1</sup>H NMR** (600 MHz, CDCl<sub>3</sub>)

$\delta$  7.65 (d,  $J = 7.8$  Hz, 2H), 7.26-7.23 (m, 3H), 7.15-7.14 (m, 2H), 7.08 (d,  $J = 7.8$  Hz, 2H), 6.97 (dd,  $J = 13.8, 6.6$  Hz, 1H), 6.78 (s, 1H), 4.81 (dd,  $J = 14.4, 1.2$  Hz, 1H), 4.53 (d,  $J = 6.6$  Hz, 1H), 4.42-4.35 (m, 2H), 2.96 (d,  $J = 15.6$  Hz, 1H), 2.66 (d,  $J = 16.2$  Hz, 1H), 2.43-2.36 (m, 5H), 1.73-1.68 (m, 1H), 1.41 (t,  $J = 6.6$  Hz, 3H), 1.02 (d,  $J = 6.6$  Hz, 3H).  $^{13}\text{C NMR}$  (150 MHz,  $\text{CDCl}_3$ ):  $\delta$  172.8, 168.6, 163.1, 144.8, 141.1, 140.9, 135.0, 132.6, 131.5, 129.3, 129.0, 128.9, 127.6, 126.4, 98.1, 62.3, 44.6, 42.2, 35.6, 29.7, 21.6, 19.3, 14.0. **HRMS (ESI) m/z:**  $[\text{M}+\text{H}]^+$  Calcd for  $\text{C}_{27}\text{H}_{30}\text{NO}_7\text{S}^+$  512.1737; Found 512.1742. **HPLC:** CHIRALPAK OD-H, *n*-hexane/isopropanol = 80/20, flow rate = 1.0 mL/min, UV = 254 nm,  $t_{\text{R}} = 9.8$  min (major), 12.1 min (minor), 99% ee. **Optical rotation:**  $[\alpha]_{25}^{\text{D}} = -9$  ( $c = 1.0$  in EtOAc)

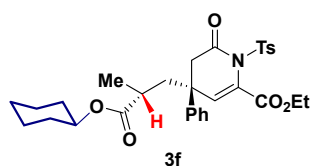

**3f**, Prepared according to the general procedure in 0.1 mmol scale, 55% yield, 31 mg, colorless oil, flash column with a petroleum ether/ethyl acetate eluent (gradient 5:1).  $^1\text{H NMR}$  (600 MHz,  $\text{CDCl}_3$ )  $\delta$  7.65 (d,  $J = 7.2$  Hz, 2H), 7.24-7.22 (m, 3H), 7.16-7.14 (m, 2H), 7.05 (d,  $J = 7.8$  Hz, 2H), 6.81 (s, 1H), 4.59-4.58 (m, 1H), 4.39 (q,  $J = 7.2$  Hz, 2H), 2.93 (d,  $J = 15.6$  Hz, 1H), 2.65 (d,  $J = 16.2$  Hz, 1H), 2.45-2.31 (m, 4H), 2.26-2.20 (m, 1H), 1.78-1.73 (m, 2H), 1.69-1.64 (m, 2H), 1.61 (dd,  $J = 14.4, 2.4$  Hz, 1H), 1.41 (t,  $J = 7.2$  Hz, 3H), 1.38-1.29 (m, 5H), 0.97 (d,  $J = 7.2$  Hz, 3H).  $^{13}\text{C NMR}$  (150 MHz,  $\text{CDCl}_3$ ):  $\delta$  175.4, 168.7, 163.0, 144.6, 141.4, 135.0, 132.6, 131.6, 129.2, 128.9, 128.88, 127.4, 126.4, 72.9, 62.2, 44.9, 44.7, 42.4, 36.0, 31.3, 25.3, 23.6, 21.6, 19.8, 14.0. **HRMS (ESI) m/z:**  $[\text{M}+\text{Na}]^+$  Calcd for  $\text{C}_{31}\text{H}_{37}\text{NNaO}_7\text{S}^+$  590.2183; Found 590.2186. **HPLC:** CHIRALPAK OD-H, *n*-hexane/isopropanol = 80/20, flow rate = 1.0 mL/min, UV = 254 nm,  $t_{\text{R}} = 7.2$  min (major), 8.7 min (minor), 98% ee. **Optical rotation:**  $[\alpha]_{25}^{\text{D}} = -15$  ( $c = 1.0$  in EtOAc)

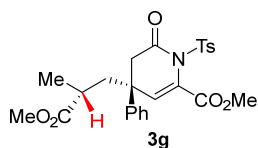

**3g**, Prepared according to the general procedure in 0.1 mmol scale, 75% yield, 36 mg, white solid, m. p. 59.6-61.3 °C, flash column with a petroleum ether/ethyl acetate eluent (gradient 5:1).  $^1\text{H NMR}$  (600 MHz,  $\text{CDCl}_3$ )  $\delta$  7.71 (d,  $J = 7.8$  Hz, 2H), 7.26 (d,  $J = 7.8$  Hz, 3H), 7.17-7.15 (m, 2H), 7.13 (d,  $J = 7.8$  Hz, 2H), 6.79 (s, 1H), 3.92 (s, 3H), 3.50 (s, 3H), 2.92 (d,  $J = 15.6$  Hz, 1H), 2.65 (d,  $J = 16.2$

Hz, 1H), 2.38 (s, 3H), 2.36-2.30 (m, 2H), 1.67 (d,  $J = 11.4$  Hz, 1H), 0.99 (d,  $J = 6.6$  Hz, 3H).  $^{13}\text{C}$  NMR (150 MHz,  $\text{CDCl}_3$ ):  $\delta$  176.2, 168.7, 163.5, 144.9, 141.1, 135.0, 132.1, 131.8, 129.4, 129.0, 128.9, 127.5, 126.3, 52.8, 51.8, 45.0, 44.6, 42.3, 35.8, 21.6, 19.5. **HRMS (ESI) m/z:**  $[\text{M}+\text{Na}]^+$  Calcd for  $\text{C}_{25}\text{H}_{27}\text{NNaO}_7\text{S}^+$  508.1400; Found 508.1399. **HPLC:** CHIRALPAK OD-H, *n*-hexane/isopropanol = 80/20, flow rate = 1.0 mL/min, UV = 254 nm,  $t_{\text{R}} = 14.6$  min (major), 18.1 min (minor), 98% ee. **Optical rotation:**  $[\alpha]_{25}^{\text{D}} = -34$  ( $c = 1.0$  in EtOAc)

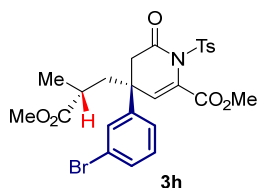

**3h**, Prepared according to the general procedure in 0.1 mmol scale, 43% yield, 24 mg, white solid, m. p.: 72.3-74.2 °C, flash column with a petroleum ether/ethyl acetate eluent (gradient 5:1).  $^1\text{H}$  NMR (400 MHz,  $\text{CDCl}_3$ )  $\delta$  7.64 (d,  $J = 8.0$  Hz, 2H), 7.37 (dt,  $J = 7.2, 1.6$  Hz, 1H), 7.19 (s, 3H), 7.14-7.11 (m, 4H), 6.73 (s, 1H), 3.93 (s, 3H), 3.51 (s, 3H), 2.89 (d,  $J = 15.6$  Hz, 1H), 2.61 (d,  $J = 16.0$  Hz, 1H), 2.40 (s, 3H), 2.34-2.30 (m, 2H), 1.67-1.65 (m, 1H), 1.02 (d,  $J = 6.4$  Hz, 3H).  $^{13}\text{C}$  NMR (100 MHz,  $\text{CDCl}_3$ ):  $\delta$  176.0, 168.1, 163.4, 145.2, 143.7, 134.5, 132.5, 131.1, 130.7, 130.5, 129.3, 129.2, 129.0, 125.3, 123.1, 52.9, 52.0, 44.8, 44.3, 42.1, 35.7, 21.7, 19.6. **HRMS (ESI) m/z:**  $[\text{M}+\text{Na}]^+$  Calcd for  $\text{C}_{25}\text{H}_{26}\text{BrNNaO}_7\text{S}^+$  586.0506; Found 586.0509. **HPLC:** CHIRALPAK OD-H, *n*-hexane/isopropanol = 80/20, flow rate = 1.0 mL/min, UV = 254 nm,  $t_{\text{R}} = 15.3$  min (major), 17.9 min (minor), 99% ee. **Optical rotation:**  $[\alpha]_{25}^{\text{D}} = -15$  ( $c = 1.0$  in EtOAc).

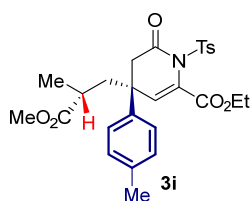

**3i**, Prepared according to the general procedure in 0.1 mmol scale, 56% yield, 29 mg, white solid, m. p.: 52.2-53.6 °C, flash column with a petroleum ether/ethyl acetate eluent (gradient 5:1).  $^1\text{H}$  NMR (400 MHz,  $\text{CDCl}_3$ )  $\delta$  7.68 (d,  $J = 7.6$  Hz, 2H), 7.10 (d,  $J = 8.0$  Hz, 2H), 7.06-7.01 (m, 4H), 6.76 (s, 1H), 4.45-4.32 (m, 2H), 3.51 (s, 3H), 2.89 (d,  $J = 16.0$  Hz, 1H), 2.61 (d,  $J = 16.0$  Hz, 1H), 2.38 (s, 3H), 2.33-2.31 (m, 5H), 1.67-1.60 (m, 1H), 1.41 (t,  $J = 6.8$  Hz, 3H), 0.99 (d,  $J = 6.4$  Hz, 3H).  $^{13}\text{C}$  NMR (100 MHz,  $\text{CDCl}_3$ ):  $\delta$  176.3, 168.8, 163.1, 144.7, 138.0, 137.1, 135.0, 132.2, 131.7, 129.5, 129.4, 128.8, 126.2, 62.2, 51.9, 45.0, 44.8, 41.9, 35.7, 21.6, 21.0, 19.5, 14.0. **HRMS (ESI)**

**m/z:**  $[M+Na]^+$  Calcd for  $C_{27}H_{31}NNaO_7S^+$  536.1713; Found 536.1723. **HPLC:** CHIRALPAK OD-H, *n*-hexane/isopropanol = 80/20, flow rate = 1.0 mL/min, UV = 254 nm,  $t_R$  = 8.9 min (major), 11.3 min (minor), 98% ee. **Optical rotation:**  $[\alpha]_{25}^D = -42$  ( $c = 1.0$  in EtOAc).

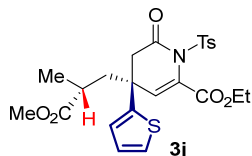

**3j**, Prepared according to the general procedure in 0.1 mmol scale, 62% yield, 31 mg, colorless oil, flash column with a petroleum ether/ethyl acetate eluent (gradient 5:1).  **$^1H$  NMR** (600 MHz,  $CDCl_3$ )  $\delta$  7.90 (d,  $J = 7.8$  Hz, 2H), 7.24-7.22 (m, 3H), 6.90 (m, 1H), 6.84 (d,  $J = 3.0$  Hz, 1H), 6.66 (s, 1H), 4.43-4.34 (m, 2H), 3.65 (s, 3H), 2.85 (d,  $J = 16.2$  Hz, 1H), 2.69 (d,  $J = 16.2$  Hz, 1H), 2.43-2.34 (m, 5H), 1.68 (d,  $J = 13.8$  Hz, 1H), 1.41 (t,  $J = 7.2$  Hz, 3H), 1.04 (d,  $J = 6.6$  Hz, 3H);  **$^{13}C$  NMR** (150 MHz,  $CDCl_3$ ):  $\delta$  176.2, 168.2, 162.9, 145.9, 145.1, 135.3, 132.8, 129.7, 129.2, 129.1, 127.1, 124.9, 124.8, 62.3, 52.0, 47.6, 45.3, 41.0, 36.1, 21.7, 19.4, 14.0. **HRMS (ESI) m/z:**  $[M+H]^+$  Calcd for  $C_{24}H_{28}NO_7S_2^+$  506.1302; Found 506.1307. **HPLC:** CHIRALPAK OD-H, *n*-hexane/isopropanol = 80/20, flow rate = 1.0 mL/min, UV = 254 nm,  $t_R$  = 10.8 min (major), 12.4 min (minor), 99% ee. **Optical rotation:**  $[\alpha]_{25}^D = -17$  ( $c = 1.0$  in EtOAc)

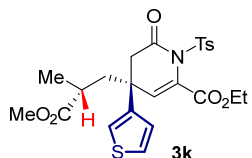

**3k**, Prepared according to the general procedure in 0.1 mmol scale, 70% yield, 35 mg, yellow oil, flash column with a petroleum ether/ethyl acetate eluent (gradient 5:1).  **$^1H$  NMR** (400 MHz,  $CDCl_3$ )  $\delta$  7.83 (d,  $J = 8.0$  Hz, 2H), 7.31 (dd,  $J = 4.8, 2.8$  Hz, 1H), 6.95-6.92 (m, 2H), 6.66 (s, 1H), 4.44-4.31 (m, 2H), 3.57 (s, 3H), 2.85 (d,  $J = 16.0$  Hz, 1H), 2.65 (d,  $J = 16.0$  Hz, 1H), 2.40 (s, 3H), 2.36-2.30 (m, 2H), 1.64-1.58 (m, 1H), 1.40 (t,  $J = 7.2$  Hz, 3H), 1.01 (d,  $J = 6.0$  Hz, 3H).  **$^{13}C$  NMR** (100 MHz,  $CDCl_3$ ):  $\delta$  176.2, 168.7, 163.1, 145.1, 141.9, 135.1, 132.3, 130.3, 129.5, 129.1, 127.0, 125.7, 121.5, 62.2, 51.9, 45.7, 44.2, 40.2, 35.7, 21.7, 19.5, 14.0. **HRMS (ESI) m/z:**  $[M+H]^+$  Calcd for  $C_{24}H_{28}NO_7S_2^+$  506.1302; Found 506.1305. **HPLC:** CHIRALPAK OD-H, *n*-hexane/isopropanol = 80/20, flow rate = 1.0 mL/min, UV = 254 nm,  $t_R$  = 12.1 min (major), 14.8 min (minor), 99% ee. **Optical rotation:**  $[\alpha]_{25}^D = -12$  ( $c = 1.0$  in EtOAc)

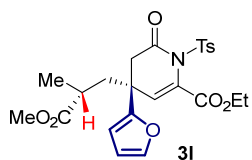

**3l**, Prepared according to the general procedure in 0.1 mmol scale, 61% yield, 30 mg, colorless oil, flash column with a petroleum ether/ethyl acetate eluent (gradient 5:1). **<sup>1</sup>H NMR** (400 MHz, CDCl<sub>3</sub>)  $\delta$  8.00 (d,  $J$  = 8.4 Hz, 1H), 7.34-7.26 (m, 4H), 6.57 (s, 1H), 6.25 (dd,  $J$  = 3.2, 2.0 Hz, 1H), 6.07 (d,  $J$  = 3.2 Hz, 1H), 4.42-4.33 (m, 2H), 3.62 (s, 3H), 2.80 (d,  $J$  = 16.0 Hz, 1H), 2.66 (d,  $J$  = 16.0 Hz, 1H), 2.43 (s, 1H), 2.38-2.30 (m, 2H), 1.71 (dd,  $J$  = 18.8, 8.0 Hz, 1H), 1.40 (d,  $J$  = 7.2 Hz, 3H). **<sup>13</sup>C NMR** (100 MHz, CDCl<sub>3</sub>):  $\delta$  176.0, 168.5, 163.0, 153.2, 145.3, 142.6, 135.2, 132.5, 129.8, 129.1, 127.5, 110.3, 106.9, 62.2, 52.0, 44.2, 41.6, 39.4, 36.0, 21.7, 19.1, 14.0. **HRMS (ESI) m/z**: [M+H]<sup>+</sup> Calcd for C<sub>24</sub>H<sub>28</sub>NO<sub>8</sub>S<sup>+</sup> 490.1530; Found 490.1537. **HPLC**: CHIRALPAK OD-H, *n*-hexane/isopropanol = 80/20, flow rate = 1.0 mL/min, UV = 254 nm,  $t_R$  = 9.6 min (major), 11.5 min (minor), 97% ee. **Optical rotation**:  $[\alpha]_{25}^D$  = -21 (c = 1.0 in EtOAc)

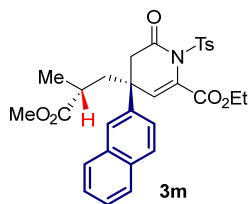

**3m**, Prepared according to the general procedure in 0.1 mmol scale, 72% yield, 40 mg, colorless oil, flash column with a petroleum ether/ethyl acetate eluent (gradient 5:1). **<sup>1</sup>H NMR** (600 MHz, CDCl<sub>3</sub>)  $\delta$  7.82 (d,  $J$  = 7.8 Hz, 1H), 7.76 (d,  $J$  = 9.0 Hz, 1H), 7.60 (d,  $J$  = 7.8 Hz, 1H), 7.53-7.46 (m, 2H), 7.39 (s, 1H), 7.31-7.23 (m, 4H), 6.89 (s, 1H), 6.43 (d,  $J$  = 7.2 Hz, 1H), 4.46-4.34 (m, 2H), 3.24 (s, 3H), 3.11 (d,  $J$  = 16.2 Hz, 1H), 2.69 (d,  $J$  = 15.6 Hz, 1H), 2.45-2.41 (m, 1H), 2.38-2.31 (m, 1H), 2.02 (s, 3H), 1.72 (dd,  $J$  = 14.4, 2.4 Hz, 1H), 1.42 (t,  $J$  = 7.2 Hz, 3H), 0.99 (d,  $J$  = 6.6 Hz, 3H). **<sup>13</sup>C NMR** (150 MHz, CDCl<sub>3</sub>):  $\delta$  176.1, 168.5, 163.1, 144.6, 138.7, 134.4, 133.1, 132.7, 132.6, 131.8, 129.7, 128.9, 128.8, 128.3, 128.1, 127.4, 126.4, 126.38, 125.0, 124.7, 62.3, 51.6, 45.2, 43.9, 42.3, 35.6, 21.3, 19.7, 14.0. **HRMS (ESI) m/z**: [M+H]<sup>+</sup> Calcd for C<sub>30</sub>H<sub>32</sub>NO<sub>7</sub>S<sup>+</sup> 550.1894; Found 550.1896. **HPLC**: CHIRALPAK OD-H, *n*-hexane/isopropanol = 80/20, flow rate = 1.0 mL/min, UV = 254 nm,  $t_R$  = 13.9 min (major), 17.9 min (minor), 99% ee. **Optical rotation**:  $[\alpha]_{25}^D$  = -30 (c = 1.0 in EtOAc)

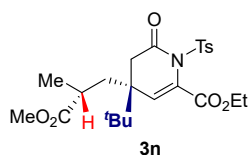

**3n**, Prepared according to the general procedure in 0.1 mmol scale, 30% yield, 14 mg, colorless oil, flash column with a petroleum ether/ethyl acetate eluent (gradient 5:1).  $\delta$  8.10 (d,  $J = 8.4$  Hz, 2H), 7.32 (d,  $J = 8.4$  Hz, 2H), 5.89 (s, 1H), 4.41-4.32 (m, 2H), 3.64 (s, 3H), 2.53 (d,  $J = 17.4$  Hz, 1H), 2.43 (s, 3H), 2.33 (d,  $J = 16.8$  Hz, 1H), 2.08 (dd,  $J = 14.4, 7.8$  Hz, 1H), 1.57-1.56 (m, 1H), 1.87 (t,  $J = 7.2$  Hz, 3H), 1.17 (d,  $J = 7.2$  Hz, 3H), 0.94 (s, 9H);  $^{13}\text{C NMR}$  (150 MHz,  $\text{CDCl}_3$ ):  $\delta$  176.9, 170.2, 163.3, 145.3, 135.7, 132.9, 129.9, 129.1, 126.7, 62.0, 52.1, 44.5, 39.3, 38.6, 37.4, 36.5, 26.0, 21.7, 20.3. **HRMS (ESI) m/z**:  $[\text{M}+\text{Na}]^+$  Calcd for  $\text{C}_{24}\text{H}_{33}\text{NO}_7\text{SNa}^+$  502.1870; Found 502.1874. **HPLC**: CHIRALPAK OD-H, *n*-hexane/isopropanol = 80/20, flow rate = 1.0 mL/min, UV = 254 nm,  $t_{\text{R}} = 9.1$  min (major), 13.4 min (minor), 99% ee. **Optical rotation**:  $[\alpha]_{25}^{\text{D}} = -1$  ( $c = 1.0$  in EtOAc).

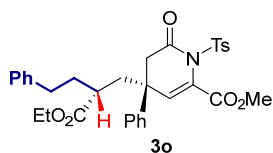

**3o**, Prepared according to the general procedure in 0.1 mmol scale, 52% yield, 31 mg, yellow solid, m.p.: 58.9-60.2 °C, flash column with a petroleum ether/ethyl acetate eluent (gradient 5:1).  $^1\text{H NMR}$  (400 MHz,  $\text{CDCl}_3$ )  $\delta$  7.63 (d,  $J = 8.4$  Hz, 2H), 7.26-7.22 (m, 6H), 7.14-7.06 (m, 6H), 6.73 (s, 1H), 4.42-4.33 (m, 2H), 3.51 (s, 3H), 3.34-3.31 (m, 1H), 2.89-2.66 (m, 2H), 2.52 (d,  $J = 16.0$  Hz, 1H), 2.37 (s, 3H), 2.14 (dd,  $J = 14.4, 5.2$  Hz, 1H), 1.40 (t,  $J = 7.2$  Hz, 3H).  $^{13}\text{C NMR}$  (100 MHz,  $\text{CDCl}_3$ ):  $\delta$  173.4, 168.5, 163.0, 144.7, 141.1, 138.7, 125.0, 132.4, 131.3, 129.2, 129.0(2C), 128.9, 128.87, 127.6(2C), 126.3, 62.2, 52.3, 47.4, 44.5, 42.3(2C), 21.6, 14.0. **HRMS (ESI) m/z**:  $[\text{M}+\text{H}]^+$  Calcd for  $\text{C}_{33}\text{H}_{35}\text{NO}_7\text{SNa}^+$  612.2026; Found 612.2018. **HPLC**: CHIRALPAK OD-H, *n*-hexane/isopropanol = 80/20, flow rate = 1.0 mL/min, UV = 254 nm,  $t_{\text{R}} = 15.7$  min (major), 21.8 min (minor), 99% ee. **Optical rotation**:  $[\alpha]_{25}^{\text{D}} = -41$  ( $c = 1.0$  in EtOAc)

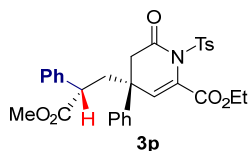

**3p**, Prepared according to the general procedure in 0.1 mmol scale, 73% yield, 41 mg, colorless oil, flash column with a petroleum ether/ethyl acetate eluent (gradient 5:1).  $^1\text{H NMR}$  (400 MHz,  $\text{CDCl}_3$ )

$\delta$  7.69 (d,  $J = 8.0$  Hz, 2H), 7.26-7.19 (m, 6H), 7.14-7.09 (m, 4H), 7.03 (d,  $J = 7.6$  Hz, 2H), 6.76 (s, 1H), 3.96-3.87 (m, 5H), 2.90 (d,  $J = 16.0$  Hz, 1H), 2.63 (d,  $J = 16.0$  Hz, 1H), 2.44-2.39 (m, 2H), 2.36-2.31 (m, 4H), 2.25-2.19 (m, 1H), 1.83-1.7 (m, 2H), 1.54-1.43 (m, 1H), 1.19 (t,  $J = 7.2$  Hz, 3H).  $^{13}\text{C NMR}$  (100 MHz,  $\text{CDCl}_3$ ):  $\delta$  175.1, 168.7, 163.5, 144.9, 141.0, 140.8, 134.9, 132.0, 131.9, 129.3, 129.0, 128.9, 128.4, 128.2, 127.5, 126.3, 126.0, 60.7, 52.8, 44.7, 43.2, 42.2, 41.1, 35.9, 33.1, 21.6, 14.0. **HRMS (ESI) m/z:**  $[\text{M}+\text{H}]^+$  Calcd for  $\text{C}_{31}\text{H}_{32}\text{NO}_7\text{S}^+$  562.1894; Found 562.1898. **HPLC:** CHIRALPAK OD-H, *n*-hexane/isopropanol = 80/20, flow rate = 1.0 mL/min, UV = 254 nm,  $t_{\text{R}} = 19.7$  min (major), 31.2 min (minor), 99% ee. **Optical rotation:**  $[\alpha]_{25}^{\text{D}} = +5$  ( $c = 1.0$  in EtOAc)

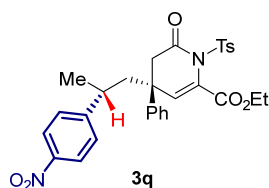

**3q**, Prepared according to the general procedure in 0.1 mmol scale, 70% yield, 39 mg, white solid, m.p.: 68.1-69.7 °C, flash column with a petroleum ether/ethyl acetate eluent (gradient 5:1).  $^1\text{H NMR}$  (400 MHz,  $\text{CDCl}_3$ )  $\delta$  8.07 (d,  $J = 8.8$  Hz, 2H), 7.82 (d,  $J = 8.4$  Hz, 2H), 7.26-7.25 (m, 3H), 7.18 (d,  $J = 8.0$  Hz, 2H), 7.10 (d,  $J = 8.4$  Hz, 4H), 6.32 (s, 1H), 4.32-4.24 (m, 1H), 4.22-4.14 (m, 1H), 2.78-2.66 (m, 3H), 2.44-2.39 (m, 4H), 2.20 (dd,  $J = 14.4, 3.6$  Hz, 1H), 1.27 (t,  $J = 7.6$  Hz, 3H), 1.15 (d,  $J = 6.8$  Hz, 3H);  $^{13}\text{C NMR}$  (100 MHz,  $\text{CDCl}_3$ ):  $\delta$  163.1, 162.7, 153.8, 146.5, 145.0, 141.2, 135.1, 131.6, 131.4, 129.4, 129.1, 128.0, 127.4, 126.0, 123.9, 62.1, 47.7, 47.0, 42.5, 36.6, 24.3, 21.6, 13.8. **HRMS (ESI) m/z:**  $[\text{M}+\text{H}]^+$  Calcd for  $\text{C}_{30}\text{H}_{31}\text{N}_2\text{O}_7\text{S}^+$  563.1846; Found 563.1826. **HPLC:** CHIRALPAK OD-H, *n*-hexane/isopropanol = 80/20, flow rate = 1.0 mL/min, UV = 254 nm,  $t_{\text{R}} = 22.6$  min (minor), 34.7 min (major), 99% ee. **Optical rotation:**  $[\alpha]_{25}^{\text{D}} = +18$  ( $c = 1.0$  in EtOAc)

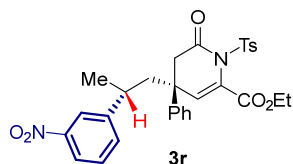

**3r**, Prepared according to the general procedure in 0.1 mmol scale, 53% yield, 30 mg, colorless oil, flash column with a petroleum ether/ethyl acetate eluent (gradient 5:1).  $^1\text{H NMR}$  (600 MHz,  $\text{CDCl}_3$ )  $\delta$  7.98 (d,  $J = 7.8$  Hz, 1H), 7.78 (d,  $J = 7.8$  Hz, 2H), 7.69 (s, 1H), 7.38 (t,  $J = 7.8$  Hz, 1H), 7.31 (d,  $J = 7.8$  Hz, 1H), 7.22-7.19 (m, 3H), 7.16 (d,  $J = 8.4$  Hz, 2H), 7.07-7.06 (m, 2H), 6.39 (s, 1H), 4.33-4.28 (m, 1H), 4.24-4.19 (m, 1H), 2.80 (d,  $J = 15.6$  Hz, 1H), 2.73-2.67 (m, 2H), 2.39-2.35 (m, 4H),

2.17 (dd,  $J = 14.4, 3.6$  Hz, 1H), 1.31 (t,  $J = 7.2$  Hz, 3H), 1.15 (d,  $J = 6.6$  Hz, 3H);  $^{13}\text{C}$  NMR (150 MHz,  $\text{CDCl}_3$ ):  $\delta$  169.0, 162.8, 148.3, 148.1, 145.0, 141.3, 135.2, 133.4, 131.9, 131.5, 129.6, 129.4, 129.1, 129.0, 127.4, 126.0, 122.1, 121.4, 62.1, 48.0, 46.4, 42.5, 36.4, 24.5, 21.6, 13.9; **HRMS (ESI) m/z**:  $[\text{M}+\text{H}]^+$  Calcd for  $\text{C}_{30}\text{H}_{31}\text{N}_2\text{O}_7\text{S}^+$  563.1846; Found 563.1827. **HPLC**: CHIRALPAK OD-H, *n*-hexane/isopropanol = 80/20, flow rate = 1.0 mL/min, UV = 254 nm,  $t_{\text{R}} = 15.5$  min (major), 18.2 min (minor), 99% ee. **Optical rotation**:  $[\alpha]_{25}^{\text{D}} = +1$  ( $c = 1.0$  in EtOAc)

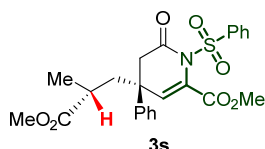

**3s**, Prepared according to the general procedure in 0.1 mmol scale, 76% yield, 36 mg, white solid, m.p.: 112.3-114.6 °C, flash column with a petroleum ether/ethyl acetate eluent (gradient 5:1).  $^1\text{H}$  NMR (600 MHz,  $\text{CDCl}_3$ )  $\delta$  7.83 (d,  $J = 7.8$  Hz, 2H), 7.52 (t,  $J = 7.2$  Hz, 1H), 7.34 (t,  $J = 7.8$  Hz, 2H), 7.27-7.24 (m, 3H), 7.17 (d,  $J = 7.8$  Hz, 2H), 6.81 (s, 1H), 3.93 (s, 3H), 3.50 (s, 3H), 2.93 (d,  $J = 16.2$  Hz, 1H), 2.66 (d,  $J = 16.2$  Hz, 1H), 2.38-2.31 (m, 2H), 1.68 (d,  $J = 13.2$  Hz, 1H), 1.00 (d,  $J = 6.0$  Hz, 3H).  $^{13}\text{C}$  NMR (150 MHz,  $\text{CDCl}_3$ ):  $\delta$  176.2, 168.7, 163.5, 141.0, 138.1, 133.8, 132.0, 129.3, 129.0, 128.4, 127.7, 126.3, 52.9, 51.9, 45.0, 44.7, 35.8, 19.6. **HRMS (ESI) m/z**:  $[\text{M}+\text{Na}]^+$  Calcd for  $\text{C}_{24}\text{H}_{25}\text{NNaO}_7\text{S}^+$  494.1244; Found 494.1245. **HPLC**: CHIRALPAK OD-H, *n*-hexane/isopropanol = 80/20, flow rate = 1.0 mL/min, UV = 254 nm,  $t_{\text{R}} = 15.2$  min (major), 20.4 min (minor), 96% ee. **Optical rotation**:  $[\alpha]_{25}^{\text{D}} = -41$  ( $c = 1.0$  in EtOAc)

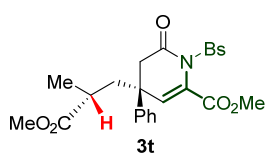

**3t**, Prepared according to the general procedure in 0.1 mmol scale, 42% yield, 23 mg, colorless oil, flash column with a petroleum ether/ethyl acetate eluent (gradient 5:1).  $^1\text{H}$  NMR (600 MHz,  $\text{CDCl}_3$ )  $\delta$  7.63 (d,  $J = 7.2$  Hz, 2H), 7.43 (d,  $J = 7.8$  Hz, 2H), 7.30-7.24 (m, 3H), 7.27-7.24 (m, 3H), 7.13 (d,  $J = 7.2$  Hz, 2H), 6.84 (s, 1H), 3.92 (s, 3H), 3.49 (s, 3H), 2.96 (d,  $J = 16.2$  Hz, 1H), 2.63 (d,  $J = 16.2$  Hz, 1H), 2.40-2.28 (m, 2H), 1.68 (d,  $J = 12.0$  Hz, 1H), 1.01 (d,  $J = 6.6$  Hz, 3H).  $^{13}\text{C}$  NMR (150 MHz,  $\text{CDCl}_3$ ):  $\delta$  176.2, 168.7, 163.3, 141.0, 136.7, 132.7, 131.9, 131.6, 130.7, 130.5, 129.0, 127.7, 126.3, 52.9, 51.9, 44.9, 42.3, 35.8, 19.6. **HRMS (ESI) m/z**:  $[\text{M}+\text{Na}]^+$  Calcd for  $\text{C}_{24}\text{H}_{24}\text{BrNNaO}_7\text{S}^+$  572.0349; Found 572.0353. **HPLC**: CHIRALPAK OD-H, *n*-hexane/isopropanol = 80/20, flow rate



= 1.0 mL/min, UV = 254 nm,  $t_R$  = 13.7 min (major), 16.9 min (minor), 98% ee. **Optical rotation:**  
[ $\alpha$ ]<sub>25</sub><sup>D</sup> = -18 (c = 1.0 in EtOAc)

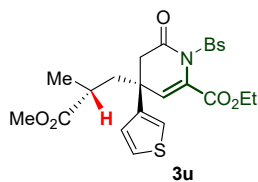

**3u**, Prepared according to the general procedure in 0.1 mmol scale, 64% yield, 36 mg, colorless oil, flash column with a petroleum ether/ethyl acetate eluent (gradient 5:1). **<sup>1</sup>H NMR** (400 MHz, CDCl<sub>3</sub>)  $\delta$  7.78 (d,  $J$  = 8.4 Hz, 2H), 7.56 (d,  $J$  = 8.8 Hz, 2H), 7.32 (dd,  $J$  = 5.2, 2.8 Hz, 1H), 6.95-6.91 (m, 2H), 6.71 (s, 1H), 4.44-4.31 (m, 2H), 3.57 (s, 3H), 2.87 (d,  $J$  = 15.6 Hz, 1H), 2.65 (d,  $J$  = 16.0 Hz, 1H), 2.37-2.30 (m, 2H), 1.67-1.60 (m, 1H), 1.40 (t,  $J$  = 6.8 Hz, 3H), 1.03 (d,  $J$  = 6.4 Hz, 3H). **<sup>13</sup>C NMR** (100 MHz, CDCl<sub>3</sub>):  $\delta$  176.2, 168.8, 162.9, 141.7, 137.0, 132.1, 131.7, 131.0, 130.9, 129.4, 137.1, 125.7, 121.6, 62.4, 52.0, 45.6, 44.3, 40.3, 35.8, 19.5, 14.0. **HRMS (ESI) m/z:** [M+Na]<sup>+</sup> Calcd for C<sub>23</sub>H<sub>24</sub>BrNNaO<sub>7</sub>S<sub>2</sub><sup>+</sup> 592.0070; Found 592.0068. **HPLC:** CHIRALPAK OD-H, *n*-hexane/isopropanol = 80/20, flow rate = 1.0 mL/min, UV = 254 nm,  $t_R$  = 11.0 min (major), 13.7 min (minor), 98% ee. **Optical rotation:** [ $\alpha$ ]<sub>25</sub><sup>D</sup> = -1 (c = 1.0 in EtOAc)

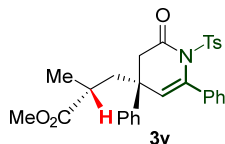

**3u**, Prepared according to the general procedure in 0.1 mmol scale, 33% yield, 17 mg, colorless oil, flash column with a petroleum ether/ethyl acetate eluent (gradient 5:1). **<sup>1</sup>H NMR** (400 MHz, CDCl<sub>3</sub>)  $\delta$  7.53-7.51 (m, 2H), 7.43-7.37 (m, 4H), 7.24-7.23 (m, 6H), 7.00 (d,  $J$  = 8.0 Hz, 2H), 6.03 (s, 1H), 3.48 (s, 3H), 3.03 (d,  $J$  = 16.4 Hz, 1H), 2.72 (d,  $J$  = 16.4 Hz, 1H), 2.37-2.31 (m, 5H), 1.67-1.60 (m, 1H), 0.95 (d,  $J$  = 6.4 Hz, 3H). **<sup>13</sup>C NMR** (100 MHz, CDCl<sub>3</sub>):  $\delta$  176.5, 170.5, 144.2, 142.5, 140.6, 137.6, 135.5, 129.1, 128.8, 128.4, 127.2, 126.7, 126.5, 125.8, 125.5, 51.8, 45.6, 45.4, 35.8, 21.6, 19.6. **HRMS (ESI) m/z:** [M+Na]<sup>+</sup> Calcd for C<sub>29</sub>H<sub>29</sub>NNaO<sub>5</sub>S<sup>+</sup> 526.1659; Found 526.1659. **HPLC:** CHIRALPAK OD-H, *n*-hexane/isopropanol = 80/20, flow rate = 1.0 mL/min, UV = 254 nm,  $t_R$  = 13.9 min (minor), 18.8 min (major), 97% ee. **Optical rotation:** [ $\alpha$ ]<sub>25</sub><sup>D</sup> = -1 (c = 1.0 in EtOAc)

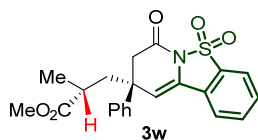

**3v**, Prepared according to the general procedure in 0.1 mmol scale, 75% yield, 31 mg, white solid, m.p. 81.3-82.7°C, flash column with a petroleum ether/ethyl acetate eluent (gradient 5:1). **<sup>1</sup>H NMR** (400 MHz, CDCl<sub>3</sub>) δ 7.84 (d, *J* = 8.0 Hz, 1H), 7.80-7.73 (m, 2H), 7.67-7.63 (m, 1H), 7.39-7.26 (m, 5H), 6.19 (s, 1H), 3.34 (s, 3H), 3.10 (d, *J* = 16.0 Hz, 1H), 2.87 (d, *J* = 16.0 Hz, 1H), 2.67-2.59 (m, 1H), 2.20-2.40 (m, 1H), 1.98 (dd, *J* = 14.4, 2.4 Hz, 1H), 1.14 (d, *J* = 7.2 Hz, 3H). **<sup>13</sup>C NMR** (100 MHz, CDCl<sub>3</sub>): δ 176.5, 165.3, 142.2, 134.1, 132.6, 131.1, 129.3, 129.1, 127.6, 126.5, 125.9, 121.7, 121.6, 109.2, 51.7, 45.0, 44.2, 43.9, 36.4, 19.7. **HRMS (ESI) m/z**: [M+Na]<sup>+</sup> Calcd for C<sub>22</sub>H<sub>21</sub>NNaO<sub>5</sub>S<sup>+</sup> 434.1033; Found 434.1035. **HPLC**: CHIRALPAK OD-H, *n*-hexane/isopropanol = 80/20, flow rate = 1.0 mL/min, UV = 254 nm, *t*<sub>R</sub> = 26.5 min (major), 39.1 min (minor), 92% ee. **Optical rotation**: [α]<sub>25</sub><sup>D</sup> = -18 (c = 1.0 in EtOAc).

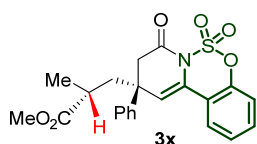

**3w**, Prepared according to the general procedure in 0.1 mmol scale, 89% yield, 38 mg, yellow oil, flash column with a petroleum ether/ethyl acetate eluent (gradient 5:1). **<sup>1</sup>H NMR** (400 MHz, CDCl<sub>3</sub>) δ 7.64 (dd, *J* = 7.6, 1.2 Hz, 1H), 7.47 (td, *J* = 8.0, 1.6 Hz, 1H), 7.38 (t, *J* = 7.6 Hz, 3H), 7.35-7.28 (m, 3H), 7.22 (d, *J* = 8.0 Hz, 1H), 6.21 (s, 1H), 3.39 (s, 3H), 3.10 (d, *J* = 16.0 Hz, 1H), 2.87 (d, *J* = 16.0 Hz, 1H), 2.59 (dd, *J* = 14.4, 9.6 Hz, 1H), 2.47-2.37 (m, 1H), 1.95 (dd, *J* = 14.4, 2.4 Hz, 1H), 1.13 (d, *J* = 7.2 Hz, 3H). **<sup>13</sup>C NMR** (100 MHz, CDCl<sub>3</sub>): δ 176.6, 166.6, 147.3, 141.4, 132.4, 131.5, 129.1, 127.7, 126.0, 120.0, 119.4, 114.9, 51.8, 45.0, 43.8, 42.3, 36.3, 19.7. **HRMS (ESI) m/z**: [M+H]<sup>+</sup> Calcd for C<sub>22</sub>H<sub>21</sub>NO<sub>6</sub>S<sup>+</sup> 428.1162; Found 428.1162. **HPLC**: CHIRALPAK OD-H, *n*-hexane/isopropanol = 80/20, flow rate = 1.0 mL/min, UV = 254 nm, *t*<sub>R</sub> = 15.7 min (minor), 18.5 min (major), 66% ee. **Optical rotation**: [α]<sub>25</sub><sup>D</sup> = +1 (c = 1.0 in EtOAc).

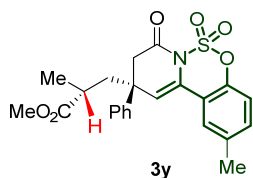

**3y**, Prepared according to the general procedure in 0.1 mmol scale, 96% yield, 42 mg, yellow oil, flash column with a petroleum ether/ethyl acetate eluent (gradient 5:1). **<sup>1</sup>H NMR** (400 MHz, CDCl<sub>3</sub>) δ 7.41-7.24 (m, 8H), 7.09 (d, *J* = 8.0 Hz, 1H), 6.17 (s, 1H), 3.40 (s, 3H), 3.09 (d, *J* = 16.0 Hz, 1H),

2.86 (d,  $J = 16.0$  Hz, 1H), 2.60 (dd,  $J = 14.4, 8.8$  Hz, 1H), 2.46-2.40 (m, 4H), 1.94 (dd,  $J = 14.4, 2.4$  Hz, 1H), 1.13 (d,  $J = 7.2$  Hz, 3H).  $^{13}\text{C NMR}$  (100 MHz,  $\text{CDCl}_3$ ):  $\delta$  176.5, 166.7, 145.2, 141.5, 137.6, 132.5, 132.2, 129.1, 127.6, 126.0, 125.7, 119.7, 119.1, 114.6, 51.7, 44.9, 43.8, 42.2, 36.3, 21.1, 19.7. **HRMS (ESI) m/z:**  $[\text{M}+\text{H}]^+$  Calcd for  $\text{C}_{23}\text{H}_{24}\text{NO}_6\text{S}^+$  442.1319; Found 442.1322. **HPLC:** CHIRALPAK OD-H, *n*-hexane/isopropanol = 80/20, flow rate = 1.0 mL/min, UV = 254 nm,  $t_{\text{R}}$  = 12.4 min (major), 14.3 min (minor), 67% ee. **Optical rotation:**  $[\alpha]_{25}^{\text{D}} = +1$  ( $c = 1.0$  in EtOAc)

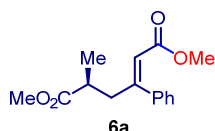

**6a**, Prepared according to the general procedure in 0.1 mmol scale, 46% yield, 12 mg, colorless oil, flash column with a petroleum ether/ethyl acetate eluent (gradient 8:1).  $^1\text{H NMR}$  (400 MHz,  $\text{CDCl}_3$ )  $\delta$  7.42-7.37 (m, 5H), 6.09 (s, 1H), 3.76 (s, 3H), 3.53 (dd,  $J = 12.0, 8.0$  Hz, 1H), 3.47 (s, 3H), 3.30 (dd, 13.2, 6.8 Hz, 1H), 2.61-2.52 (m, 1H), 1.12 (d,  $J = 7.2$  Hz, 3H).  $^{13}\text{C NMR}$  (100 MHz,  $\text{CDCl}_3$ ):  $\delta$  176.0, 166.7, 158.0, 140.6, 129.1, 128.6, 126.9, 119.1, 51.5, 51.2, 38.8, 34.0, 16.4. **HRMS (ESI) m/z:**  $[\text{M}+\text{Na}]^+$  Calcd for  $\text{C}_{15}\text{H}_{18}\text{O}_4\text{Na}^+$  285.1097; Found 285.1096. **HPLC:** CHIRALPAK OD-H, *n*-hexane/isopropanol = 90/10, flow rate = 1.0 mL/min, UV = 254 nm,  $t_{\text{R}}$  = 6.3 min (major), 7.5 min (minor), 16% ee. **Optical rotation:**  $[\alpha]_{25}^{\text{D}} = -13$  ( $c = 1.0$  in EtOAc)

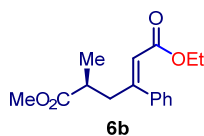

**6b**, Prepared according to the general procedure in 0.1 mmol scale, 35% yield, 10 mg, colorless oil, flash column with a petroleum ether/ethyl acetate eluent (gradient 8:1).  $^1\text{H NMR}$  (400 MHz,  $\text{CDCl}_3$ )  $\delta$  7.42-7.35 (m, 5H), 6.08 (s, 1H), 4.21 (q,  $J = 8.0$  Hz, 2H), 3.53 (dd,  $J = 13.2, 7.6$  Hz, 1H), 3.47 (s, 3H), 3.29 (dd, 13.2, 7.6 Hz, 1H), 2.61-2.52 (m, 1H), 1.31 (t,  $J = 7.2$  Hz, 3H), 1.12 (d,  $J = 6.8$  Hz, 3H).  $^{13}\text{C NMR}$  (100 MHz,  $\text{CDCl}_3$ ):  $\delta$  176.1, 166.3, 157.5, 140.7, 129.0, 128.6, 126.9, 119.7, 60.0, 51.5, 38.9, 33.9, 16.4, 14.3. **HRMS (ESI) m/z:**  $[\text{M}+\text{Na}]^+$  Calcd for  $\text{C}_{16}\text{H}_{20}\text{O}_4\text{Na}^+$  299.1254; Found 299.1253. **HPLC:** CHIRALPAK OD-H, *n*-hexane/isopropanol = 90/10, flow rate = 1.0 mL/min, UV = 254 nm,  $t_{\text{R}}$  = 5.03 min (major), 5.60 min (minor), 21% ee. **Optical rotation:**  $[\alpha]_{25}^{\text{D}} = -5$  ( $c = 1.0$  in EtOAc)

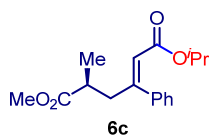

**6c**, Prepared according to the general procedure in 0.1 mmol scale, 33% yield, 10 mg, colorless oil, flash column with a petroleum ether/ethyl acetate eluent (gradient 8:1). **<sup>1</sup>H NMR** (400 MHz, CDCl<sub>3</sub>)  $\delta$  7.42-7.39 (m, 2H), 7.38-7.35 (m, 3H), 6.05 (s, 1H), 5.09 (hept,  $J$  = 6.4 Hz, 1H), 3.52 (dd,  $J$  = 13.2, 8.0 Hz, 1H), 3.47 (s, 3H), 3.28 (dd,  $J$  = 13.2, 7.2 Hz, 1H), 2.57 (sext,  $J$  = 6.8 Hz, 1H), 1.29 (q,  $J$  = 3.2 Hz, 6H), 1.12 (d,  $J$  = 7.2 Hz, 3H); **<sup>13</sup>C NMR** (100 MHz, CDCl<sub>3</sub>):  $\delta$  176.1, 165.8, 157.0, 140.8, 128.9, 128.5, 126.8, 120.2, 67.3, 51.4, 38.8, 33.9, 21.9, 16.4; **HRMS (ESI) m/z**: [M+Na]<sup>+</sup> Calcd for C<sub>17</sub>H<sub>22</sub>O<sub>4</sub>Na<sup>+</sup> 313.1410; Found 313.1408. **HPLC**: CHIRALPAK OD-H, *n*-hexane/isopropanol = 90/10, flow rate = 1.0 mL/min, UV = 254 nm,  $t_R$  = 3.96 min (major), 4.18 min (minor), 33% ee. **Optical rotation**:  $[\alpha]_{25}^D = +9$  (c = 1.0 in EtOAc)

#### Part 4. Crystal structure of 3s.

The product **3s** was obtained by slow diffusion in CH<sub>2</sub>Cl<sub>2</sub>/hexanes at room temperature, colorless crystal was observed, and absolute configuration was determined by X-Ray structure analysis. Supplementary information of the crystal is available under CCDC number 2114888, which could be accessible at free of charge from The Cambridge Crystallographic Data Centre via [www.ccdc.cam.ac.uk](http://www.ccdc.cam.ac.uk). Thermal ellipsoid probability is 30%.

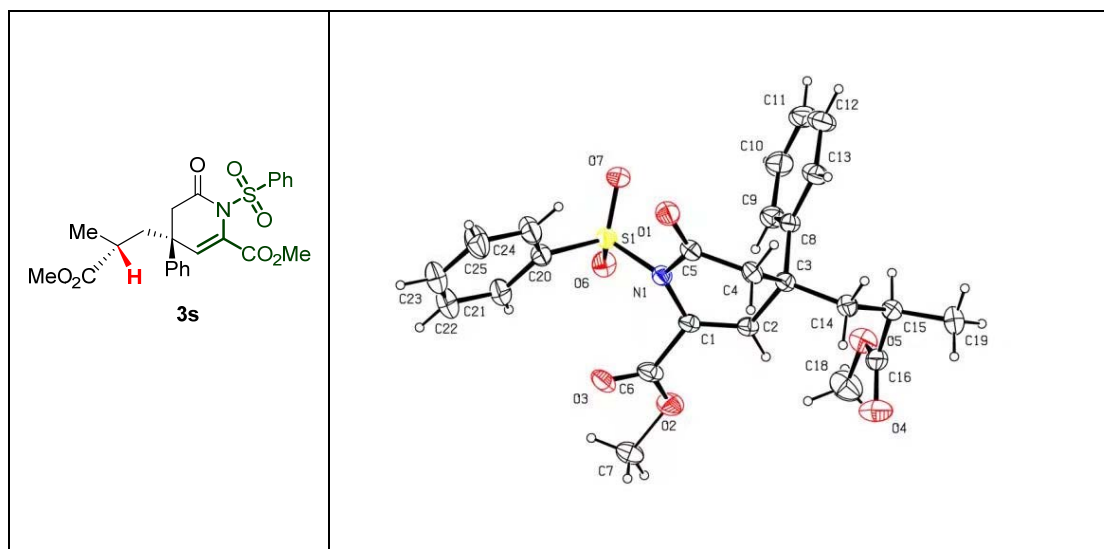

Figure S1. X-ray Crystallographic Analysis of **3s**

Table 1 Crystal data and structure refinement for **3s**.

|                                    |                                                   |
|------------------------------------|---------------------------------------------------|
| Identification code                | dongmd_1208                                       |
| Empirical formula                  | C <sub>24</sub> H <sub>25</sub> NO <sub>7</sub> S |
| Formula weight                     | 471.51                                            |
| Temperature/K                      | 293(2)                                            |
| Crystal system                     | orthorhombic                                      |
| Space group                        | P2 <sub>1</sub> 2 <sub>1</sub> 2 <sub>1</sub>     |
| a/Å                                | 9.32517(16)                                       |
| b/Å                                | 11.40245(17)                                      |
| c/Å                                | 22.4950(4)                                        |
| α/°                                | 90                                                |
| β/°                                | 90                                                |
| γ/°                                | 90                                                |
| Volume/Å <sup>3</sup>              | 2391.89(7)                                        |
| Z                                  | 4                                                 |
| ρ <sub>calc</sub> /cm <sup>3</sup> | 1.309                                             |
| μ/mm <sup>-1</sup>                 | 1.579                                             |
| F(000)                             | 992.0                                             |
| Crystal size/mm <sup>3</sup>       | 0.11 × 0.05 × 0.04                                |

|                                                  |                                                               |
|--------------------------------------------------|---------------------------------------------------------------|
| Radiation                                        | Cu K $\alpha$ ( $\lambda = 1.54184$ )                         |
| 2 $\theta$ range for data collection/ $^{\circ}$ | 7.86 to 151.946                                               |
| Index ranges                                     | $-11 \leq h \leq 8, -7 \leq k \leq 13, -28 \leq l \leq 27$    |
| Reflections collected                            | 8276                                                          |
| Independent reflections                          | 4194 [ $R_{\text{int}} = 0.0257, R_{\text{sigma}} = 0.0343$ ] |
| Data/restraints/parameters                       | 4194/0/311                                                    |
| Goodness-of-fit on $F^2$                         | 0.892                                                         |
| Final R indexes [ $I \geq 2\sigma(I)$ ]          | $R_1 = 0.0438, wR_2 = 0.1154$                                 |
| Final R indexes [all data]                       | $R_1 = 0.0476, wR_2 = 0.1204$                                 |
| Largest diff. peak/hole / e $\text{\AA}^{-3}$    | 0.16/-0.42                                                    |
| Flack parameter                                  | 0.018(11)                                                     |

**Table 2 Fractional Atomic Coordinates ( $\times 10^4$ ) and Equivalent Isotropic Displacement Parameters ( $\text{\AA}^2 \times 10^3$ ) for dongmd\_1208.  $U_{\text{eq}}$  is defined as 1/3 of of the trace of the orthogonalised  $U_{\text{ij}}$  tensor.**

| Atom | $x$        | $y$         | $z$         | $U(\text{eq})$ |
|------|------------|-------------|-------------|----------------|
| S1   | -6991.8(8) | -5423.1(6)  | -1209.2(3)  | 58.3(2)        |
| O1   | -7814(3)   | -7628(2)    | -597.0(11)  | 72.9(6)        |
| O2   | -3092(3)   | -4325(3)    | -423.7(13)  | 85.9(7)        |
| O3   | -3543(3)   | -5694(2)    | -1100.7(12) | 75.8(7)        |
| O4   | -3432(3)   | -4779(3)    | 1651.6(18)  | 104.8(10)      |
| O5   | -5048(3)   | -3418(2)    | 1442.1(13)  | 87.9(8)        |
| O6   | -6323(3)   | -4299.0(17) | -1222.1(11) | 70.6(6)        |
| O7   | -8499(2)   | -5502(2)    | -1149.2(11) | 76.9(7)        |
| N1   | -6245(2)   | -6094.0(19) | -610.8(10)  | 51.1(5)        |
| C1   | -5139(3)   | -5492(2)    | -296.1(12)  | 49.9(6)        |
| C2   | -5190(3)   | -5430(2)    | 293.4(12)   | 51.3(6)        |
| C3   | -6384(3)   | -6026(2)    | 633.0(12)   | 50.6(6)        |
| C4   | -6566(3)   | -7212(2)    | 306.1(13)   | 55.7(7)        |
| C5   | -6957(3)   | -7039(2)    | -333.9(13)  | 54.5(6)        |
| C6   | -3849(3)   | -5158(3)    | -645.7(18)  | 72.2(10)       |
| C8   | -7791(3)   | -5333(2)    | 612.6(12)   | 53.4(6)        |
| C9   | -7854(4)   | -4184(3)    | 417.9(16)   | 69.0(8)        |
| C10  | -9131(5)   | -3559(4)    | 430(2)      | 88.7(12)       |
| C11  | -10350(5)  | -4083(5)    | 630(2)      | 98.6(14)       |
| C12  | -10325(4)  | -5225(5)    | 833(2)      | 93.2(14)       |
| C13  | -9056(4)   | -5839(3)    | 824.1(17)   | 73.2(9)        |

|     |          |           |             |           |
|-----|----------|-----------|-------------|-----------|
| C14 | -5957(4) | -6299(3)  | 1281.9(13)  | 62.2(7)   |
| C15 | -5924(4) | -5259(3)  | 1721.7(14)  | 68.3(8)   |
| C16 | -4663(4) | -4476(3)  | 1607.0(15)  | 69.4(8)   |
| C18 | -3890(6) | -2608(4)  | 1305(3)     | 114.5(17) |
| C19 | -5831(6) | -5730(5)  | 2358.0(16)  | 102.3(15) |
| C20 | -6457(4) | -6224(3)  | -1840.3(13) | 62.2(7)   |
| C21 | -5451(5) | -5743(4)  | -2216.1(16) | 79.6(10)  |
| C22 | -5086(6) | -6343(5)  | -2731.3(18) | 99.9(14)  |
| C23 | -5705(6) | -7398(5)  | -2858.3(19) | 101.1(15) |
| C24 | -7066(5) | -7300(4)  | -1960.7(17) | 87.0(11)  |
| C25 | -6687(7) | -7877(4)  | -2478(2)    | 109.5(17) |
| C7  | -1804(7) | -4122(8)  | -783(4)     | 95(2)     |
| C17 | -2152(9) | -5208(10) | -1337(5)    | 90(3)     |

**Table 3 Anisotropic Displacement Parameters ( $\text{\AA}^2 \times 10^3$ ) for dongmd\_1208. The Anisotropic displacement factor exponent takes the form: -  $2\pi^2[\mathbf{h}^2\mathbf{a}^*2\mathbf{U}_{11}+2\mathbf{hka}^*\mathbf{b}^*\mathbf{U}_{12}+\dots]$ .**

| Atom | $U_{11}$ | $U_{22}$  | $U_{33}$  | $U_{23}$  | $U_{13}$ | $U_{12}$  |
|------|----------|-----------|-----------|-----------|----------|-----------|
| S1   | 53.0(4)  | 66.9(4)   | 54.9(3)   | 3.9(3)    | 2.7(3)   | 13.4(3)   |
| O1   | 69.4(14) | 75.1(12)  | 74.3(13)  | -11.2(11) | 4.9(12)  | -21.2(12) |
| O2   | 61.1(13) | 103.4(18) | 93.1(17)  | 20.9(14)  | 6.2(13)  | -26.7(14) |
| O3   | 59.0(12) | 89.7(14)  | 78.6(15)  | 21.8(12)  | 26.2(12) | 14.6(11)  |
| O4   | 58.1(15) | 113(2)    | 143(3)    | -9(2)     | -9.5(17) | 5.2(15)   |
| O5   | 75.9(17) | 86.9(15)  | 101.0(19) | -4.6(14)  | 8.8(15)  | 0.7(14)   |
| O6   | 84.6(16) | 55.5(10)  | 71.6(13)  | 10.1(9)   | 0.9(12)  | 13.7(10)  |
| O7   | 51.0(11) | 109.2(17) | 70.6(14)  | -5.9(14)  | 1.3(10)  | 18.2(12)  |
| N1   | 48.3(12) | 54.4(11)  | 50.5(11)  | 4.4(9)    | 2.9(10)  | 1.2(9)    |
| C1   | 40.2(12) | 49.1(12)  | 60.4(14)  | 9.0(10)   | 4.3(11)  | -0.2(11)  |
| C2   | 43.7(12) | 50.9(12)  | 59.2(14)  | 3.1(11)   | 0.6(12)  | -3.1(12)  |
| C3   | 46.7(13) | 52.4(12)  | 52.7(14)  | 2.9(11)   | 5.2(11)  | -0.6(11)  |
| C4   | 59.7(16) | 47.7(12)  | 59.8(15)  | 5.7(11)   | 11.9(13) | -4.8(12)  |
| C5   | 51.4(14) | 52.6(12)  | 59.4(14)  | -3.2(11)  | 10.1(13) | -3.0(13)  |
| C6   | 46.1(15) | 82(2)     | 88(2)     | 41.4(19)  | 9.2(17)  | 9.9(15)   |
| C8   | 44.1(13) | 62.2(13)  | 53.9(13)  | -7.1(11)  | 1.0(11)  | -1.9(12)  |
| C9   | 62.3(18) | 66.8(16)  | 78(2)     | 5.4(14)   | 1.4(16)  | 10.0(15)  |
| C10  | 81(3)    | 90(2)     | 95(3)     | 1(2)      | -5(2)    | 28(2)     |
| C11  | 59(2)    | 130(4)    | 106(3)    | -32(3)    | -8(2)    | 32(2)     |
| C12  | 48.5(18) | 125(4)    | 106(3)    | -38(3)    | 12(2)    | -8(2)     |
| C13  | 52.8(16) | 79(2)     | 88(2)     | -17.3(17) | 12.9(17) | -10.5(15) |

|     |          |          |          |           |          |          |
|-----|----------|----------|----------|-----------|----------|----------|
| C14 | 59.6(16) | 71.5(16) | 55.5(15) | 9.3(13)   | 5.0(14)  | -1.0(14) |
| C15 | 53.6(16) | 95(2)    | 56.7(16) | -7.8(15)  | 2.3(14)  | 12.7(17) |
| C16 | 60.1(17) | 87(2)    | 61.2(16) | -19.5(16) | -2.9(14) | 4.4(17)  |
| C18 | 110(4)   | 93(3)    | 141(4)   | -14(3)    | 27(3)    | -20(3)   |
| C19 | 100(3)   | 153(4)   | 53.9(19) | -2(2)     | 12(2)    | 8(3)     |
| C20 | 60.3(17) | 72.7(16) | 53.7(15) | 2.2(13)   | 4.2(13)  | 9.3(15)  |
| C21 | 87(2)    | 90(2)    | 61.4(17) | 6.3(16)   | 15.4(18) | -2(2)    |
| C22 | 115(4)   | 116(3)   | 69(2)    | 7(2)      | 34(2)    | -1(3)    |
| C23 | 123(4)   | 113(3)   | 67(2)    | -12(2)    | 32(2)    | 7(3)     |
| C24 | 93(3)    | 98(2)    | 70(2)    | -16.9(18) | 25(2)    | -17(2)   |
| C25 | 136(4)   | 106(3)   | 87(3)    | -32(2)    | 34(3)    | -18(3)   |
| C7  | 58(3)    | 128(5)   | 99(5)    | 11(4)     | 15(3)    | -39(4)   |
| C17 | 52(5)    | 113(7)   | 106(7)   | 49(6)     | 31(5)    | 4(5)     |

**Table 4 Bond Lengths for dongmd\_1208.**

| Atom | Atom | Length/Å | Atom | Atom | Length/Å |
|------|------|----------|------|------|----------|
| S1   | O6   | 1.426(2) | C3   | C8   | 1.533(4) |
| S1   | O7   | 1.415(2) | C3   | C14  | 1.544(4) |
| S1   | N1   | 1.698(2) | C4   | C5   | 1.498(4) |
| S1   | C20  | 1.760(3) | C8   | C9   | 1.383(4) |
| O1   | C5   | 1.200(4) | C8   | C13  | 1.397(4) |
| O2   | C6   | 1.284(5) | C9   | C10  | 1.388(5) |
| O2   | C7   | 1.466(6) | C10  | C11  | 1.360(7) |
| O3   | C6   | 1.226(5) | C11  | C12  | 1.380(7) |
| O3   | C17  | 1.507(8) | C12  | C13  | 1.375(6) |
| O4   | C16  | 1.203(4) | C14  | C15  | 1.544(5) |
| O5   | C16  | 1.313(5) | C15  | C16  | 1.499(5) |
| O5   | C18  | 1.454(6) | C15  | C19  | 1.531(5) |
| N1   | C1   | 1.427(4) | C20  | C21  | 1.376(5) |
| N1   | C5   | 1.411(4) | C20  | C24  | 1.379(5) |
| C1   | C2   | 1.329(4) | C21  | C22  | 1.388(6) |
| C1   | C6   | 1.487(4) | C22  | C23  | 1.364(7) |
| C2   | C3   | 1.512(4) | C23  | C25  | 1.367(7) |
| C3   | C4   | 1.548(4) | C24  | C25  | 1.383(5) |

**Table 5 Bond Angles for dongmd\_1208.**

| Atom | Atom | Atom | Angle/° | Atom | Atom | Atom | Angle/° |
|------|------|------|---------|------|------|------|---------|
|------|------|------|---------|------|------|------|---------|



|     |    |     |            |     |     |     |          |
|-----|----|-----|------------|-----|-----|-----|----------|
| O6  | S1 | N1  | 103.99(13) | O2  | C6  | C1  | 115.4(3) |
| O6  | S1 | C20 | 109.02(15) | O3  | C6  | O2  | 124.4(3) |
| O7  | S1 | O6  | 119.60(16) | O3  | C6  | C1  | 120.1(3) |
| O7  | S1 | N1  | 107.63(14) | C9  | C8  | C3  | 122.3(3) |
| O7  | S1 | C20 | 109.00(16) | C9  | C8  | C13 | 117.6(3) |
| N1  | S1 | C20 | 106.83(13) | C13 | C8  | C3  | 120.0(3) |
| C6  | O2 | C7  | 110.7(4)   | C8  | C9  | C10 | 121.1(4) |
| C6  | O3 | C17 | 108.1(6)   | C11 | C10 | C9  | 119.9(4) |
| C16 | O5 | C18 | 116.1(3)   | C10 | C11 | C12 | 120.7(4) |
| C1  | N1 | S1  | 118.24(18) | C13 | C12 | C11 | 119.4(4) |
| C5  | N1 | S1  | 120.1(2)   | C12 | C13 | C8  | 121.4(4) |
| C5  | N1 | C1  | 119.2(2)   | C3  | C14 | C15 | 117.1(3) |
| N1  | C1 | C6  | 116.5(3)   | C16 | C15 | C14 | 111.2(3) |
| C2  | C1 | N1  | 119.7(2)   | C16 | C15 | C19 | 109.0(3) |
| C2  | C1 | C6  | 122.9(3)   | C19 | C15 | C14 | 109.3(3) |
| C1  | C2 | C3  | 120.4(3)   | O4  | C16 | O5  | 123.3(4) |
| C2  | C3 | C4  | 103.5(2)   | O4  | C16 | C15 | 124.3(4) |
| C2  | C3 | C8  | 112.5(2)   | O5  | C16 | C15 | 112.4(3) |
| C2  | C3 | C14 | 112.2(2)   | C21 | C20 | S1  | 118.8(3) |
| C8  | C3 | C4  | 110.1(2)   | C21 | C20 | C24 | 121.0(3) |
| C8  | C3 | C14 | 110.7(2)   | C24 | C20 | S1  | 120.2(3) |
| C14 | C3 | C4  | 107.5(2)   | C20 | C21 | C22 | 118.9(4) |
| C5  | C4 | C3  | 111.6(2)   | C23 | C22 | C21 | 120.4(4) |
| O1  | C5 | N1  | 121.5(3)   | C22 | C23 | C25 | 120.3(4) |
| O1  | C5 | C4  | 124.3(3)   | C20 | C24 | C25 | 118.9(4) |
| N1  | C5 | C4  | 114.2(2)   | C23 | C25 | C24 | 120.5(4) |

**Table 6 Hydrogen Atom Coordinates ( $\text{\AA} \times 10^4$ ) and Isotropic Displacement Parameters ( $\text{\AA}^2 \times 10^3$ ) for dongmd\_1208.**

| Atom | <i>x</i>  | <i>y</i> | <i>z</i> | U(eq) |
|------|-----------|----------|----------|-------|
| H2   | -4486.96  | -5016.65 | 498.38   | 62    |
| H4A  | -5676.66  | -7651.29 | 330.55   | 67    |
| H4B  | -7308.23  | -7667.16 | 500.87   | 67    |
| H9   | -7027.29  | -3823.37 | 276.26   | 83    |
| H10  | -9153.63  | -2783.32 | 302.32   | 106   |
| H11  | -11208.19 | -3667.62 | 629.53   | 118   |
| H12  | -11158.73 | -5575.5  | 974.05   | 112   |
| H13  | -9040.36  | -6608.34 | 961.81   | 88    |
| H14A | -5012.35  | -6654.59 | 1277.71  | 75    |

|      |          |          |          |     |
|------|----------|----------|----------|-----|
| H14B | -6620.26 | -6880.12 | 1435.24  | 75  |
| H15  | -6808.81 | -4802.83 | 1678.38  | 82  |
| H18A | -3441.11 | -2836.33 | 938.9    | 172 |
| H18B | -3194.6  | -2624.03 | 1619.81  | 172 |
| H18C | -4268.64 | -1828.86 | 1266.3   | 172 |
| H19A | -6656.7  | -6205.41 | 2440.67  | 153 |
| H19B | -5798.73 | -5084.96 | 2632.02  | 153 |
| H19C | -4978.45 | -6194.6  | 2400.34  | 153 |
| H21  | -5023.76 | -5027.51 | -2126.34 | 96  |
| H22  | -4416.2  | -6024.1  | -2991.38 | 120 |
| H23  | -5456.88 | -7792.84 | -3205.06 | 121 |
| H24  | -7720.8  | -7632.13 | -1698.3  | 104 |
| H25  | -7104.24 | -8595.9  | -2568.27 | 131 |
| H7A  | -2077.23 | -3956.7  | -1185.49 | 142 |
| H7B  | -1208.47 | -4808.68 | -773.84  | 142 |
| H7C  | -1281.91 | -3467.4  | -623.84  | 142 |
| H17A | -1868.51 | -5641.41 | -1682.95 | 135 |
| H17B | -1422.76 | -5275.01 | -1037.17 | 135 |
| H17C | -2278.1  | -4397.33 | -1439.69 | 135 |

**Table 7 Atomic Occupancy for dongmd\_1208.**

| Atom | Occupancy | Atom | Occupancy | Atom | Occupancy |
|------|-----------|------|-----------|------|-----------|
| C7   | 0.6       | H7A  | 0.6       | H7B  | 0.6       |
| H7C  | 0.6       | C17  | 0.4       | H17A | 0.4       |
| H17B | 0.4       | H17C | 0.4       |      |           |

Reference:

- 1) X.-S. Li, L.-L. Zhao, X.-K. Wang, L.-L. Cao, X.-Q. Shi, R. Zhang, J. Qi, *Org. Lett.* **2017**, *19*, 3943–3946.
- 2) Q. Yang, G. Shang, W. Gao, J. Deng, X. Zhang, *Angew. Chem. Int. Ed.* **2006**, *45*, 3832–3835.
- 3) B. Li, J. Chen, Z. Zhang, I. D. Gridnev, W. Zhang, *Angew. Chem. Int. Ed.* **2019**, *58*, 7329–7334.

**Part 5. HPLC spectrum for all the products.**

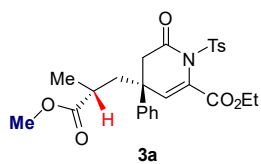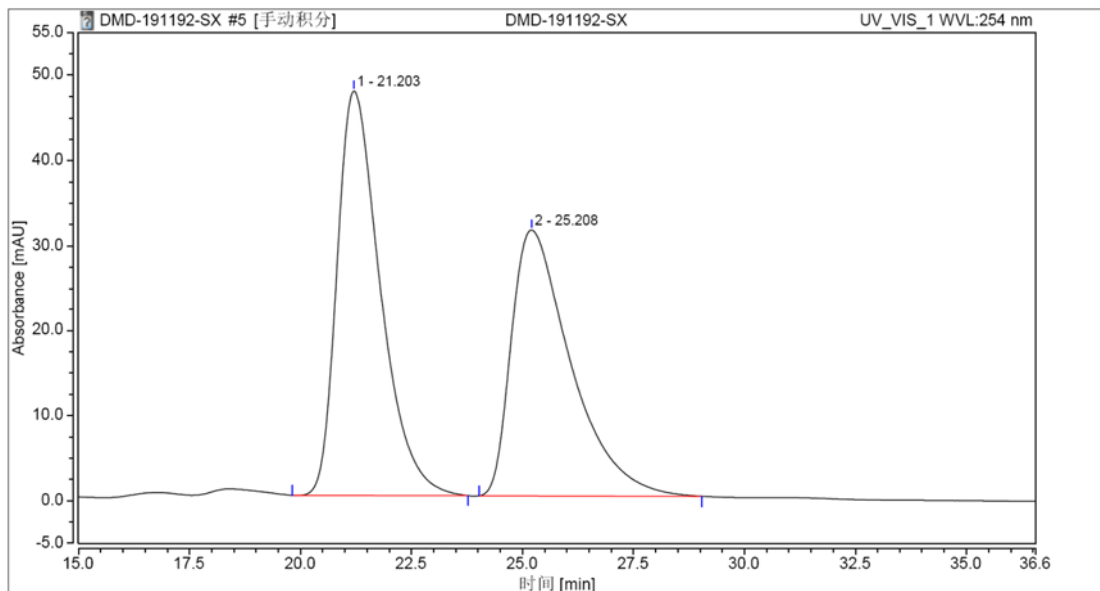

| Peak#        | Ret. Time (min) | Area (mAU)     | Height (mAU)  | Area %        |
|--------------|-----------------|----------------|---------------|---------------|
| 1            | 21.203          | 53.779         | 47.546        | 52.58         |
| 2            | 25.208          | 48.503         | 31.309        | 47.42         |
| <b>Total</b> |                 | <b>102.281</b> | <b>78.855</b> | <b>100.00</b> |

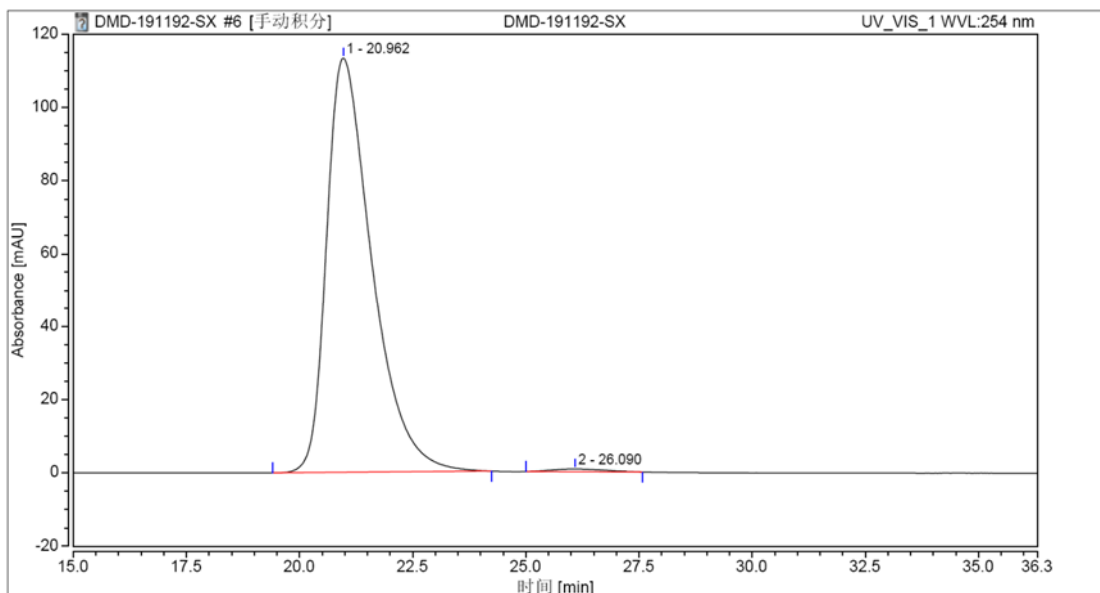

| Peak#        | Ret. Time (min) | Area (mAU)     | Height (mAU)   | Area %        |
|--------------|-----------------|----------------|----------------|---------------|
| 1            | 20.962          | 131.785        | 113.305        | 99.24         |
| 2            | 26.090          | 131.785        | 0.752          | 0.76          |
| <b>Total</b> |                 | <b>132.800</b> | <b>114.056</b> | <b>100.00</b> |

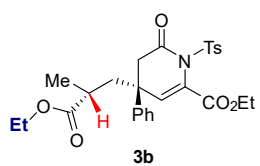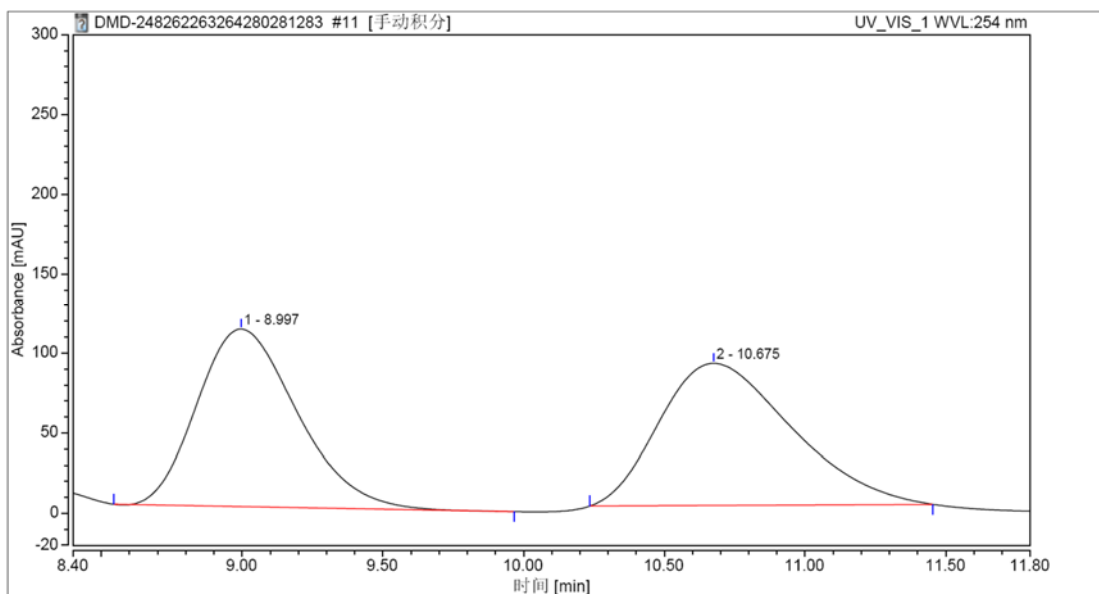

| Peak#        | Ret. Time (min) | Area (mAU)    | Height (mAU)   | Area %        |
|--------------|-----------------|---------------|----------------|---------------|
| 1            | 8.997           | 45.618        | 110.815        | 48.62         |
| 2            | 10.675          | 48.207        | 88.646         | 51.38         |
| <b>Total</b> |                 | <b>93.825</b> | <b>199.460</b> | <b>100.00</b> |

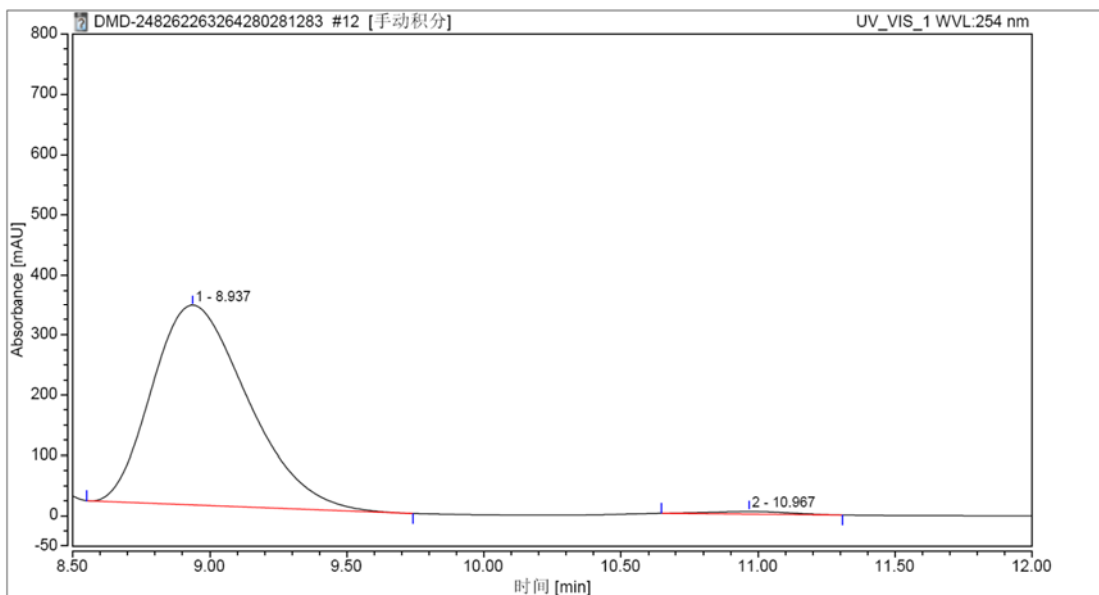

| Peak#        | Ret. Time (min) | Area (mAU)     | Height (mAU)   | Area %        |
|--------------|-----------------|----------------|----------------|---------------|
| 1            | 8.937           | 133.650        | 330.822        | 98.94         |
| 2            | 10.967          | 1.438          | 4.296          | 1.06          |
| <b>Total</b> |                 | <b>135.088</b> | <b>335.117</b> | <b>100.00</b> |

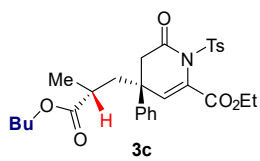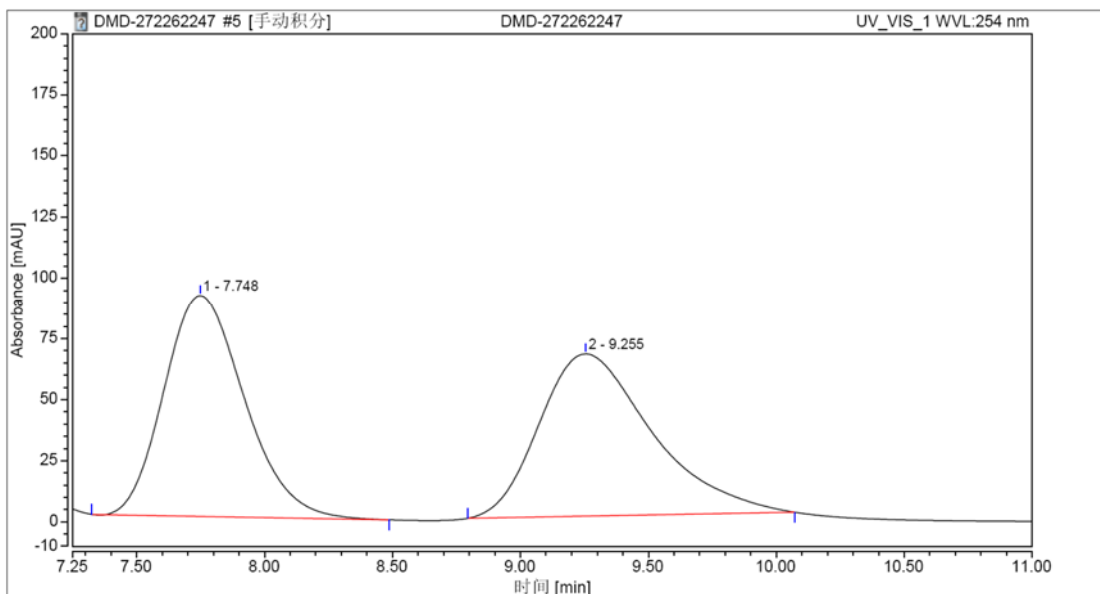

| Peak#        | Ret. Time (min) | Area (mAU)    | Height (mAU)   | Area %        |
|--------------|-----------------|---------------|----------------|---------------|
| 1            | 7.748           | 32.937        | 90.628         | 49.34         |
| 2            | 9.255           | 33.825        | 66.380         | 50.66         |
| <b>Total</b> |                 | <b>66.762</b> | <b>157.008</b> | <b>100.00</b> |

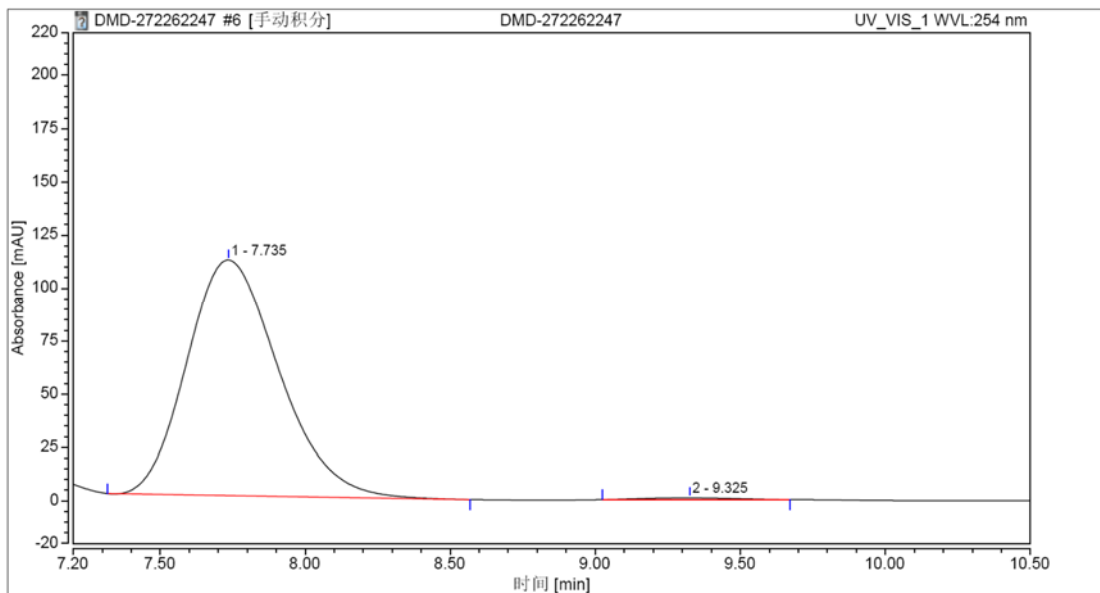

| Peak#        | Ret. Time (min) | Area (mAU)    | Height (mAU)   | Area %        |
|--------------|-----------------|---------------|----------------|---------------|
| 1            | 7.735           | 40.595        | 110.914        | 99.27         |
| 2            | 9.325           | 0.299         | 0.824          | 0.73          |
| <b>Total</b> |                 | <b>40.894</b> | <b>111.738</b> | <b>100.00</b> |

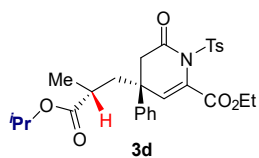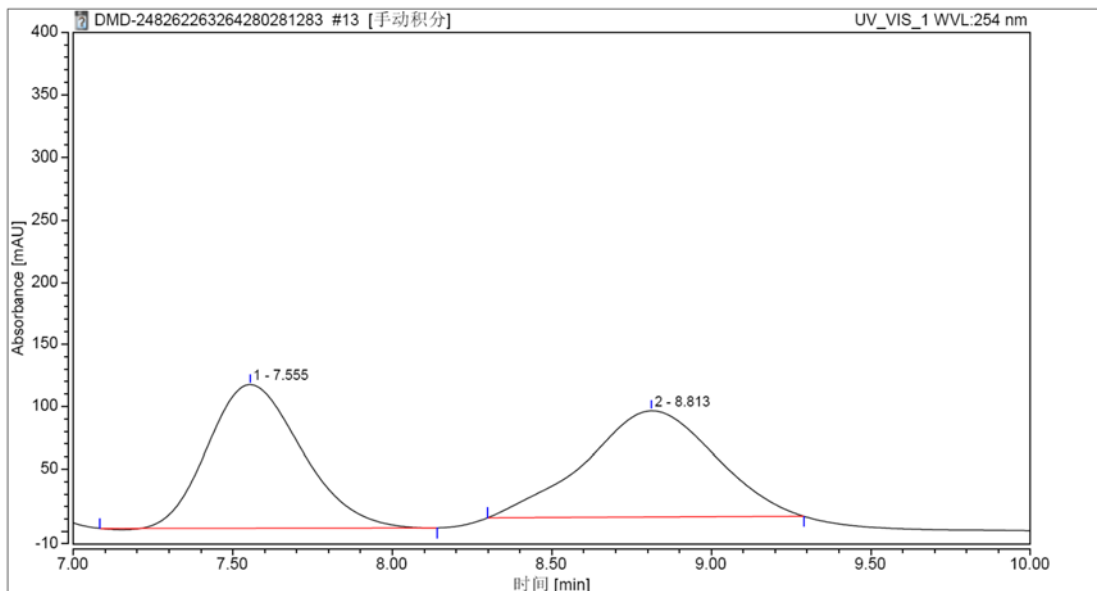

| Peak# | Ret. Time (min) | Area (mAU)    | Height (mAU)   | Area % |
|-------|-----------------|---------------|----------------|--------|
| 1     | 7.555           | 39.126        | 114.863        | 49.48  |
| 2     | 8.813           | 39.941        | 84.858         | 50.52  |
| Total |                 | <b>79.067</b> | <b>199.721</b> | 100.00 |

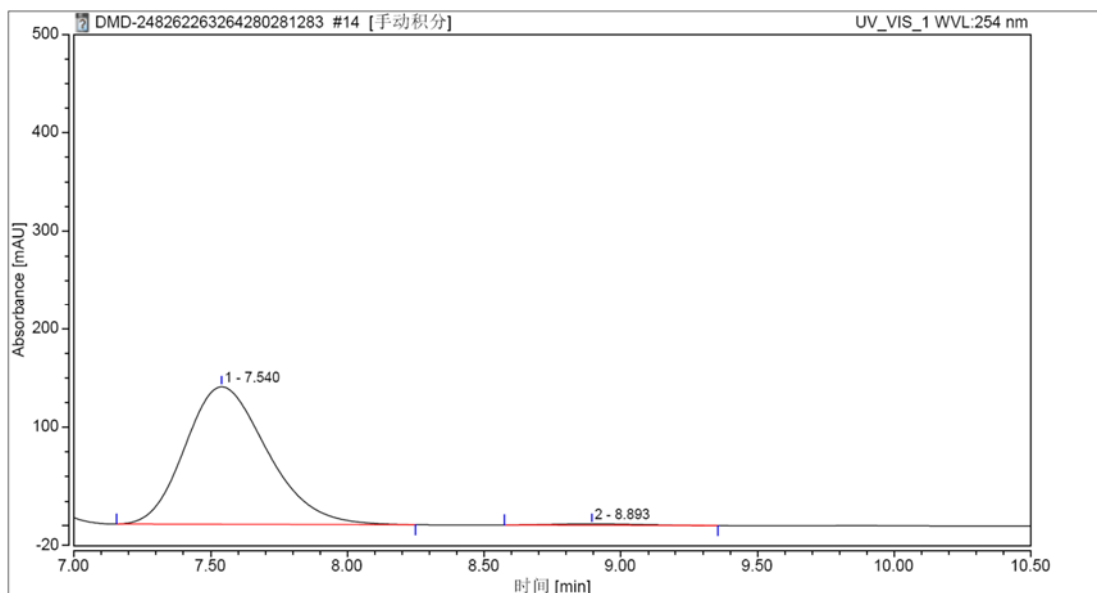

| Peak# | Ret. Time (min) | Area (mAU)    | Height (mAU)   | Area % |
|-------|-----------------|---------------|----------------|--------|
| 1     | 7.540           | 48.630        | 139.469        | 98.94  |
| 2     | 8.893           | 0.520         | 1.326          | 1.06   |
| Total |                 | <b>49.150</b> | <b>140.795</b> | 100.00 |

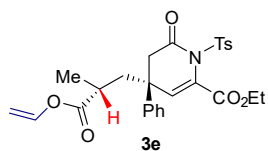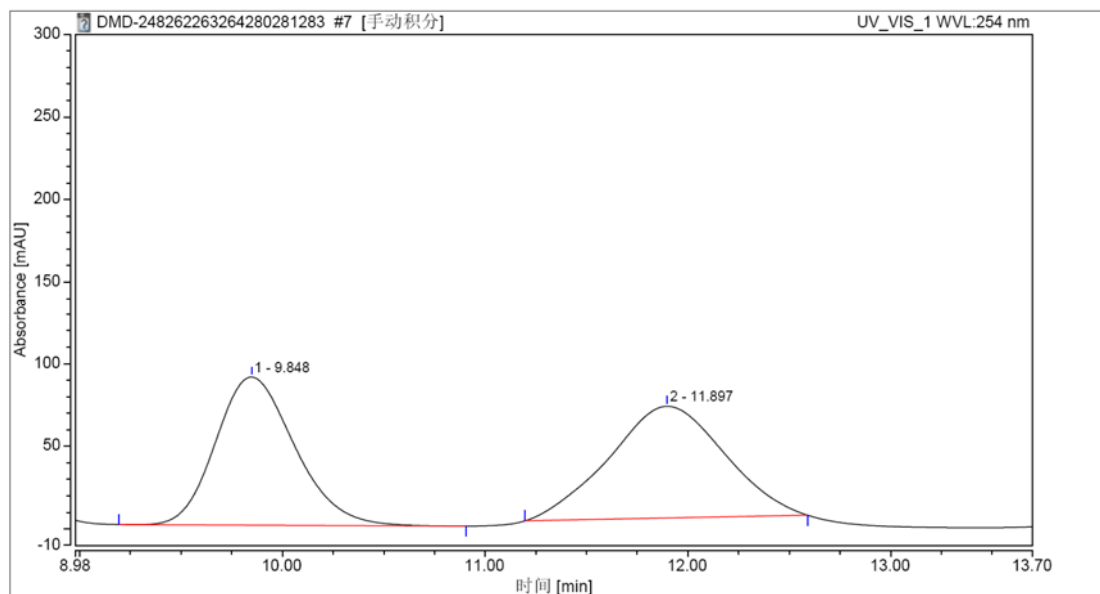

| Peak#        | Ret. Time (min) | Area (mAU)    | Height (mAU)   | Area %        |
|--------------|-----------------|---------------|----------------|---------------|
| 1            | 9.848           | 40.545        | 89.711         | 47.61         |
| 2            | 11.897          | 52.588        | 72.578         | 52.39         |
| <b>Total</b> |                 | <b>93.132</b> | <b>162.289</b> | <b>100.00</b> |

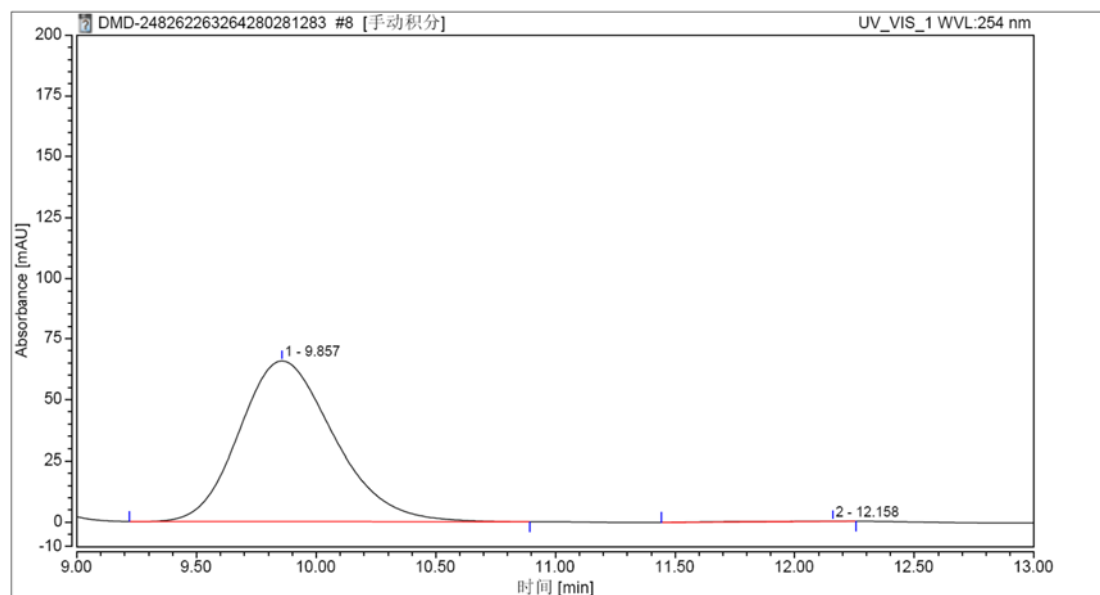

| Peak#        | Ret. Time (min) | Area (mAU)    | Height (mAU)  | Area %        |
|--------------|-----------------|---------------|---------------|---------------|
| 1            | 9.857           | 30.142        | 65.656        | 99.70         |
| 2            | 12.158          | 0.091         | 0.079         | 0.30          |
| <b>Total</b> |                 | <b>30.233</b> | <b>65.735</b> | <b>100.00</b> |

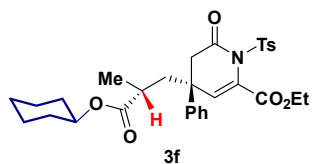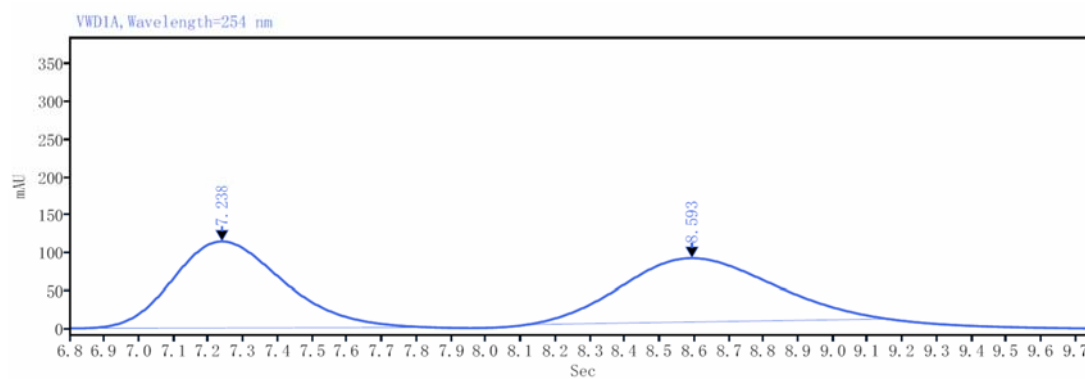

| Peak# | Ret. Time (min) | Area (mAU) | Height (mAU) | Area % |
|-------|-----------------|------------|--------------|--------|
| 1     | 7.238           | 2513.14    | 113.44       | 49.87  |
| 2     | 8.593           | 2526.38    | 83.51        | 50.13  |
| Total |                 | 5039.52    |              | 100.00 |

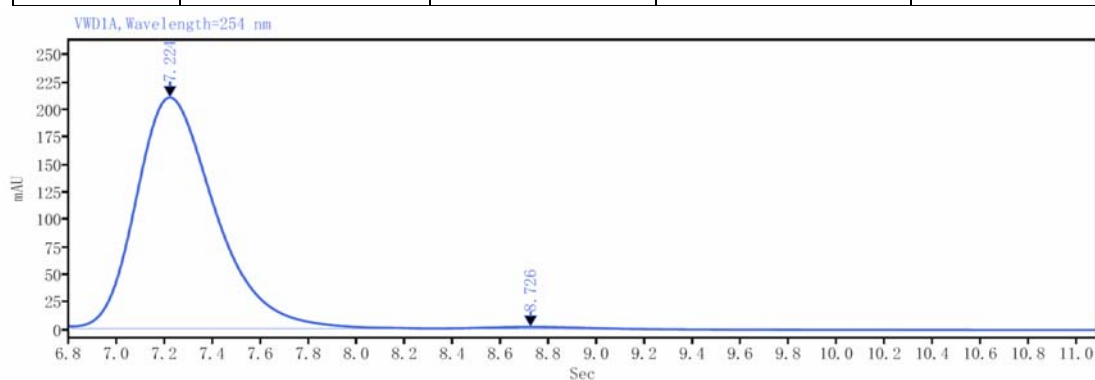

| Peak# | Ret. Time (min) | Area (mAU) | Height (mAU) | Area % |
|-------|-----------------|------------|--------------|--------|
| 1     | 7.224           | 4824.87    | 210.26       | 98.95  |
| 2     | 8.726           | 51.22      | 1.76         | 1.05   |
| Total |                 | 4876.09    |              | 100.00 |



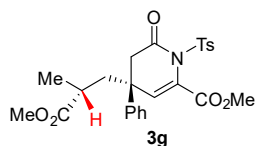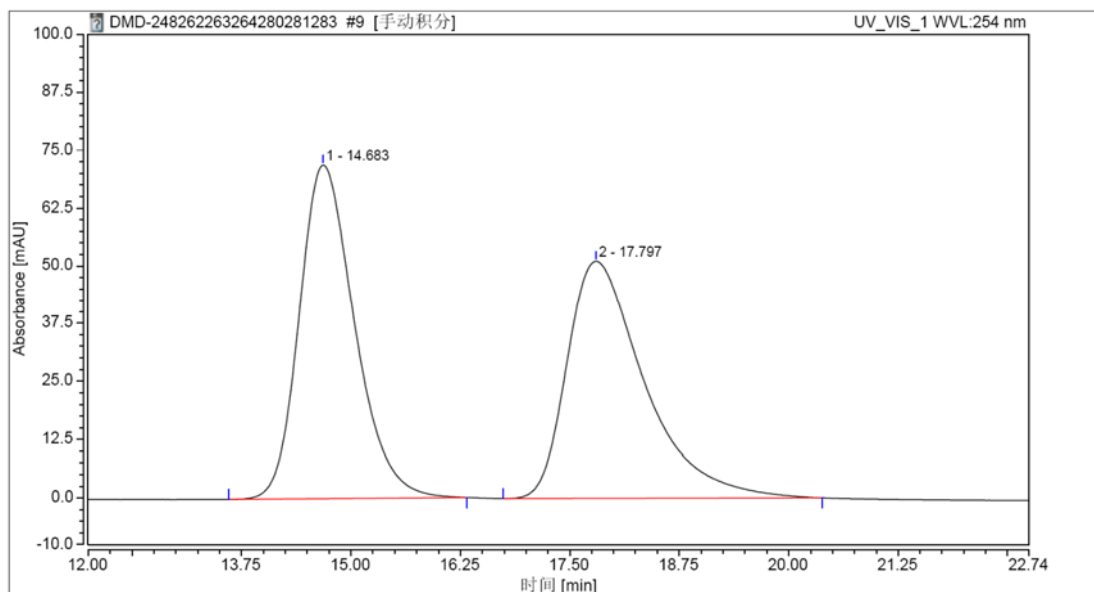

| Peak# | Ret. Time (min) | Area (mAU)     | Height (mAU) | Area % |
|-------|-----------------|----------------|--------------|--------|
| 1     | 14.683          | 52.345         | 71.929       | 50.11  |
| 2     | 17.797          | 52.122         | 51.111       | 49.89  |
| Total |                 | <b>104.467</b> |              | 100.00 |

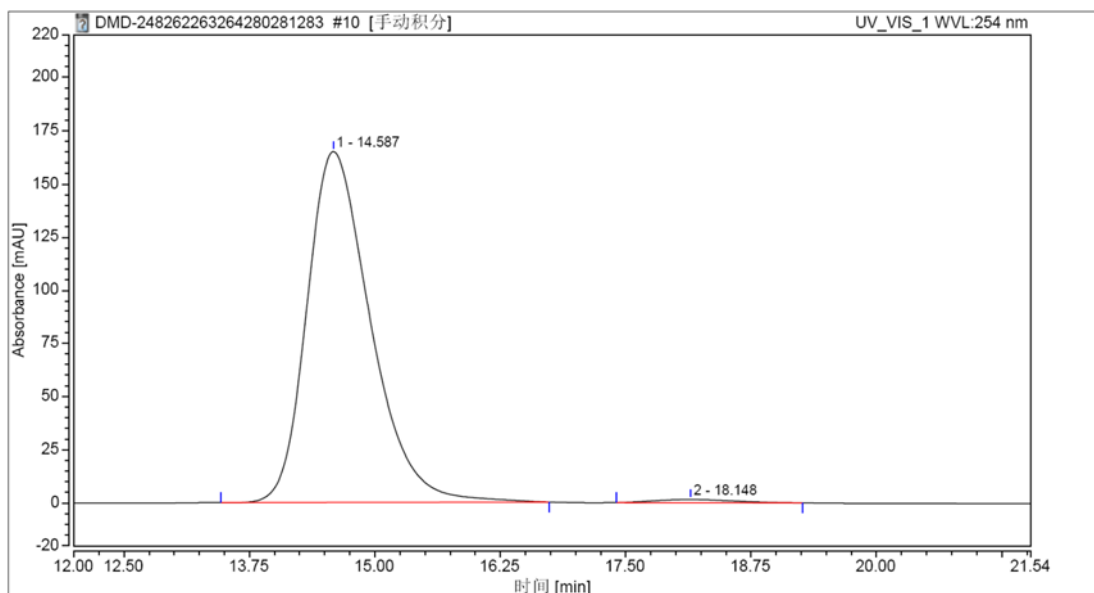

| Peak# | Ret. Time (min) | Area (mAU)     | Height (mAU) | Area % |
|-------|-----------------|----------------|--------------|--------|
| 1     | 14.587          | 121.149        | 164.822      | 98.92  |
| 2     | 18.148          | 1.327          | 1.449        | 1.08   |
| Total |                 | <b>122.477</b> |              | 100.00 |

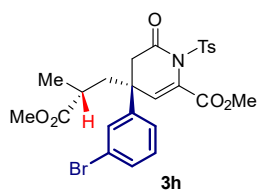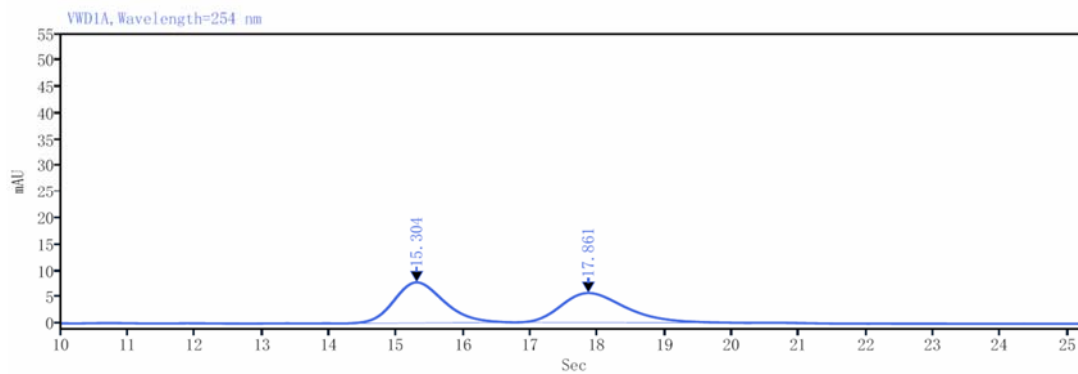

| Peak# | Ret. Time (min) | Area (mAU) | Height (mAU) | Area % |
|-------|-----------------|------------|--------------|--------|
| 1     | 15.304          | 396.03     | 7.68         | 51.65  |
| 2     | 17.861          | 370.74     | 5.57         | 48.35  |
| Total |                 | 766.77     |              | 100.00 |

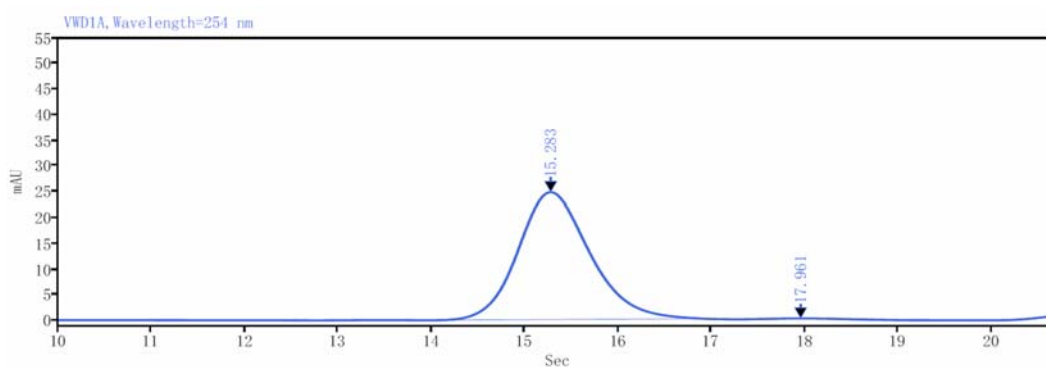

| Peak# | Ret. Time (min) | Area (mAU) | Height (mAU) | Area % |
|-------|-----------------|------------|--------------|--------|
| 1     | 15.283          | 1323.10    | 24.72        | 99.72  |
| 2     | 17.961          | 3.66       | 0.11         | 0.28   |
| Total |                 | 1326.75    |              | 100.00 |

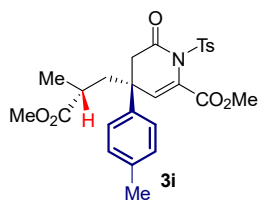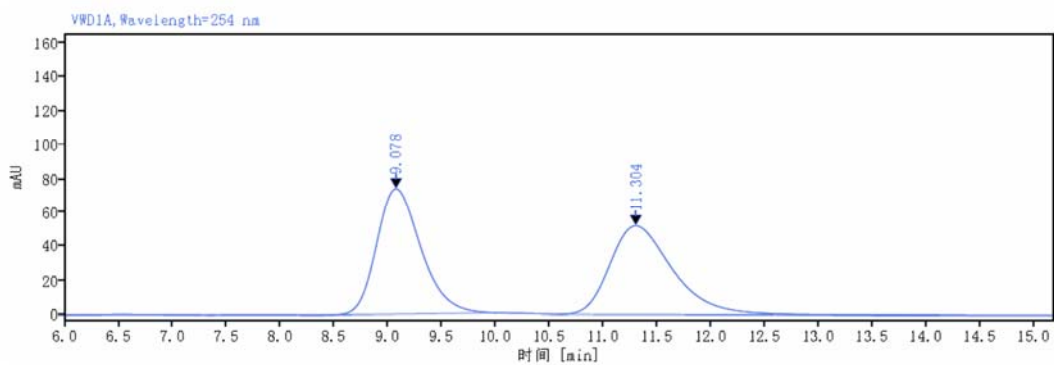

| Peak# | Ret. Time (min) | Area (mAU)     | Height (mAU) | Area % |
|-------|-----------------|----------------|--------------|--------|
| 1     | 9.078           | 2095.73        | 73.76        | 50.03  |
| 2     | 11.304          | 2093.53        | 51.89        | 49.97  |
| Total |                 | <b>4189.25</b> |              | 100.00 |

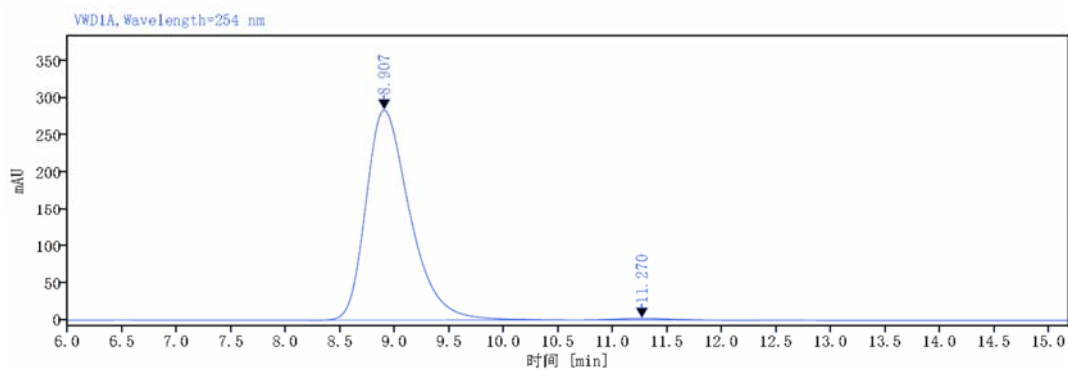

| Peak# | Ret. Time (min) | Area (mAU)     | Height (mAU) | Area % |
|-------|-----------------|----------------|--------------|--------|
| 1     | 8.907           | 7978.37        | 284.18       | 98.98  |
| 2     | 11.270          | 81.94          | 2.15         | 1.02   |
| Total |                 | <b>8060.31</b> |              | 100.00 |

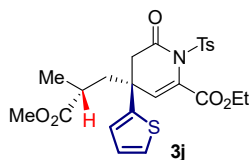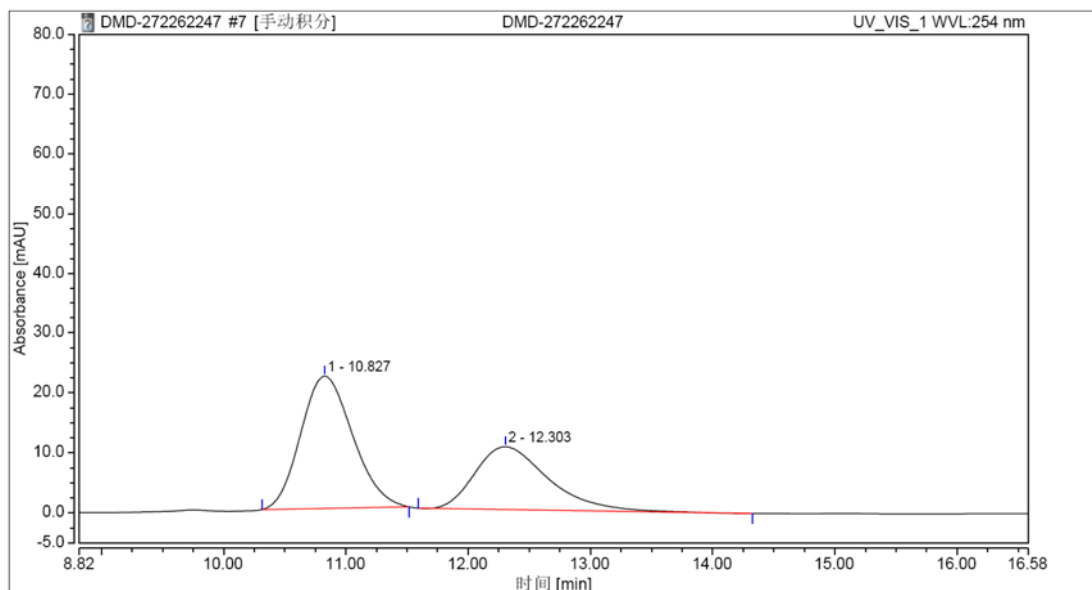

| Peak# | Ret. Time (min) | Area (mAU)    | Height (mAU)  | Area % |
|-------|-----------------|---------------|---------------|--------|
| 1     | 10.827          | 7.979         | 18.989        | 52.40  |
| 2     | 12.303          | 7.249         | 10.446        | 47.60  |
| Total |                 | <b>15.227</b> | <b>29.434</b> | 100.00 |

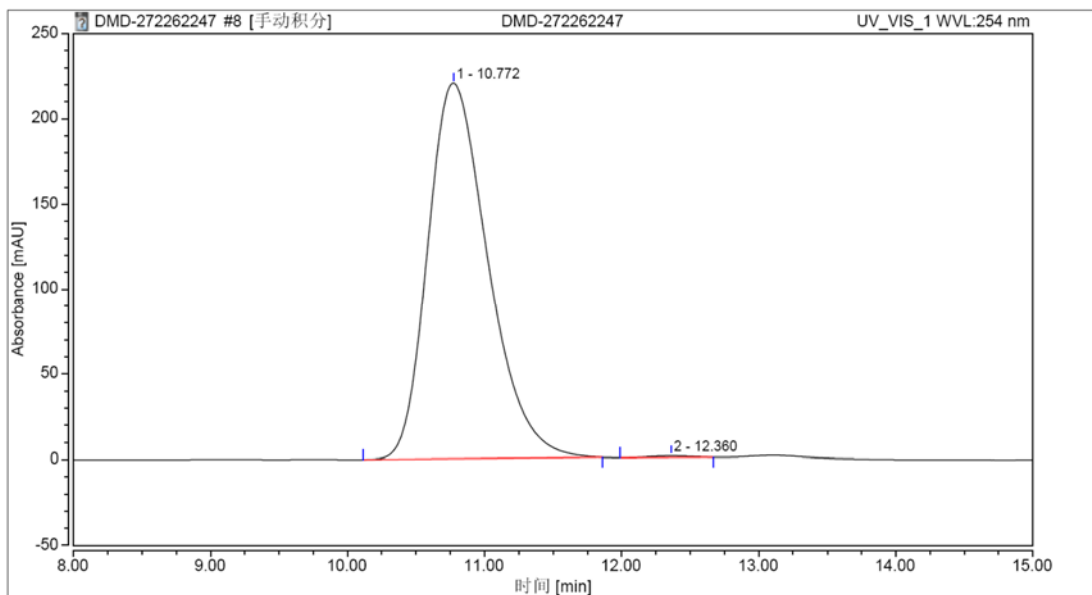

| Peak# | Ret. Time (min) | Area (mAU)     | Height (mAU)   | Area % |
|-------|-----------------|----------------|----------------|--------|
| 1     | 10.772          | 112.147        | 220.392        | 99.75  |
| 2     | 12.360          | 0.284          | 0.835          | 0.25   |
| Total |                 | <b>112.431</b> | <b>221.227</b> | 100.00 |

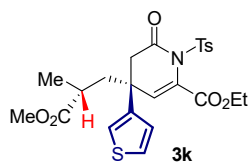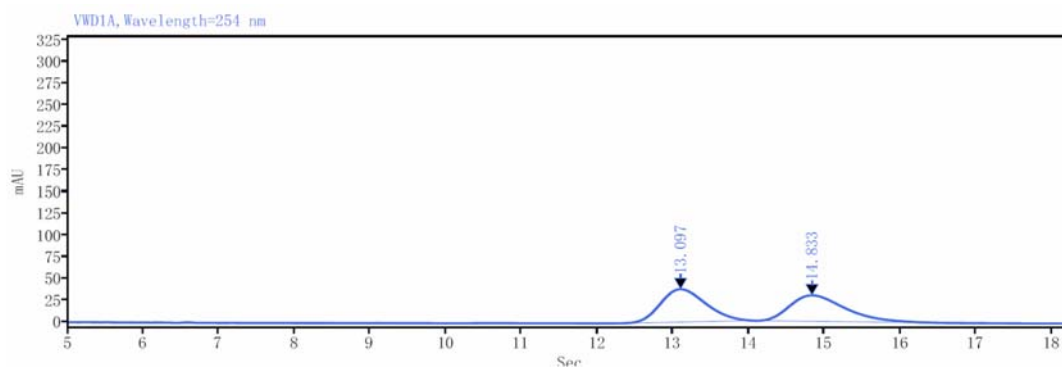

| Peak# | Ret. Time (min) | Area (mAU) | Height (mAU) | Area % |
|-------|-----------------|------------|--------------|--------|
| 1     | 13.097          | 1574.84    | 38.02        | 50.88  |
| 2     | 14.833          | 1520.45    | 30.05        | 49.12  |
| Total |                 | 3095.29    |              | 100.00 |

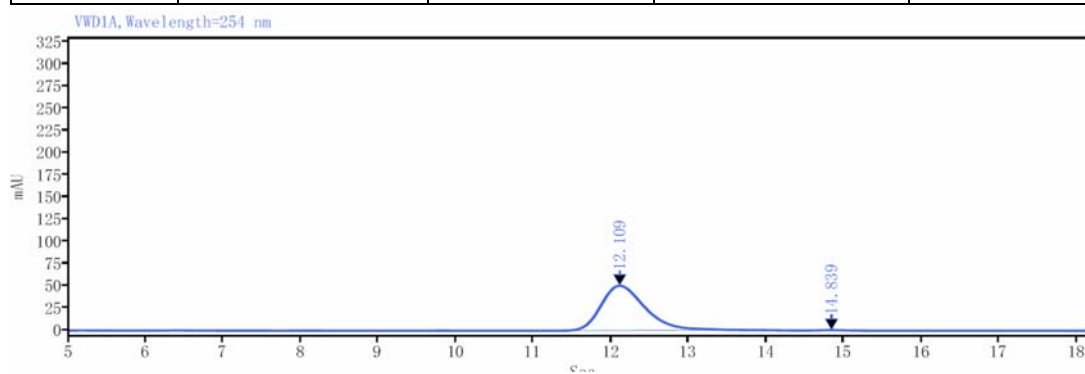

| Peak# | Ret. Time (min) | Area (mAU) | Height (mAU) | Area % |
|-------|-----------------|------------|--------------|--------|
| 1     | 12.109          | 1981.60    | 50.46        | 99.38  |
| 2     | 14.839          | 12.35      | 0.51         | 0.62   |
| Total |                 | 1993.95    |              | 100.00 |

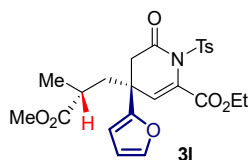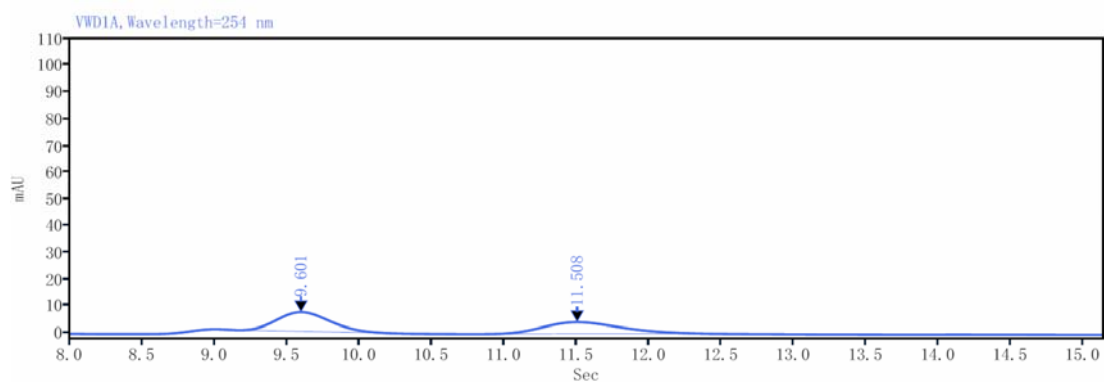

| Peak# | Ret. Time (min) | Area (mAU) | Height (mAU) | Area % |
|-------|-----------------|------------|--------------|--------|
| 1     | 9.601           | 177.25     | 7.00         | 52.91  |
| 2     | 11.508          | 157.75     | 4.22         | 47.09  |
| Total |                 | 335.00     |              | 100.00 |

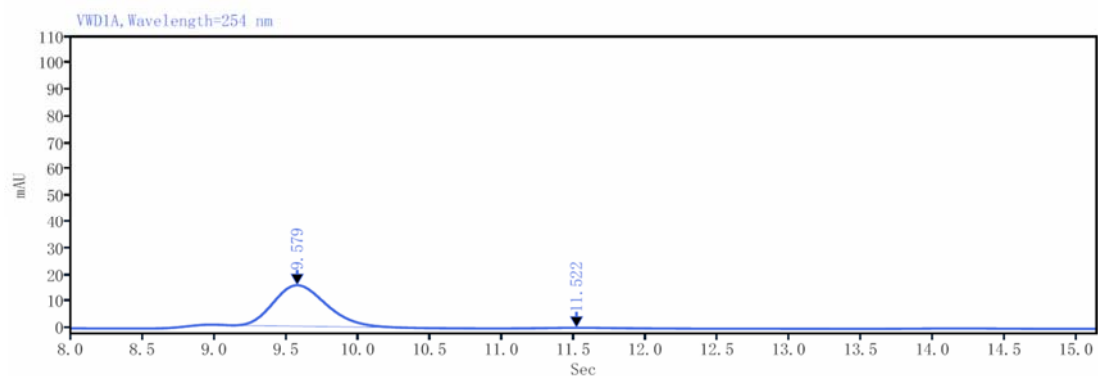

| Peak# | Ret. Time (min) | Area (mAU) | Height (mAU) | Area % |
|-------|-----------------|------------|--------------|--------|
| 1     | 9.579           | 393.65     | 15.38        | 98.38  |
| 2     | 11.522          | 6.49       | 0.22         | 1.62   |
| Total |                 | 400.14     |              | 100.00 |

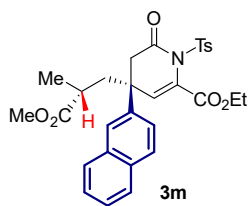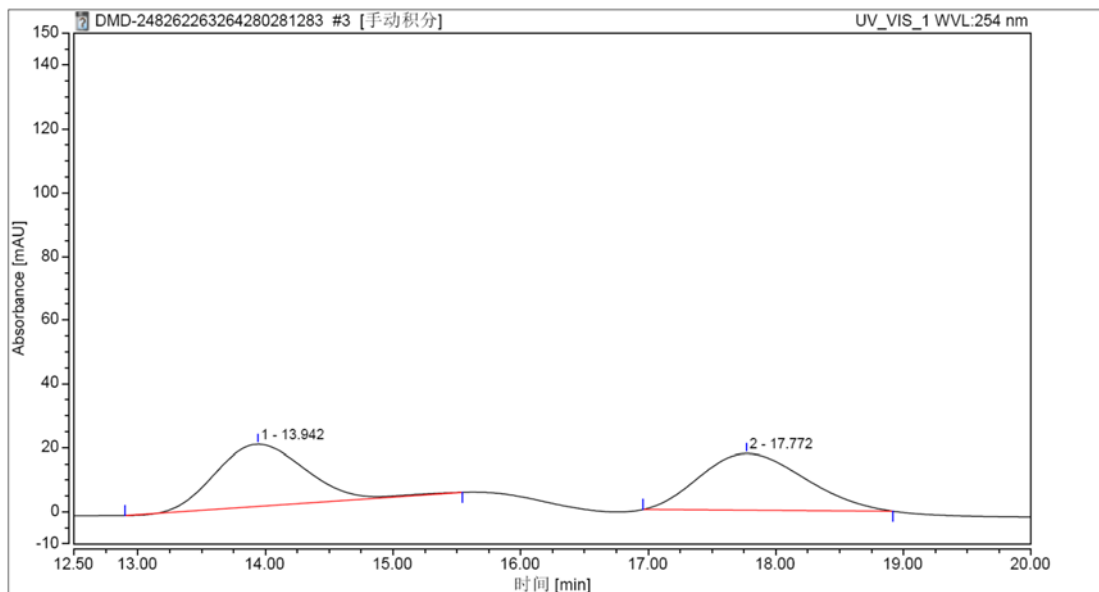

| Peak# | Ret. Time (min) | Area (mAU)    | Height (mAU)  | Area % |
|-------|-----------------|---------------|---------------|--------|
| 1     | 13.942          | 15.709        | 19.340        | 48.28  |
| 2     | 17.772          | 16.827        | 17.668        | 51.72  |
| Total |                 | <b>32.536</b> | <b>37.008</b> | 100.00 |

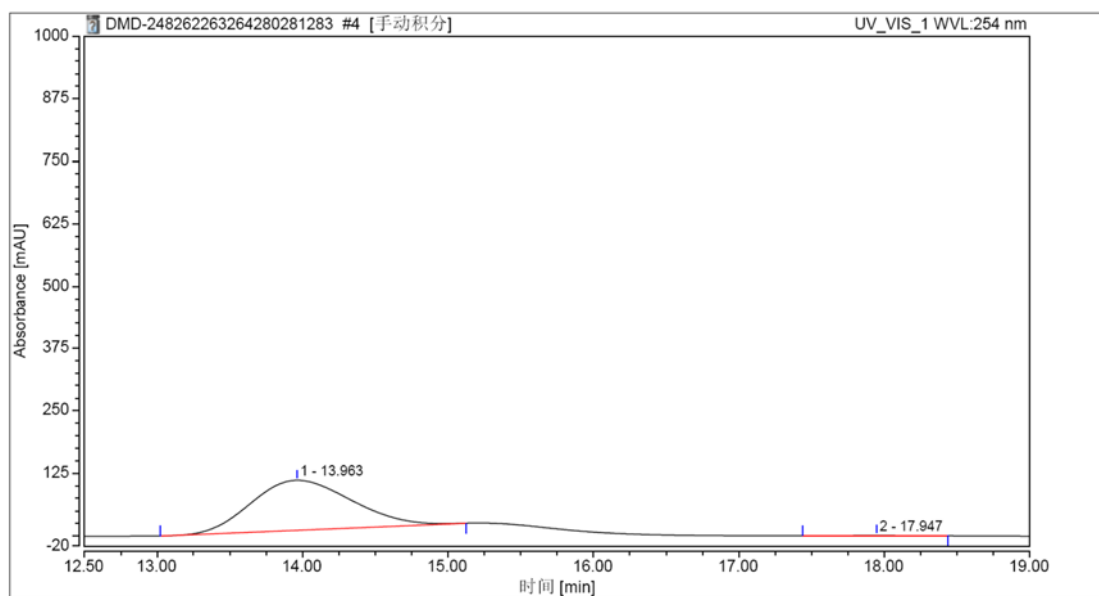

| Peak# | Ret. Time (min) | Area (mAU)    | Height (mAU)   | Area % |
|-------|-----------------|---------------|----------------|--------|
| 1     | 13.963          | 79.183        | 99.650         | 99.67  |
| 2     | 17.947          | 0.266         | 0.447          | 0.33   |
| Total |                 | <b>79.449</b> | <b>100.098</b> | 100.00 |

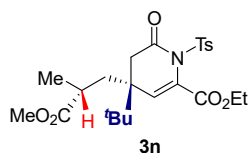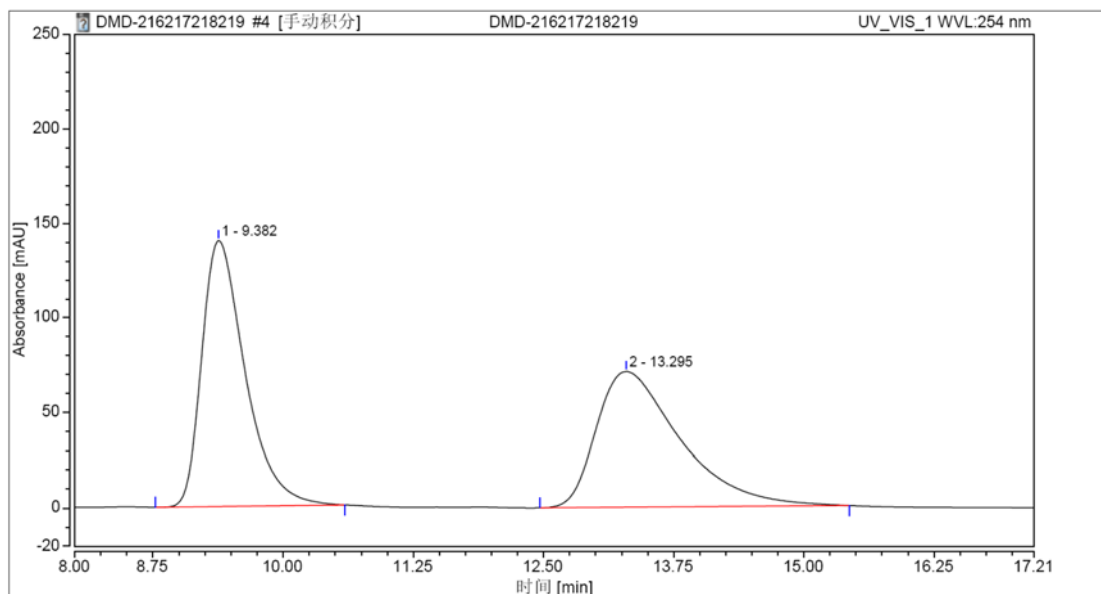

| Peak#        | Ret. Time (min) | Area (mAU)     | Height (mAU)   | Area %        |
|--------------|-----------------|----------------|----------------|---------------|
| 1            | 9.382           | 67.279         | 140.227        | 50.40         |
| 2            | 13.295          | 66.220         | 71.073         | 49.60         |
| <b>Total</b> |                 | <b>133.499</b> | <b>211.299</b> | <b>100.00</b> |

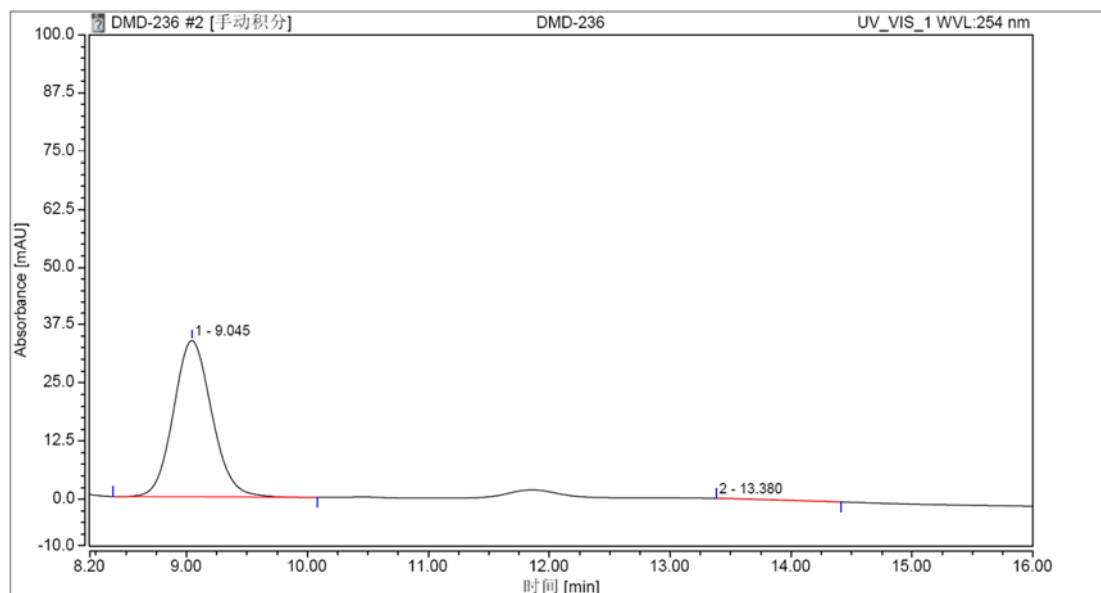

| Peak#        | Ret. Time (min) | Area (mAU)    | Height (mAU)  | Area %        |
|--------------|-----------------|---------------|---------------|---------------|
| 1            | 9.045           | 12.327        | 33.543        | 99.76         |
| 2            | 13.380          | 0.030         | 0.000         | 0.24          |
| <b>Total</b> |                 | <b>12.357</b> | <b>33.543</b> | <b>100.00</b> |



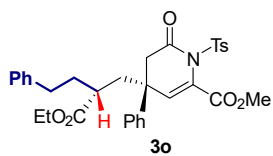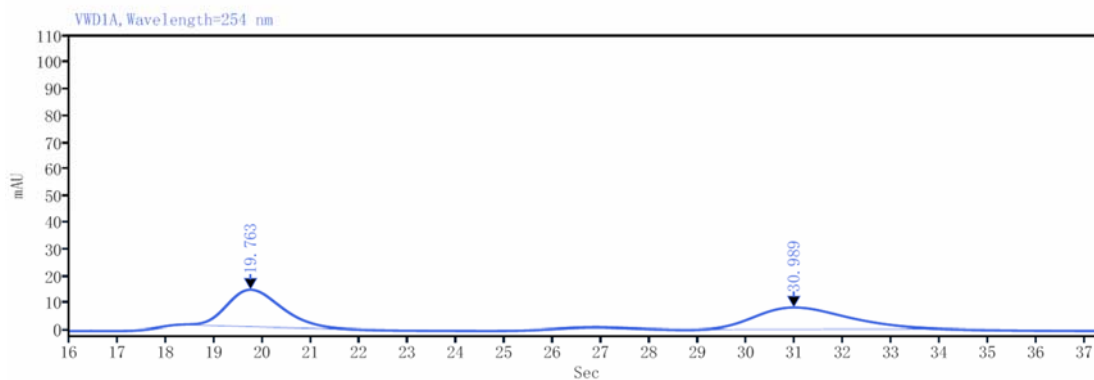

| Peak# | Ret. Time (min) | Area (mAU) | Height (mAU) | Area % |
|-------|-----------------|------------|--------------|--------|
| 1     | 19.763          | 1076.30    | 13.67        | 50.65  |
| 2     | 30.989          | 1048.71    | 7.95         | 49.35  |
| Total |                 | 2125.02    |              | 100.00 |

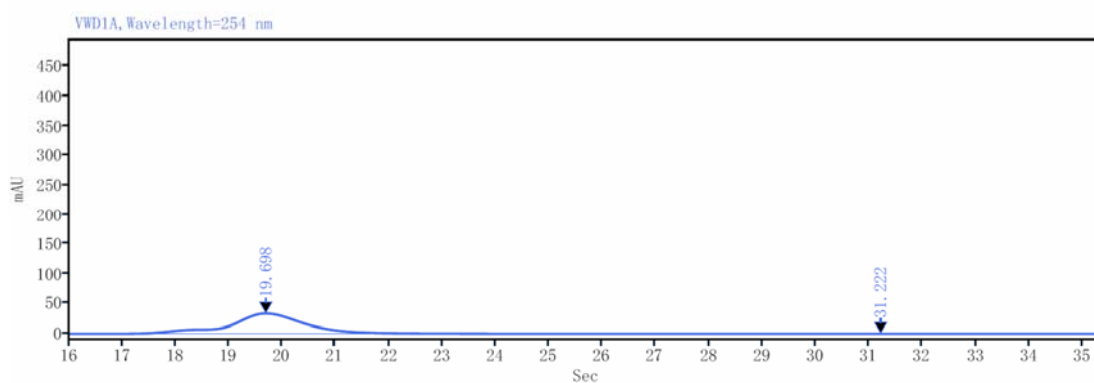

| Peak# | Ret. Time (min) | Area (mAU) | Height (mAU) | Area % |
|-------|-----------------|------------|--------------|--------|
| 1     | 19.698          | 3230.20    | 33.47        | 99.69  |
| 2     | 31.222          | 10.04      | 0.09         | 0.31   |
| Total |                 | 3240.24    |              | 100.00 |

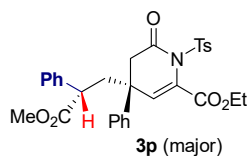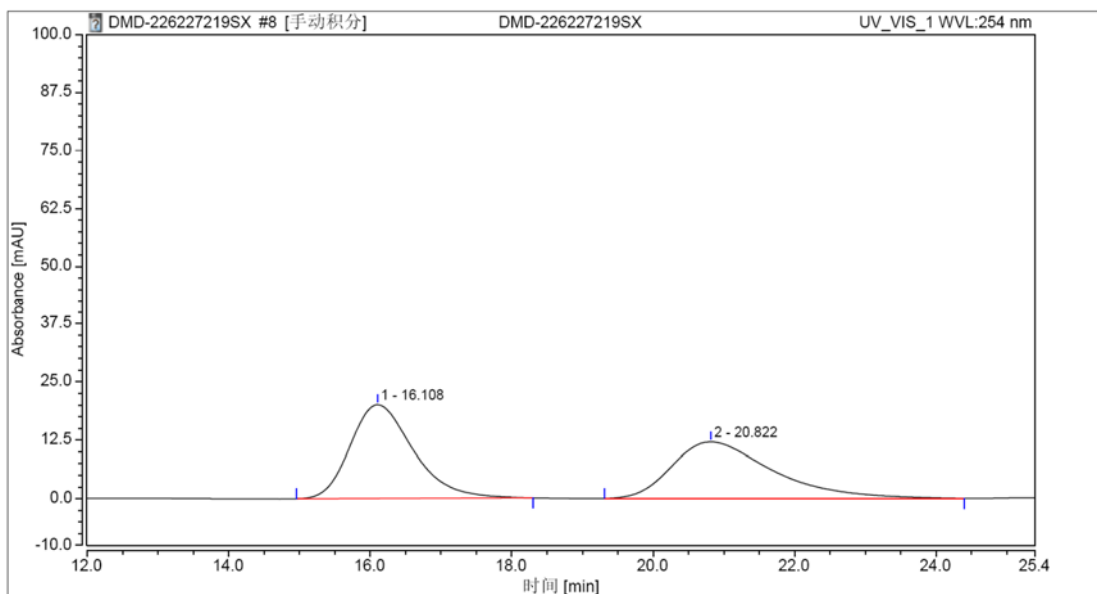

| Peak# | Ret. Time (min) | Area (mAU)    | Height (mAU)  | Area % |
|-------|-----------------|---------------|---------------|--------|
| 1     | 16.108          | 20.626        | 20.004        | 51.03  |
| 2     | 20.822          | 19.790        | 12.030        | 48.97  |
| Total |                 | <b>40.416</b> | <b>32.034</b> | 100.00 |

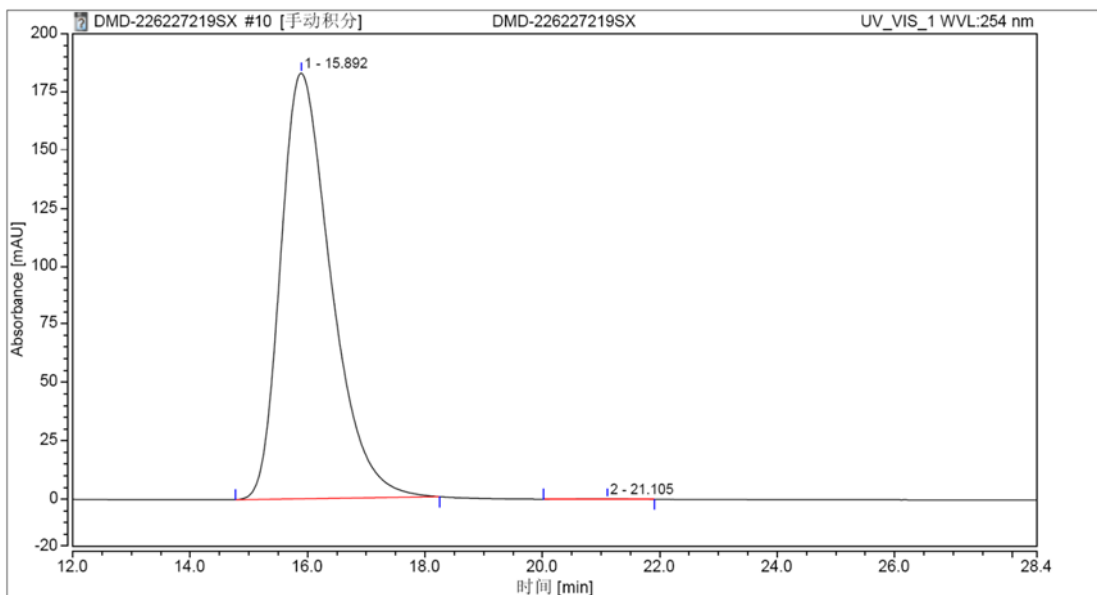

| Peak# | Ret. Time (min) | Area (mAU)     | Height (mAU)   | Area % |
|-------|-----------------|----------------|----------------|--------|
| 1     | 15.892          | 181.453        | 182.777        | 99.88  |
| 2     | 21.105          | 0.213          | 0.207          | 0.12   |
| Total |                 | <b>181.667</b> | <b>182.984</b> | 100.00 |

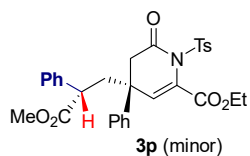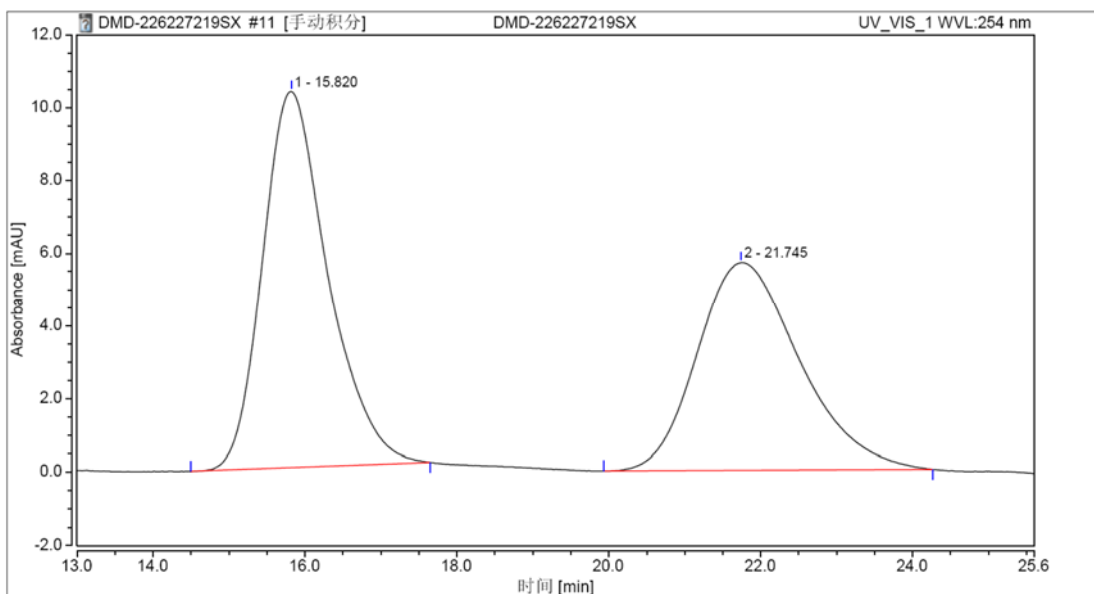

| Peak# | Ret. Time (min) | Area (mAU)    | Height (mAU)  | Area % |
|-------|-----------------|---------------|---------------|--------|
| 1     | 15.820          | 10.260        | 10.323        | 53.71  |
| 2     | 21.745          | 8.841         | 5.697         | 46.29  |
| Total |                 | <b>19.101</b> | <b>16.021</b> | 100.00 |

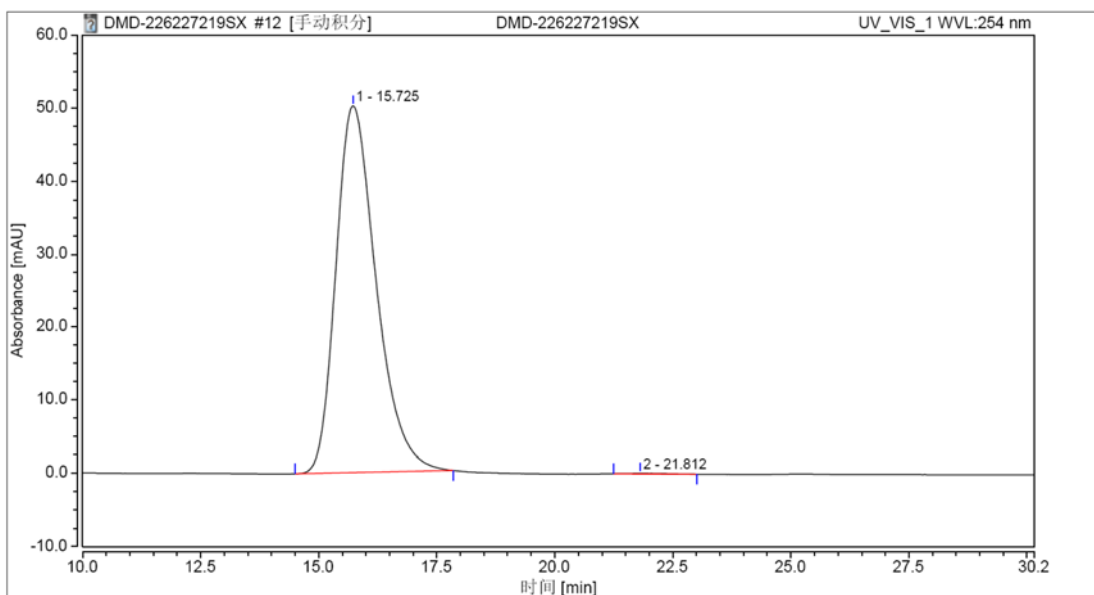

| Peak# | Ret. Time (min) | Area (mAU)    | Height (mAU)  | Area % |
|-------|-----------------|---------------|---------------|--------|
| 1     | 15.725          | 49.599        | 50.217        | 99.86  |
| 2     | 21.812          | 0.069         | 0.068         | 0.14   |
| Total |                 | <b>49.668</b> | <b>50.285</b> | 100.00 |

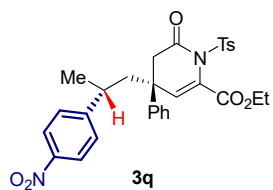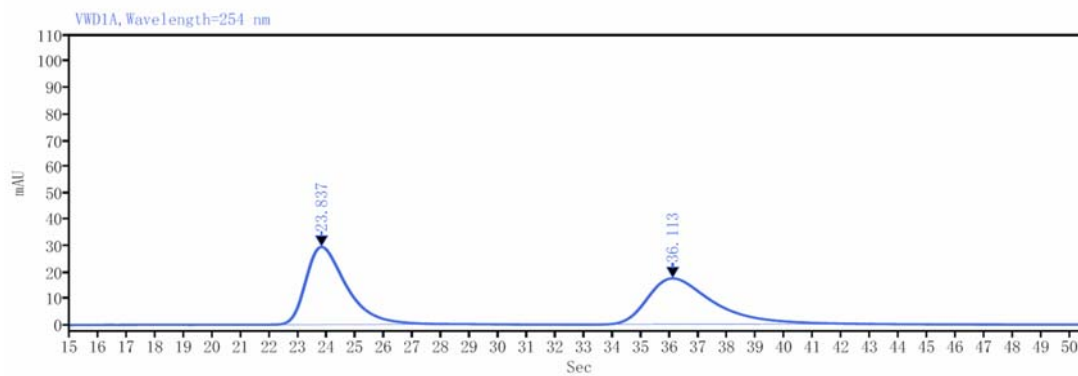

| Peak# | Ret. Time (min) | Area (mAU) | Height (mAU) | Area % |
|-------|-----------------|------------|--------------|--------|
| 1     | 23.837          | 2878.13    | 29.19        | 51.19  |
| 2     | 36.113          | 2744.40    | 17.22        | 48.81  |
| Total |                 | 5622.54    |              | 100.00 |

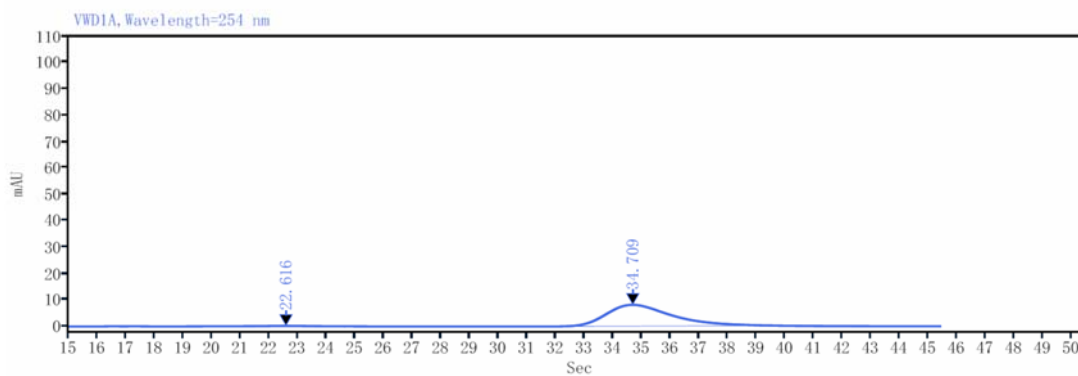

| Peak# | Ret. Time (min) | Area (mAU) | Height (mAU) | Area % |
|-------|-----------------|------------|--------------|--------|
| 1     | 22.616          | 9.34       | 0.13         | 0.73   |
| 2     | 34.709          | 1269.31    | 8.03         | 99.27  |
| Total |                 | 1278.65    |              | 100.00 |

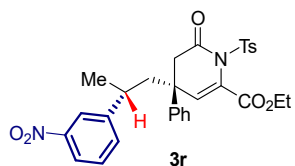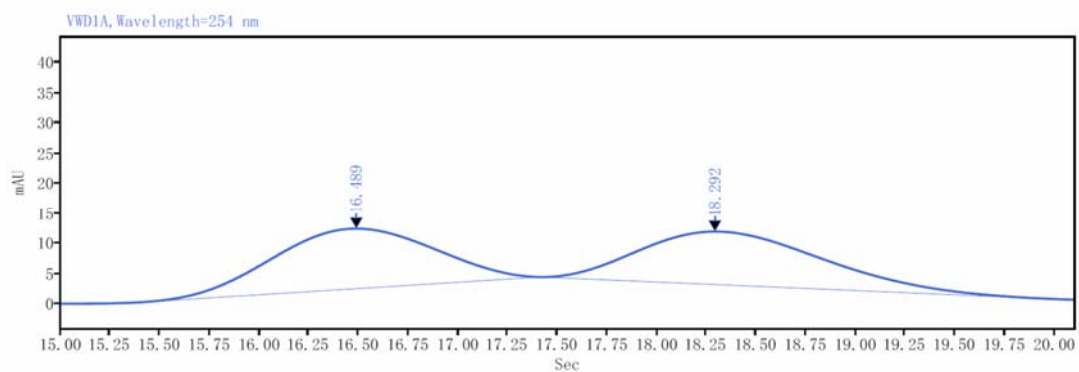

| Peak# | Ret. Time (min) | Area (mAU) | Height (mAU) | Area % |
|-------|-----------------|------------|--------------|--------|
| 1     | 16.489          | 555.85     | 9.88         | 49.85  |
| 2     | 18.292          | 559.15     | 8.70         | 50.15  |
| Total |                 | 1115.00    |              | 100.00 |

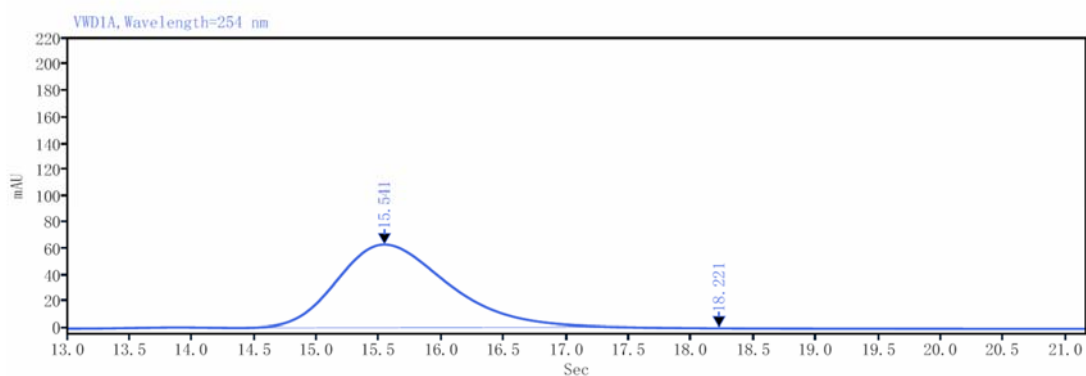

| Peak# | Ret. Time (min) | Area (mAU) | Height (mAU) | Area % |
|-------|-----------------|------------|--------------|--------|
| 1     | 15.541          | 3850.91    | 62.45        | 99.90  |
| 2     | 18.221          | 3.81       | 0.10         | 0.10   |
| Total |                 | 3854.71    |              | 100.00 |

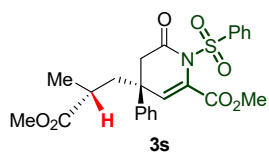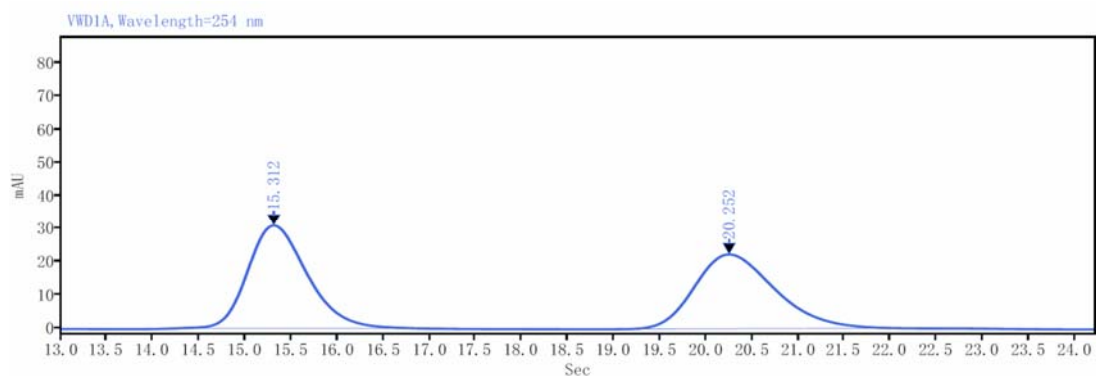

| Peak# | Ret. Time (min) | Area (mAU) | Height (mAU) | Area % |
|-------|-----------------|------------|--------------|--------|
| 1     | 15.312          | 1391.11    | 30.99        | 50.80  |
| 2     | 20.252          | 1347.35    | 22.31        | 49.20  |
| Total |                 | 2738.46    |              | 100.00 |

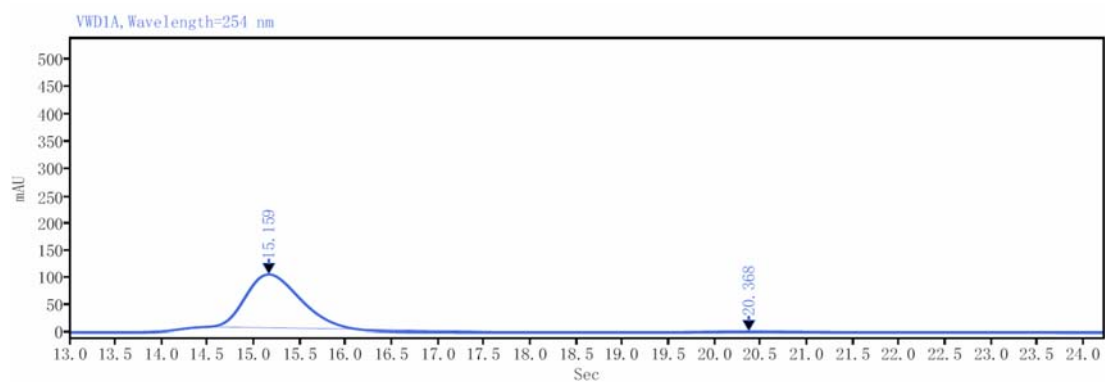

| Peak# | Ret. Time (min) | Area (mAU) | Height (mAU) | Area % |
|-------|-----------------|------------|--------------|--------|
| 1     | 15.159          | 3759.41    | 97.83        | 98.23  |
| 2     | 20.368          | 67.92      | 1.18         | 1.77   |
| Total |                 | 3827.33    |              | 100.00 |

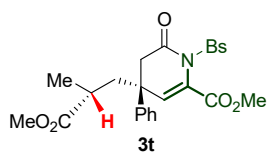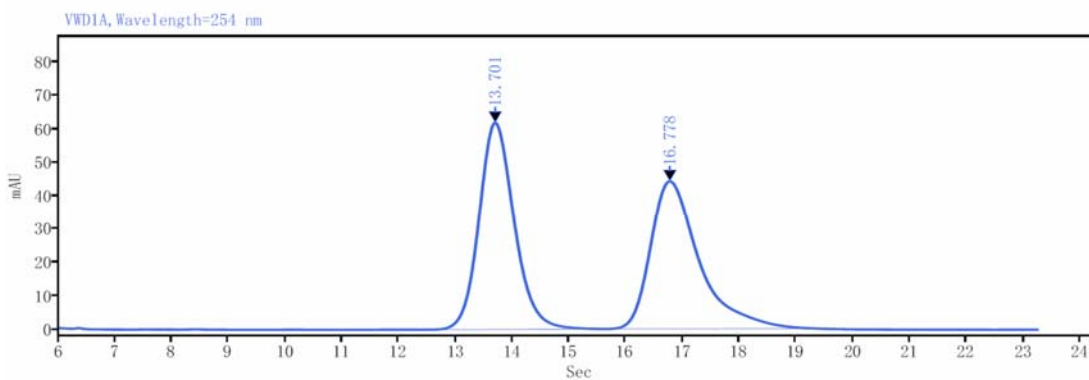

| Peak# | Ret. Time (min) | Area (mAU) | Height (mAU) | Area % |
|-------|-----------------|------------|--------------|--------|
| 1     | 13.701          | 2663.71    | 61.96        | 50.43  |
| 2     | 16.778          | 2618.58    | 44.23        | 49.57  |
| Total |                 | 5282.29    |              | 100.00 |

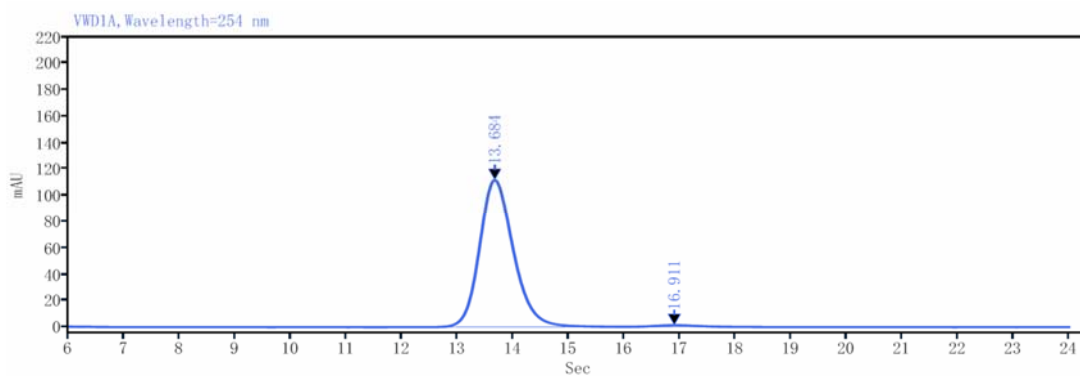

| Peak# | Ret. Time (min) | Area (mAU) | Height (mAU) | Area % |
|-------|-----------------|------------|--------------|--------|
| 1     | 13.684          | 4728.52    | 111.89       | 98.83  |
| 2     | 16.911          | 55.92      | 1.15         | 1.17   |
| Total |                 | 4784.44    |              | 100.00 |

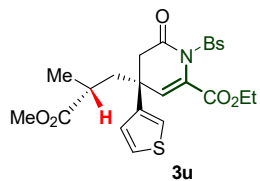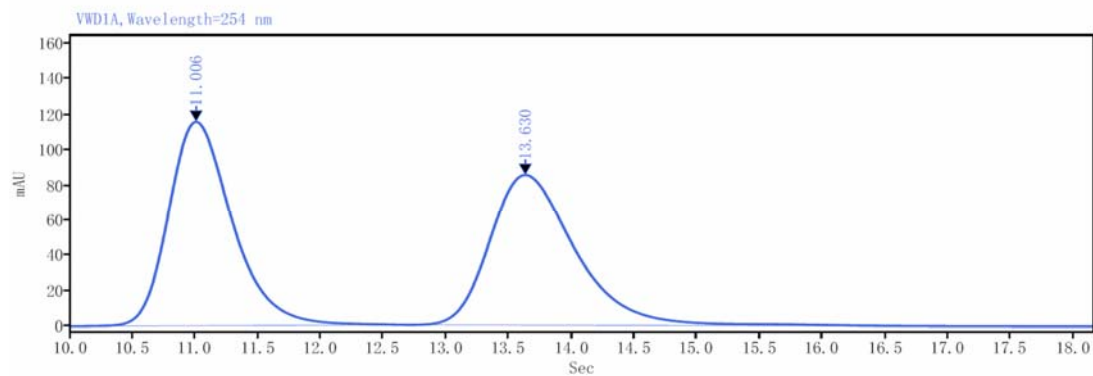

| Peak# | Ret. Time (min) | Area (mAU) | Height (mAU) | Area % |
|-------|-----------------|------------|--------------|--------|
| 1     | 11.006          | 4089.04    | 115.96       | 50.34  |
| 2     | 13.630          | 4034.25    | 85.51        | 49.66  |
| Total |                 | 8123.29    |              | 100.00 |

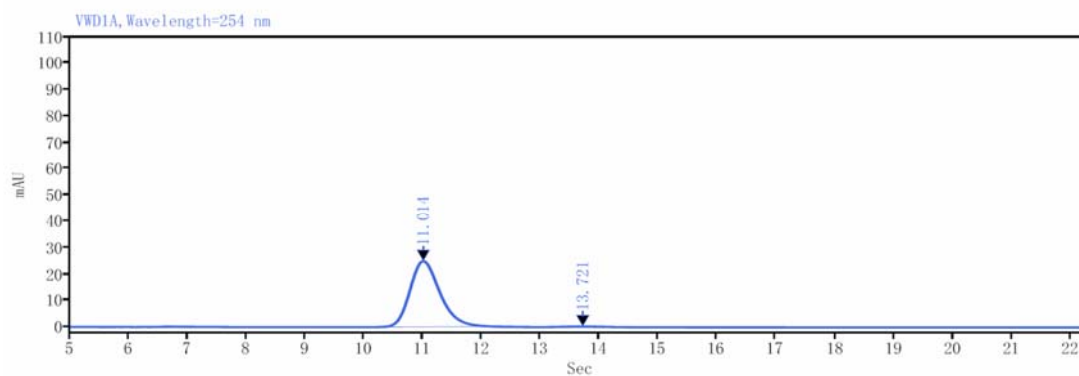

| Peak# | Ret. Time (min) | Area (mAU) | Height (mAU) | Area % |
|-------|-----------------|------------|--------------|--------|
| 1     | 11.014          | 872.10     | 24.71        | 99.02  |
| 2     | 13.721          | 8.64       | 0.22         | 0.98   |
| Total |                 | 8123.29    |              | 100.00 |



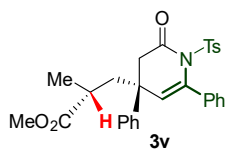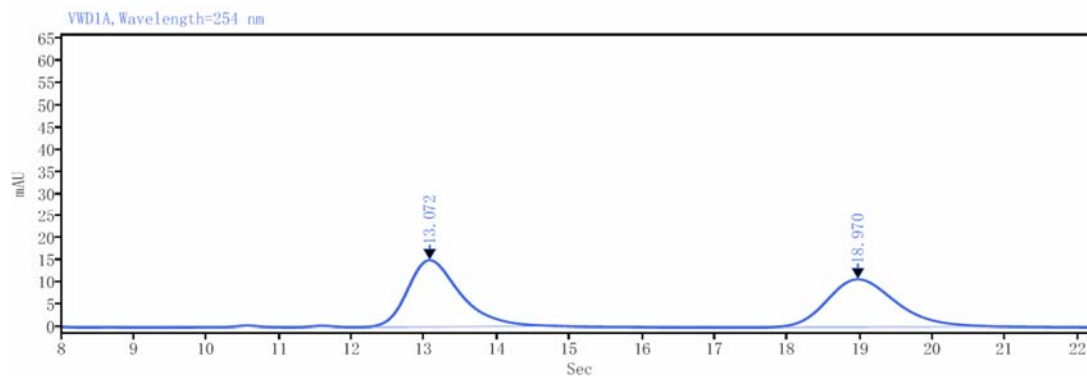

| Peak# | Ret. Time (min) | Area (mAU) | Height (mAU) | Area % |
|-------|-----------------|------------|--------------|--------|
| 1     | 13.072          | 752.32     | 14.98        | 51.80  |
| 2     | 18.970          | 700.17     | 10.69        | 48.20  |
| Total |                 | 1452.49    |              | 100.00 |

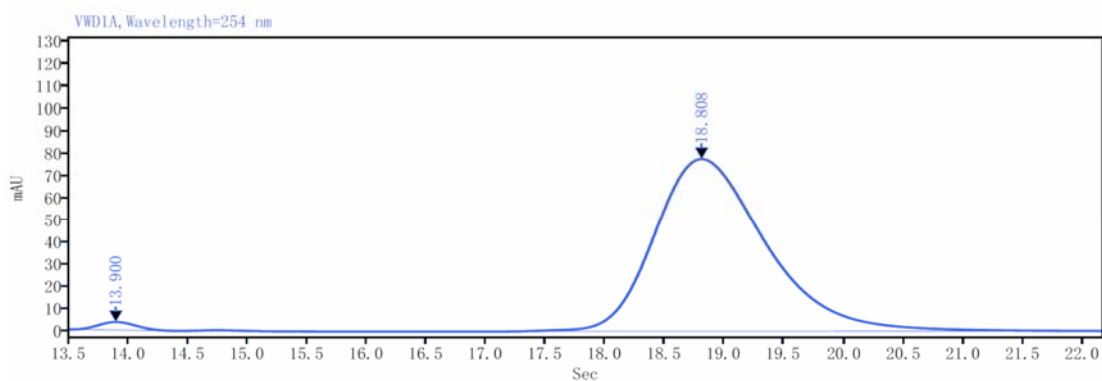

| Peak# | Ret. Time (min) | Area (mAU) | Height (mAU) | Area % |
|-------|-----------------|------------|--------------|--------|
| 1     | 13.900          | 79.17      | 3.62         | 1.55   |
| 2     | 18.808          | 5043.86    | 77.72        | 98.45  |
| Total |                 | 5123.03    |              | 100.00 |

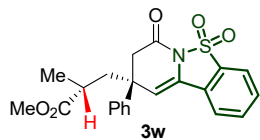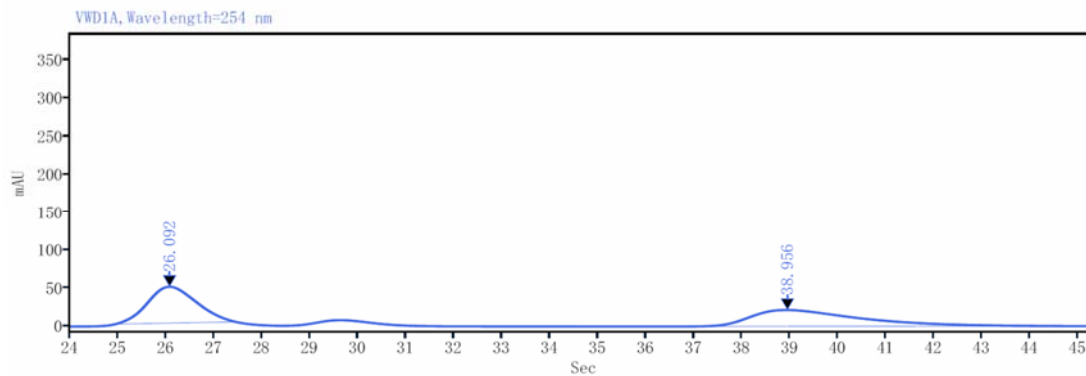

| Peak# | Ret. Time (min) | Area (mAU) | Height (mAU) | Area % |
|-------|-----------------|------------|--------------|--------|
| 1     | 26.092          | 3373.33    | 47.82        | 50.28  |
| 2     | 38.956          | 3336.02    | 21.47        | 49.72  |
| Total |                 | 6709.35    |              | 100.00 |

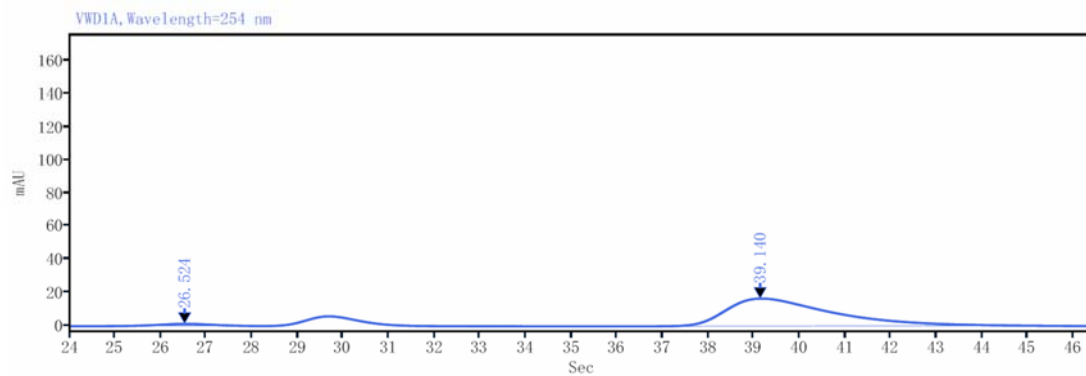

| Peak# | Ret. Time (min) | Area (mAU) | Height (mAU) | Area % |
|-------|-----------------|------------|--------------|--------|
| 1     | 26.524          | 96.92      | 1.24         | 3.54   |
| 2     | 39.140          | 2639.48    | 16.47        | 96.46  |
| Total |                 | 2736.40    |              | 100.00 |

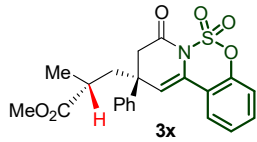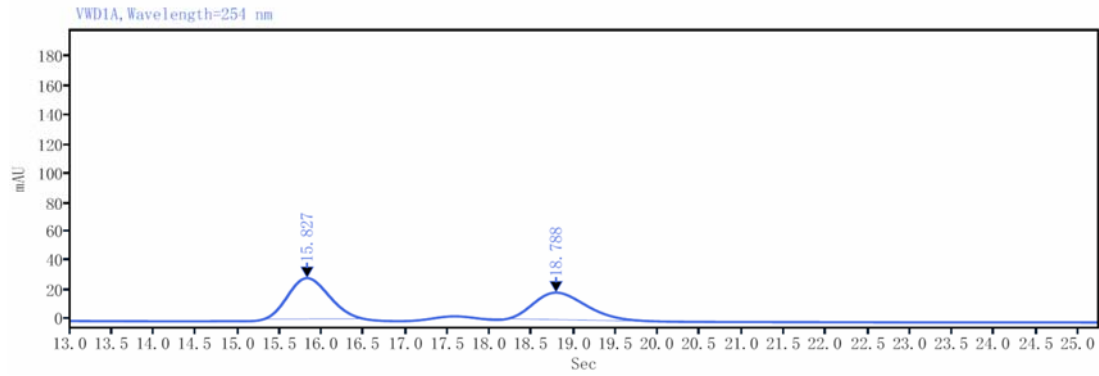

| Peak# | Ret. Time (min) | Area (mAU) | Height (mAU) | Area % |
|-------|-----------------|------------|--------------|--------|
| 1     | 15.827          | 934.71     | 27.81        | 54.54  |
| 2     | 18.788          | 779.20     | 18.38        | 45.46  |
| Total |                 | 1713.91    |              | 100.00 |

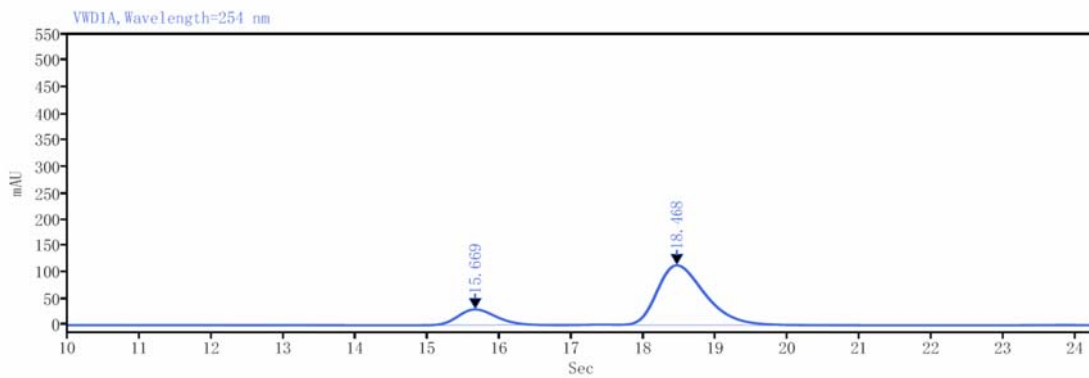

| Peak# | Ret. Time (min) | Area (mAU) | Height (mAU) | Area % |
|-------|-----------------|------------|--------------|--------|
| 1     | 15.669          | 1075.22    | 29.66        | 17.06  |
| 2     | 18.468          | 5228.23    | 113.16       | 82.94  |
| Total |                 | 6303.45    |              | 100.00 |

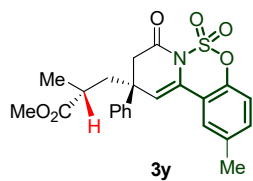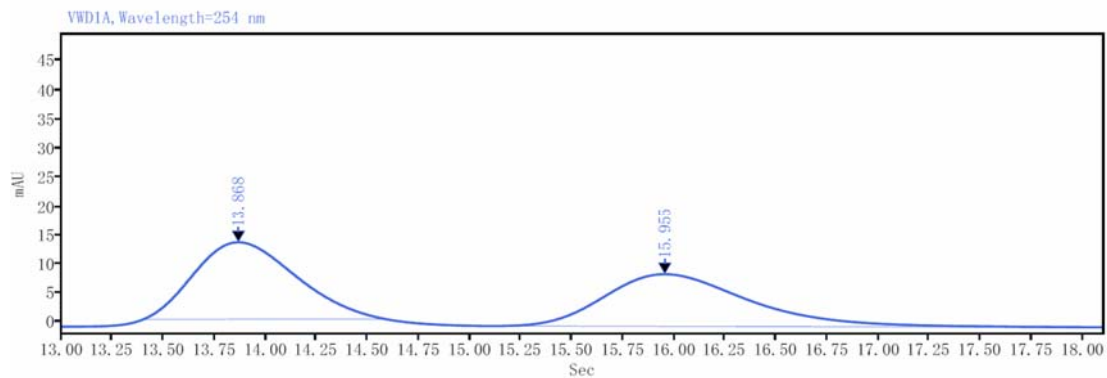

| Peak# | Ret. Time (min) | Area (mAU) | Height (mAU) | Area % |
|-------|-----------------|------------|--------------|--------|
| 1     | 13.868          | 456.68     | 13.22        | 50.87  |
| 2     | 15.955          | 441.08     | 8.95         | 49.13  |
| Total |                 | 897.76     |              | 100.00 |

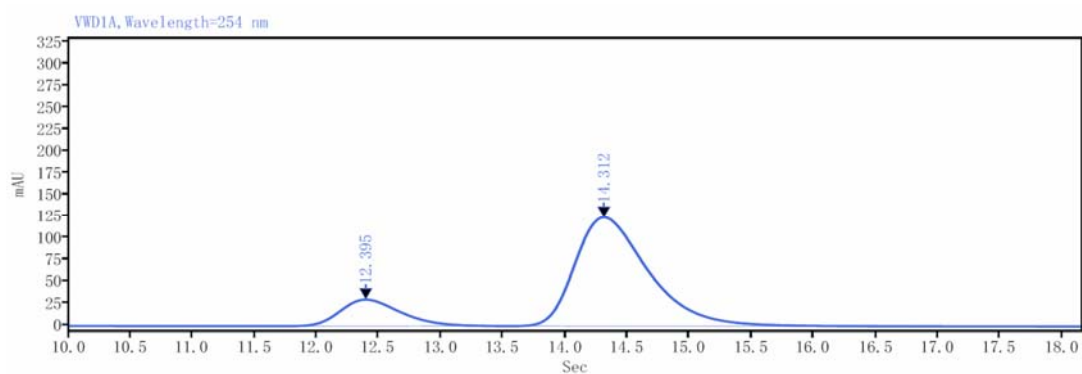

| Peak# | Ret. Time (min) | Area (mAU) | Height (mAU) | Area % |
|-------|-----------------|------------|--------------|--------|
| 1     | 12.395          | 1021.14    | 30.25        | 16.62  |
| 2     | 14.312          | 5121.88    | 124.44       | 83.38  |
| Total |                 | 6143.03    |              | 100.00 |

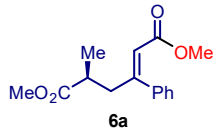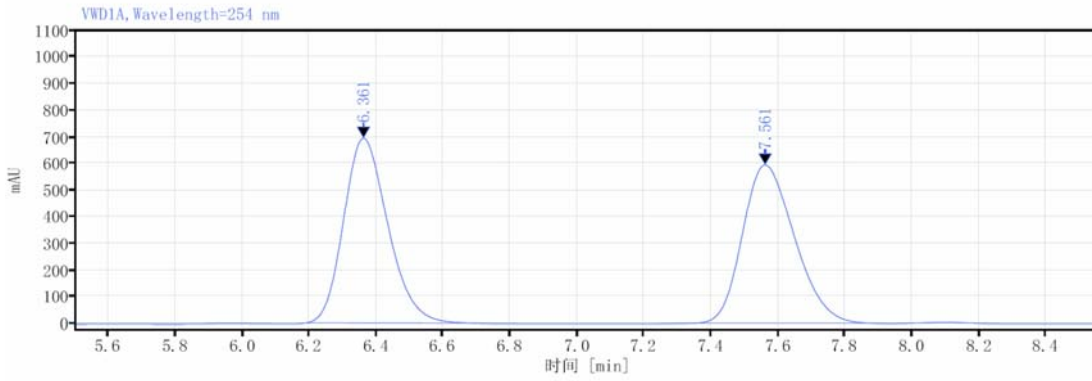

| Peak# | Ret. Time (min) | Area (mAU) | Height (mAU) | Area % |
|-------|-----------------|------------|--------------|--------|
| 1     | 6.361           | 6353.01    | 693.84       | 49.87  |
| 2     | 7.561           | 6385.09    | 594.49       | 50.13  |
| Total |                 | 12738.10   |              | 100.00 |

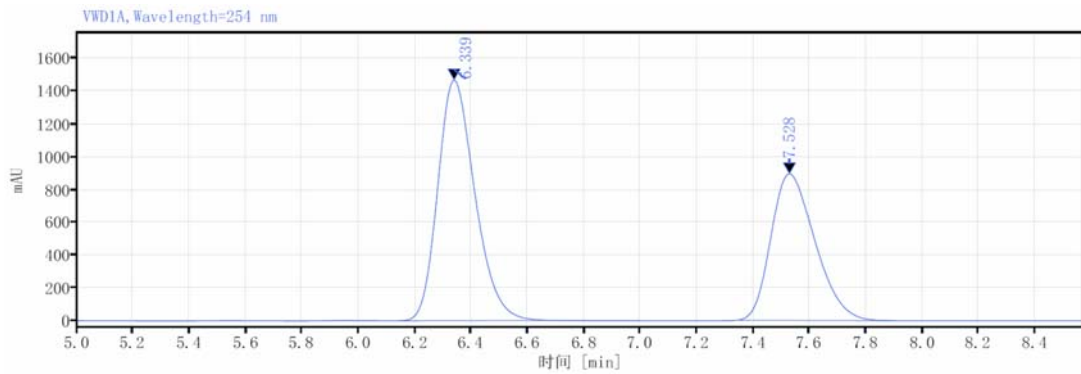

| Peak# | Ret. Time (min) | Area (mAU) | Height (mAU) | Area % |
|-------|-----------------|------------|--------------|--------|
| 1     | 6.339           | 13463.15   | 1467.64      | 58.00  |
| 2     | 7.528           | 9748.95    | 899.91       | 42.00  |
| Total |                 | 23212.11   |              | 100.00 |

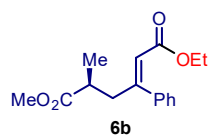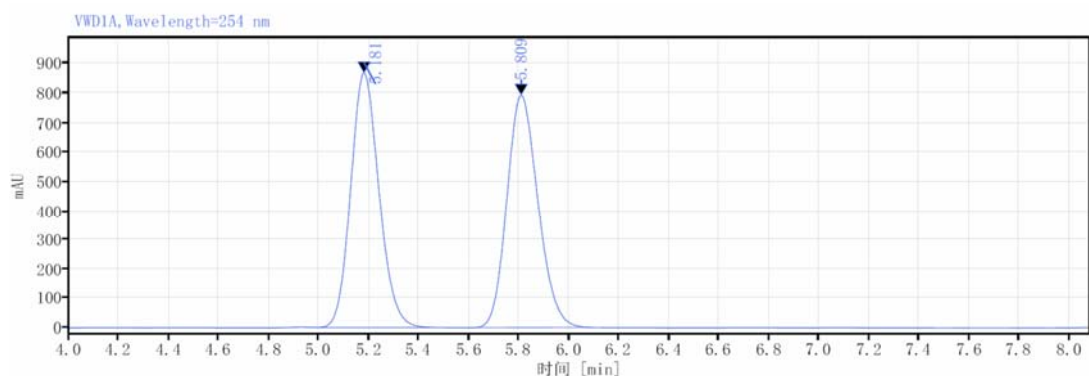

| Peak# | Ret. Time (min) | Area (mAU) | Height (mAU) | Area % |
|-------|-----------------|------------|--------------|--------|
| 1     | 5.181           | 6821.64    | 866.49       | 49.81  |
| 2     | 5.809           | 6874.50    | 792.05       | 50.19  |
| Total |                 | 13696.14   |              | 100.00 |

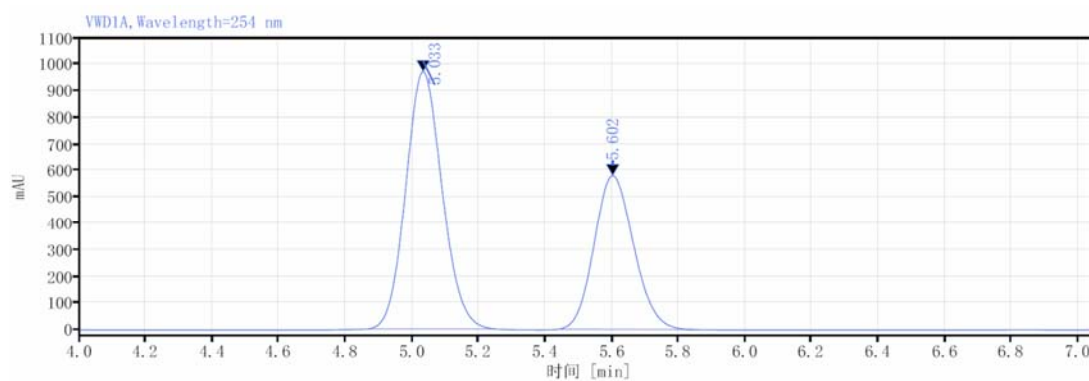

| Peak# | Ret. Time (min) | Area (mAU) | Height (mAU) | Area % |
|-------|-----------------|------------|--------------|--------|
| 1     | 5.033           | 7357.32    | 968.46       | 60.69  |
| 2     | 5.602           | 4766.00    | 580.07       | 39.31  |
| Total |                 | 12123.32   |              | 100.00 |

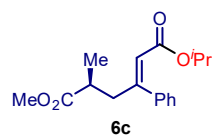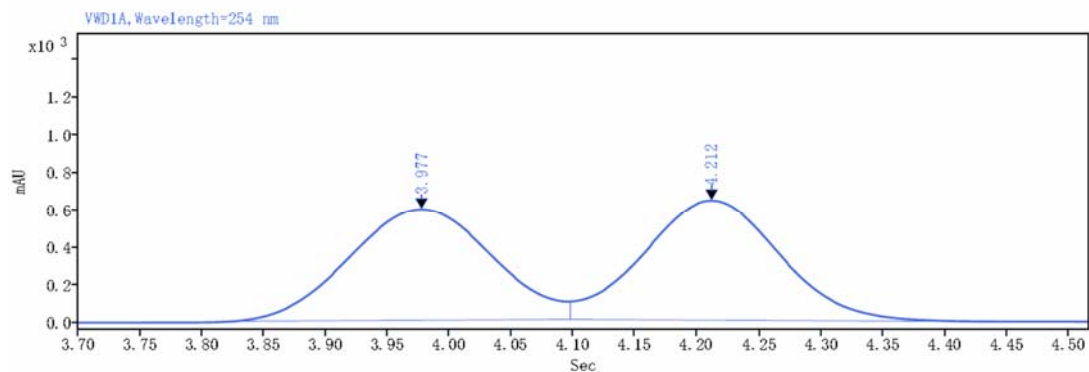

| Peak# | Ret. Time (min) | Area (mAU) | Height (mAU) | Area % |
|-------|-----------------|------------|--------------|--------|
| 1     | 3.977           | 4759.20    | 593.52       | 49.37  |
| 2     | 4.212           | 4881.26    | 640.01       | 50.63  |
| Total |                 | 9640.46    |              | 100.00 |

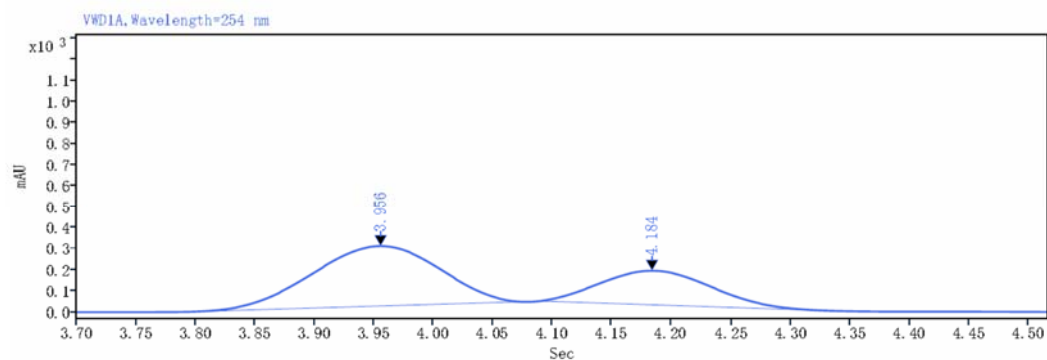

| Peak# | Ret. Time (min) | Area (mAU) | Height (mAU) | Area % |
|-------|-----------------|------------|--------------|--------|
| 1     | 3.956           | 2088.27    | 282.64       | 66.79  |
| 2     | 4.184           | 1038.31    | 160.73       | 33.21  |
| Total |                 | 3126.58    |              | 100.00 |

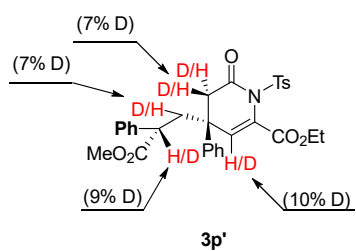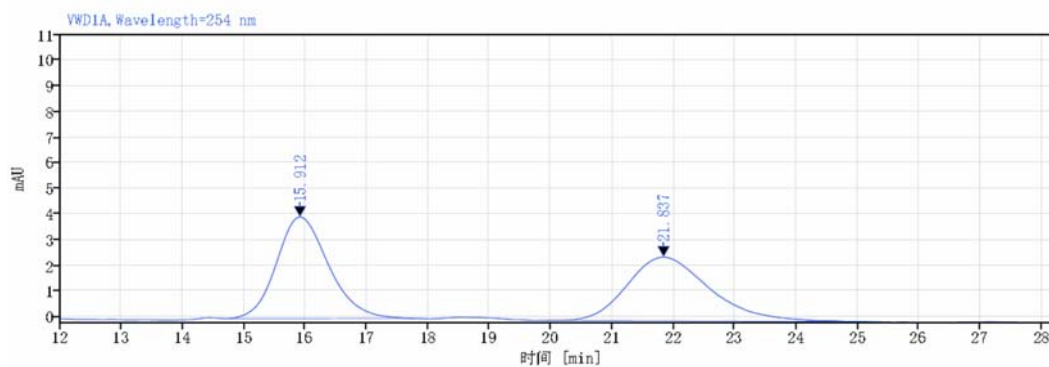

| Peak# | Ret. Time (min) | Area (mAU) | Height (mAU) | Area % |
|-------|-----------------|------------|--------------|--------|
| 1     | 15.912          | 231.47     | 3.93         | 50.35  |
| 2     | 21.837          | 228.25     | 2.46         | 49.65  |
| Total |                 | 459.73     |              | 100.00 |

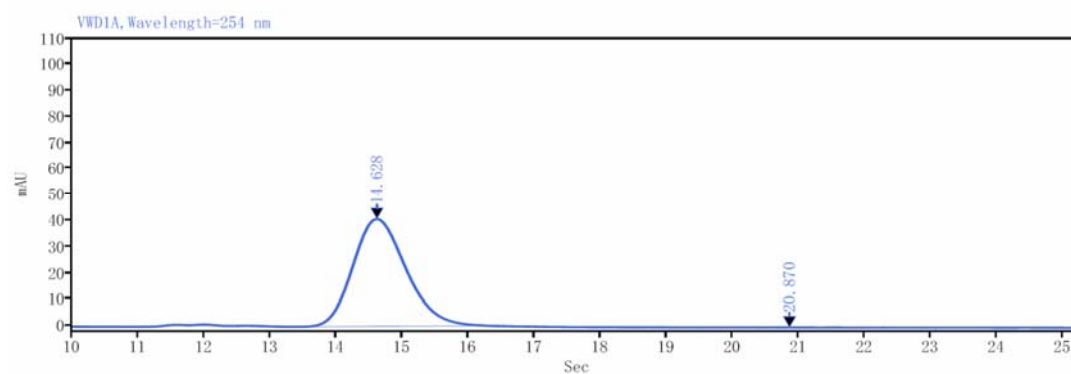

| Peak# | Ret. Time (min) | Area (mAU) | Height (mAU) | Area % |
|-------|-----------------|------------|--------------|--------|
| 1     | 14.728          | 3184.70    | 58.48        | 99.98  |
| 2     | 20.751          | 0.53       | 0.02         | 0.02   |
| Total |                 | 3185.23    |              | 100.00 |





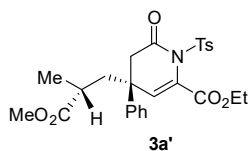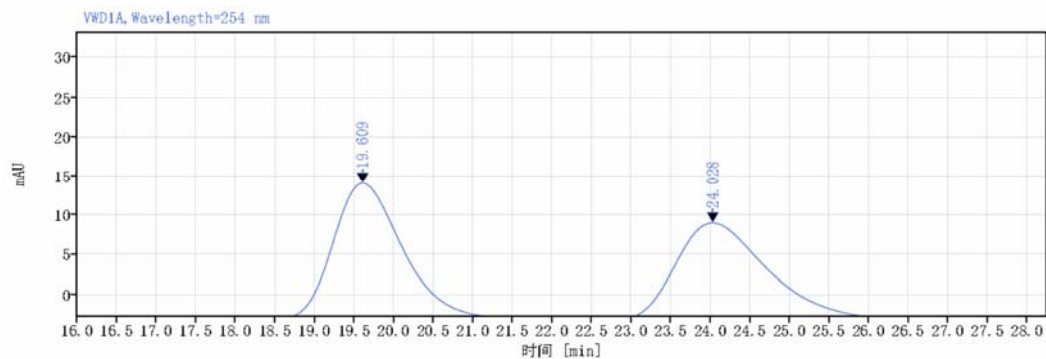

| Peak# | Ret. Time (min) | Area (mAU) | Height (mAU) | Area % |
|-------|-----------------|------------|--------------|--------|
| 1     | 19.609          | 1064.77    | 17.24        | 50.11  |
| 2     | 24.028          | 1060.19    | 12.43        | 49.89  |
| Total |                 | 2124.95    |              | 100.00 |

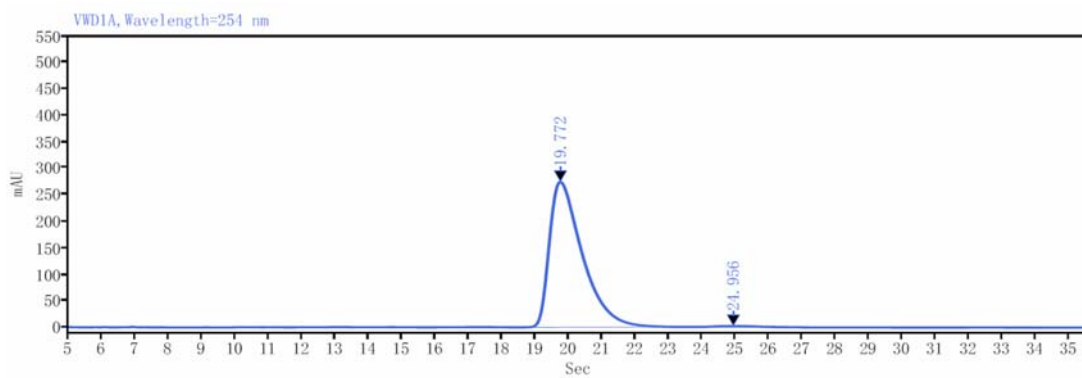

| Peak# | Ret. Time (min) | Area (mAU) | Height (mAU) | Area % |
|-------|-----------------|------------|--------------|--------|
| 1     | 19.772          | 18838.86   | 273.82       | 99.01  |
| 2     | 24.956          | 188.28     | 2.11         | 0.99   |
| Total |                 | 19027.14   |              | 100.00 |

## Part 6: <sup>1</sup>HNMR and <sup>13</sup>CNMR spectra

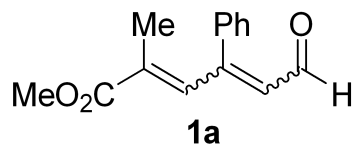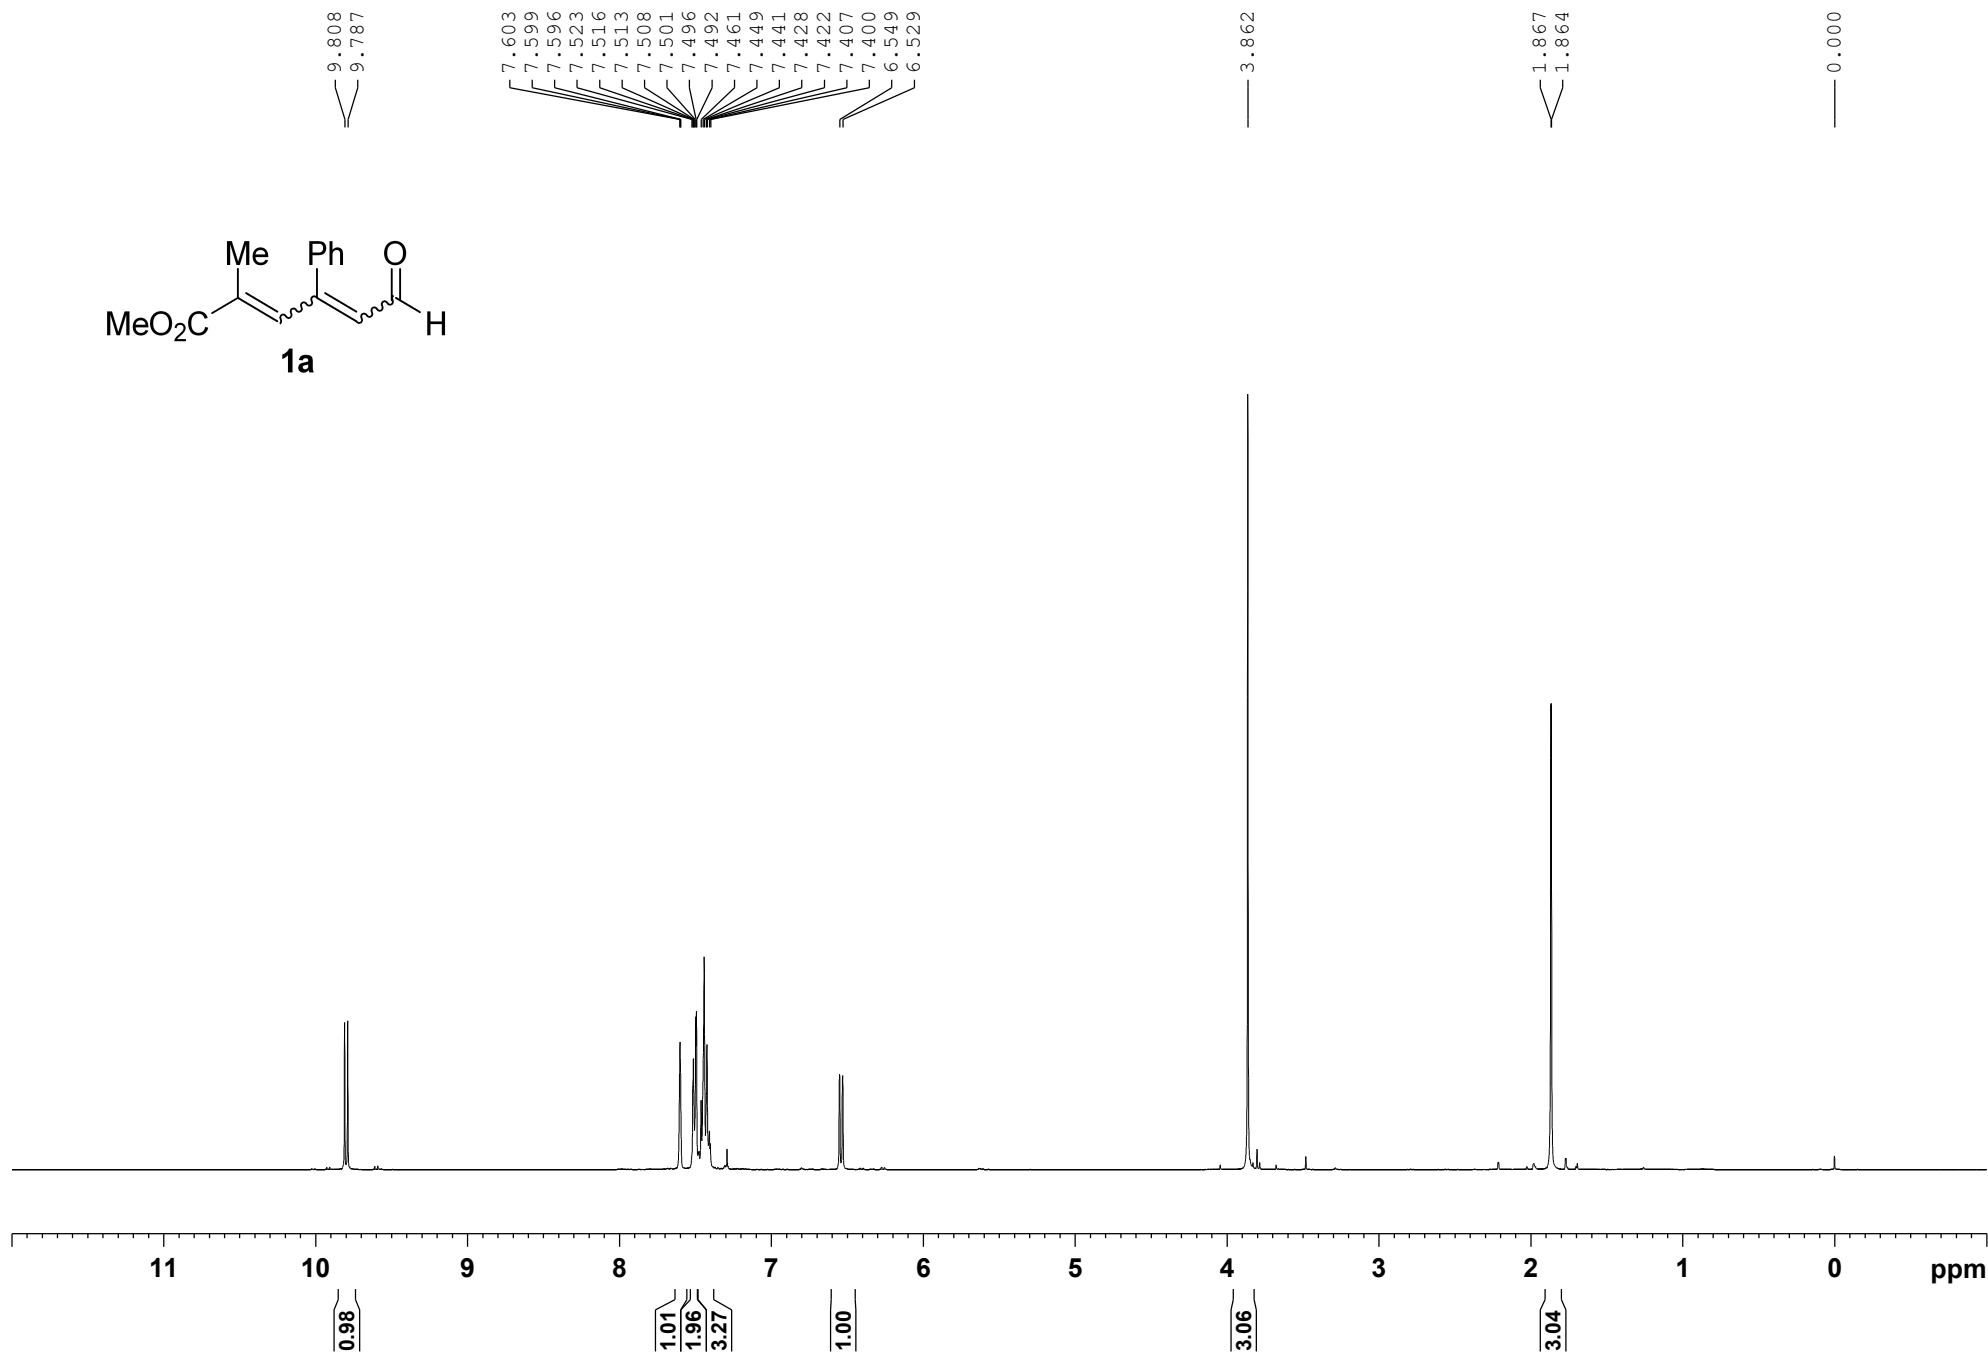

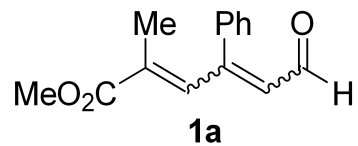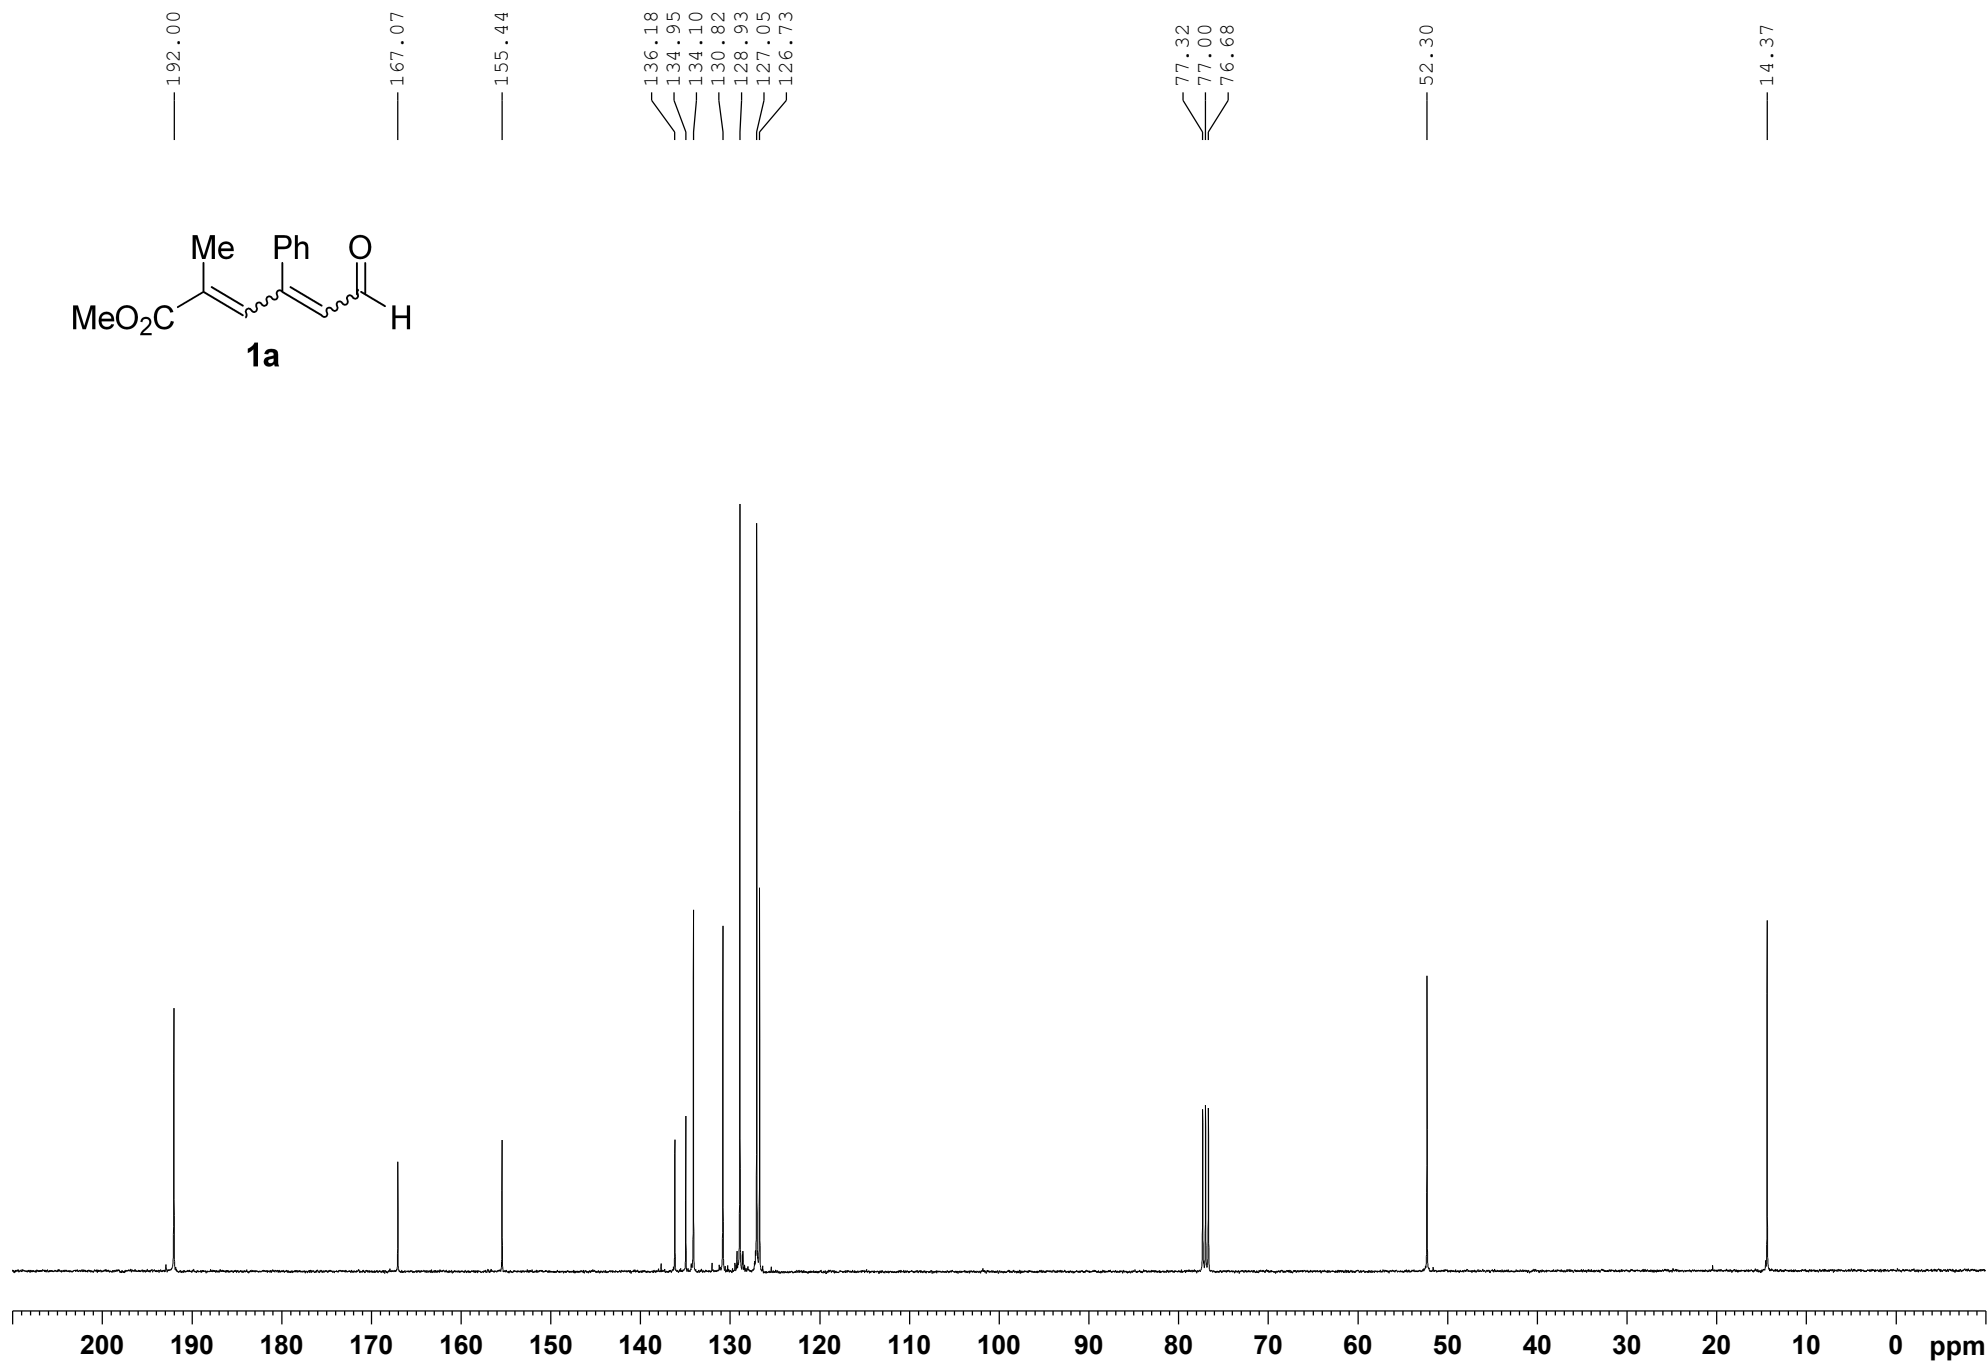

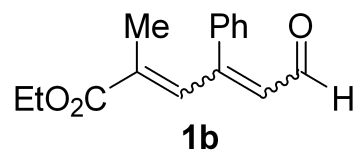

9.815  
9.794

7.585  
7.515  
7.511  
7.507  
7.496  
7.492  
7.462  
7.455  
7.450  
7.442  
7.423  
7.412  
7.410  
7.402  
6.543  
6.522

4.338  
4.320  
4.302  
4.285

1.863  
1.860  
1.385  
1.367  
1.349

0.000

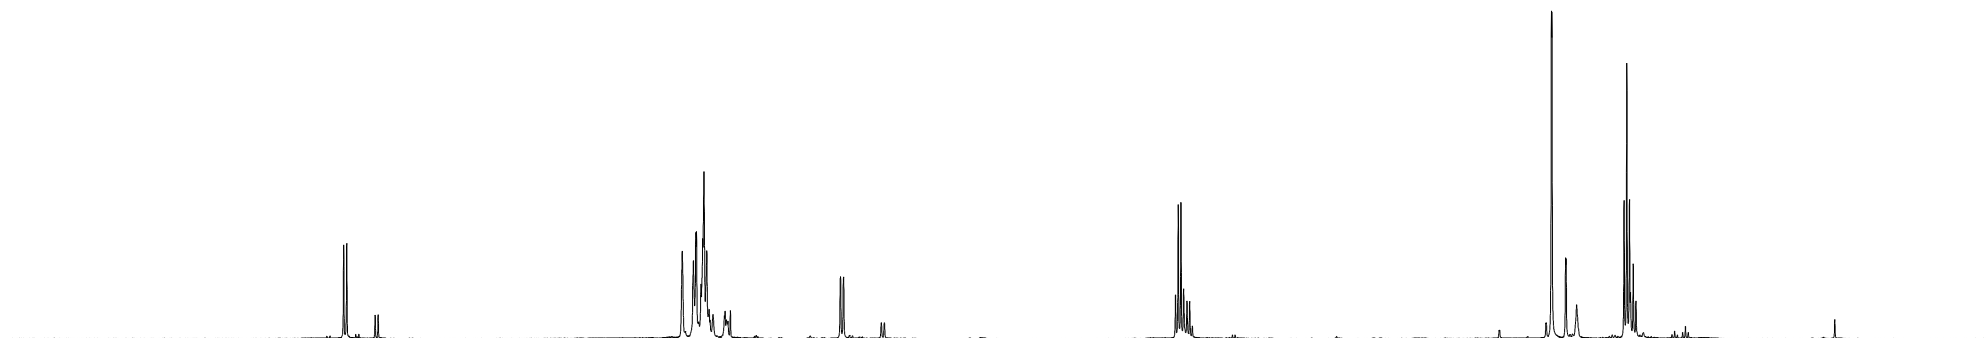

11

10

9

8

7

6

5

4

3

2

1

0

ppm

1.00

1.00  
2.19  
3.52

1.00

2.15

3.08

3.06

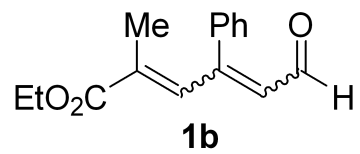

192.19

166.74

155.74

136.47  
135.45  
133.87  
130.89  
129.09  
127.16  
126.84

77.35  
77.02  
76.70

61.42

14.43  
14.18

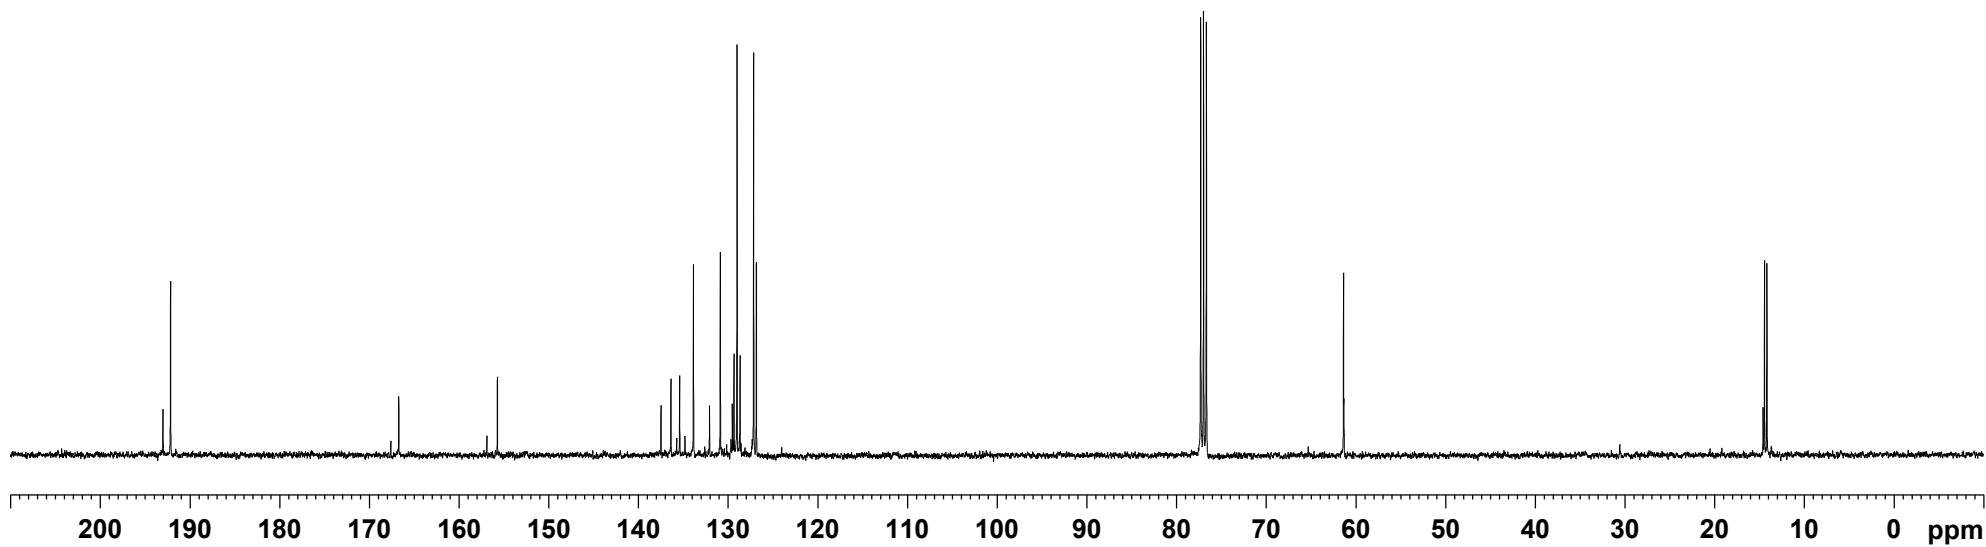

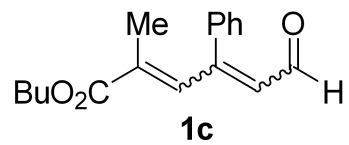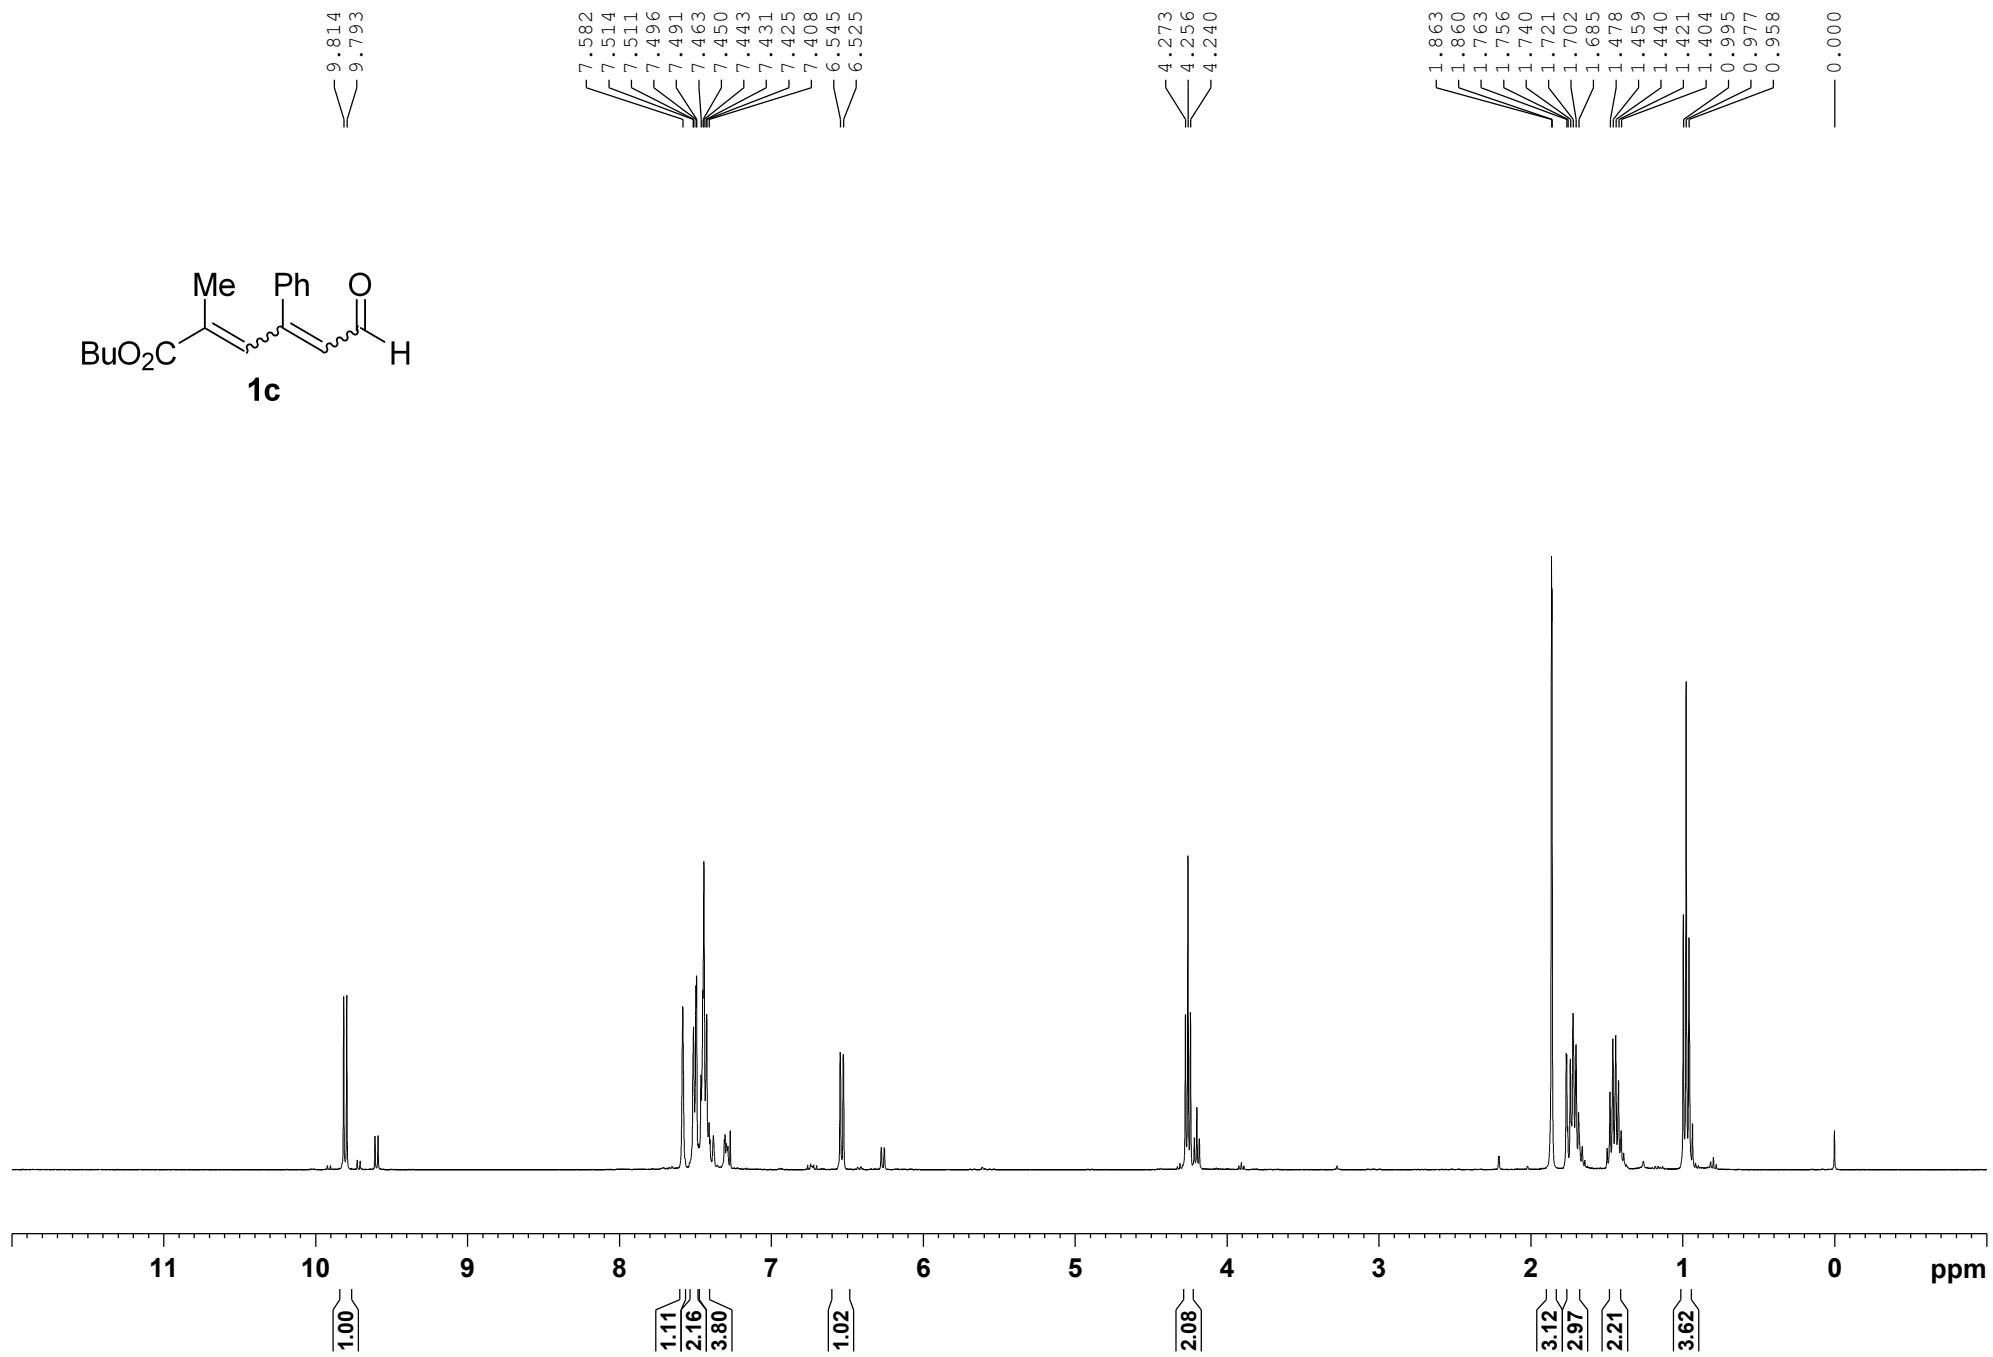

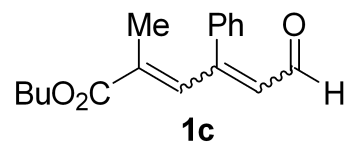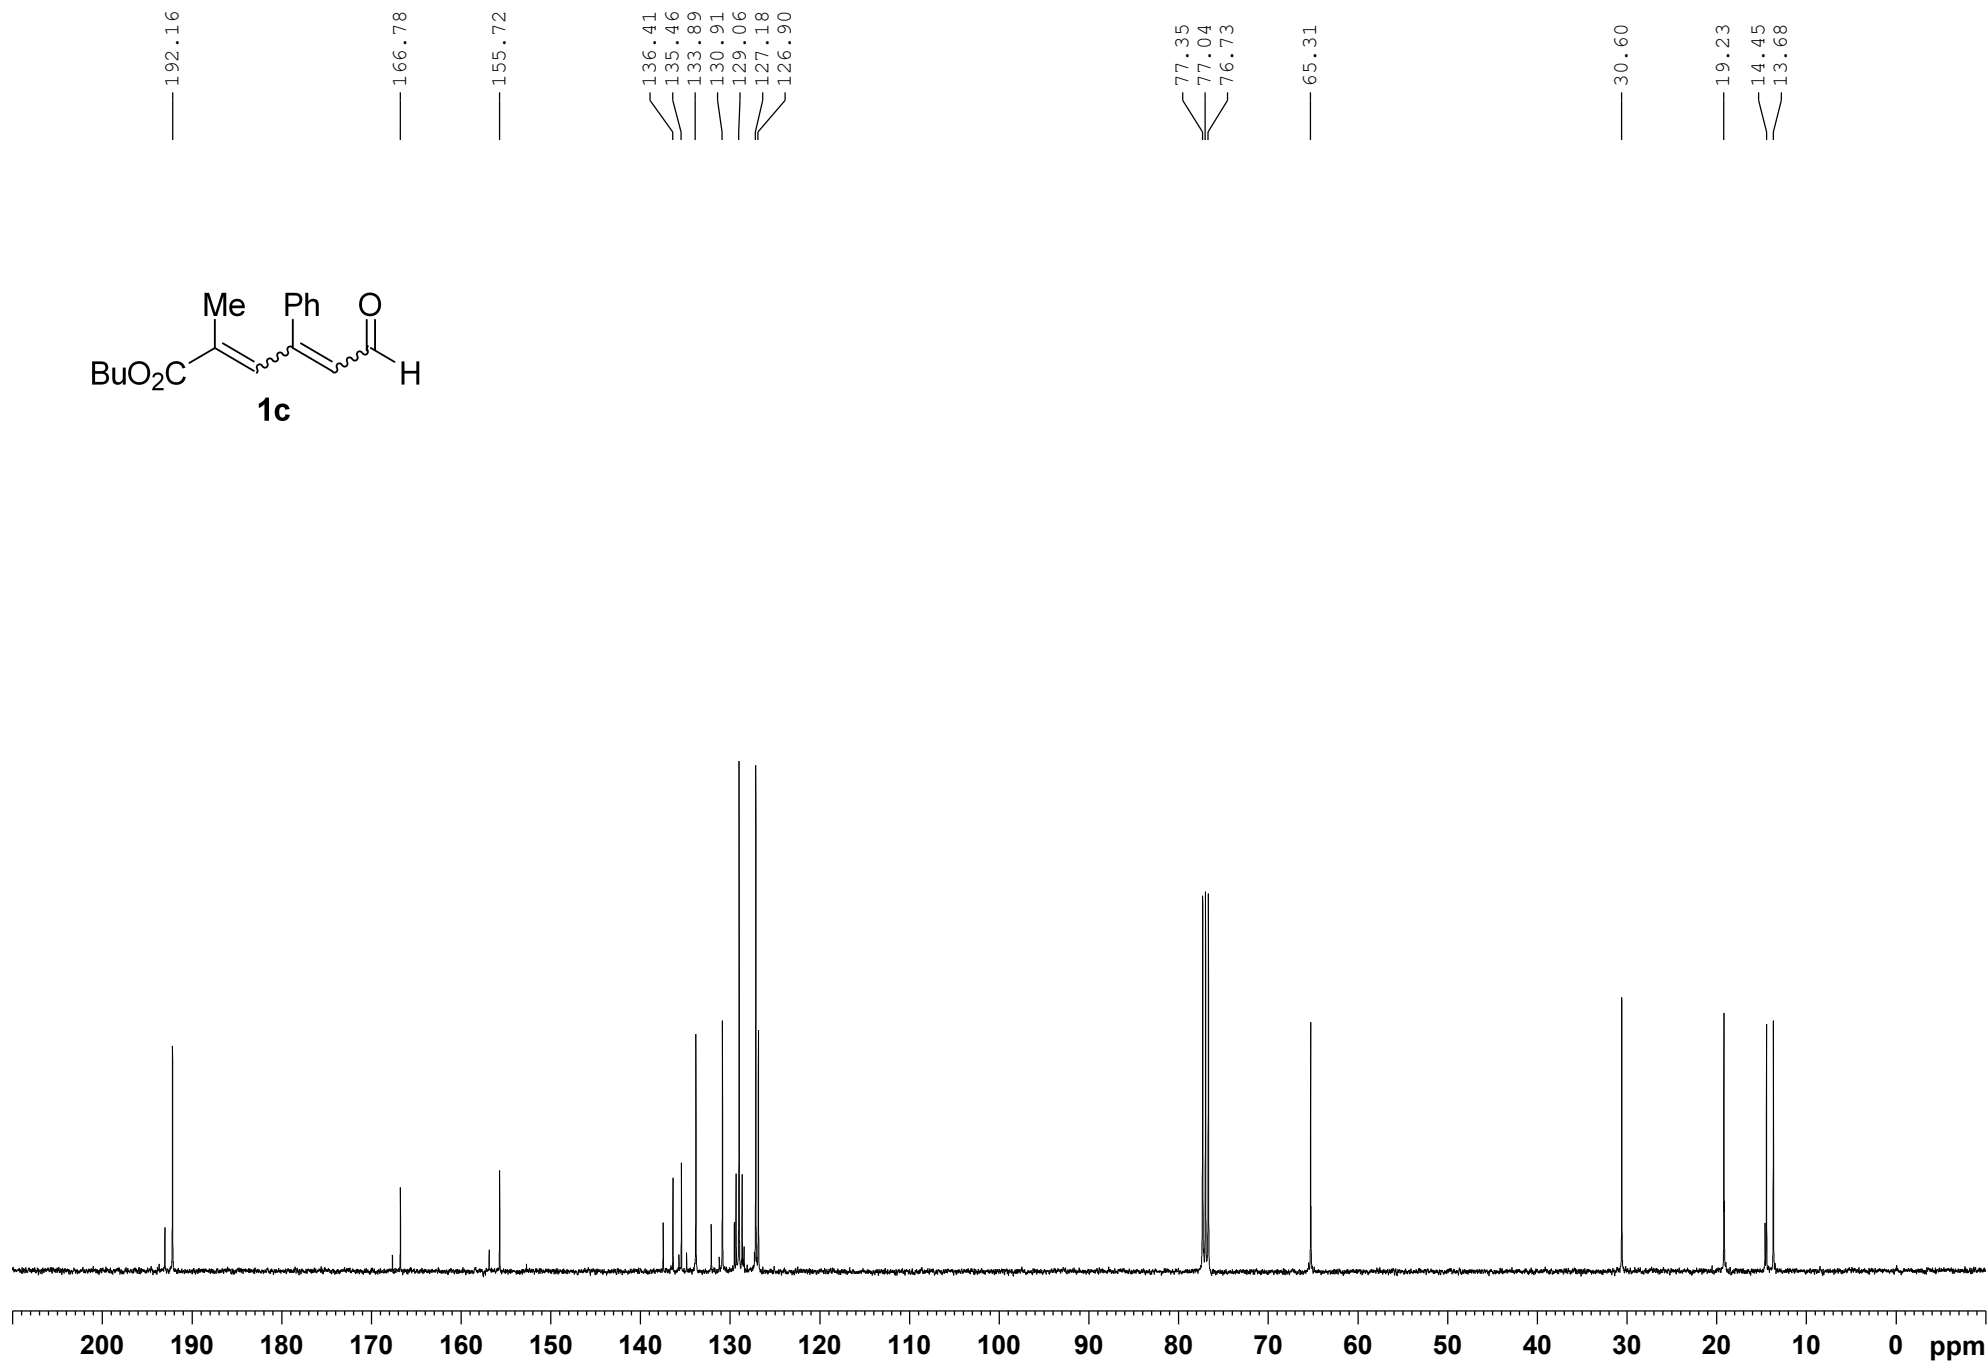



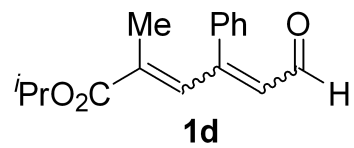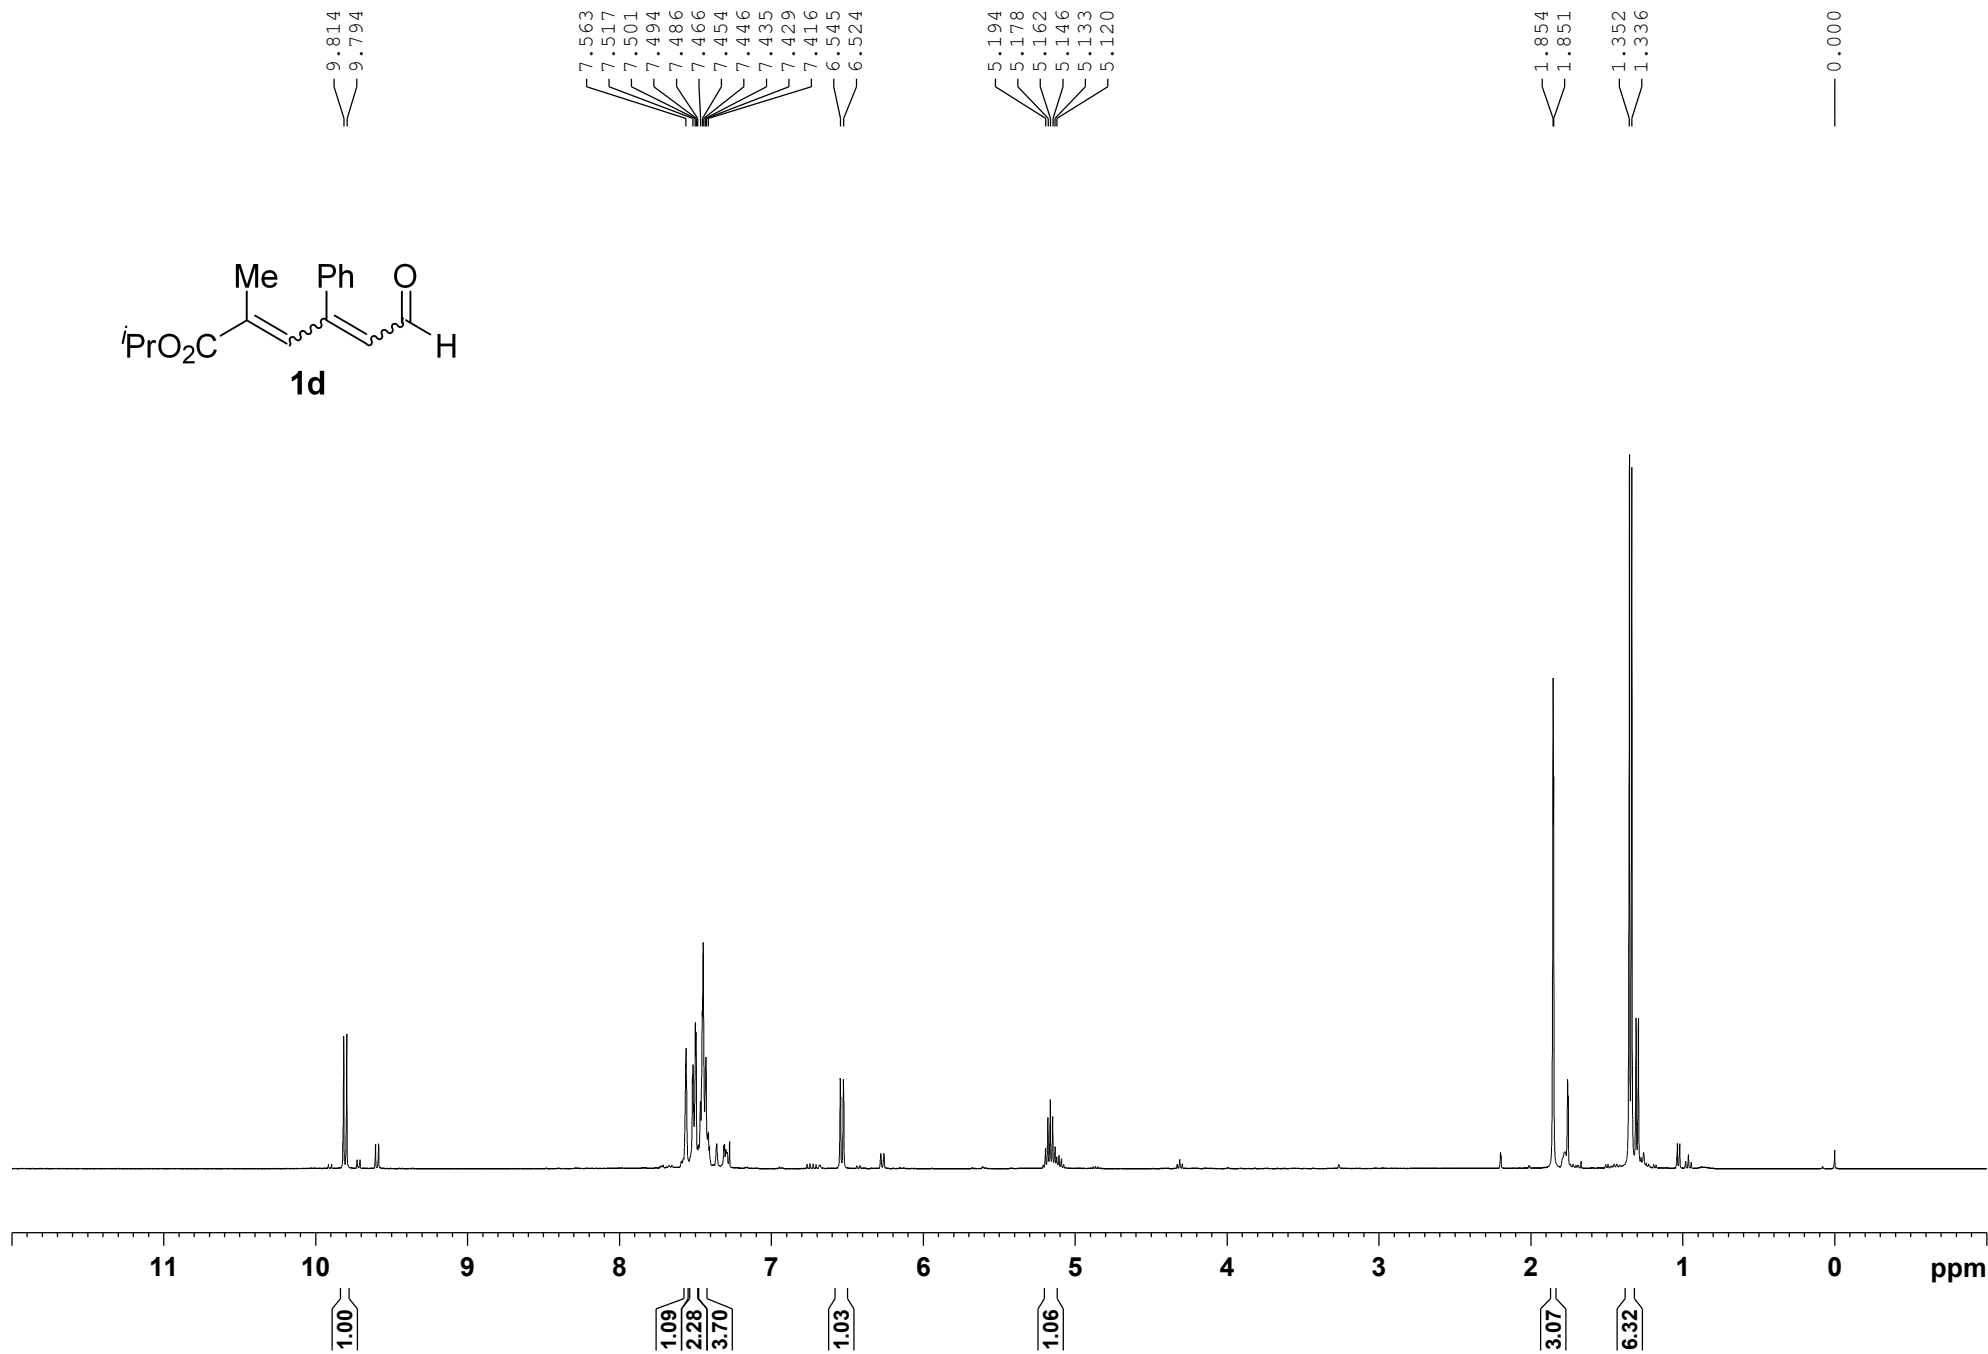

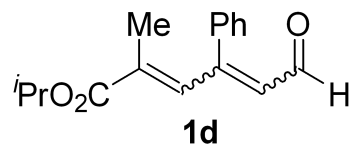

— 192.29

— 166.27

— 155.94

136.45  
135.83  
133.52  
130.90  
129.00  
127.20  
126.79

77.38  
77.00  
76.69

— 68.92

— 21.82

— 14.44

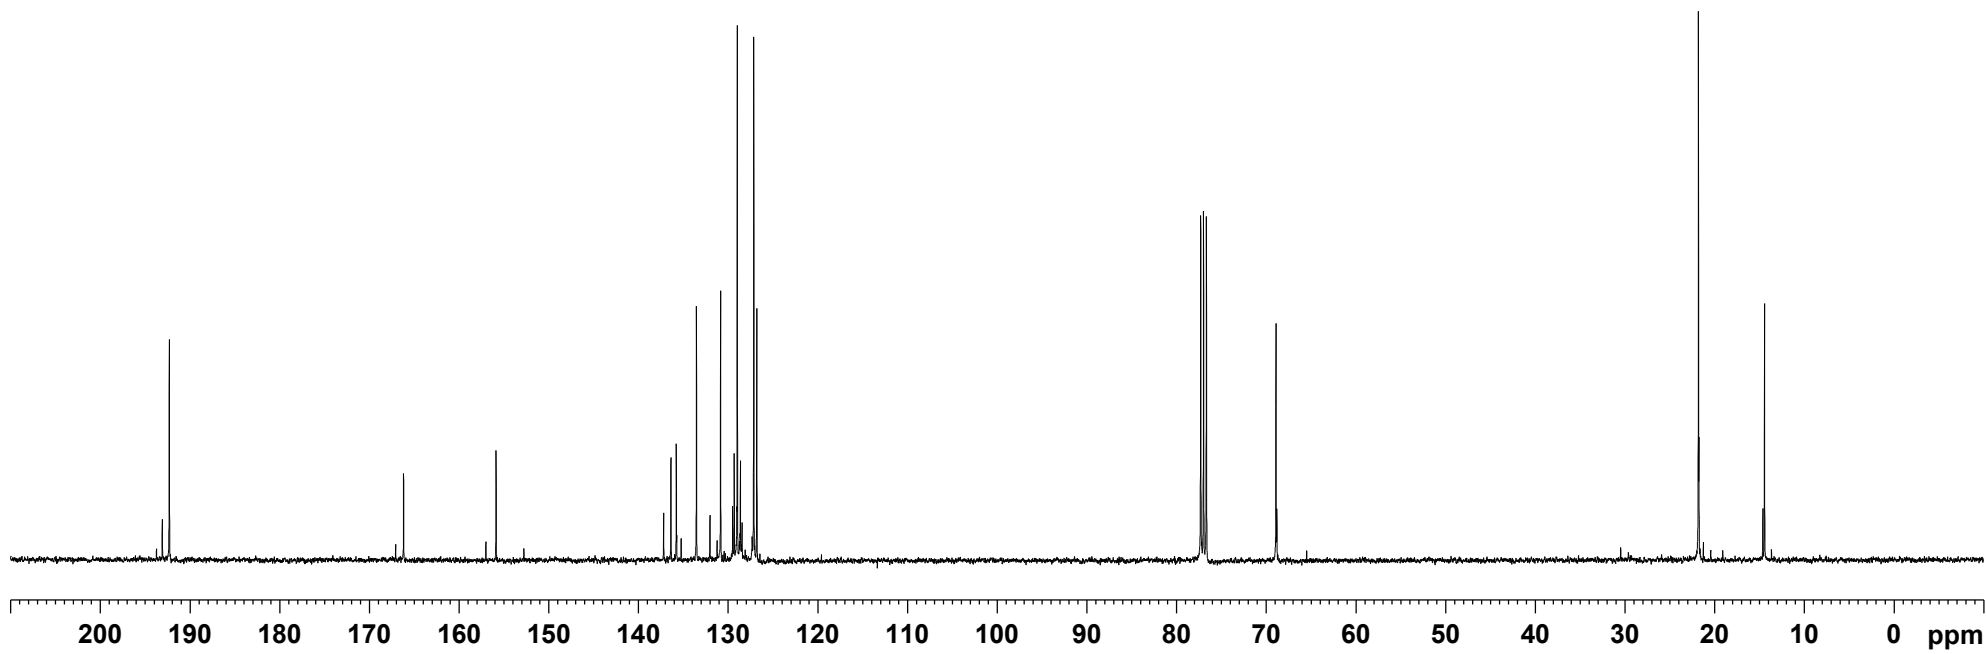

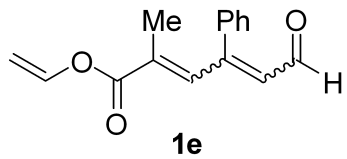

9.829  
9.825  
9.808  
9.805

7.712  
7.514  
7.510  
7.494  
7.474  
7.467  
7.463  
7.457  
7.453  
7.447  
7.439  
7.433  
7.428  
7.417  
7.412  
7.408  
7.396  
7.392  
6.565  
6.545

5.052  
5.017  
4.722  
4.706

1.904

-0.000

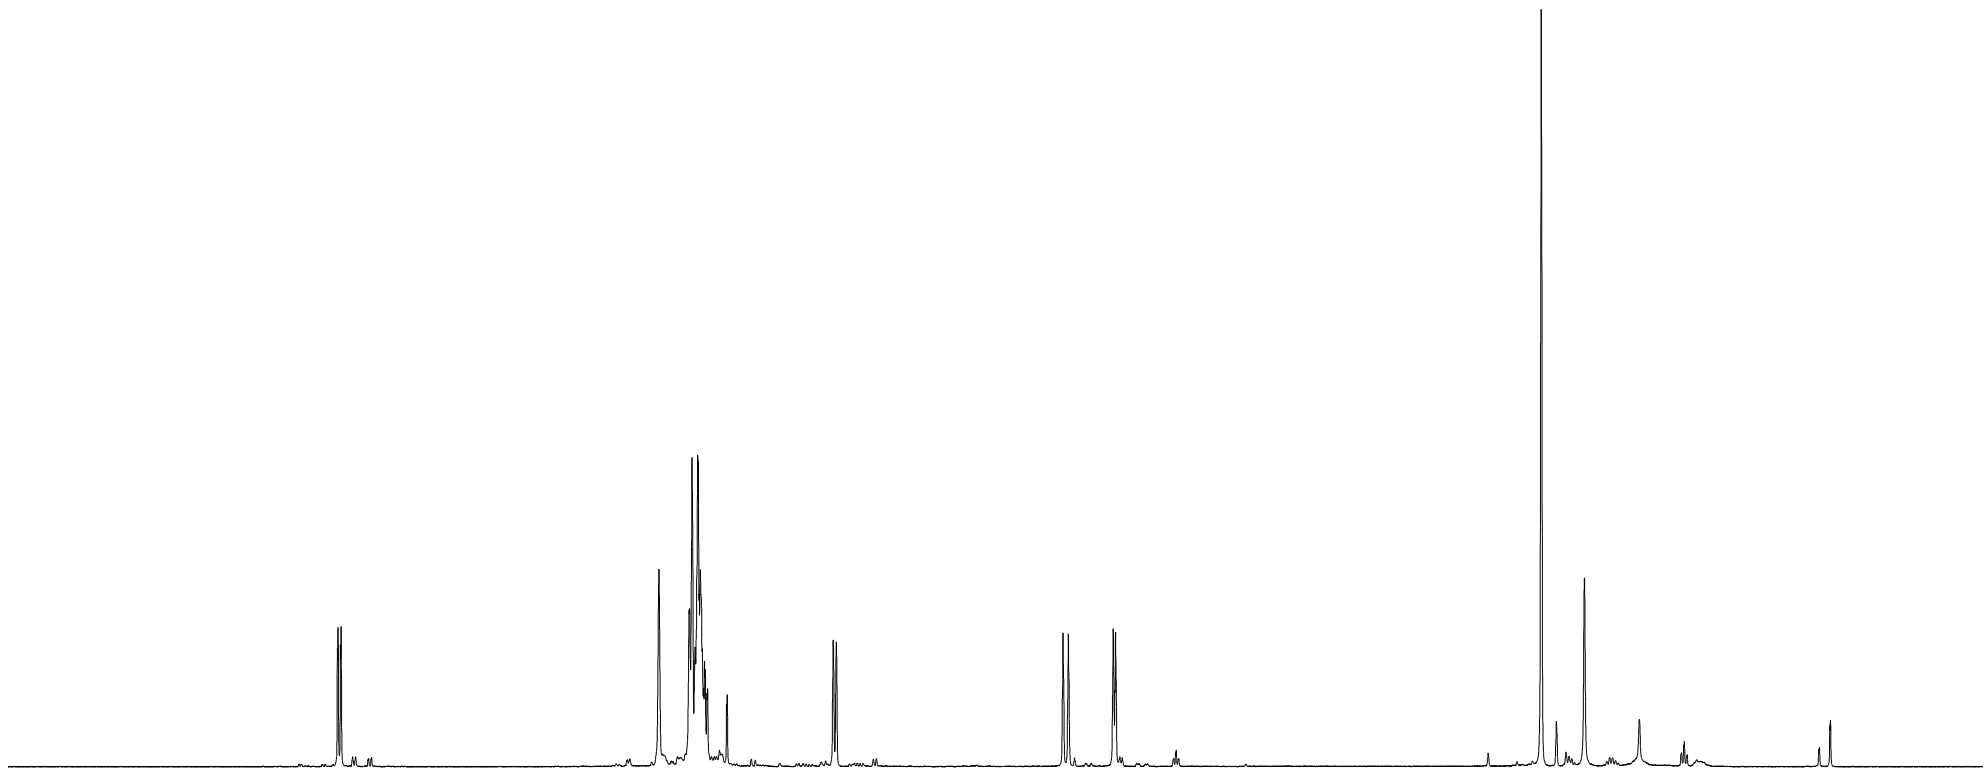

11

10

9

8

7

6

5

4

3

2

1

0

ppm

1.00

1.17

2.40

4.48

1.06

1.09

1.09

3.15

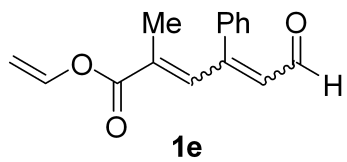

— 191.91

— 163.67

— 155.21

— 141.23

— 136.09

— 135.84

— 134.12

— 131.04

— 129.11

— 127.16

— 126.97

— 98.69

— 77.32

— 77.00

— 76.68

— 14.38

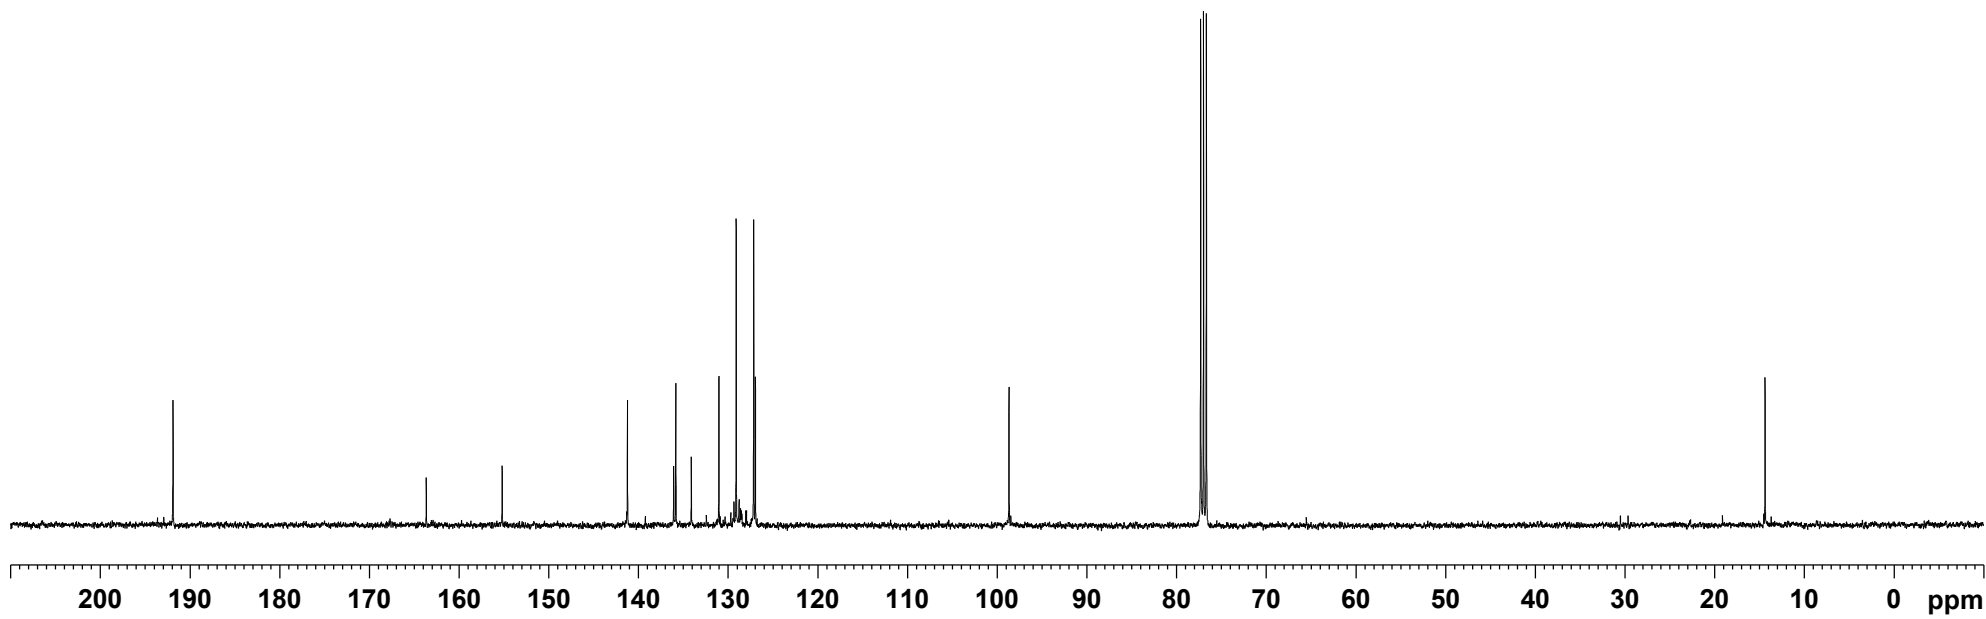

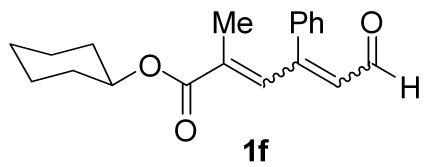

9.817  
9.797

7.574  
7.520  
7.516  
7.512  
7.502  
7.496  
7.463  
7.452  
7.446  
7.428  
7.417  
7.412  
6.546  
6.526

4.974  
4.965  
4.953  
4.942  
4.933  
4.921  
4.911

1.948  
1.937  
1.910  
1.902  
1.864  
1.764  
1.749  
1.598  
1.588  
1.575  
1.567  
1.552  
1.541  
1.519  
1.512  
1.487  
1.477  
1.450  
1.444  
1.428  
1.420  
1.393  
0.000

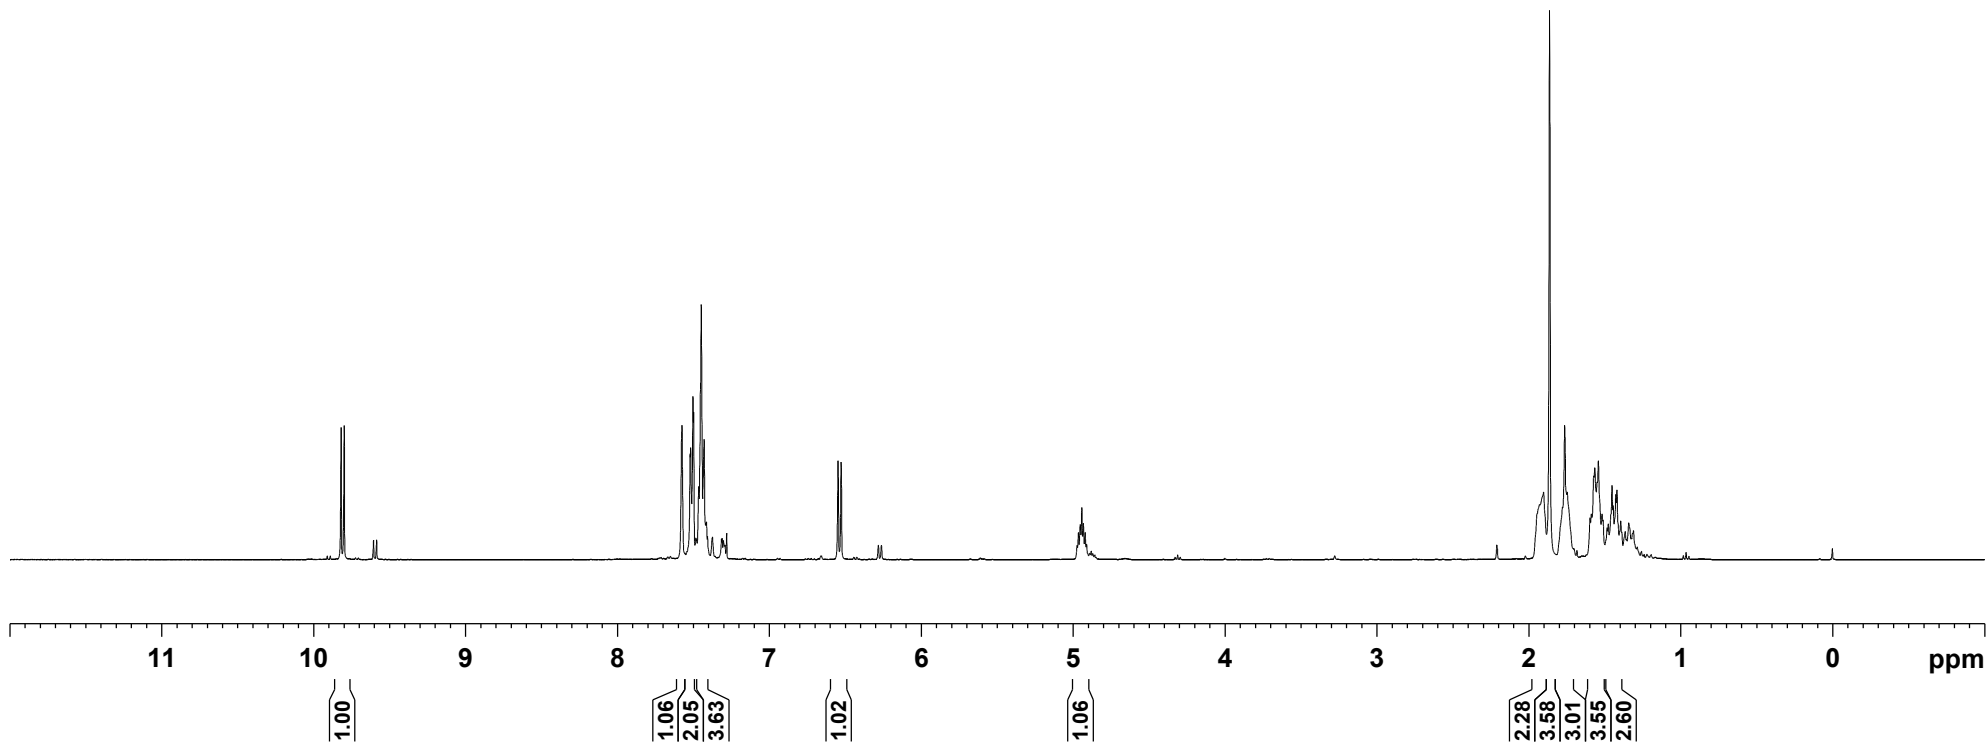

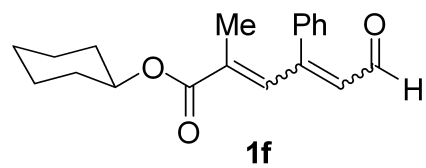

— 192.25

— 166.04

— 155.87

136.37  
135.87  
133.48  
130.82  
128.99  
127.11  
126.80

77.35  
77.01  
76.69  
73.55

— 31.46

25.33  
23.51

— 14.41

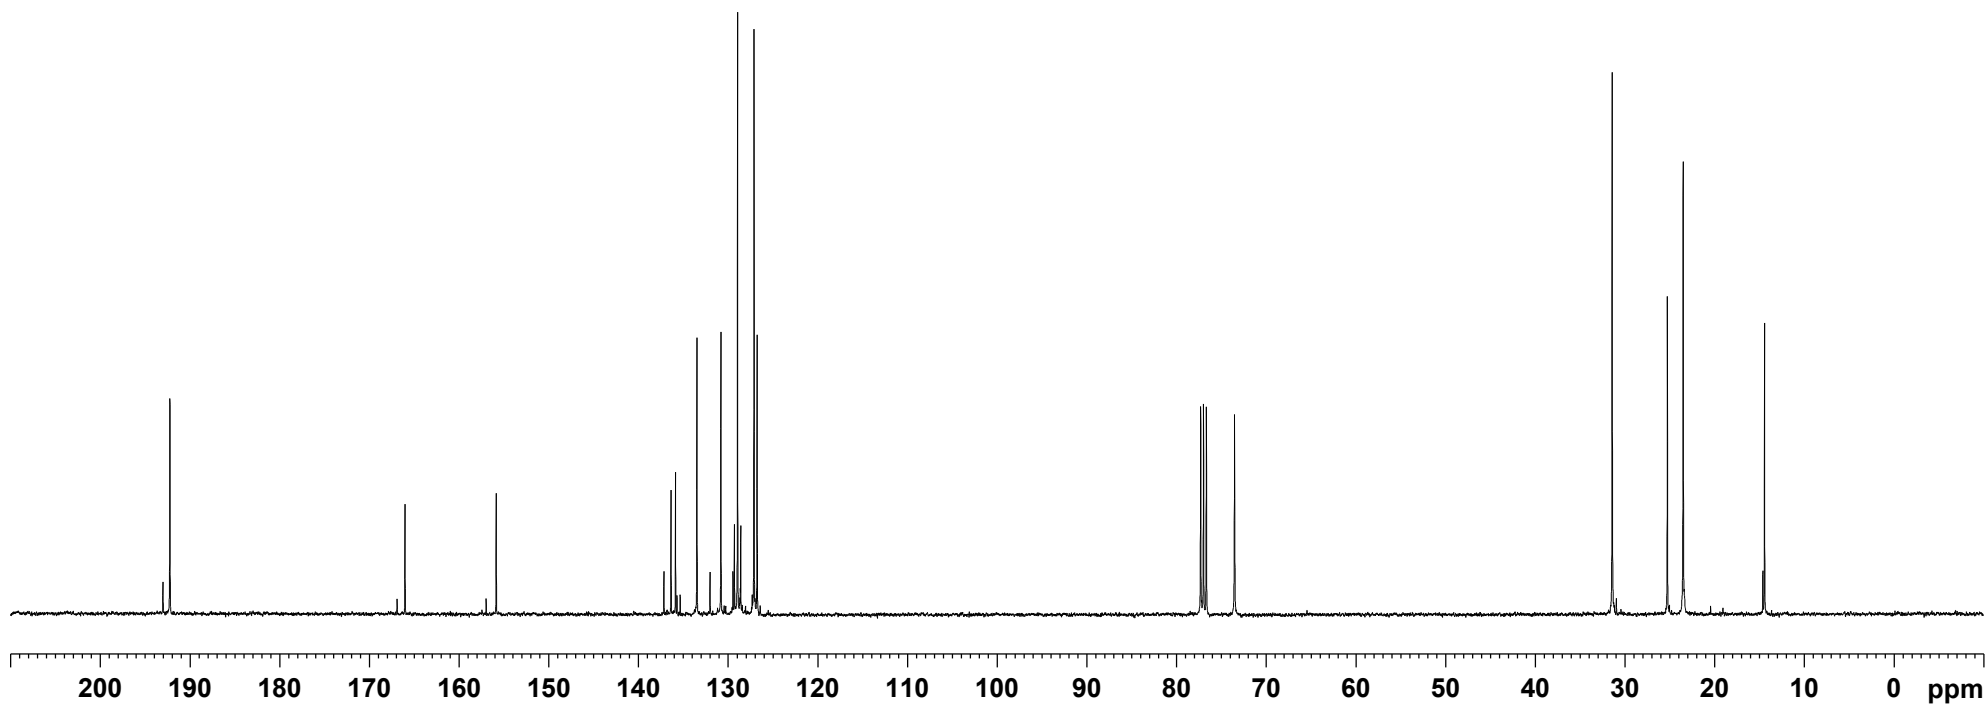

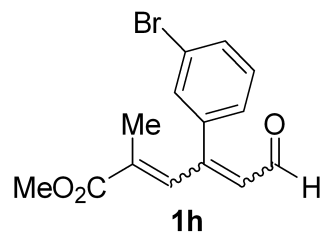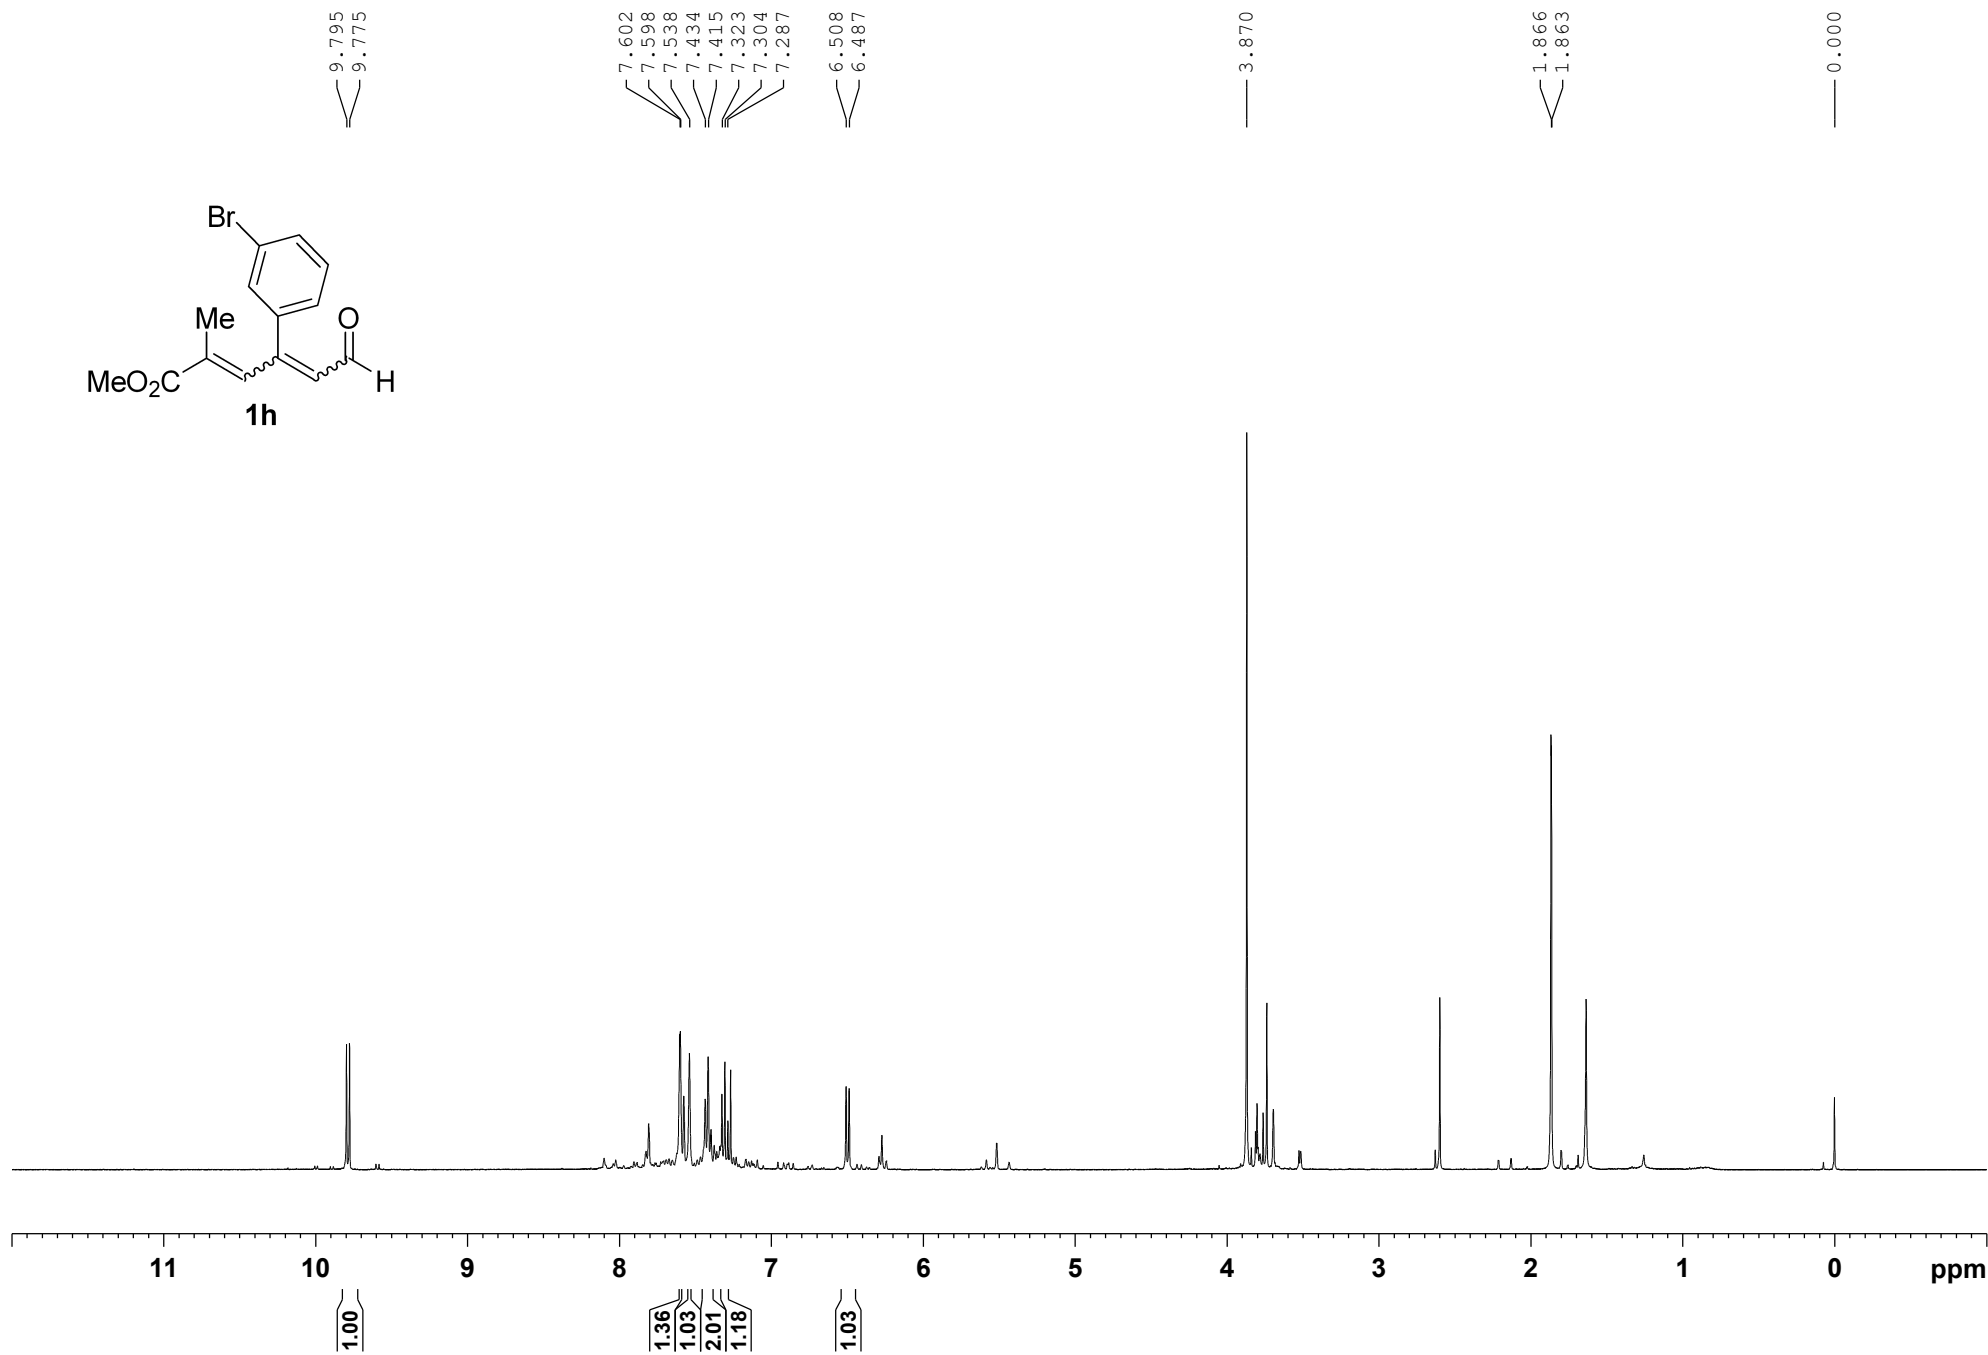

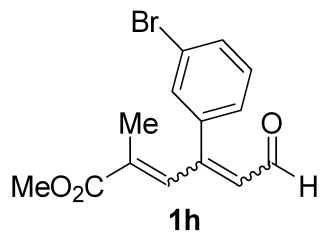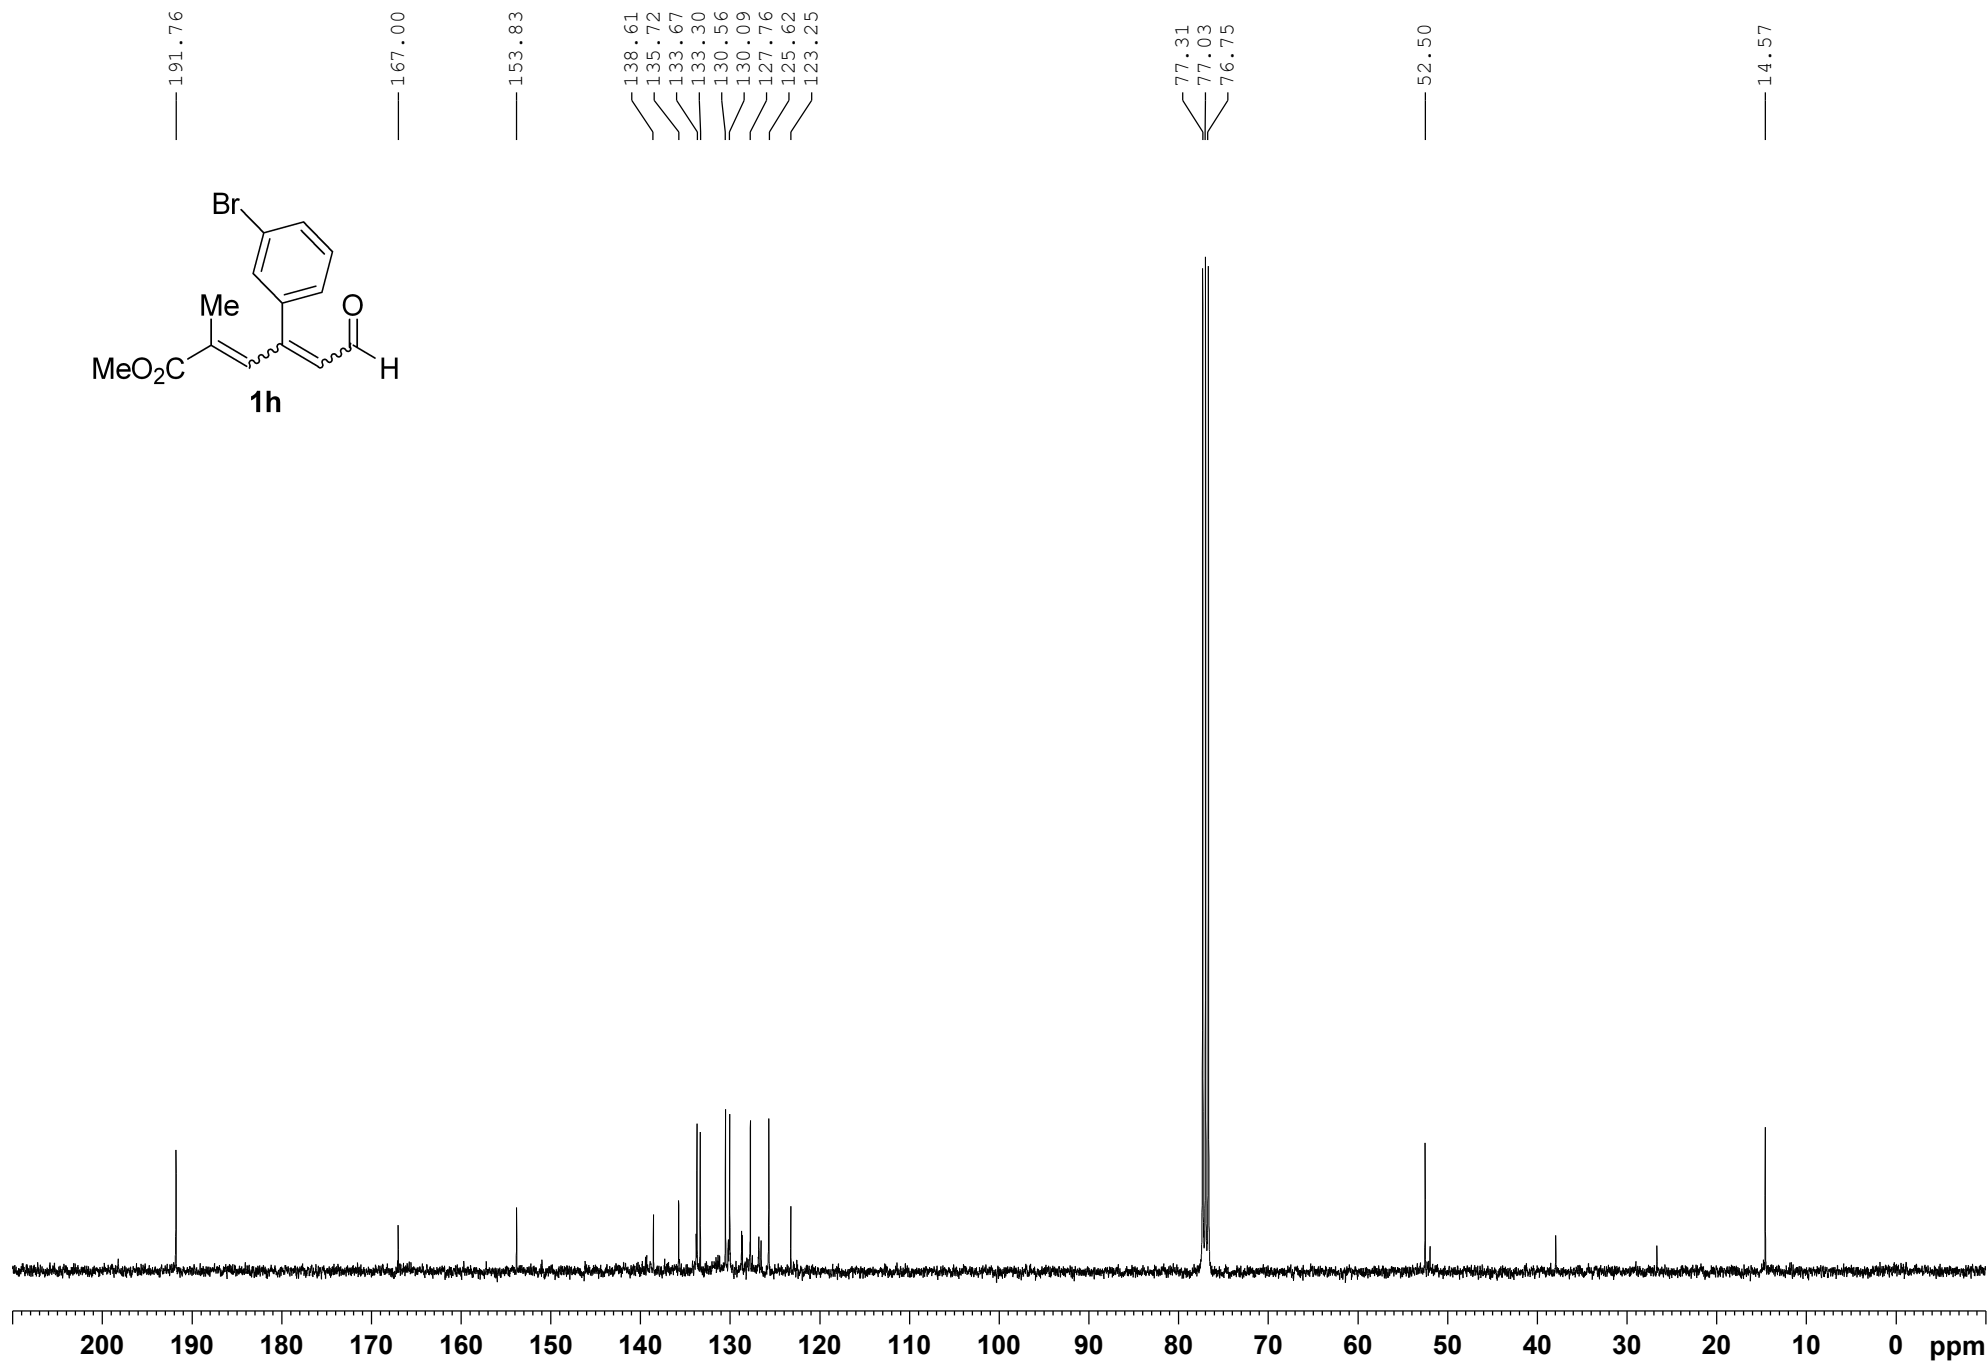



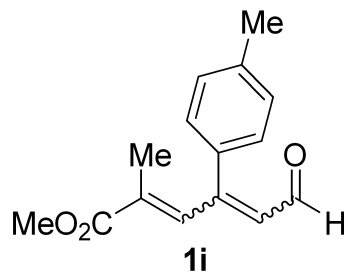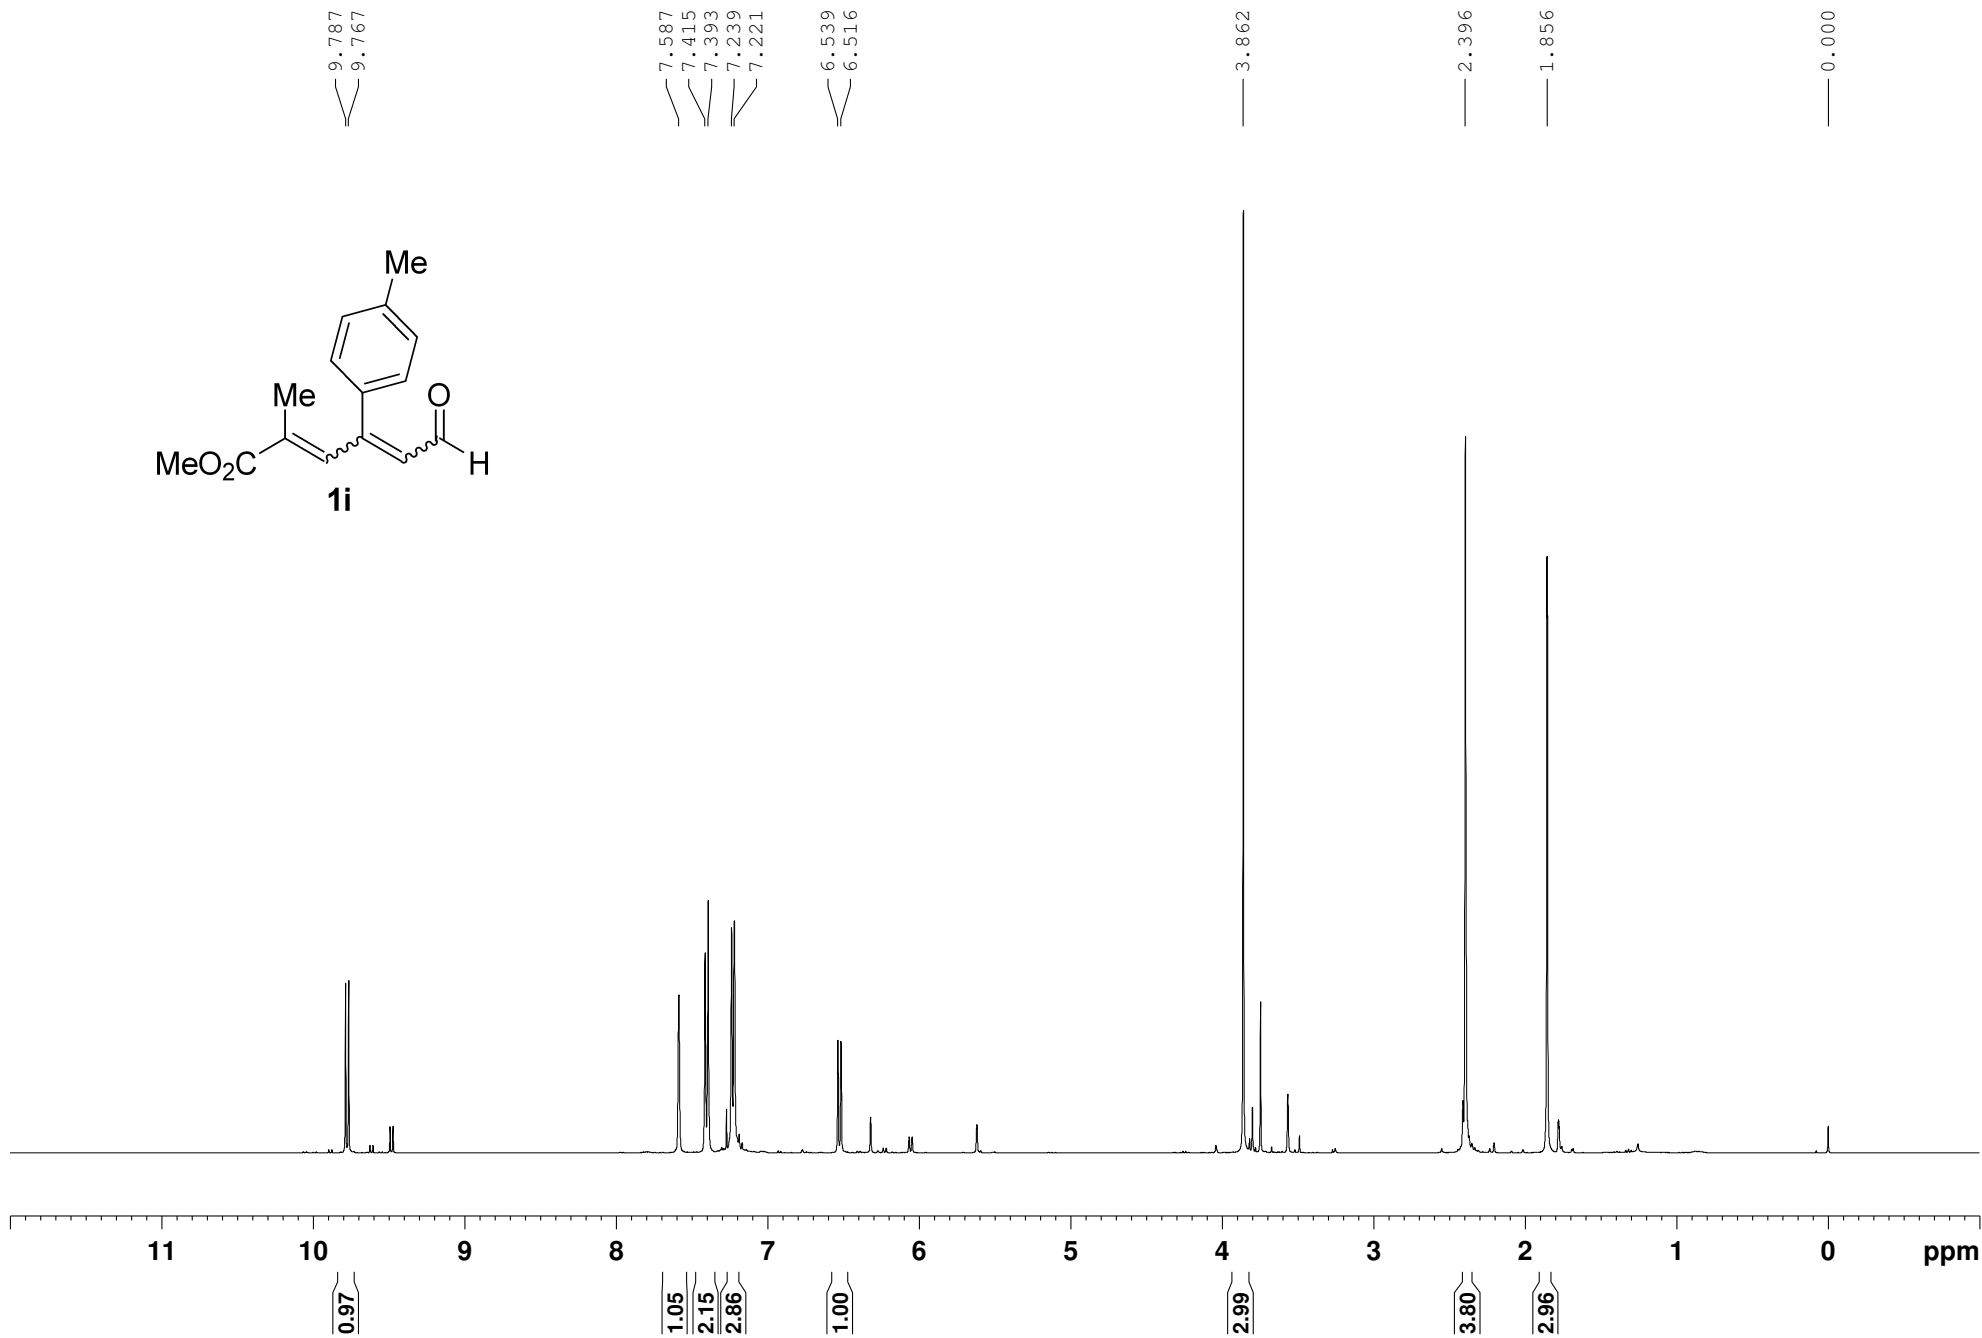

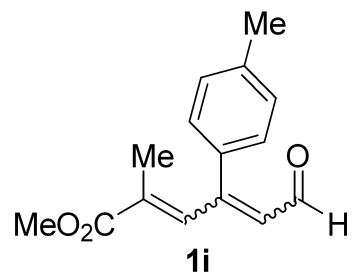

— 192.20

— 167.27

— 155.58

— 141.64

134.91

134.43

133.37

129.74

127.12

125.94

77.36

77.04

76.72

— 52.37

— 21.41

— 14.47

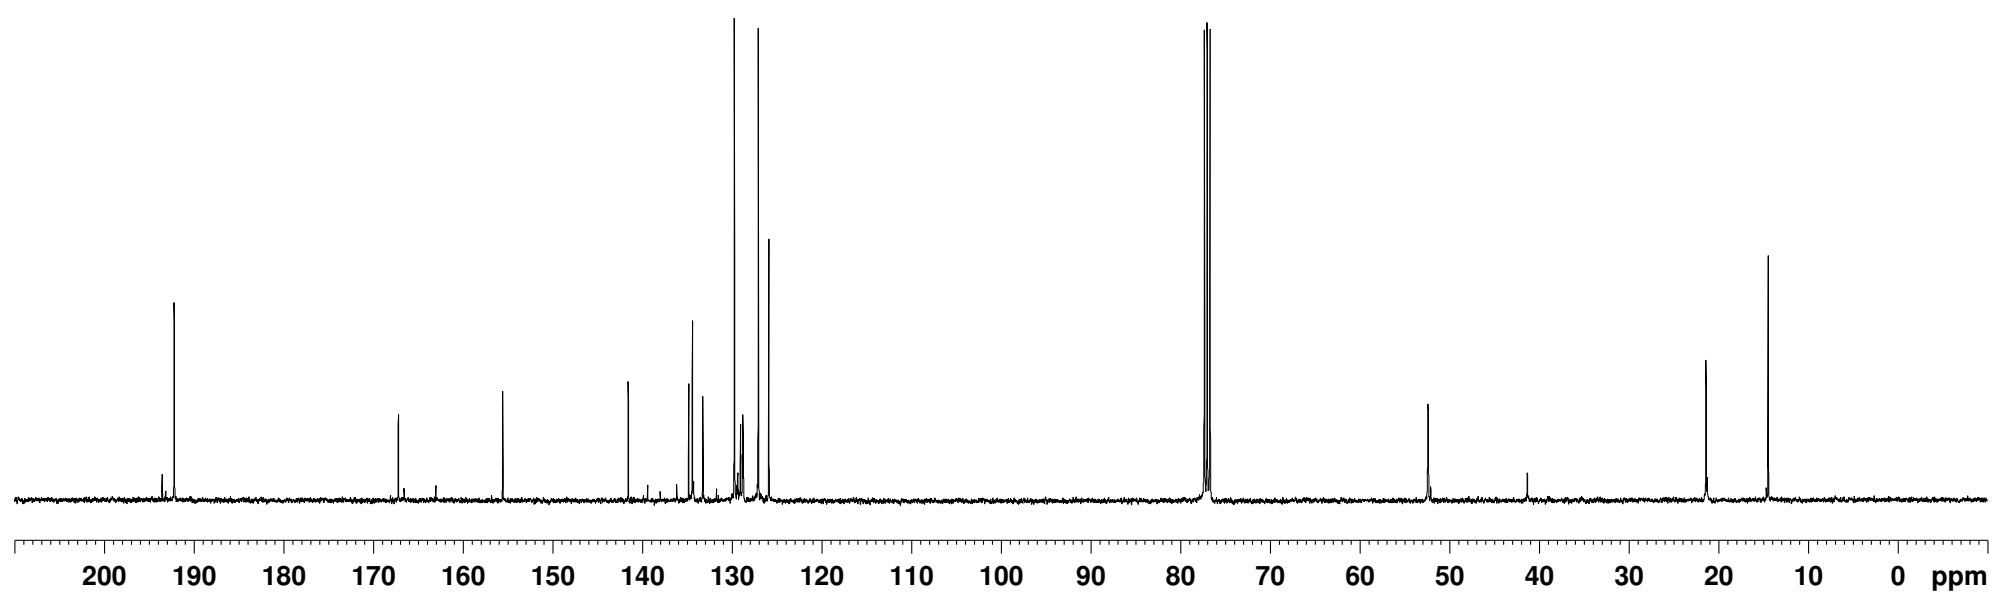

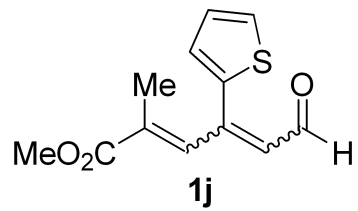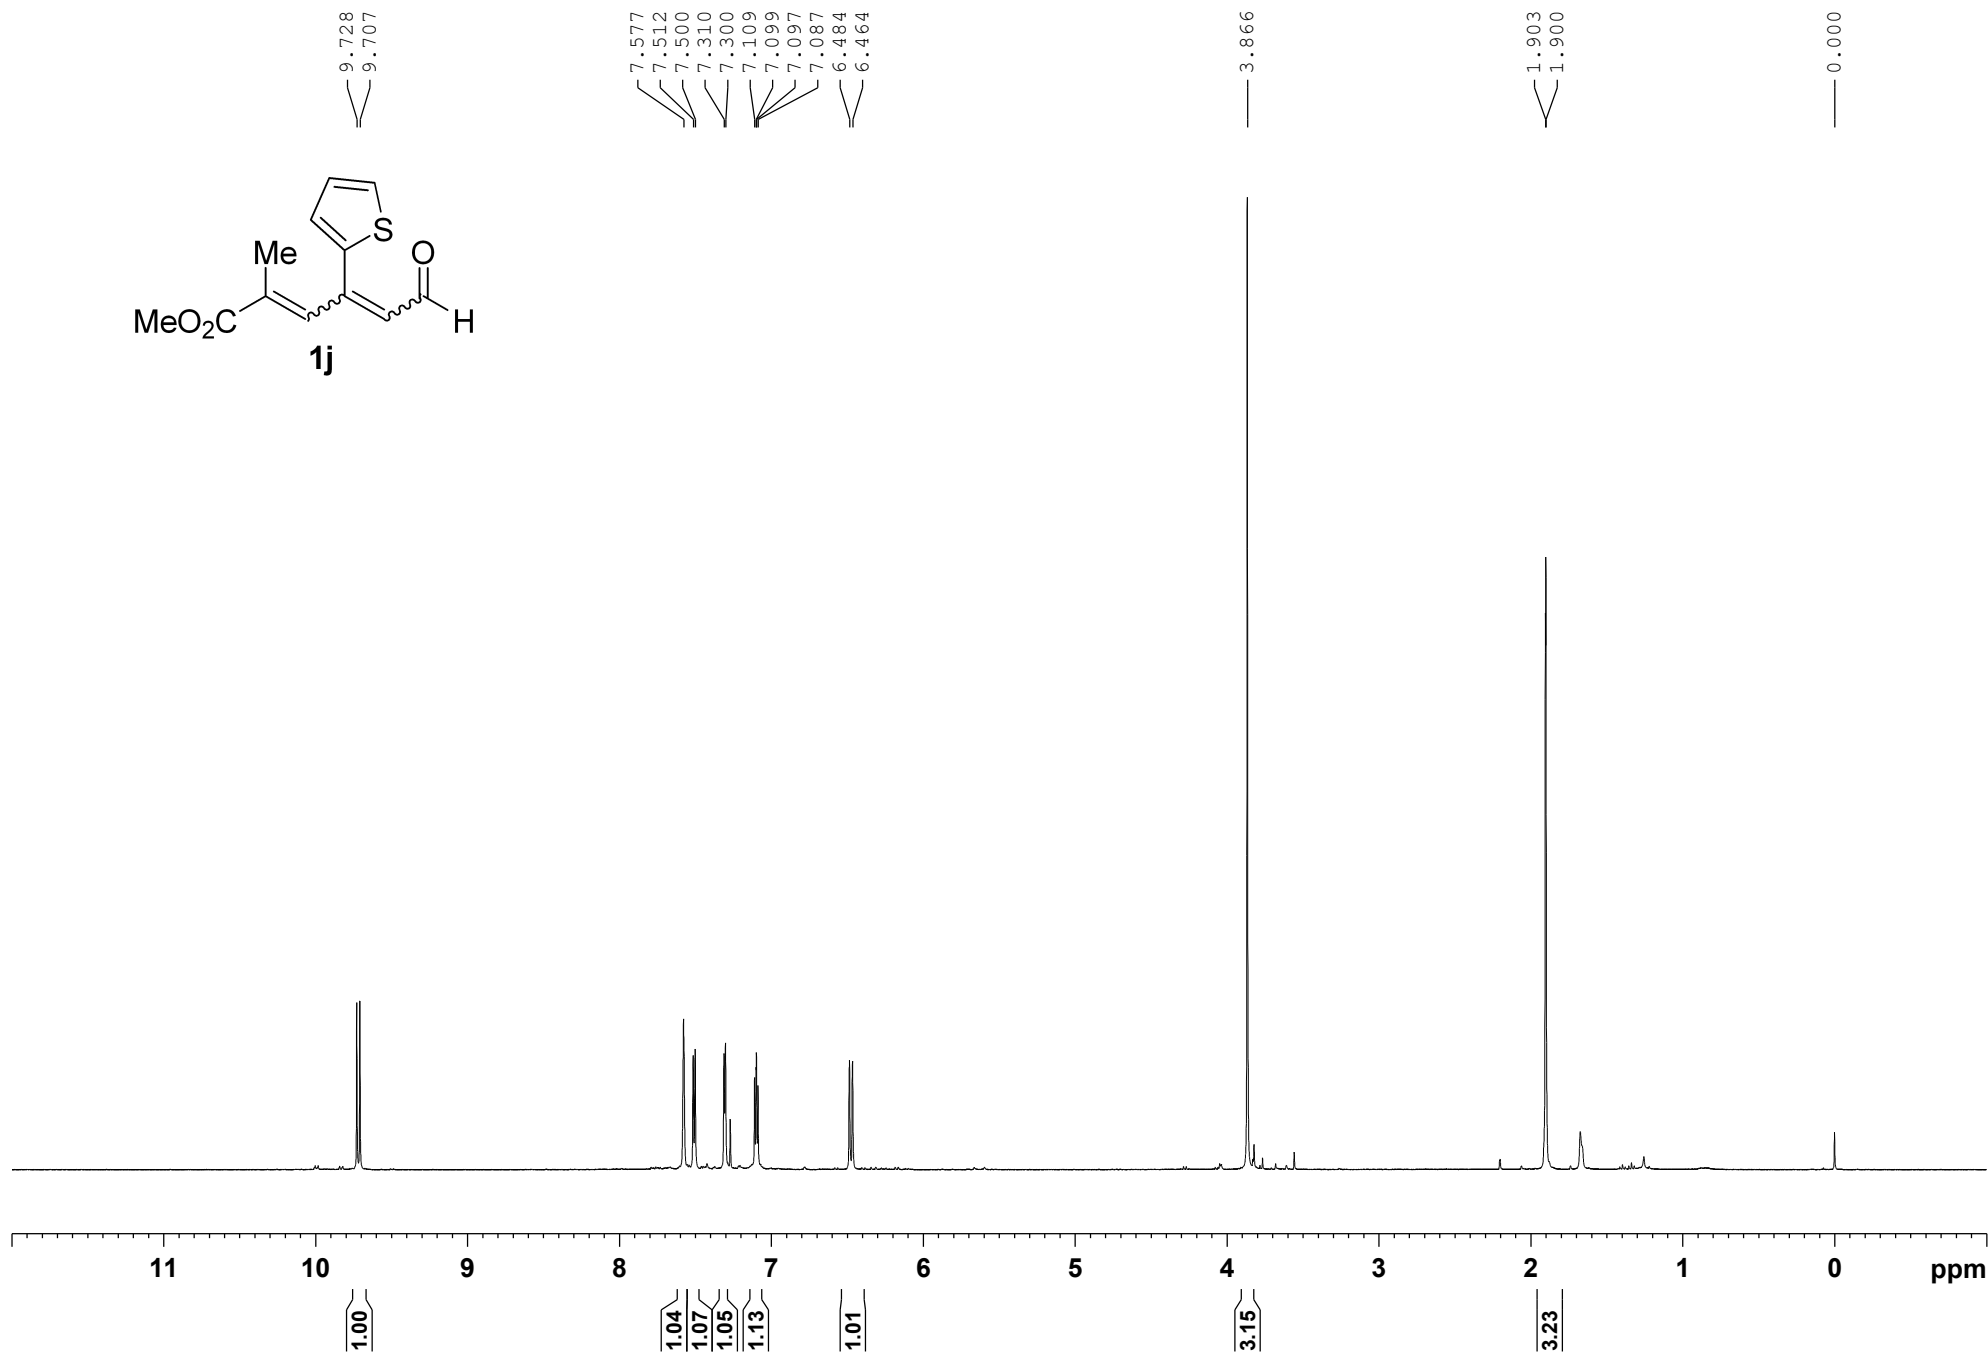

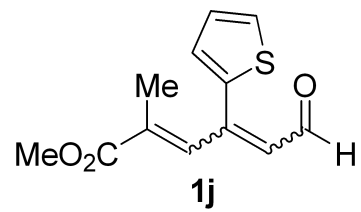

— 191.54

— 167.07

— 148.88

— 140.65

— 135.46

— 132.97

— 130.31

— 129.77

— 128.63

— 124.03

77.42

77.09

76.72

— 52.46

— 14.56

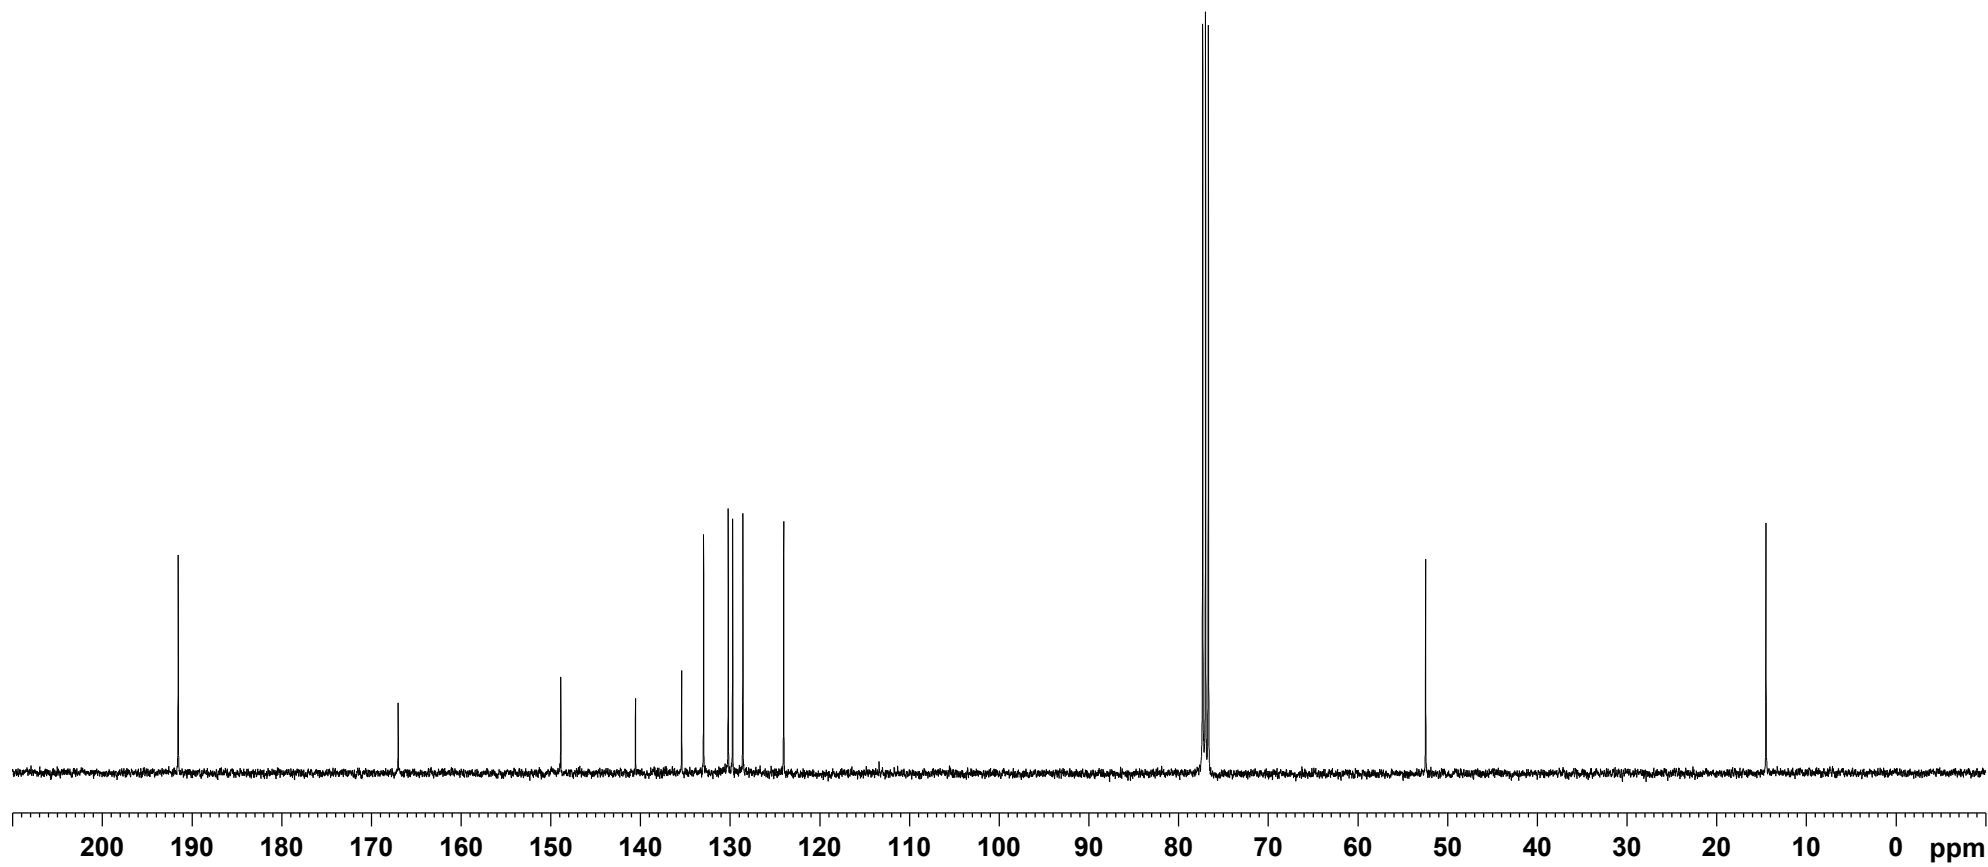

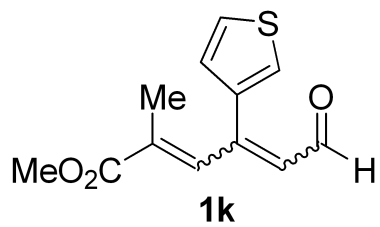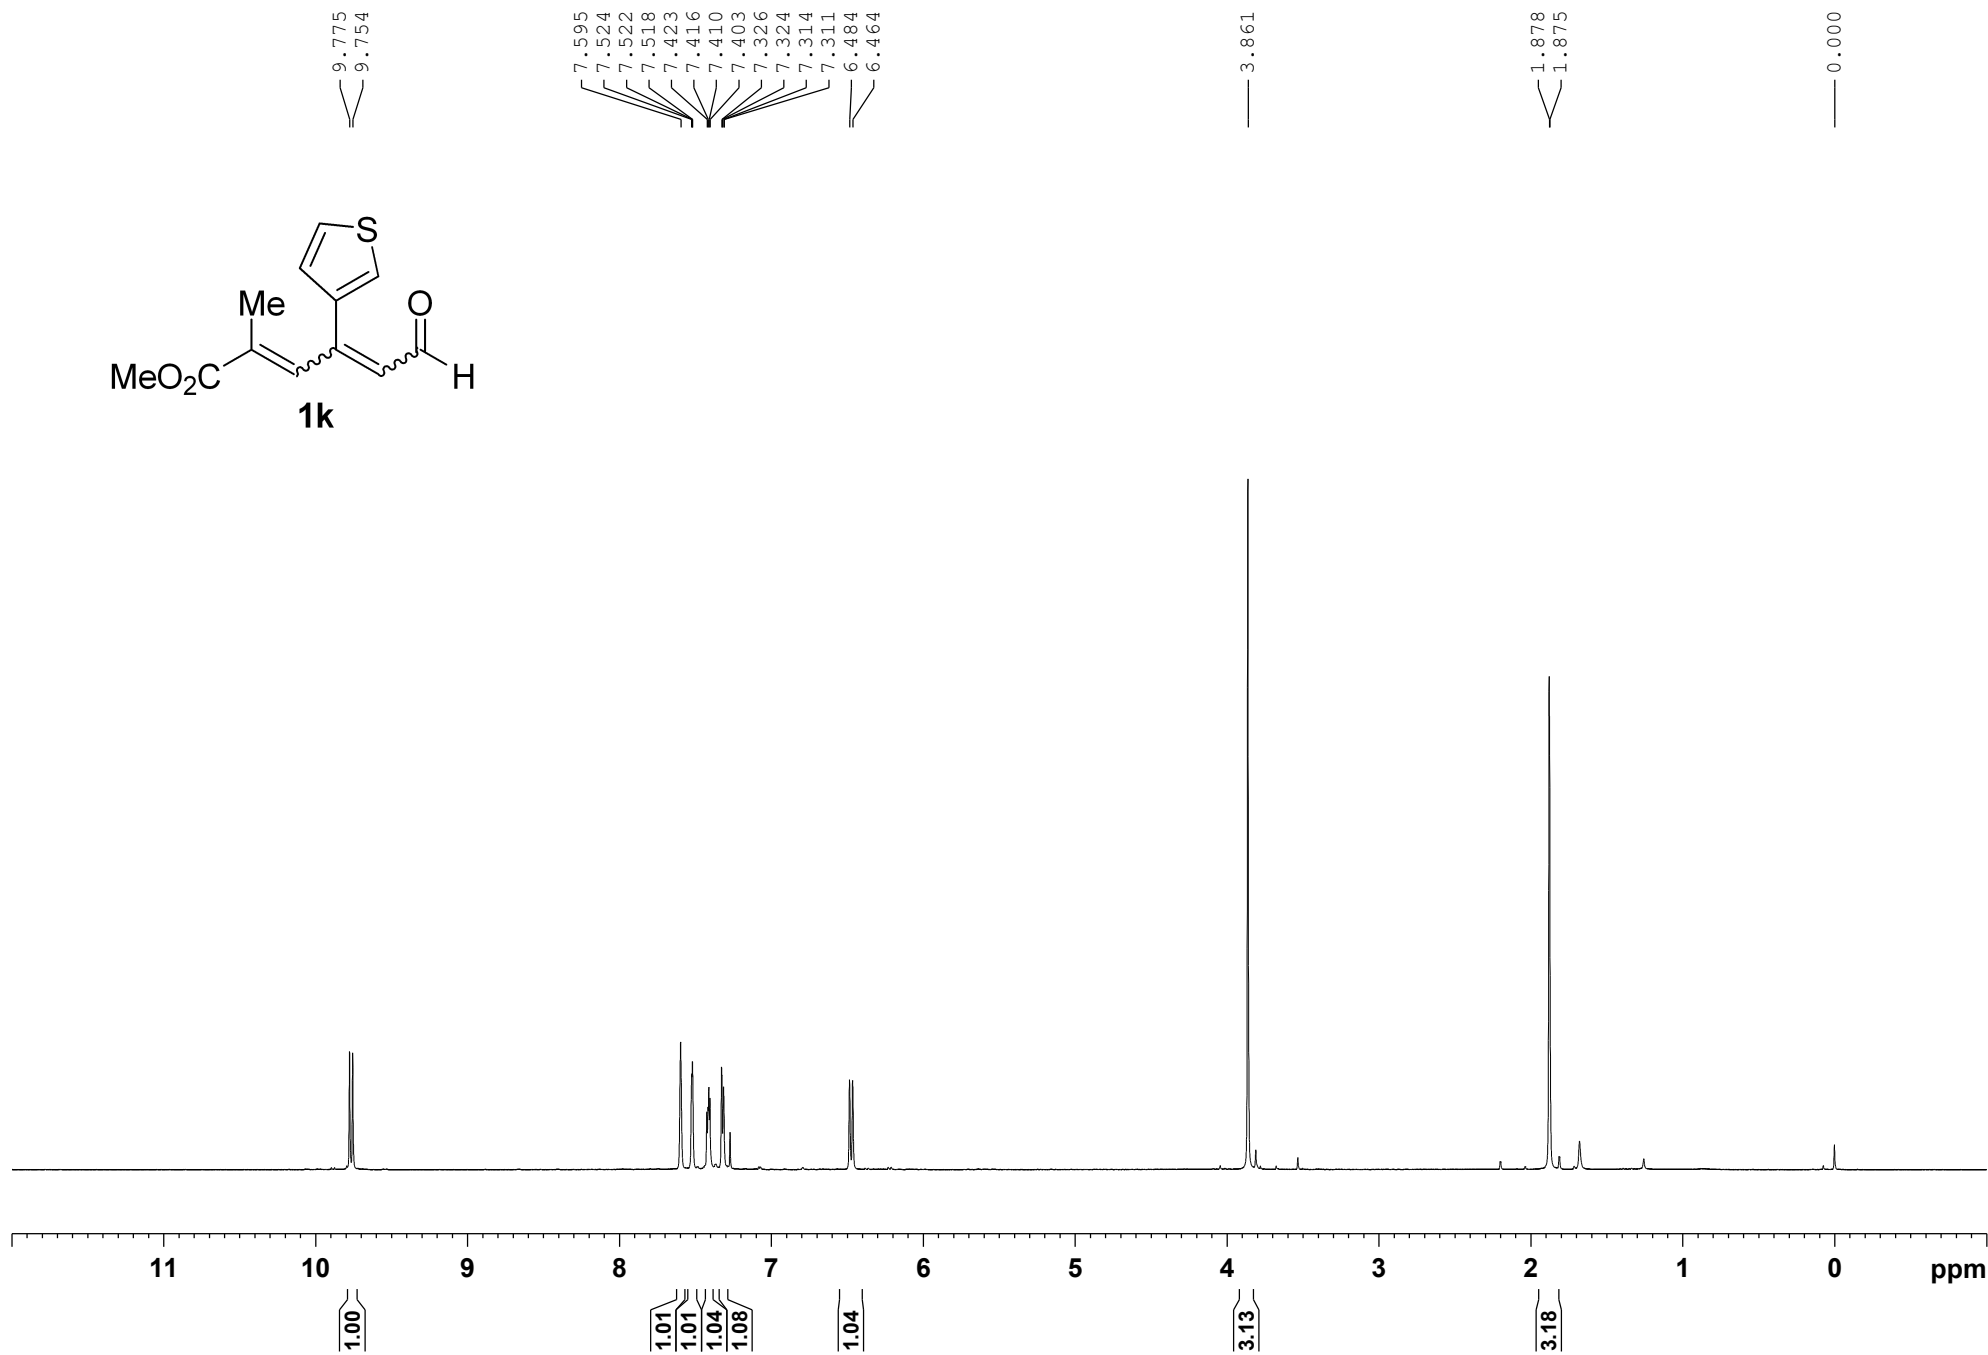

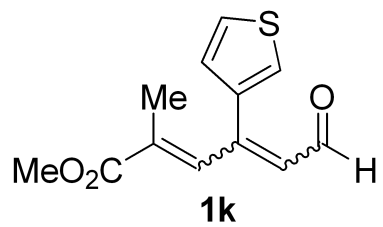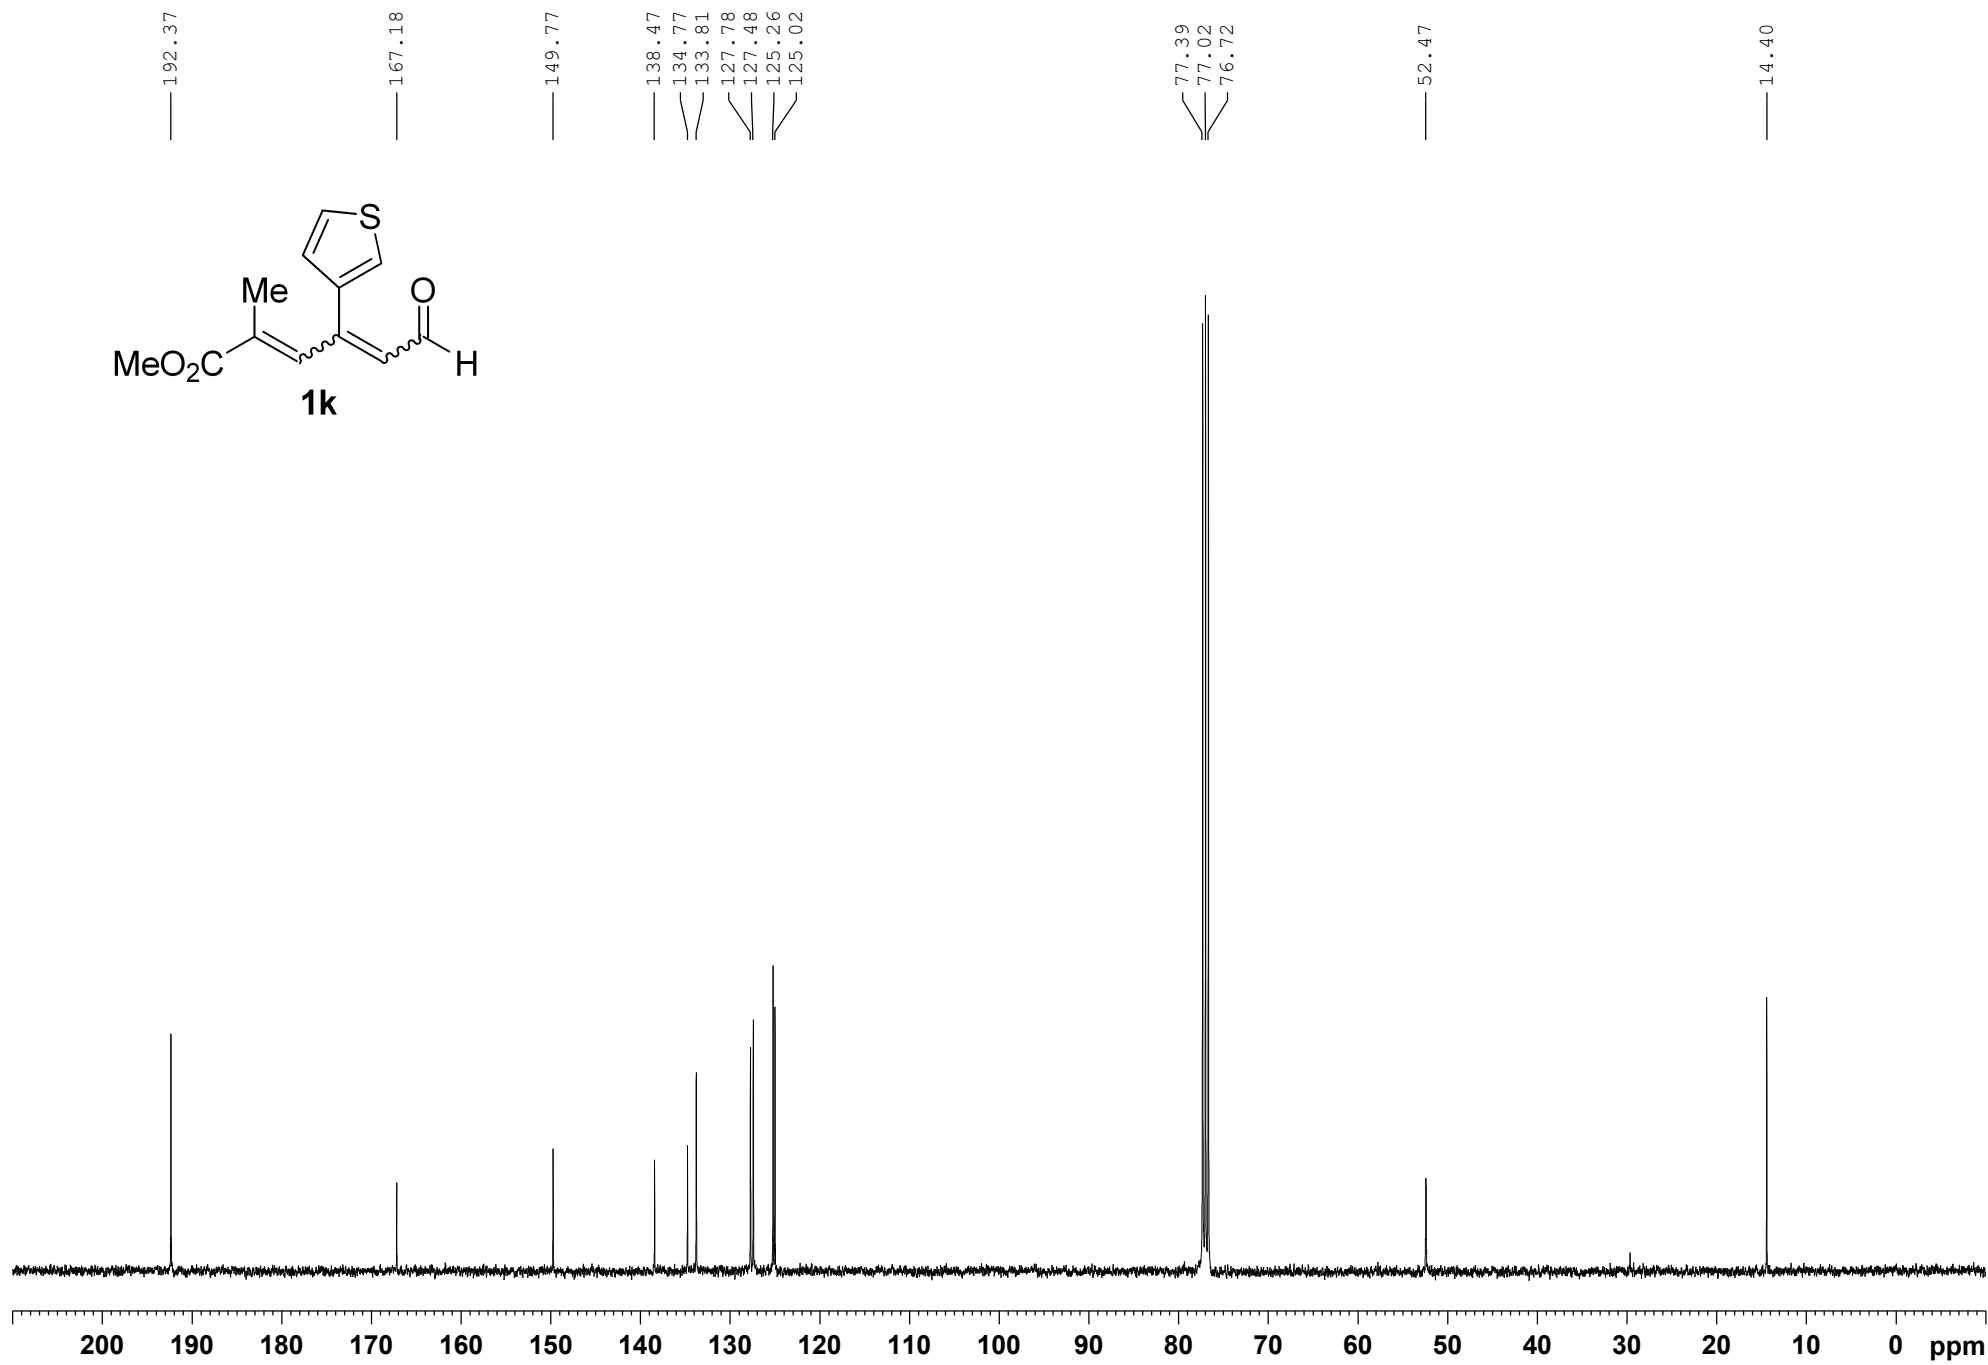

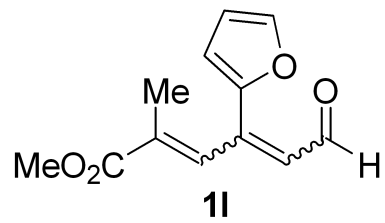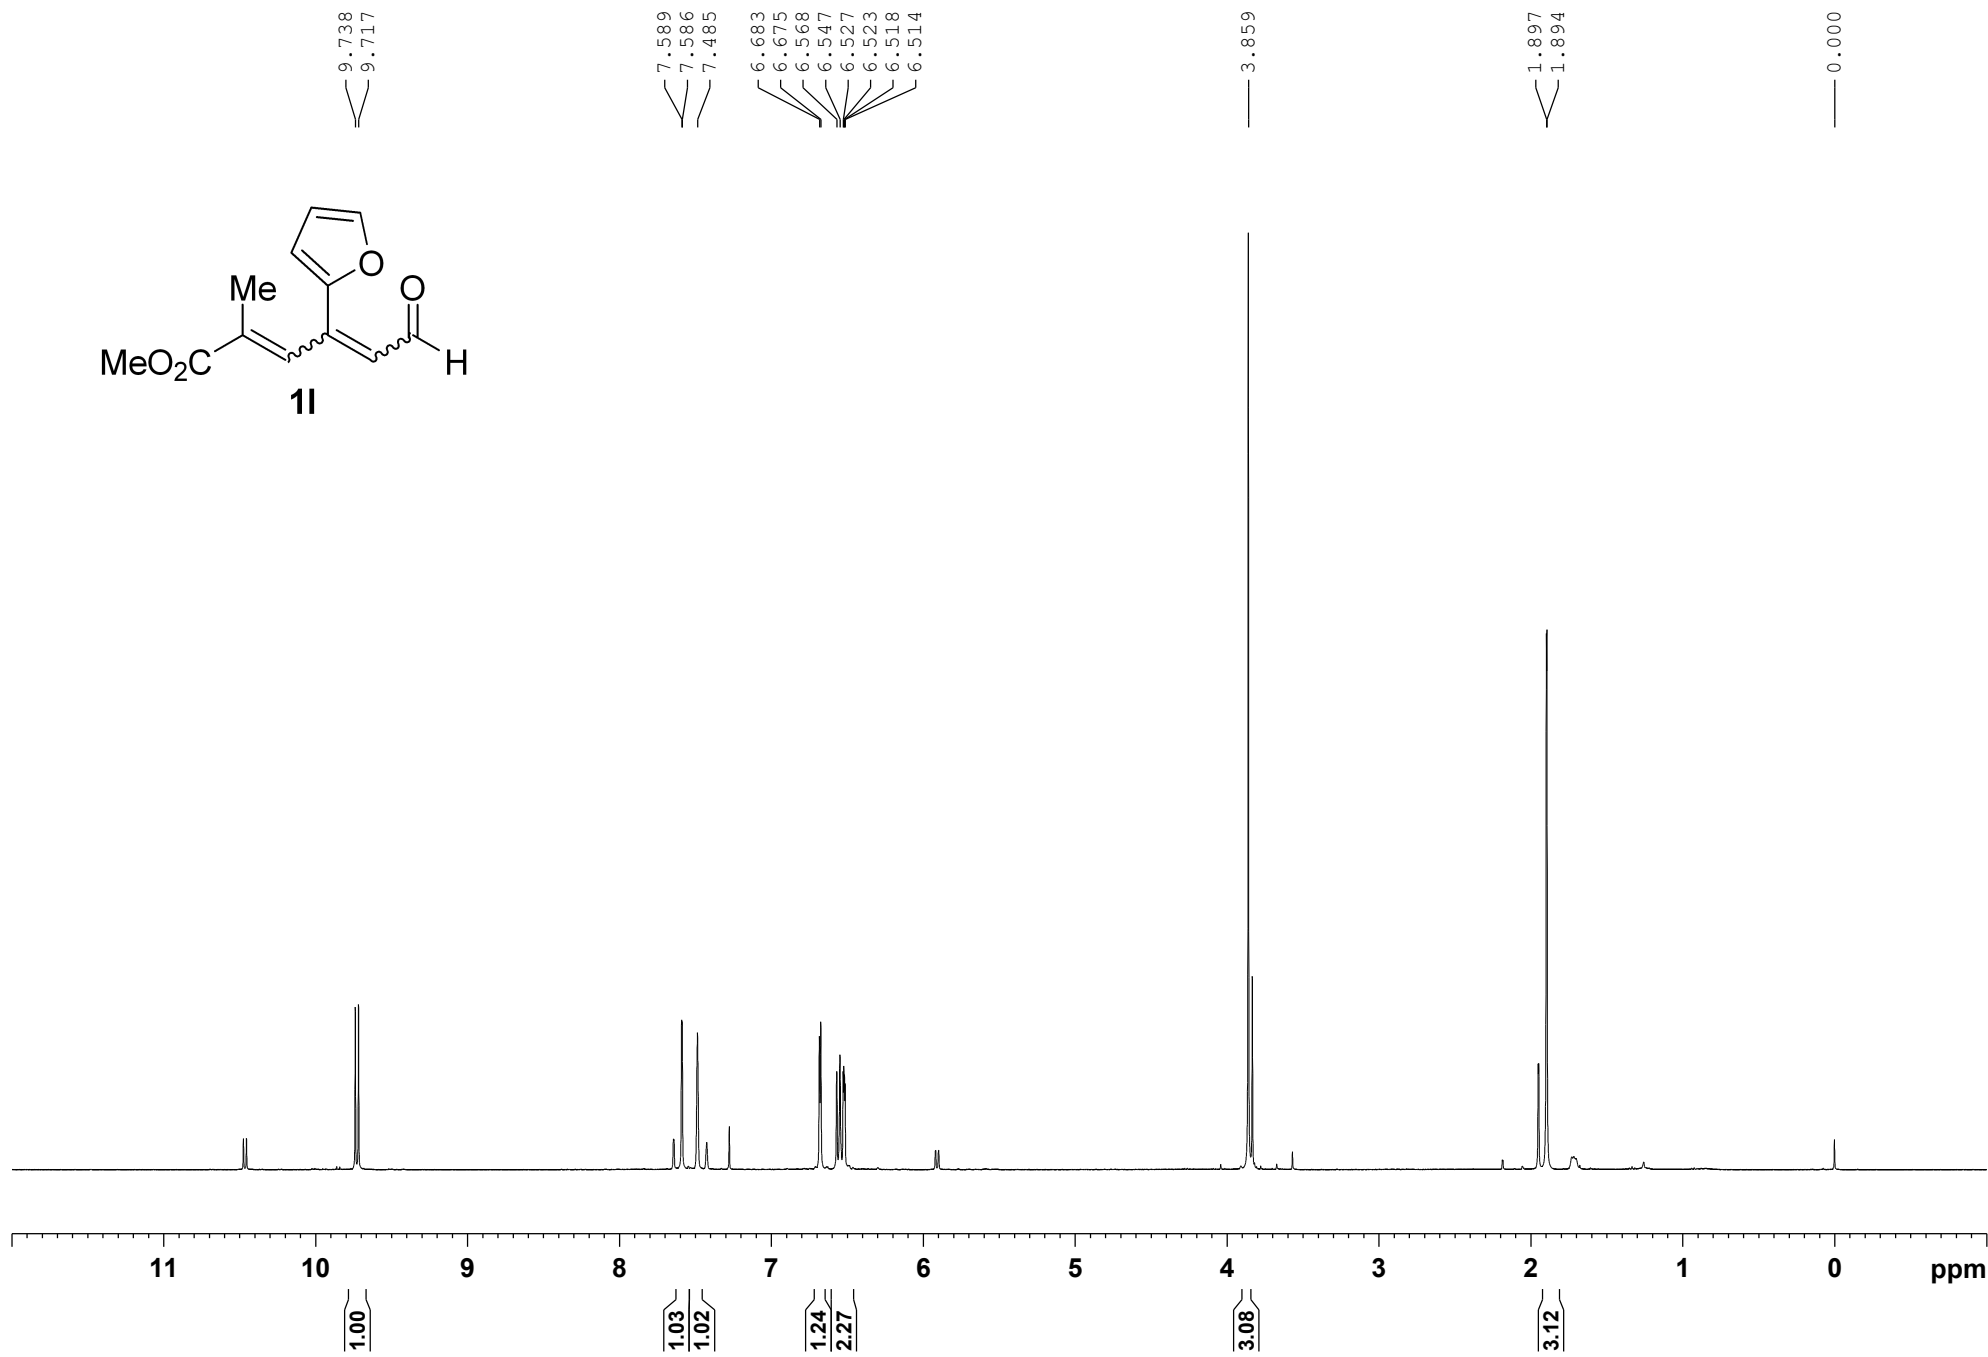

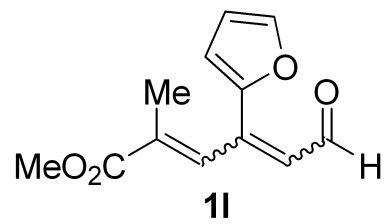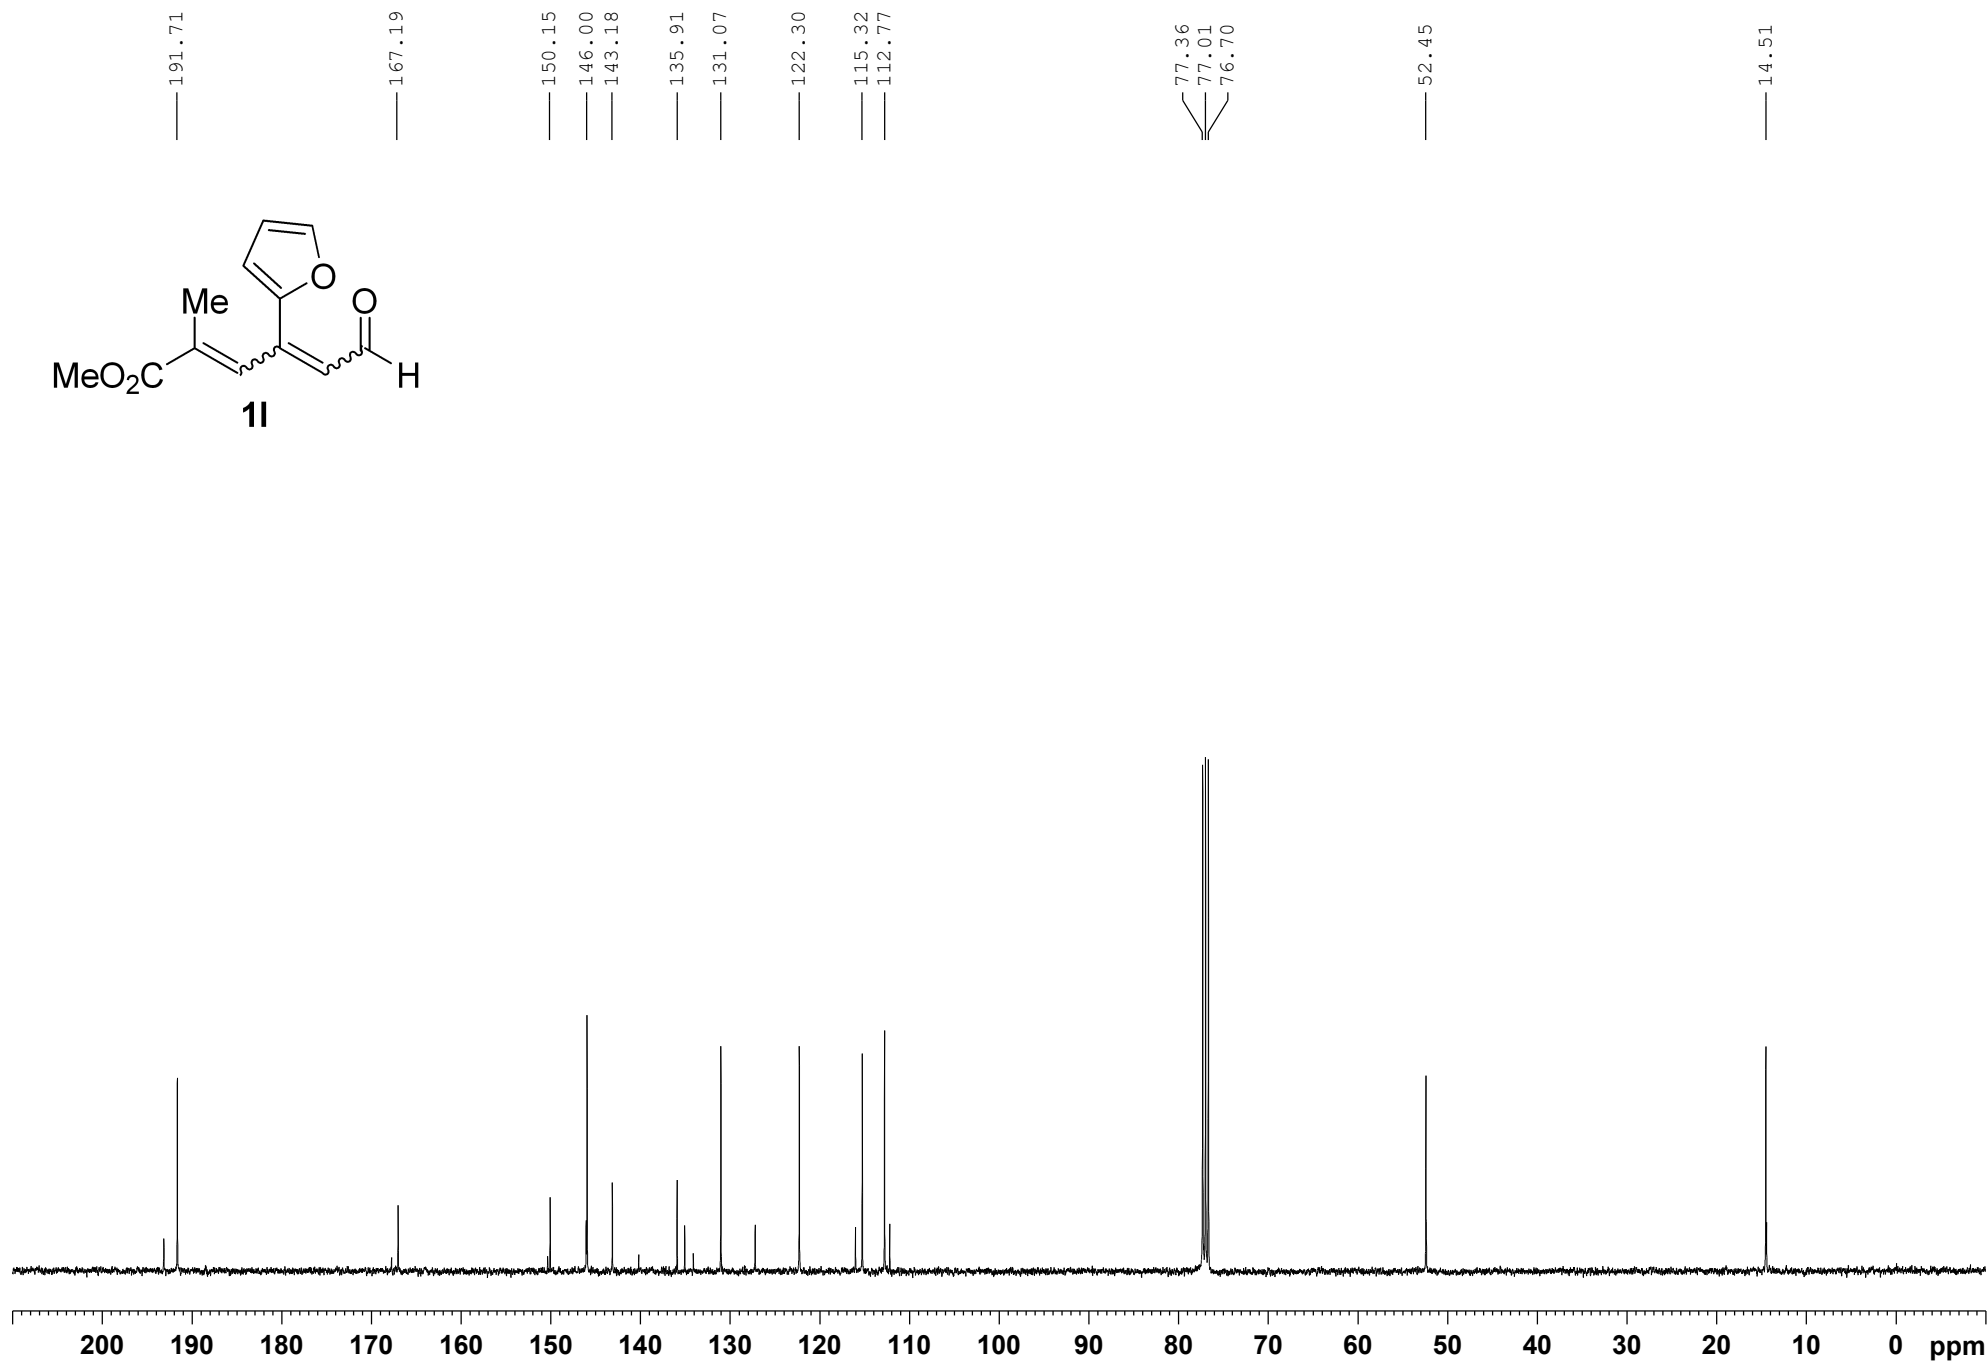



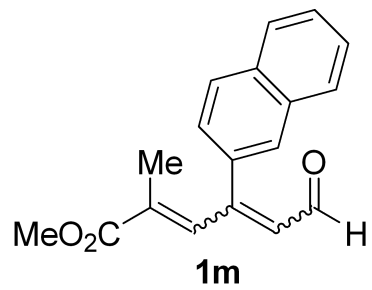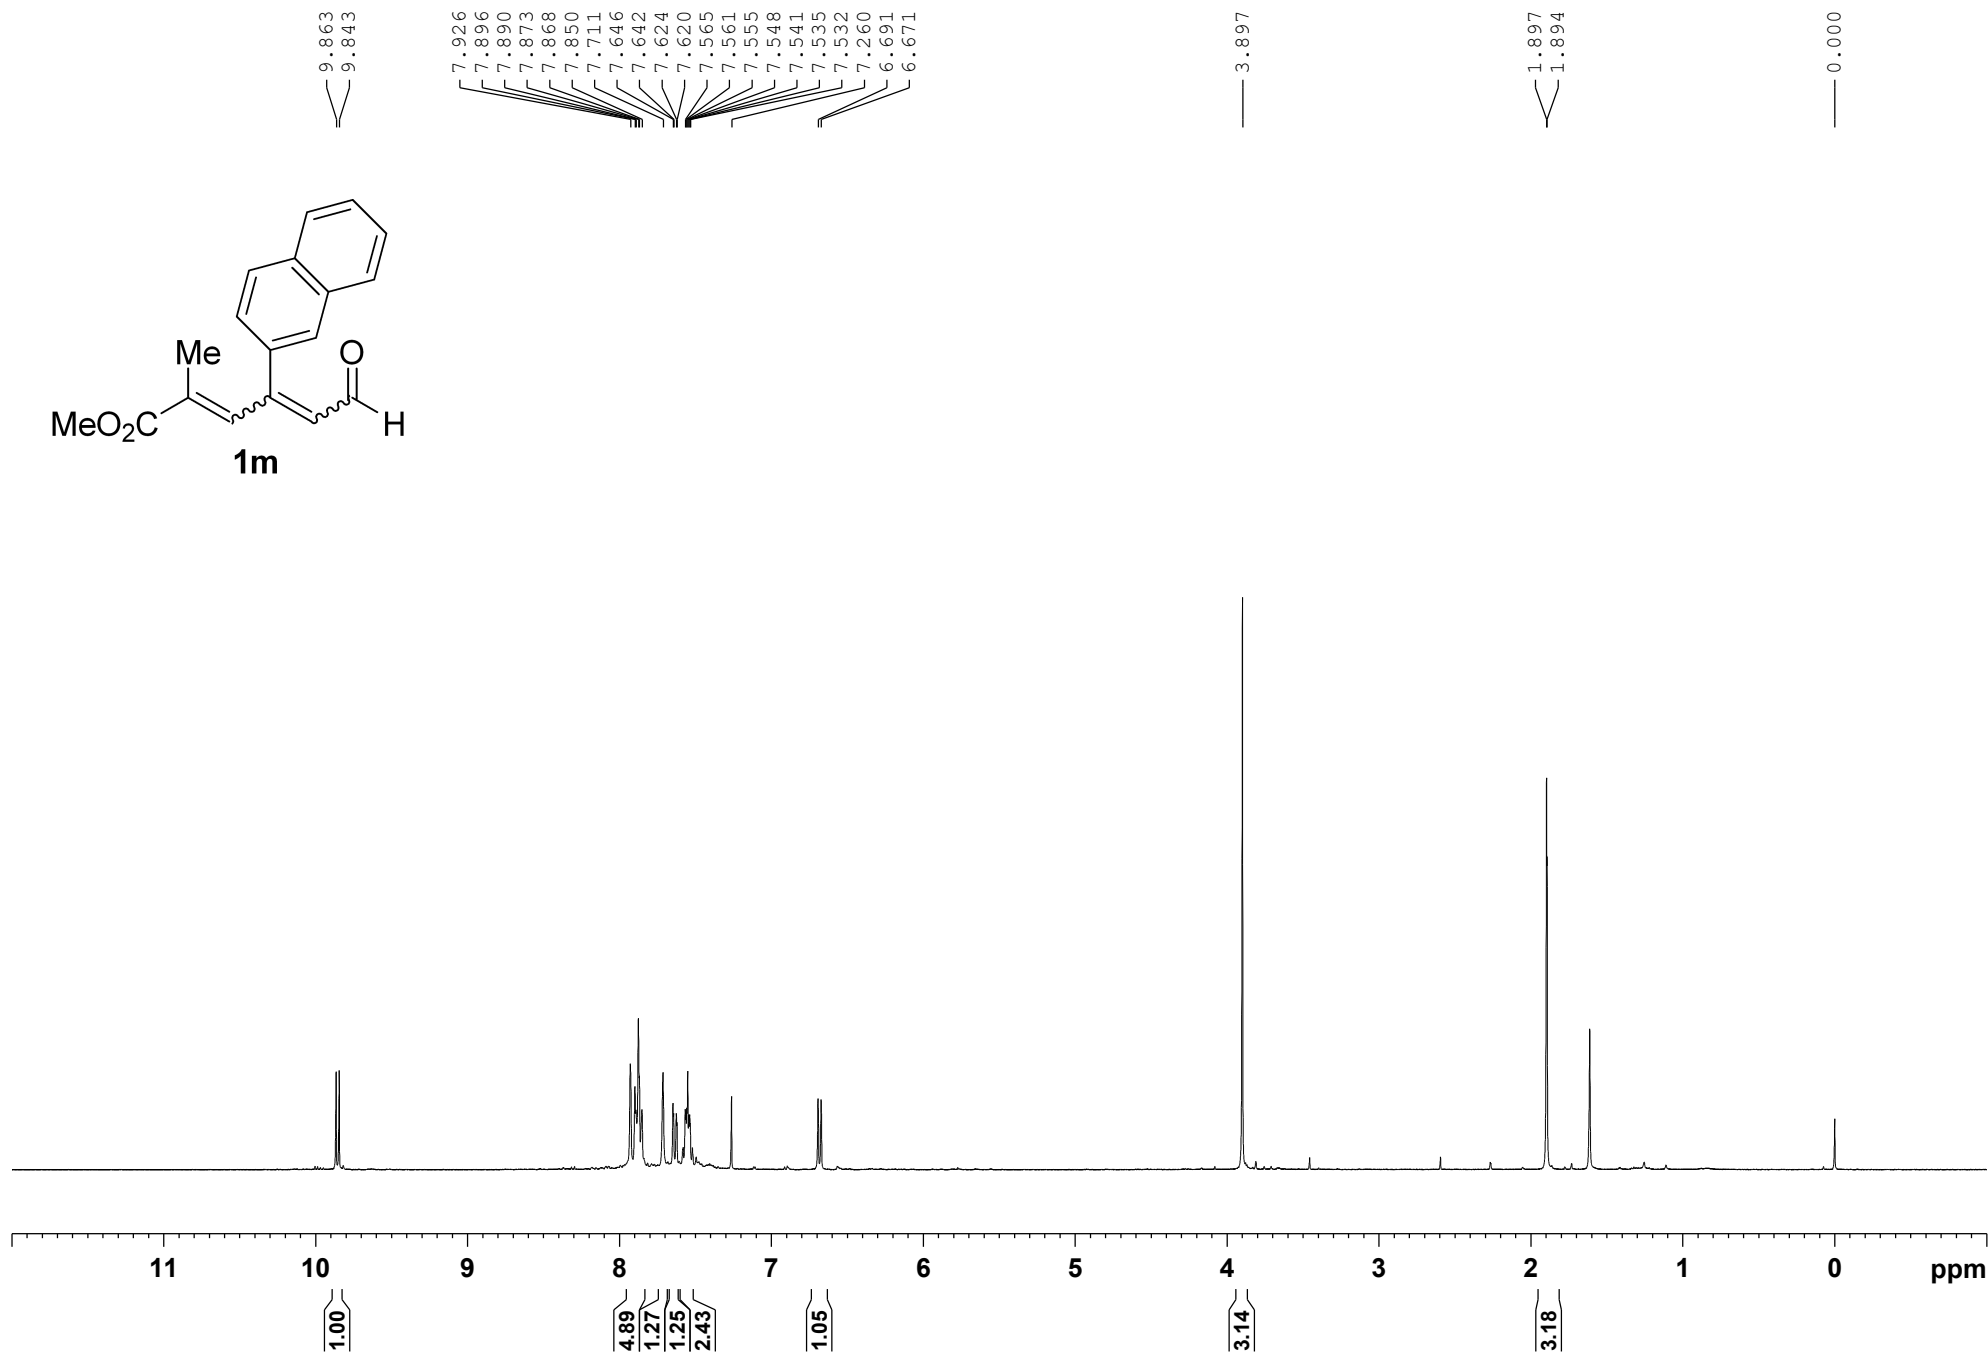

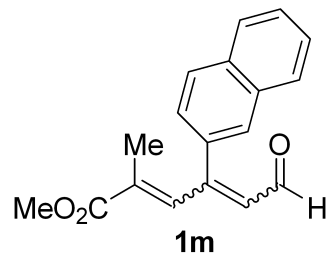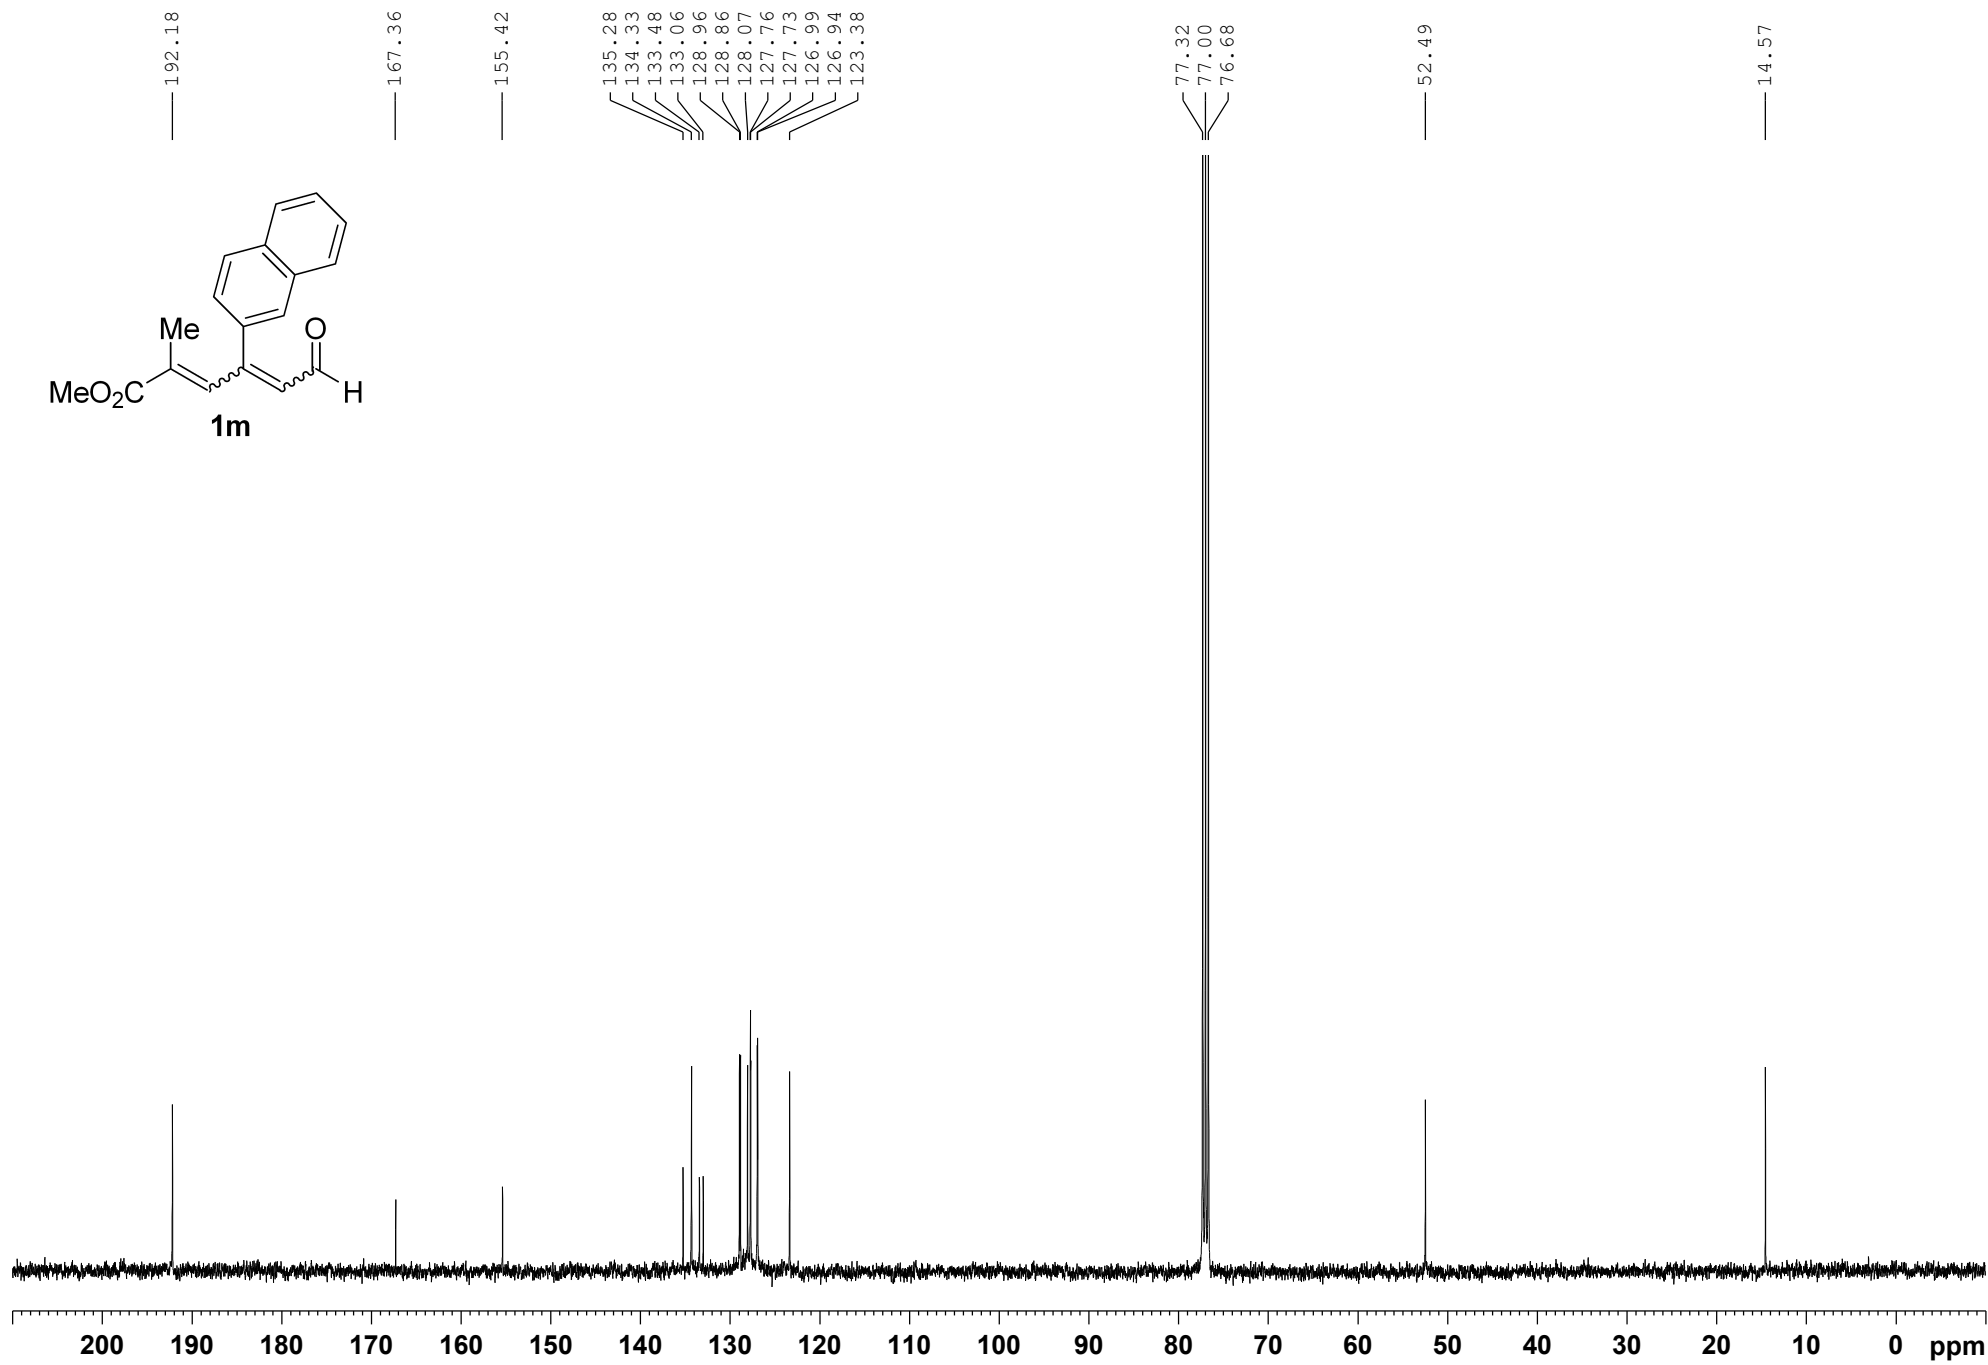

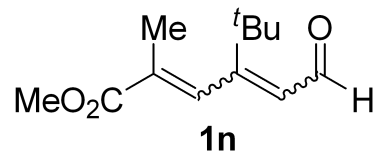

9.544  
9.537  
9.524  
9.517

7.396

6.055  
6.035

3.827  
3.820

1.830

1.176

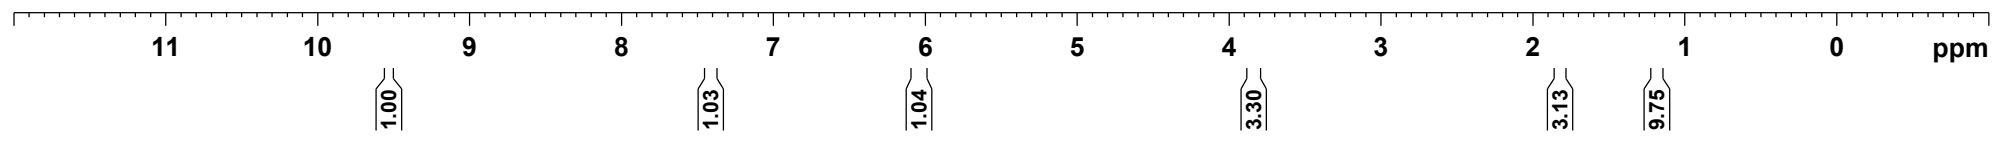

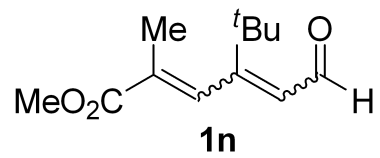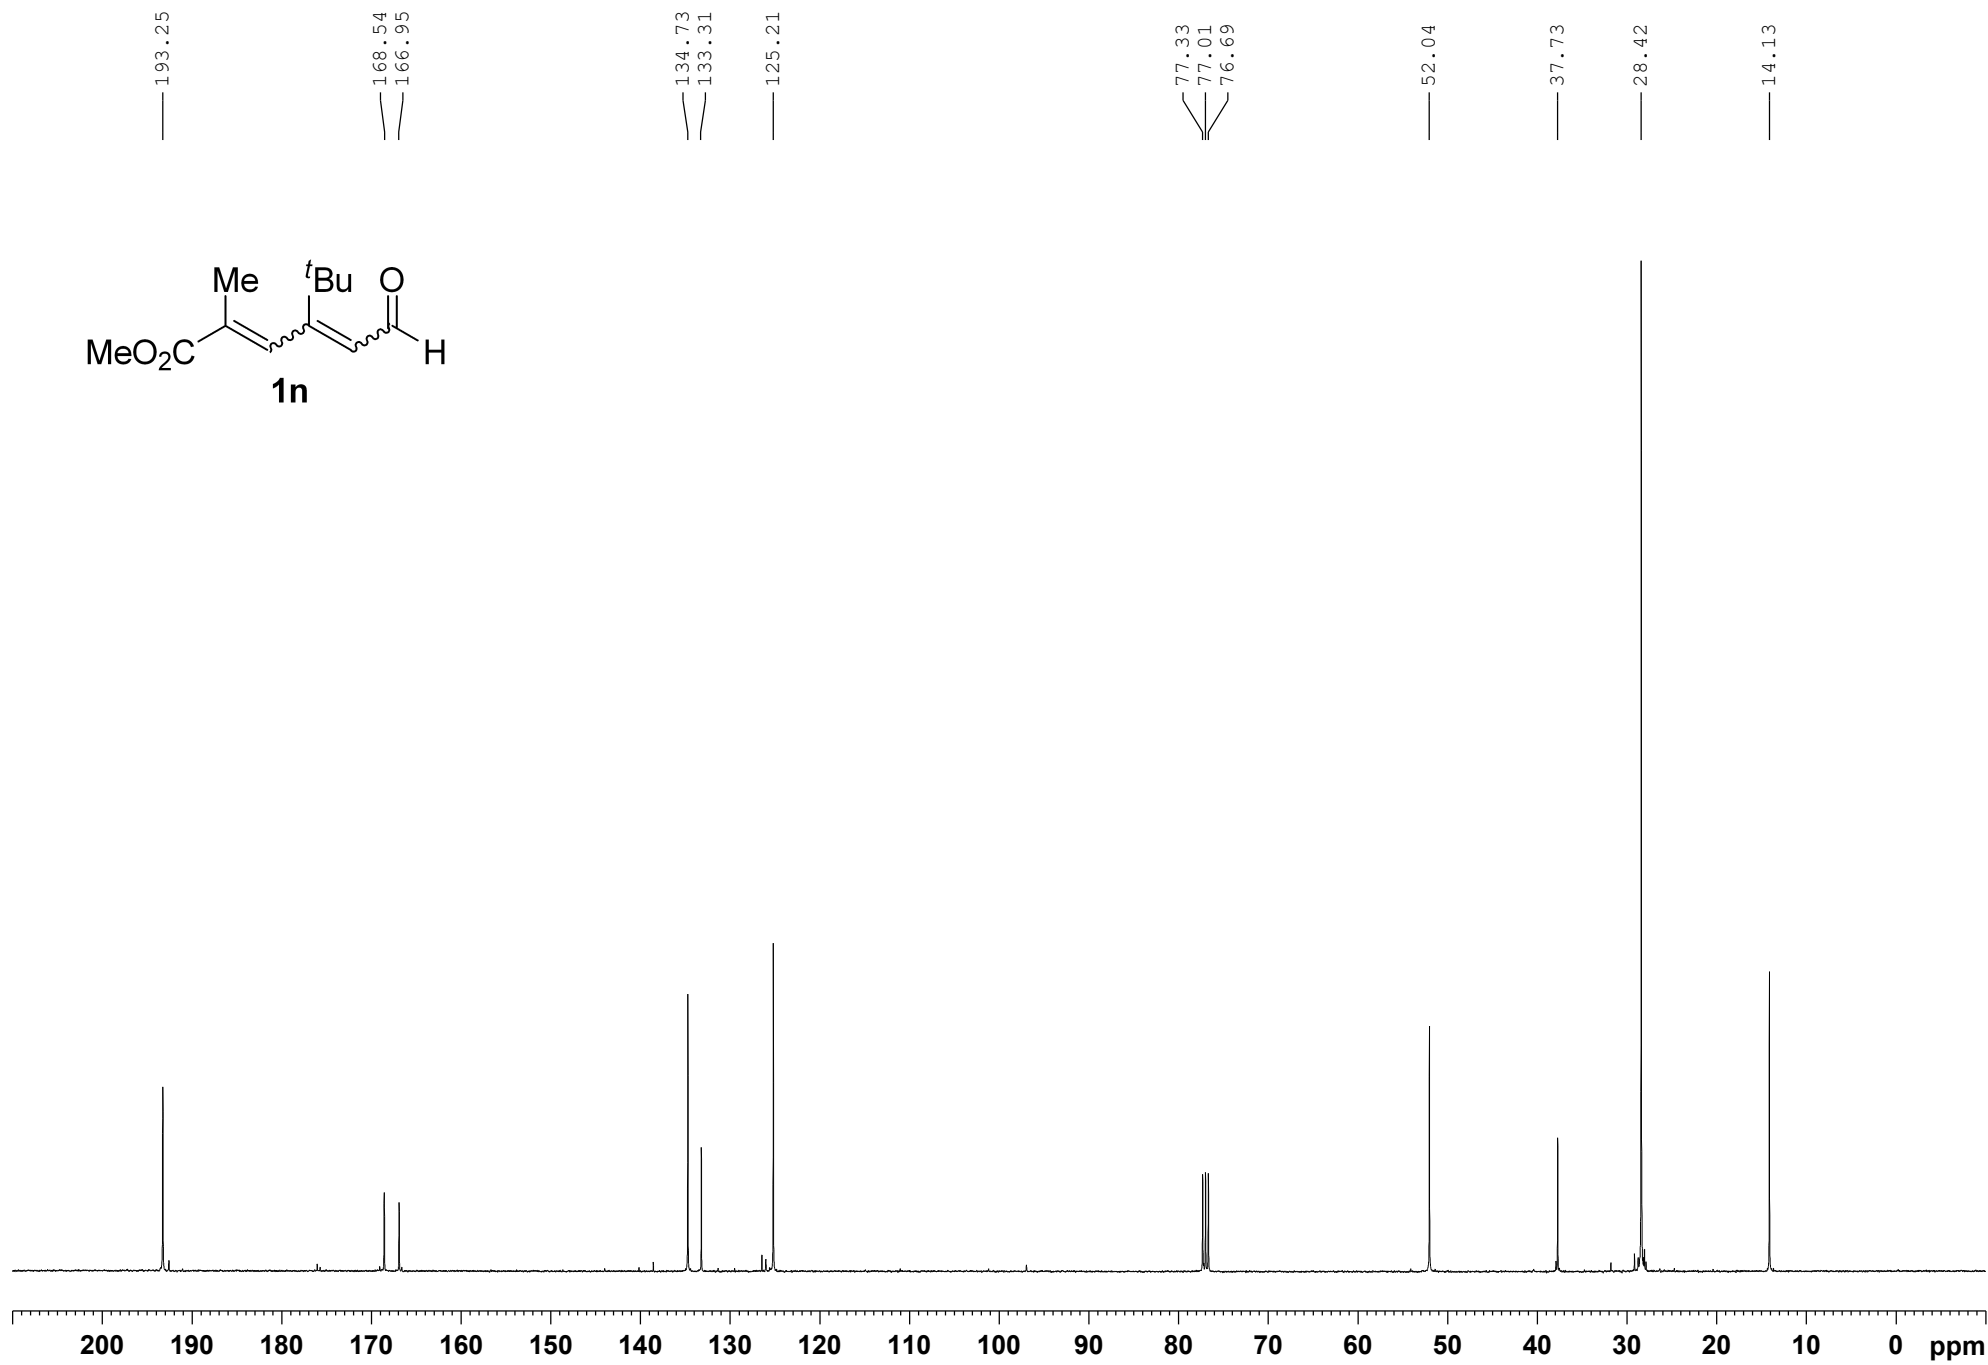

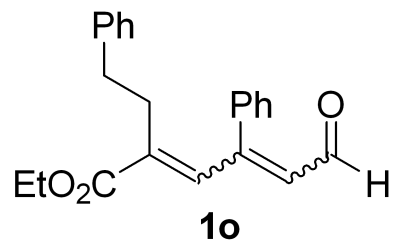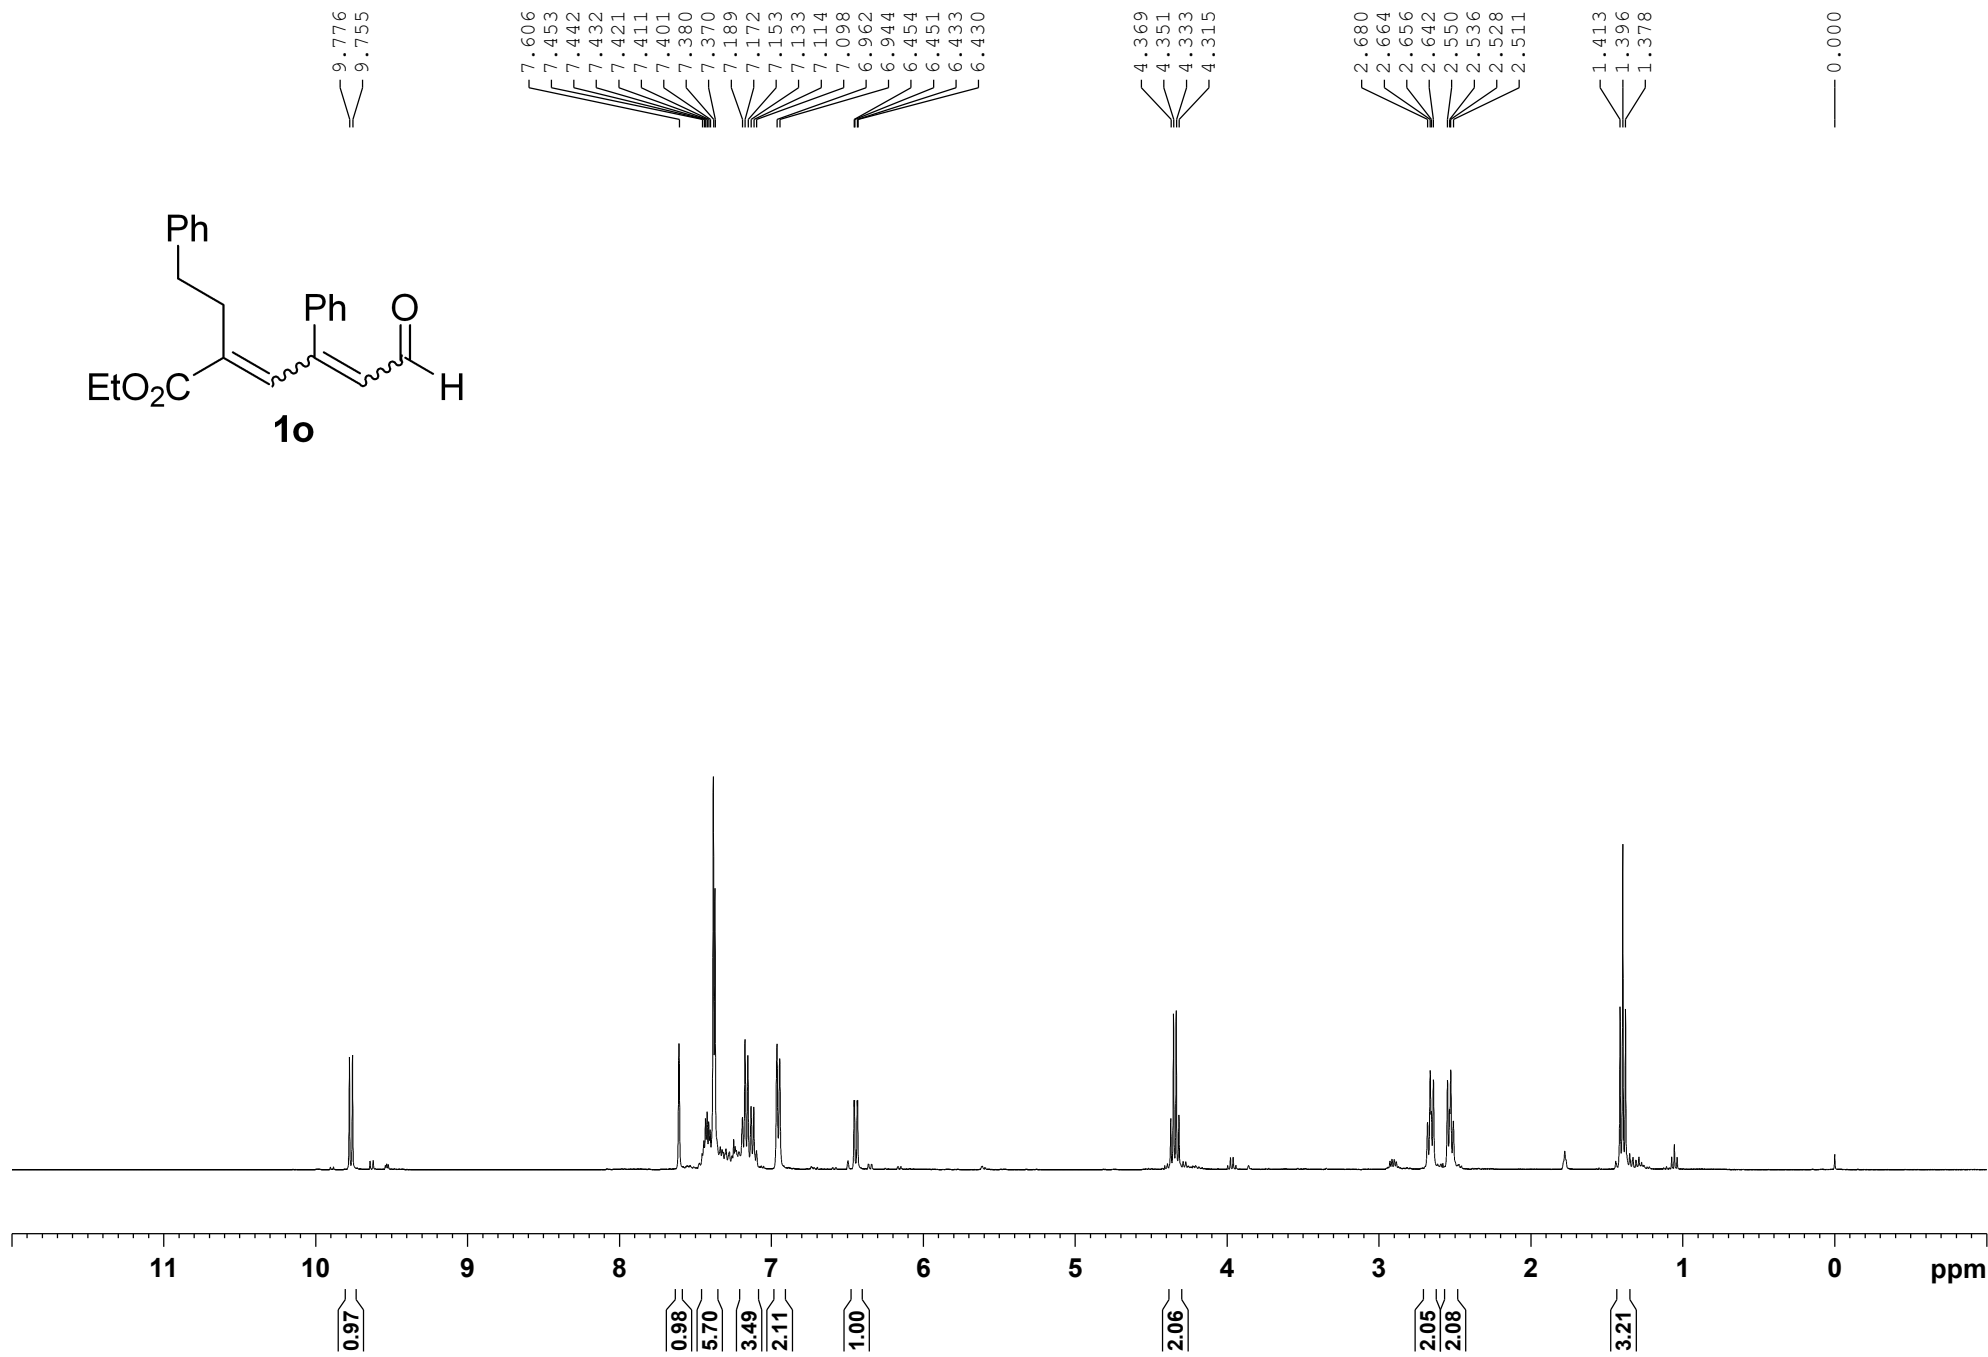

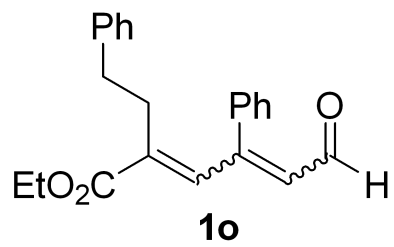

— 191.89

— 166.36

— 155.40

140.71  
138.81  
136.66  
134.46  
130.76  
128.91  
128.33  
128.28  
127.22  
126.75  
126.10

77.32  
77.00  
76.69

— 61.31

— 34.30  
— 30.72

— 14.20

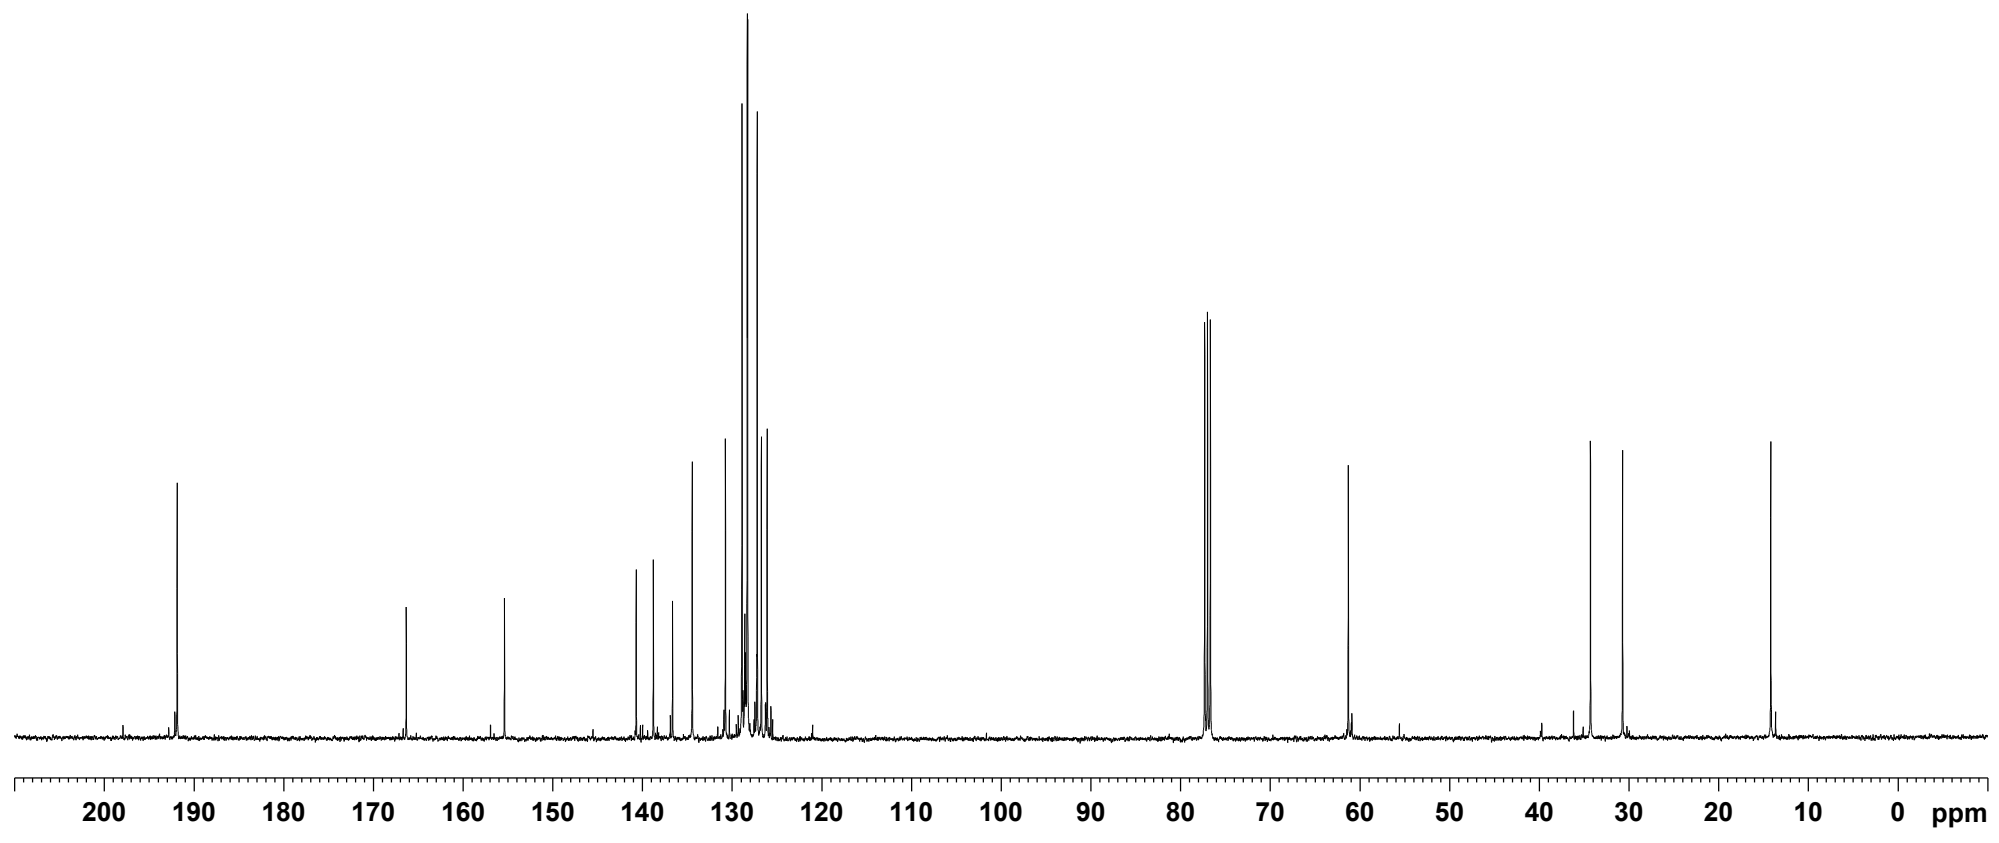

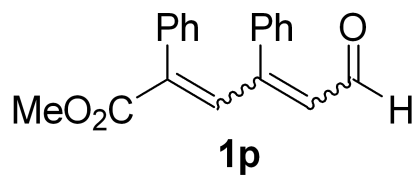

9.803  
9.783

7.856  
7.502  
7.486  
7.481  
7.428  
7.414  
7.394  
7.375  
7.359  
7.200  
7.195  
7.185  
7.115  
7.110  
7.102  
7.092  
7.080  
6.238  
6.218

3.863

0.000

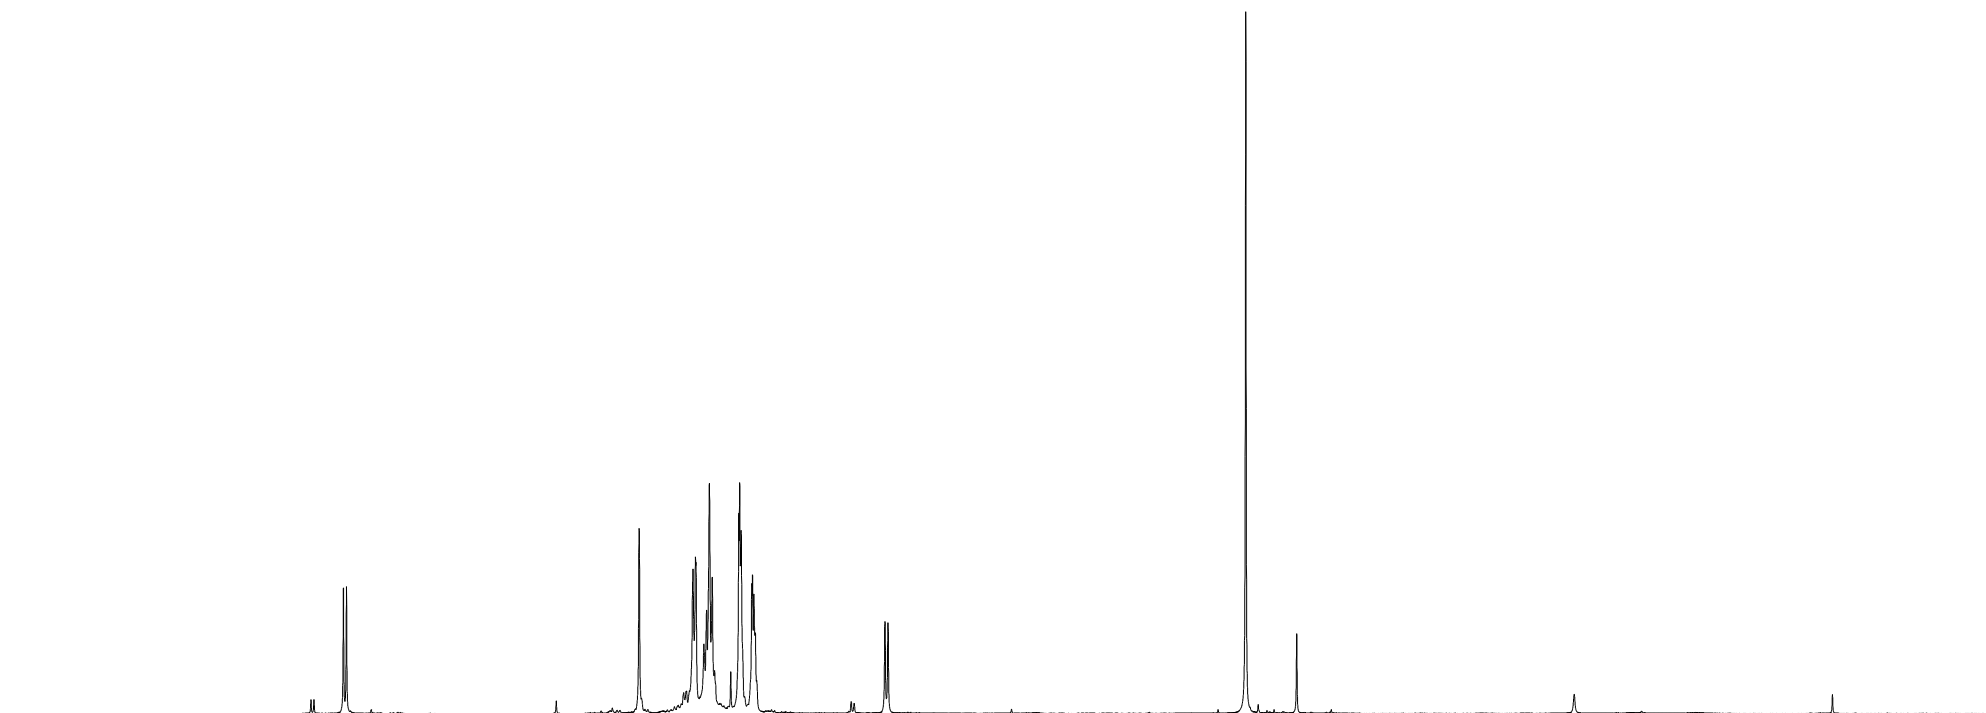

11

10

9

8

7

6

5

4

3

2

1

0

ppm

1.00

1.05

2.60

4.00

2.70

2.16

1.03

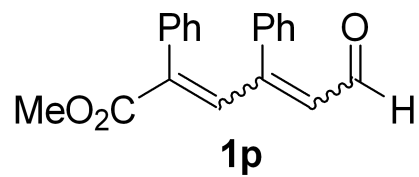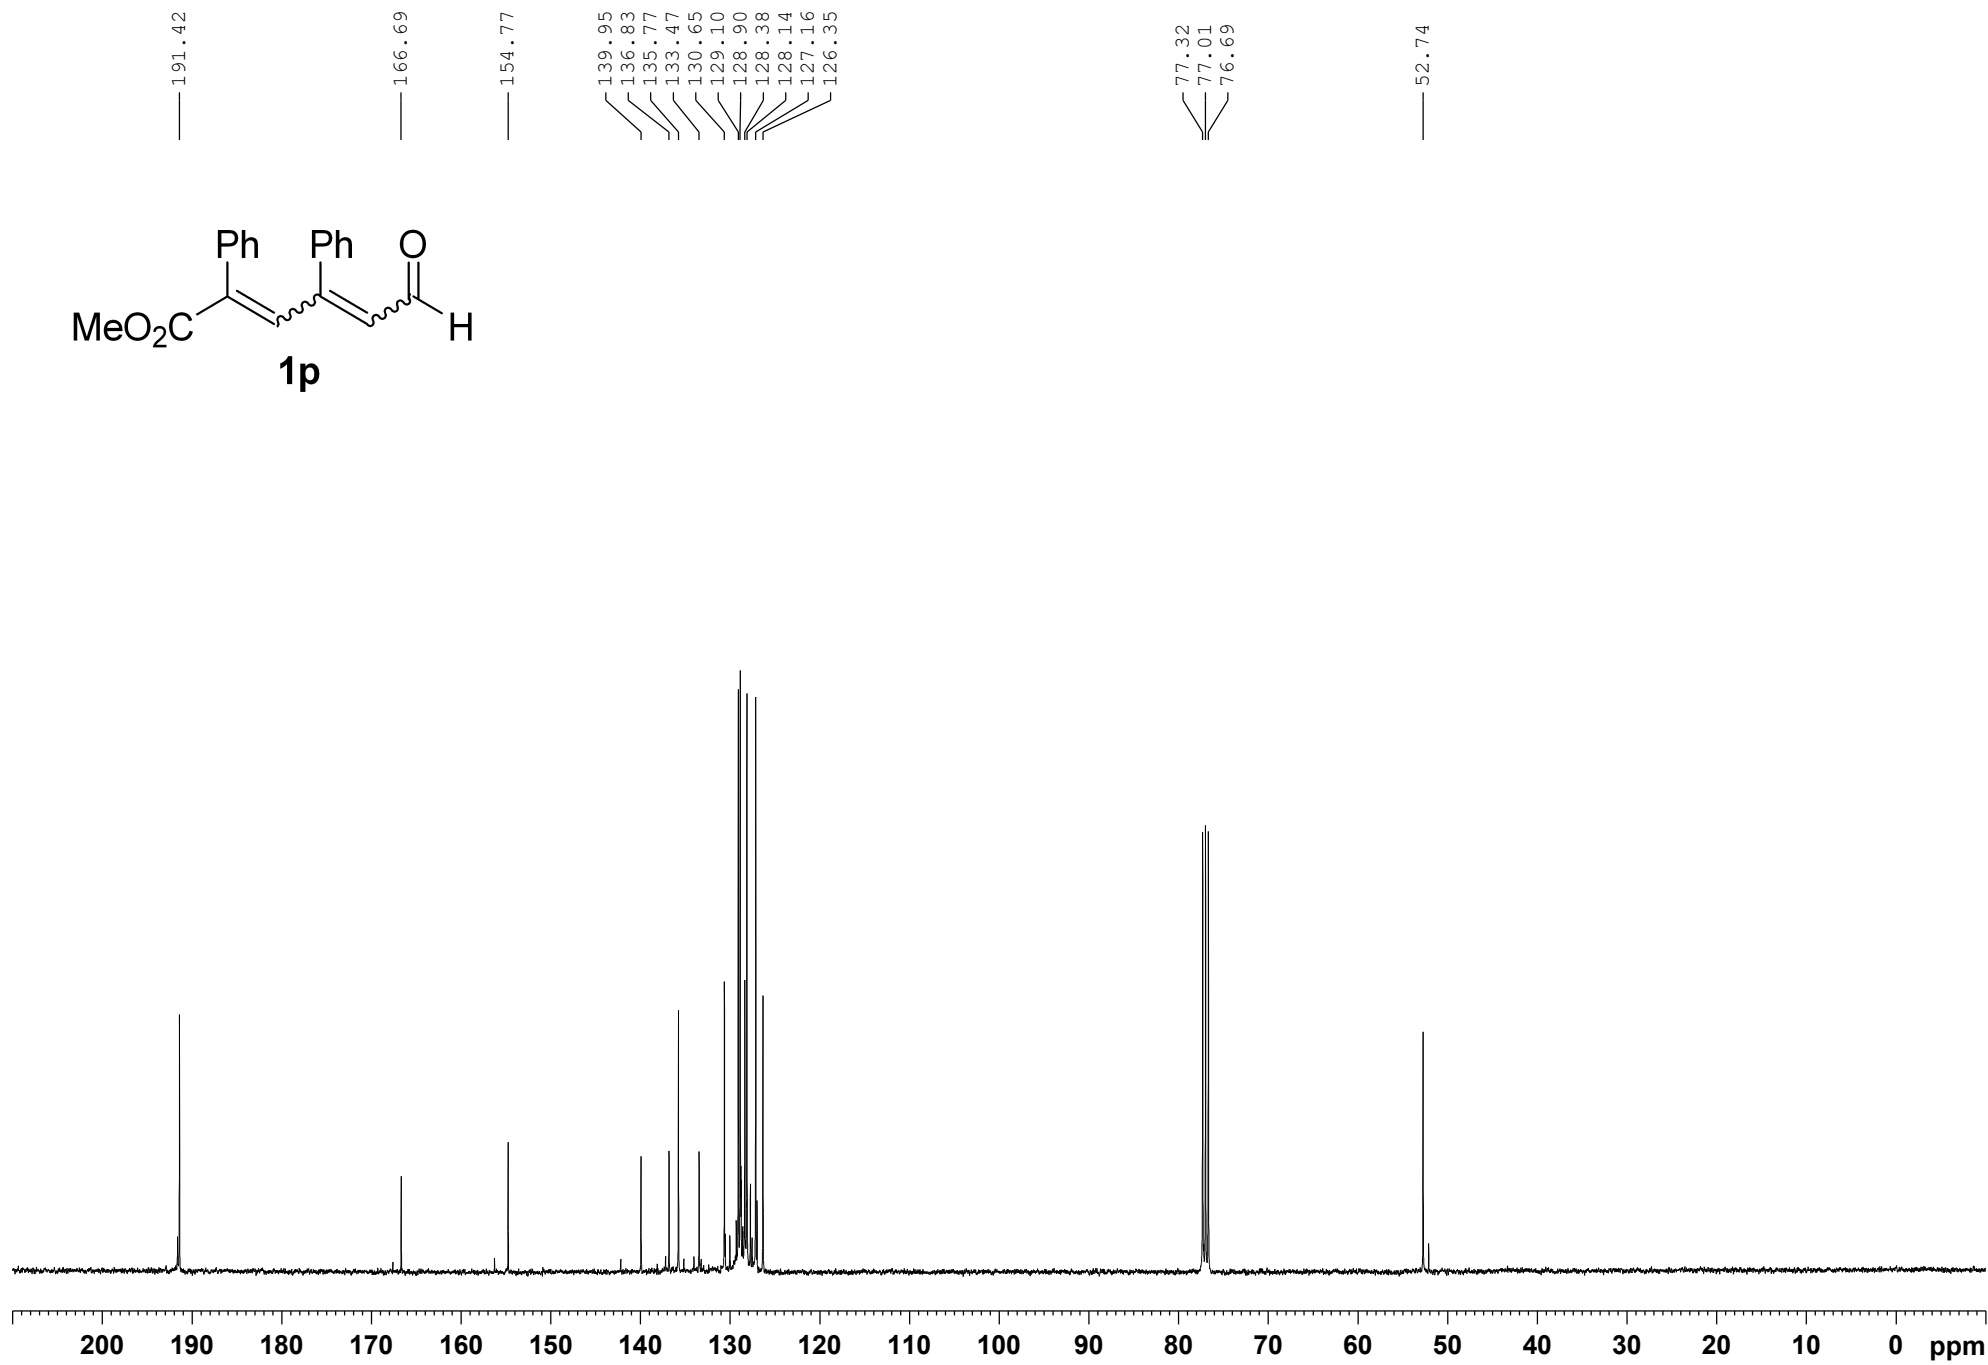



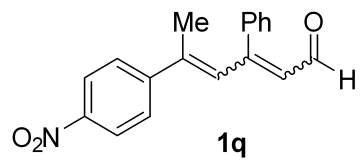

9.922  
9.902

8.286  
8.265  
7.731  
7.709  
7.582  
7.577  
7.561  
7.557  
7.482  
7.472  
7.465  
7.448  
7.431  
7.263  
6.874  
6.600  
6.597  
6.580  
6.577

2.116  
2.113

0.000

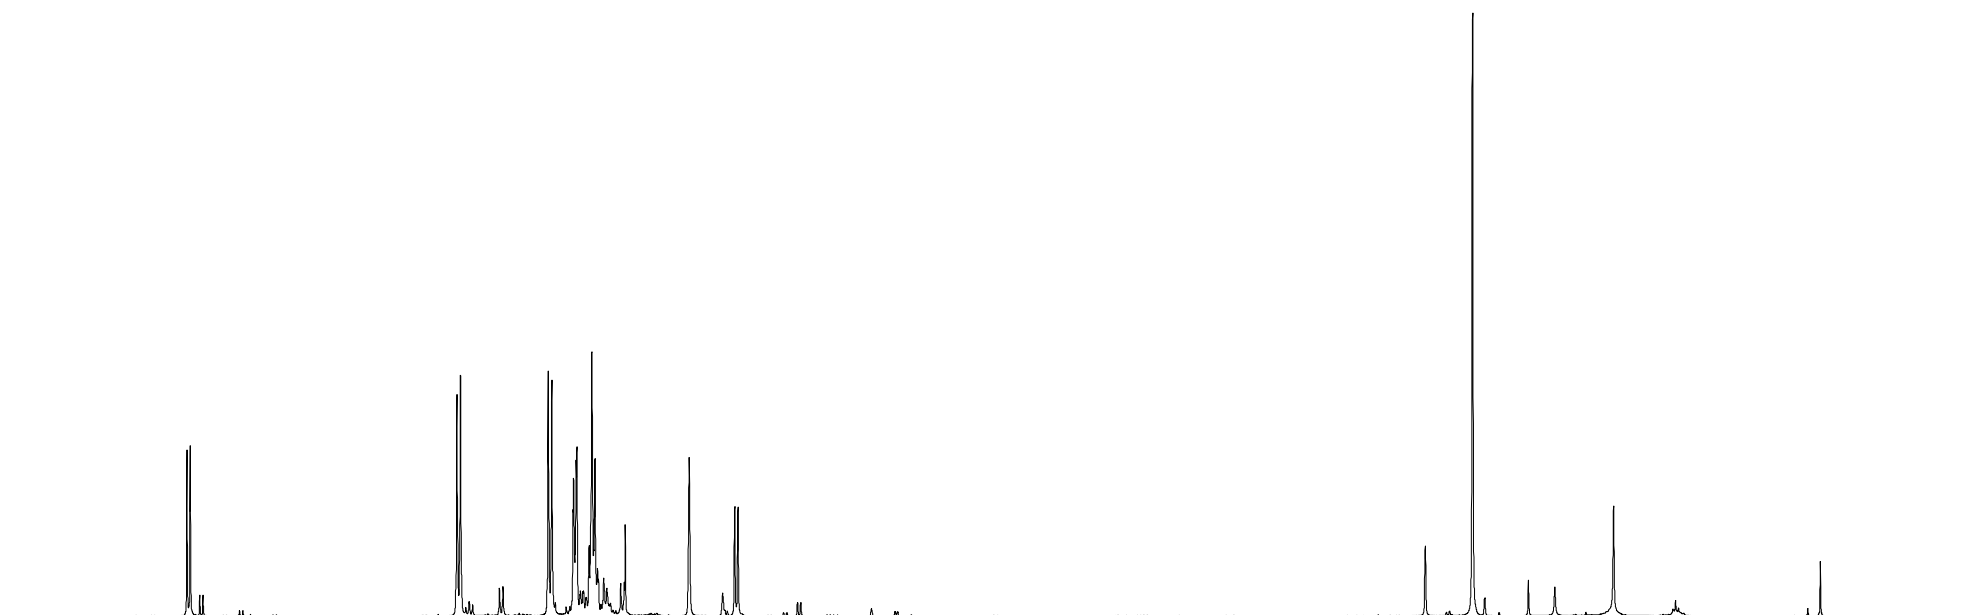

10.5

1.00

9.0

2.04

2.20

2.11

3.35

7.0

1.04

6.5

1.04

4.5

5.0

6.0

3.0

3.16

2.5

1.5

0.5

0.0

ppm

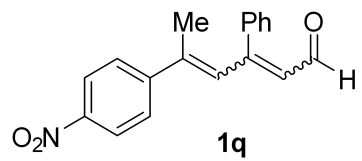

— 192.44

— 156.92

147.70

147.50

— 141.98

— 137.35

130.86

129.05

127.30

127.22

126.74

125.73

123.92

77.32

76.99

76.68

— 17.73

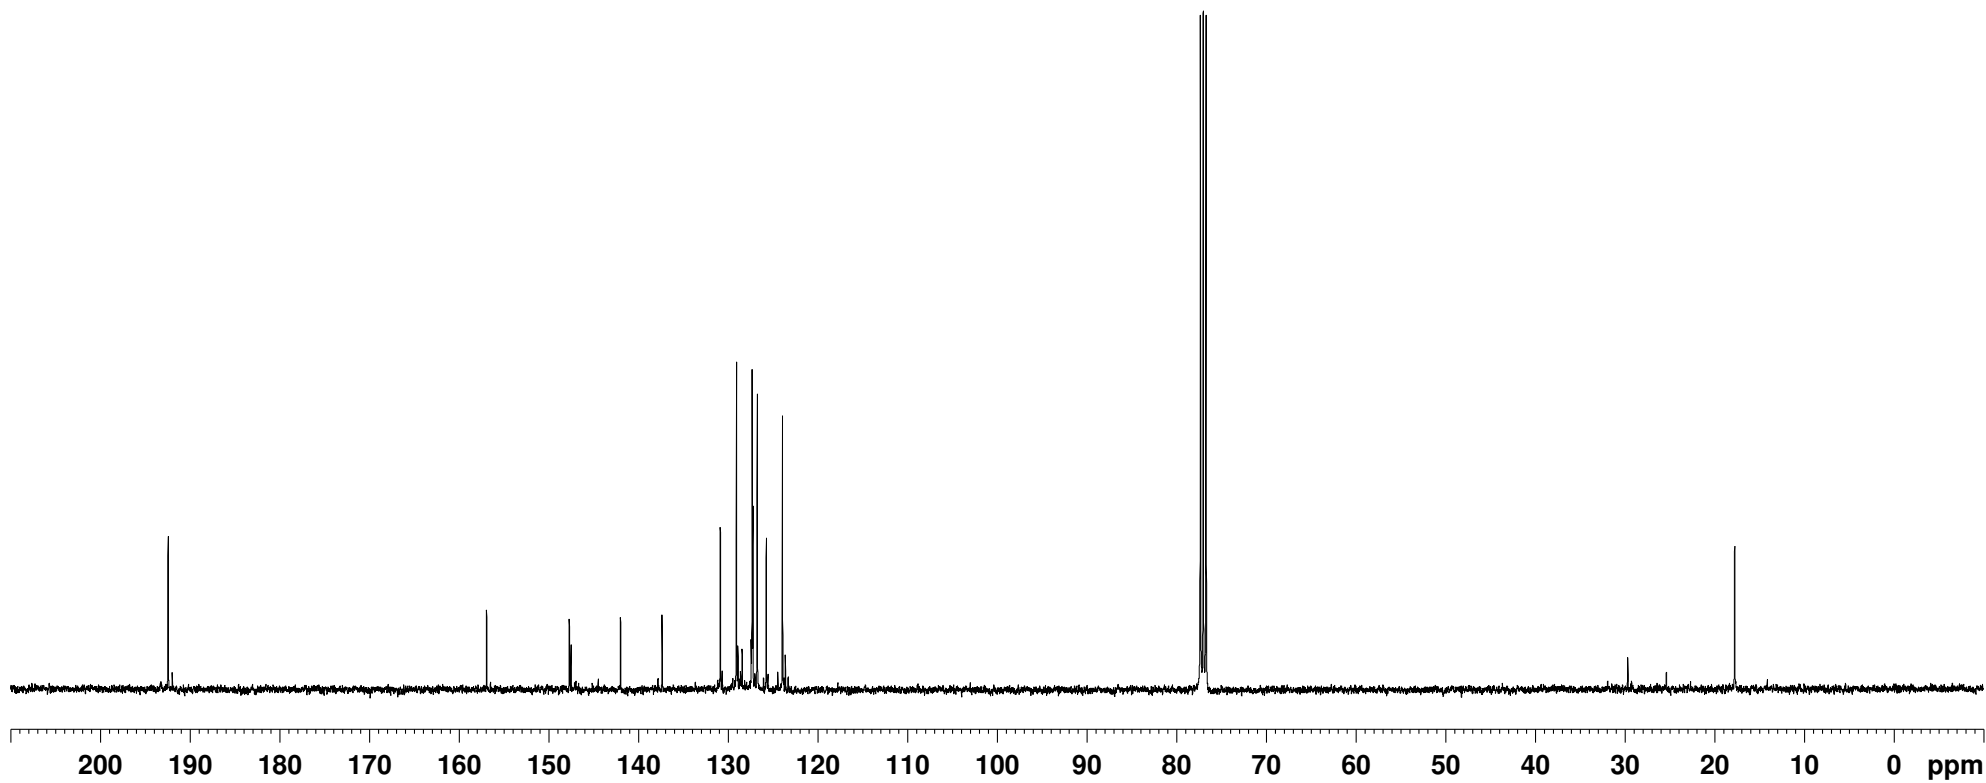

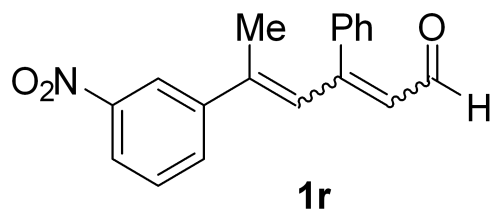

9.926  
9.906

8.423  
8.236  
8.216  
7.906  
7.887  
7.628  
7.608  
7.587  
7.567  
7.564  
7.481  
7.466  
7.447  
7.263  
6.858  
6.599  
6.580

2.128

0.000

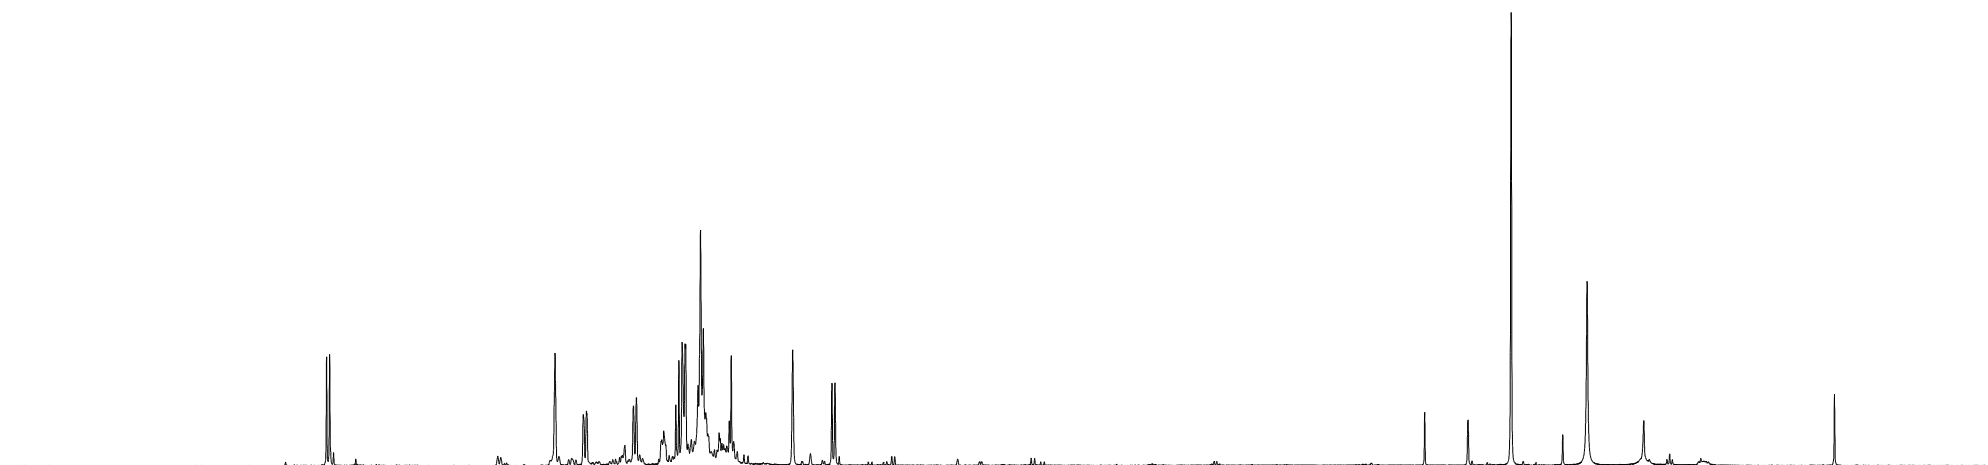

11

10

9

8

7

6

5

4

3

2

1

0

ppm

0.93

1.01

0.94

1.06

3.21

3.83

0.97

1.00

2.87

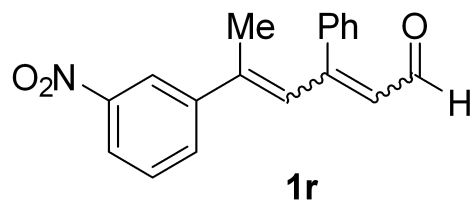

192.50

157.02

148.51

143.04

141.70

137.45

131.76

130.82

129.64

129.04

127.33

127.21

124.71

122.98

120.80

77.33

77.01

76.69

17.75

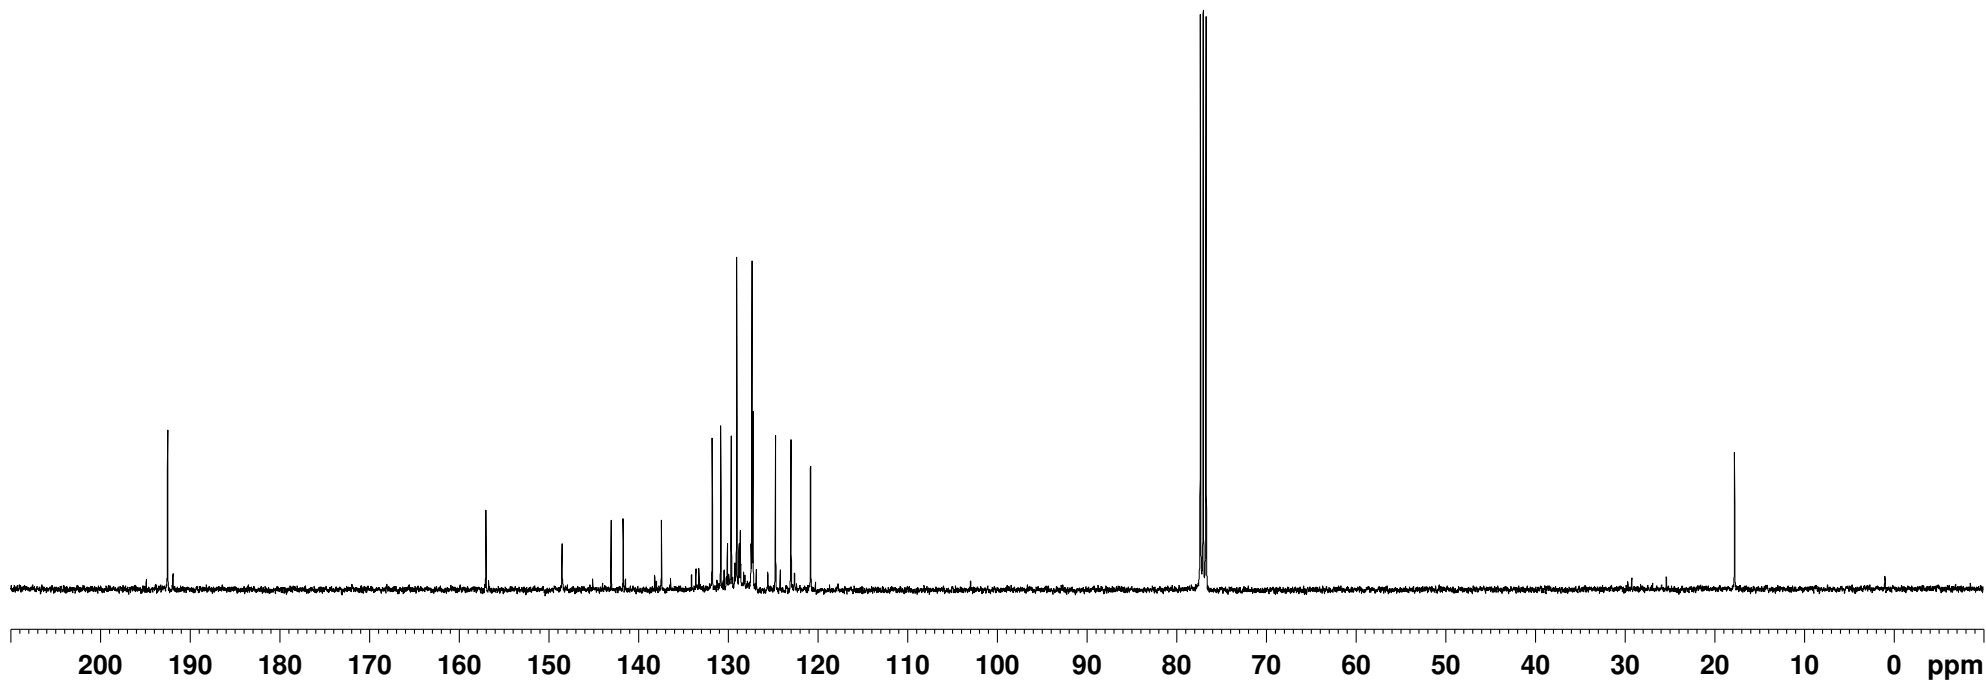

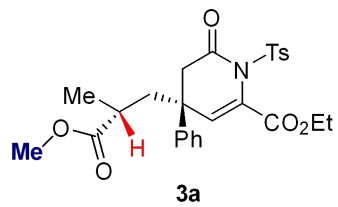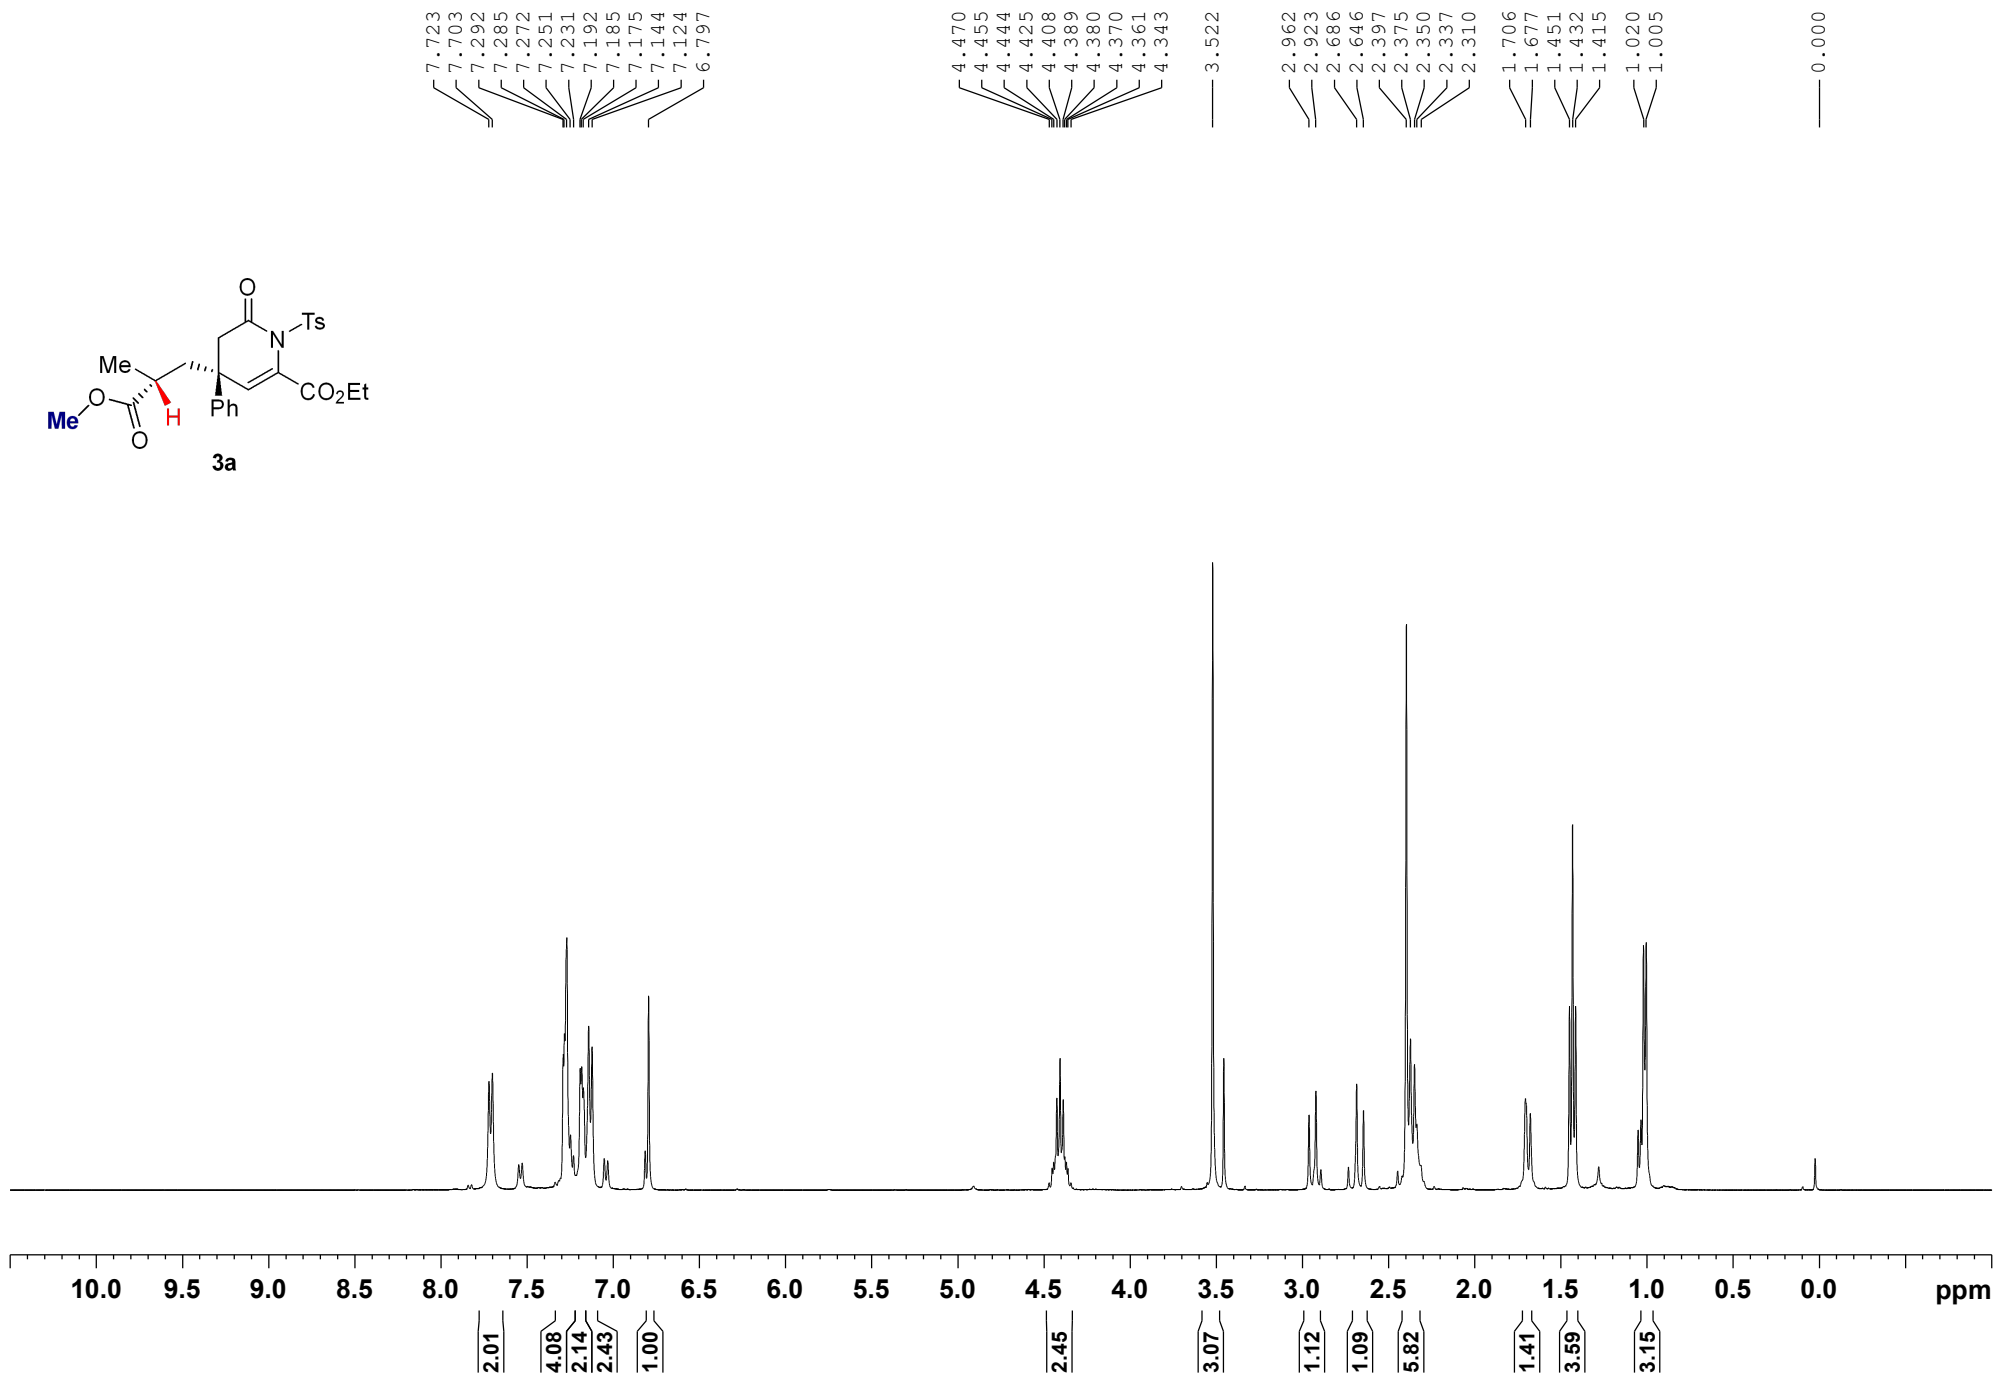

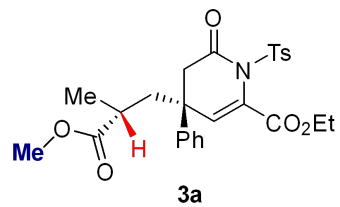

— 176.19  
 — 168.67  
 — 163.04

— 144.77  
 — 141.09  
 — 134.92  
 — 132.34  
 — 131.42  
 — 129.28  
 — 128.92  
 — 128.88  
 — 127.43  
 — 126.26

77.30  
 76.98  
 76.66

— 62.18

— 51.79

44.88  
 44.61  
 42.14

— 35.70

— 21.57  
 — 19.50

— 13.94

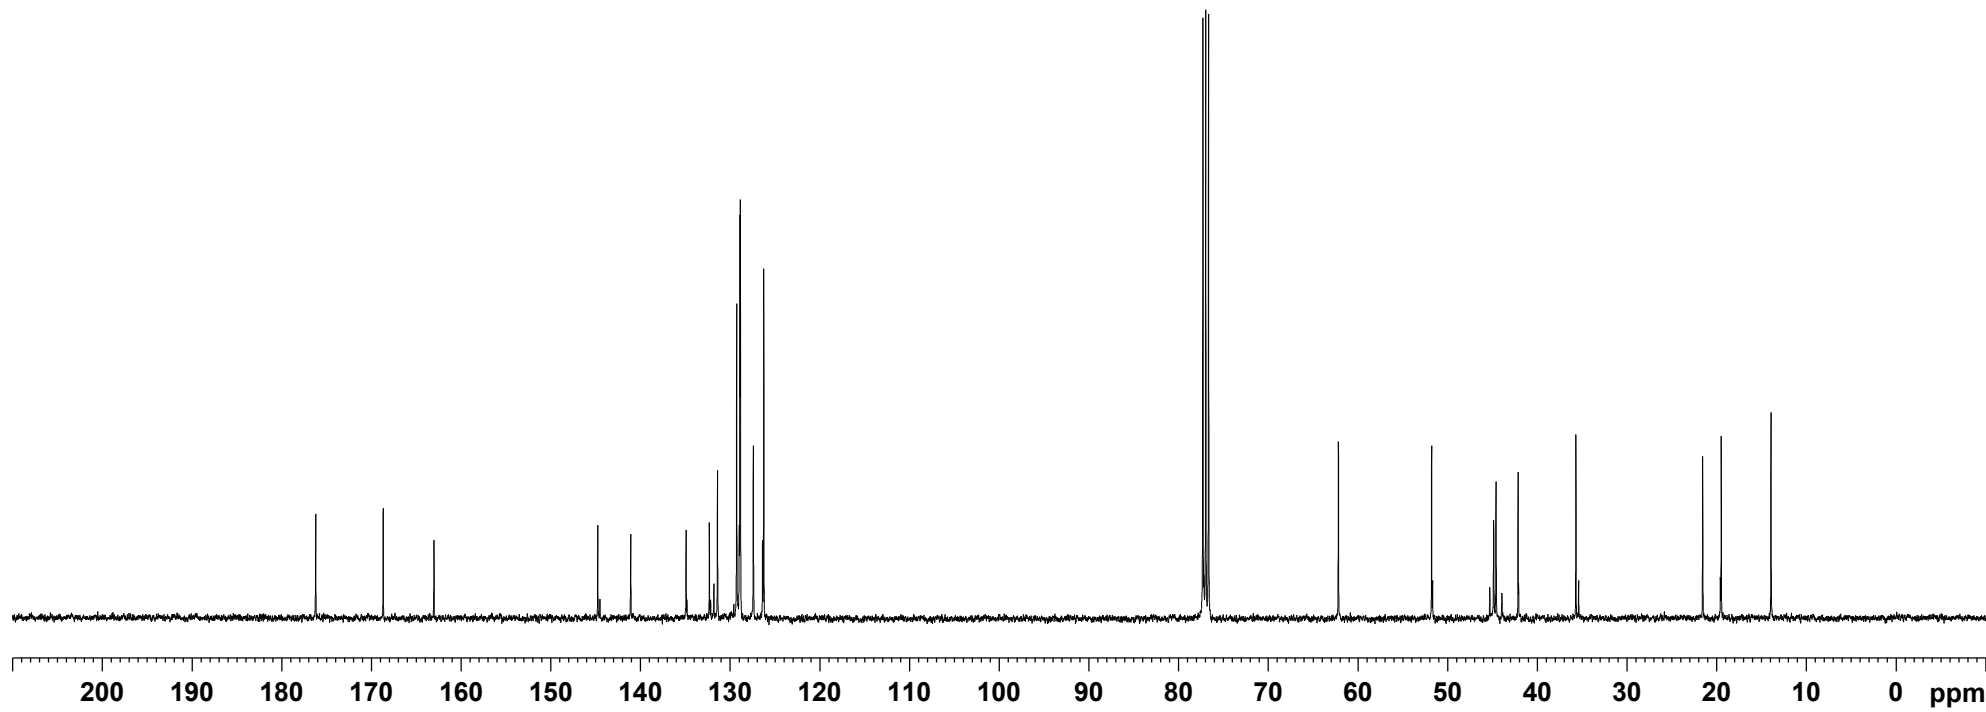

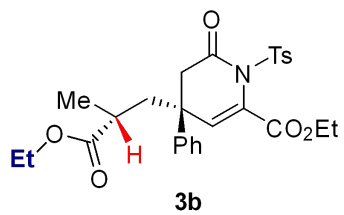

7.656  
7.643  
7.265  
7.250  
7.245  
7.241  
7.163  
7.158  
7.152  
7.093  
7.080  
6.785

4.415  
4.409  
4.403  
4.397  
4.385  
4.382  
4.370  
4.364  
4.358  
4.352  
3.946  
3.934  
3.922  
3.911  
2.942  
2.916  
2.658  
2.631  
2.365  
2.294  
2.286  
2.282  
2.271  
2.259  
1.657  
1.653  
1.633  
1.629  
1.621  
1.420  
1.408  
1.396  
1.196  
1.184  
1.172  
0.986  
0.974  
0.000

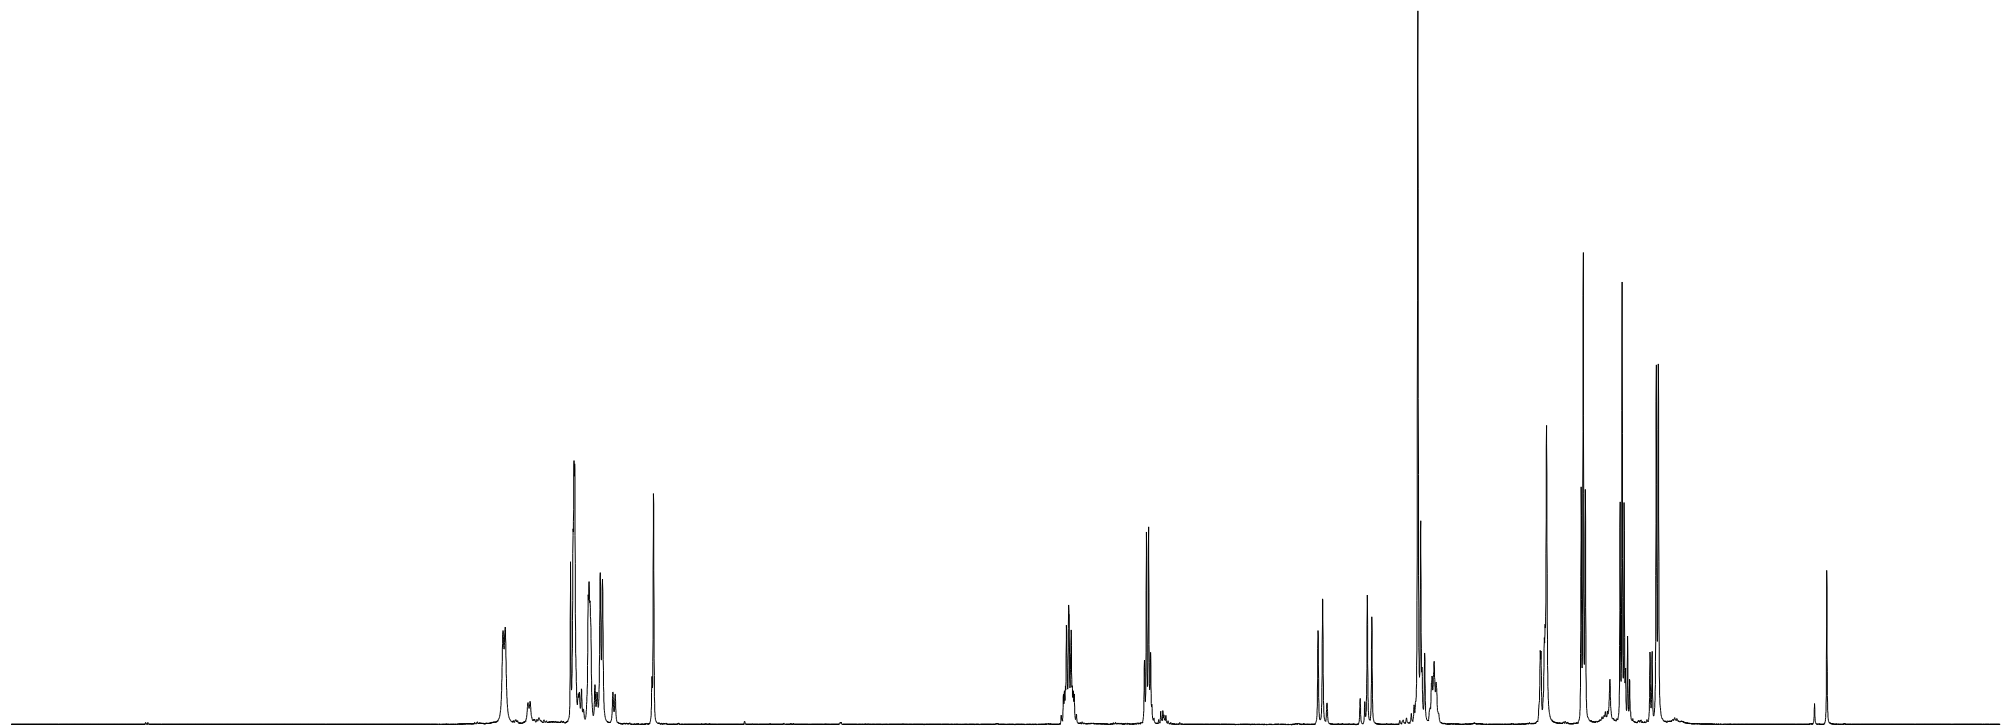

10.0 9.5 9.0 8.5 8.0 7.5 7.0 6.5 6.0 5.5 5.0 4.5 4.0 3.5 3.0 2.5 2.0 1.5 1.0 0.5 0.0 ppm

1.82  
3.13  
2.09  
2.00  
1.22

2.38  
2.24

1.12  
1.03  
3.30  
1.30

3.16  
3.66  
3.05  
3.14

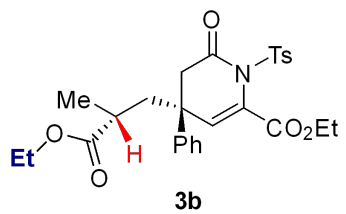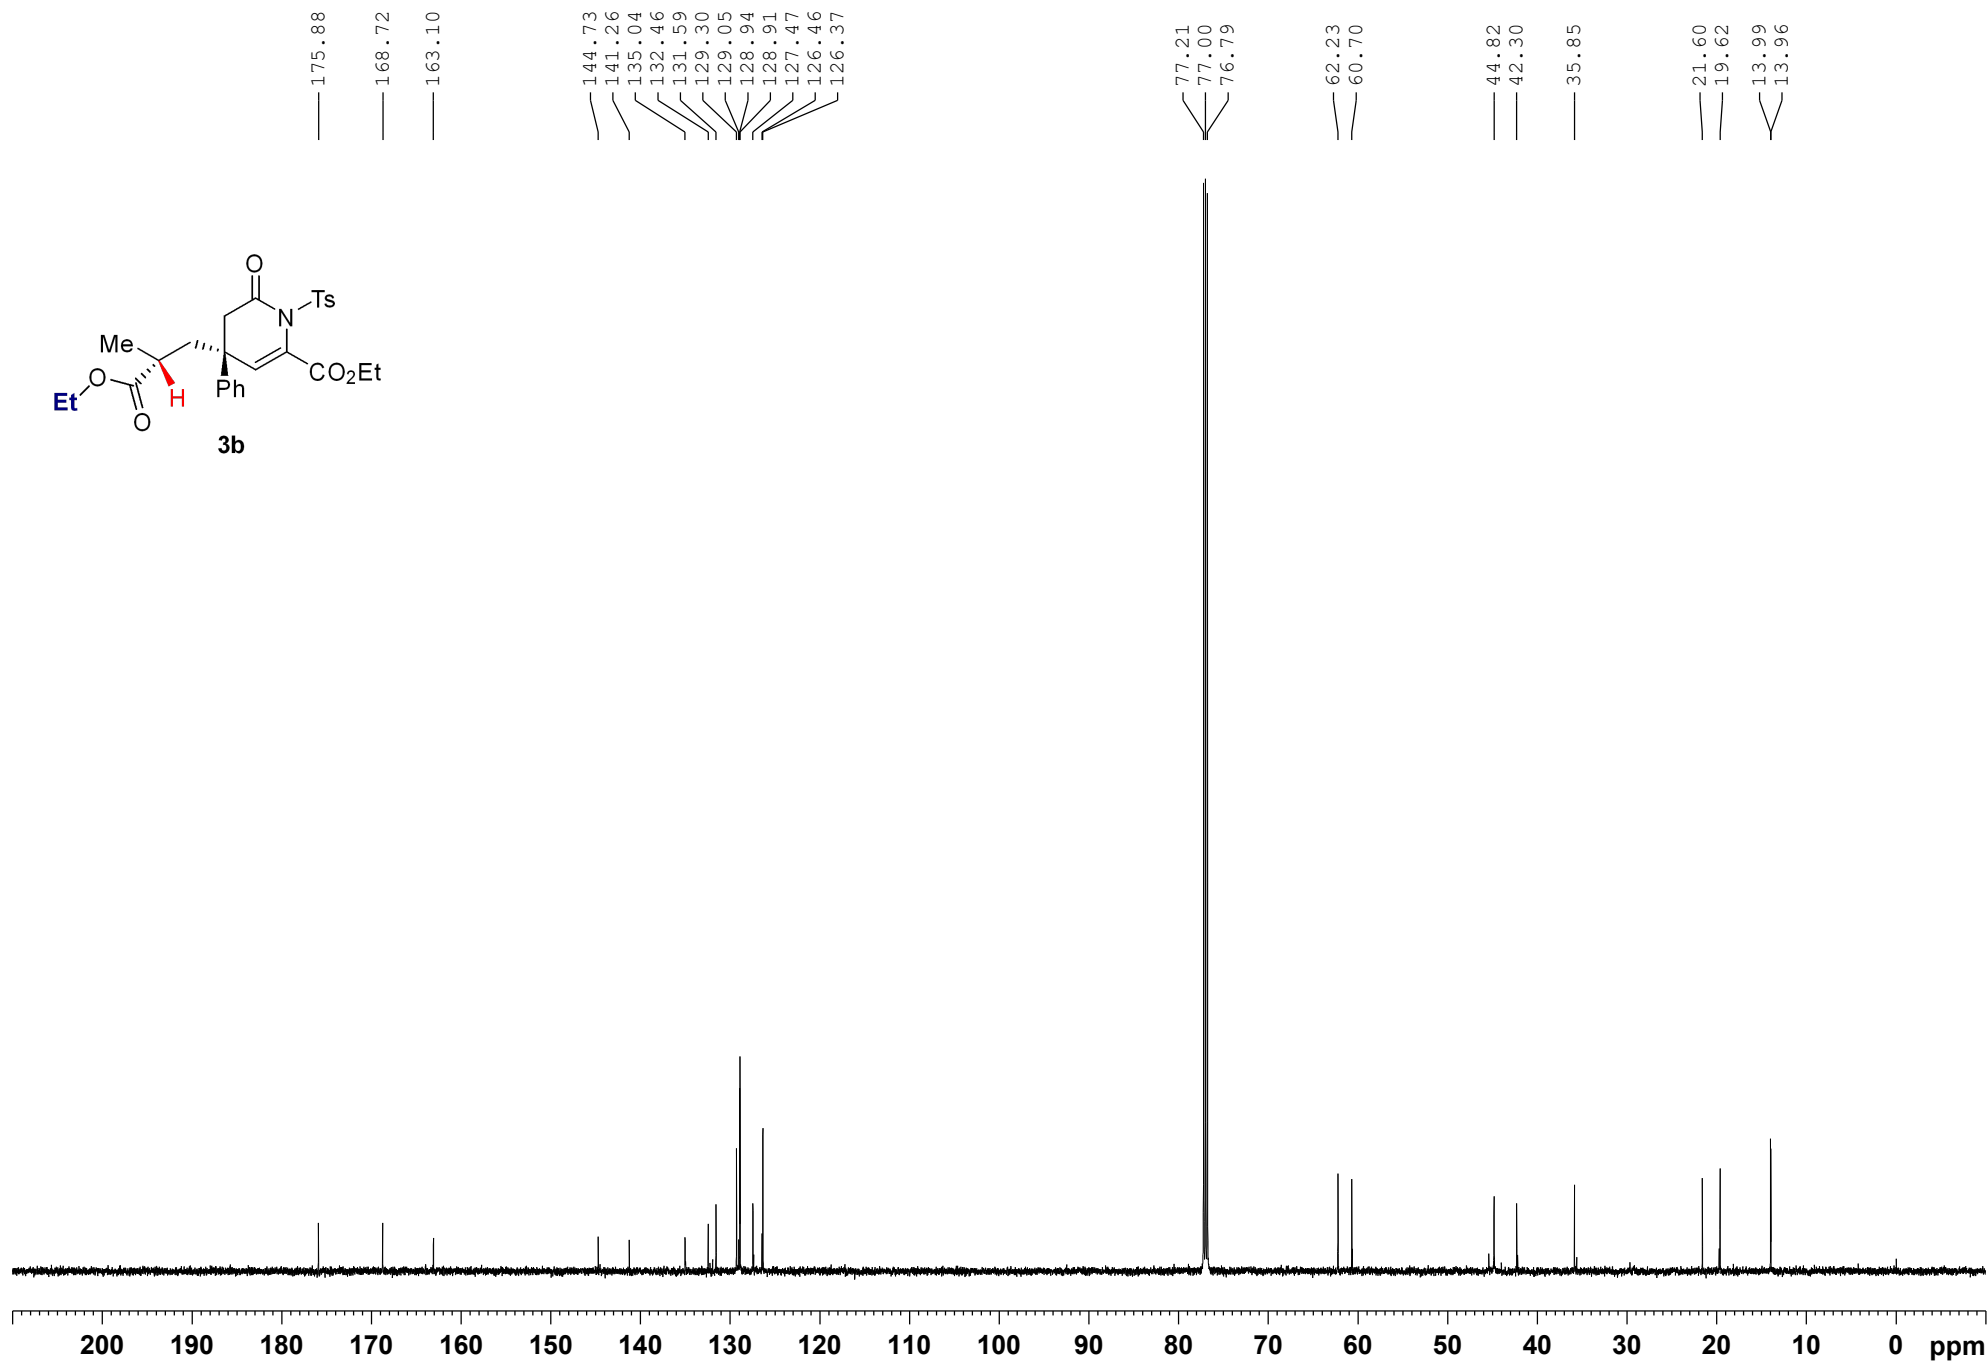



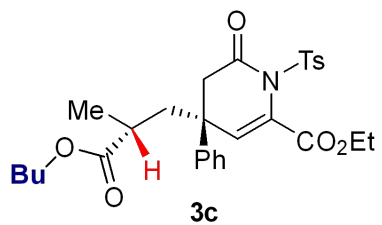

7.647  
7.635  
7.266  
7.245  
7.240  
7.236  
7.159  
7.155  
7.149  
7.087  
7.073  
6.782

4.413  
4.407  
4.401  
4.395  
4.383  
4.370  
4.364  
4.358  
4.352  
3.907  
3.896  
3.889  
3.884  
3.877  
3.865  
3.854  
3.847  
3.836  
2.944  
2.917  
2.658  
2.631  
2.362  
2.303  
2.299  
2.292  
2.288  
2.276  
2.265  
1.666  
1.661  
1.648  
1.643  
1.629  
1.625  
1.553  
1.542  
1.530  
1.517  
1.504  
1.489  
1.419  
1.407  
1.395  
1.351  
1.339  
1.327  
1.314  
1.302  
1.290  
1.290  
0.981  
0.969  
0.928  
0.923  
0.915  
0.911  
0.903  
0.000

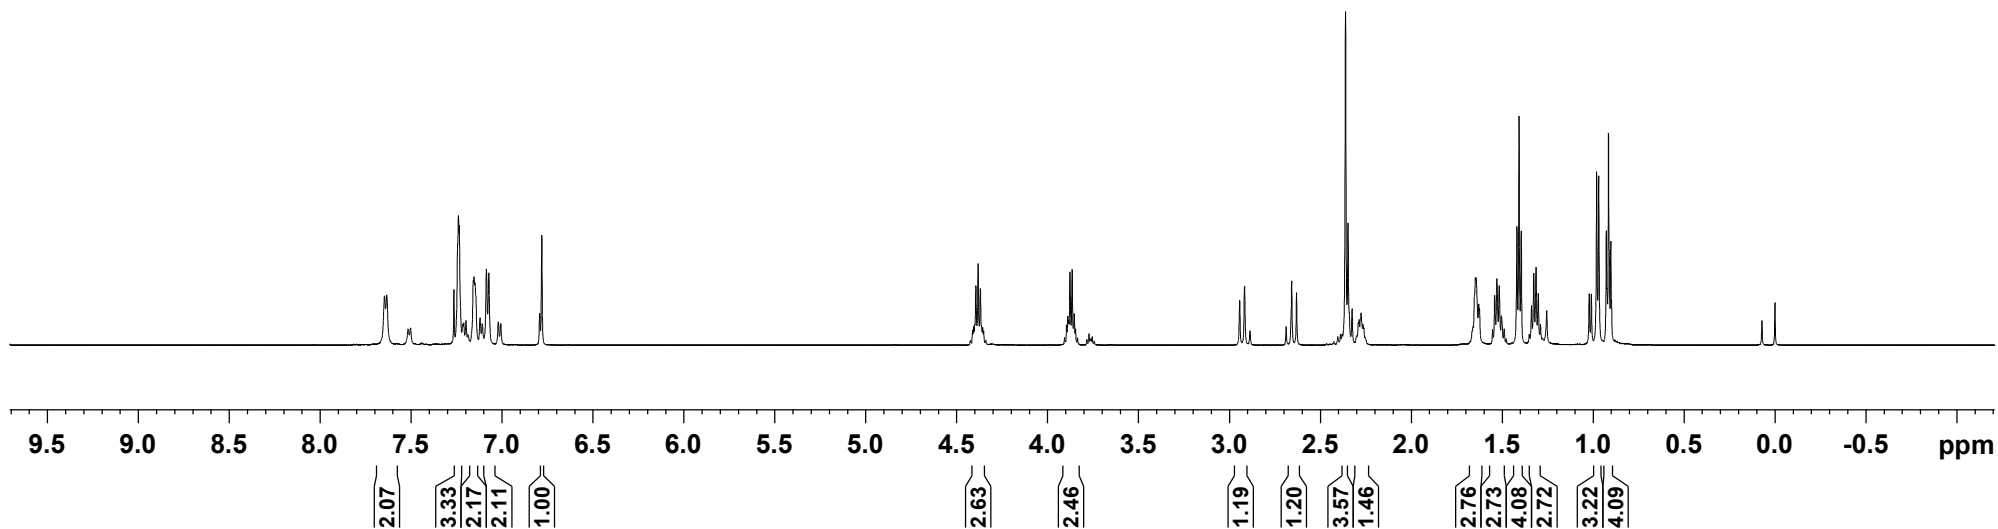

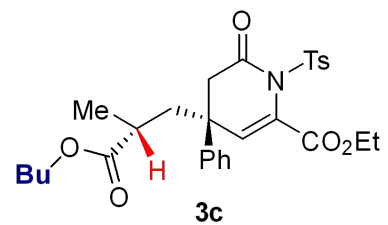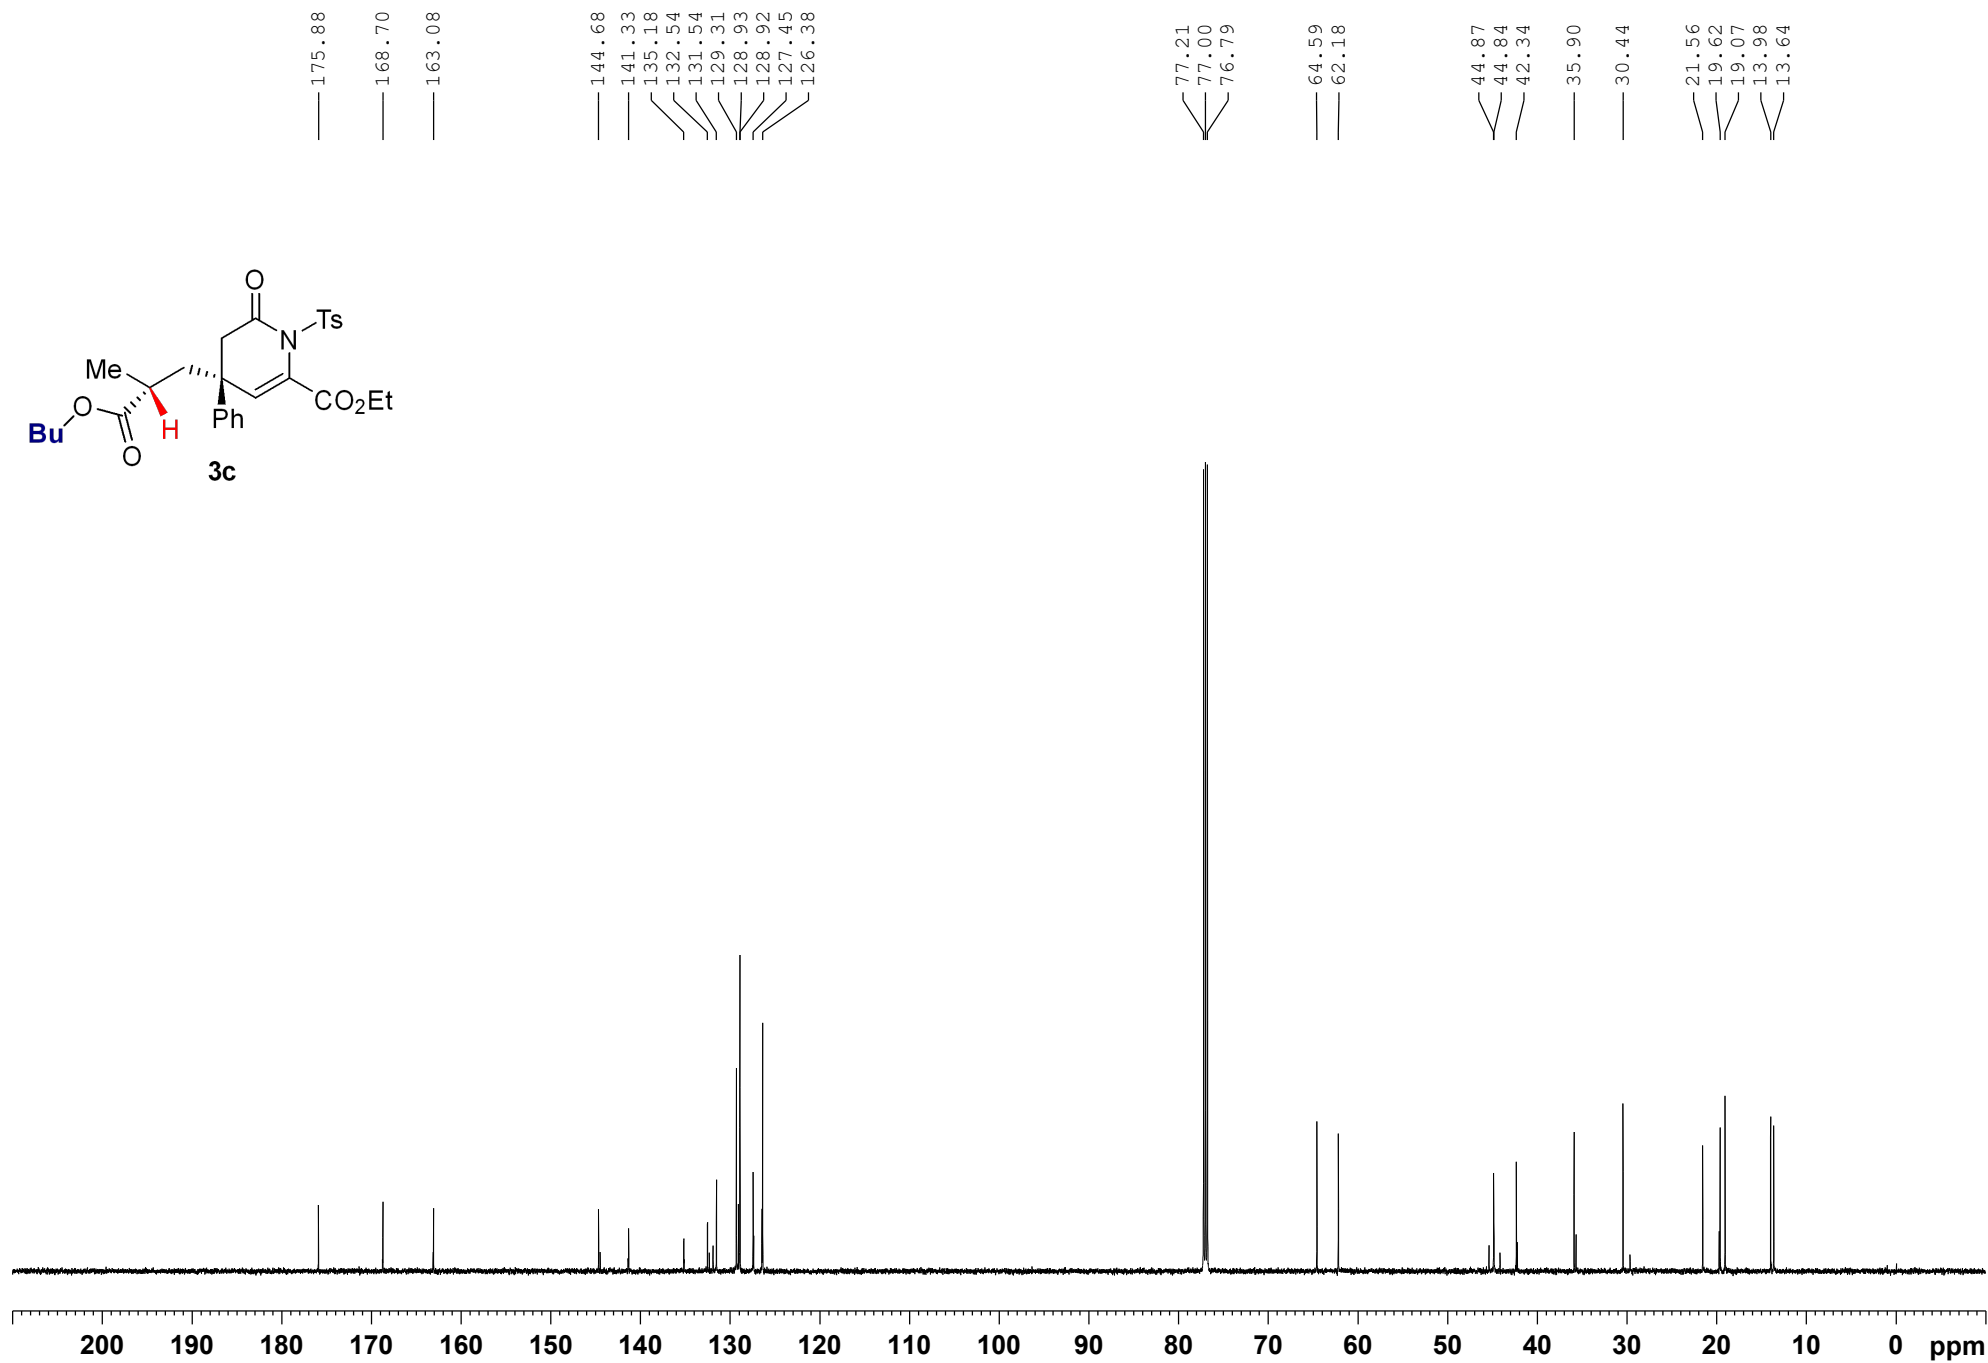

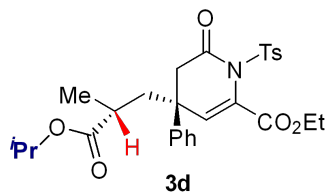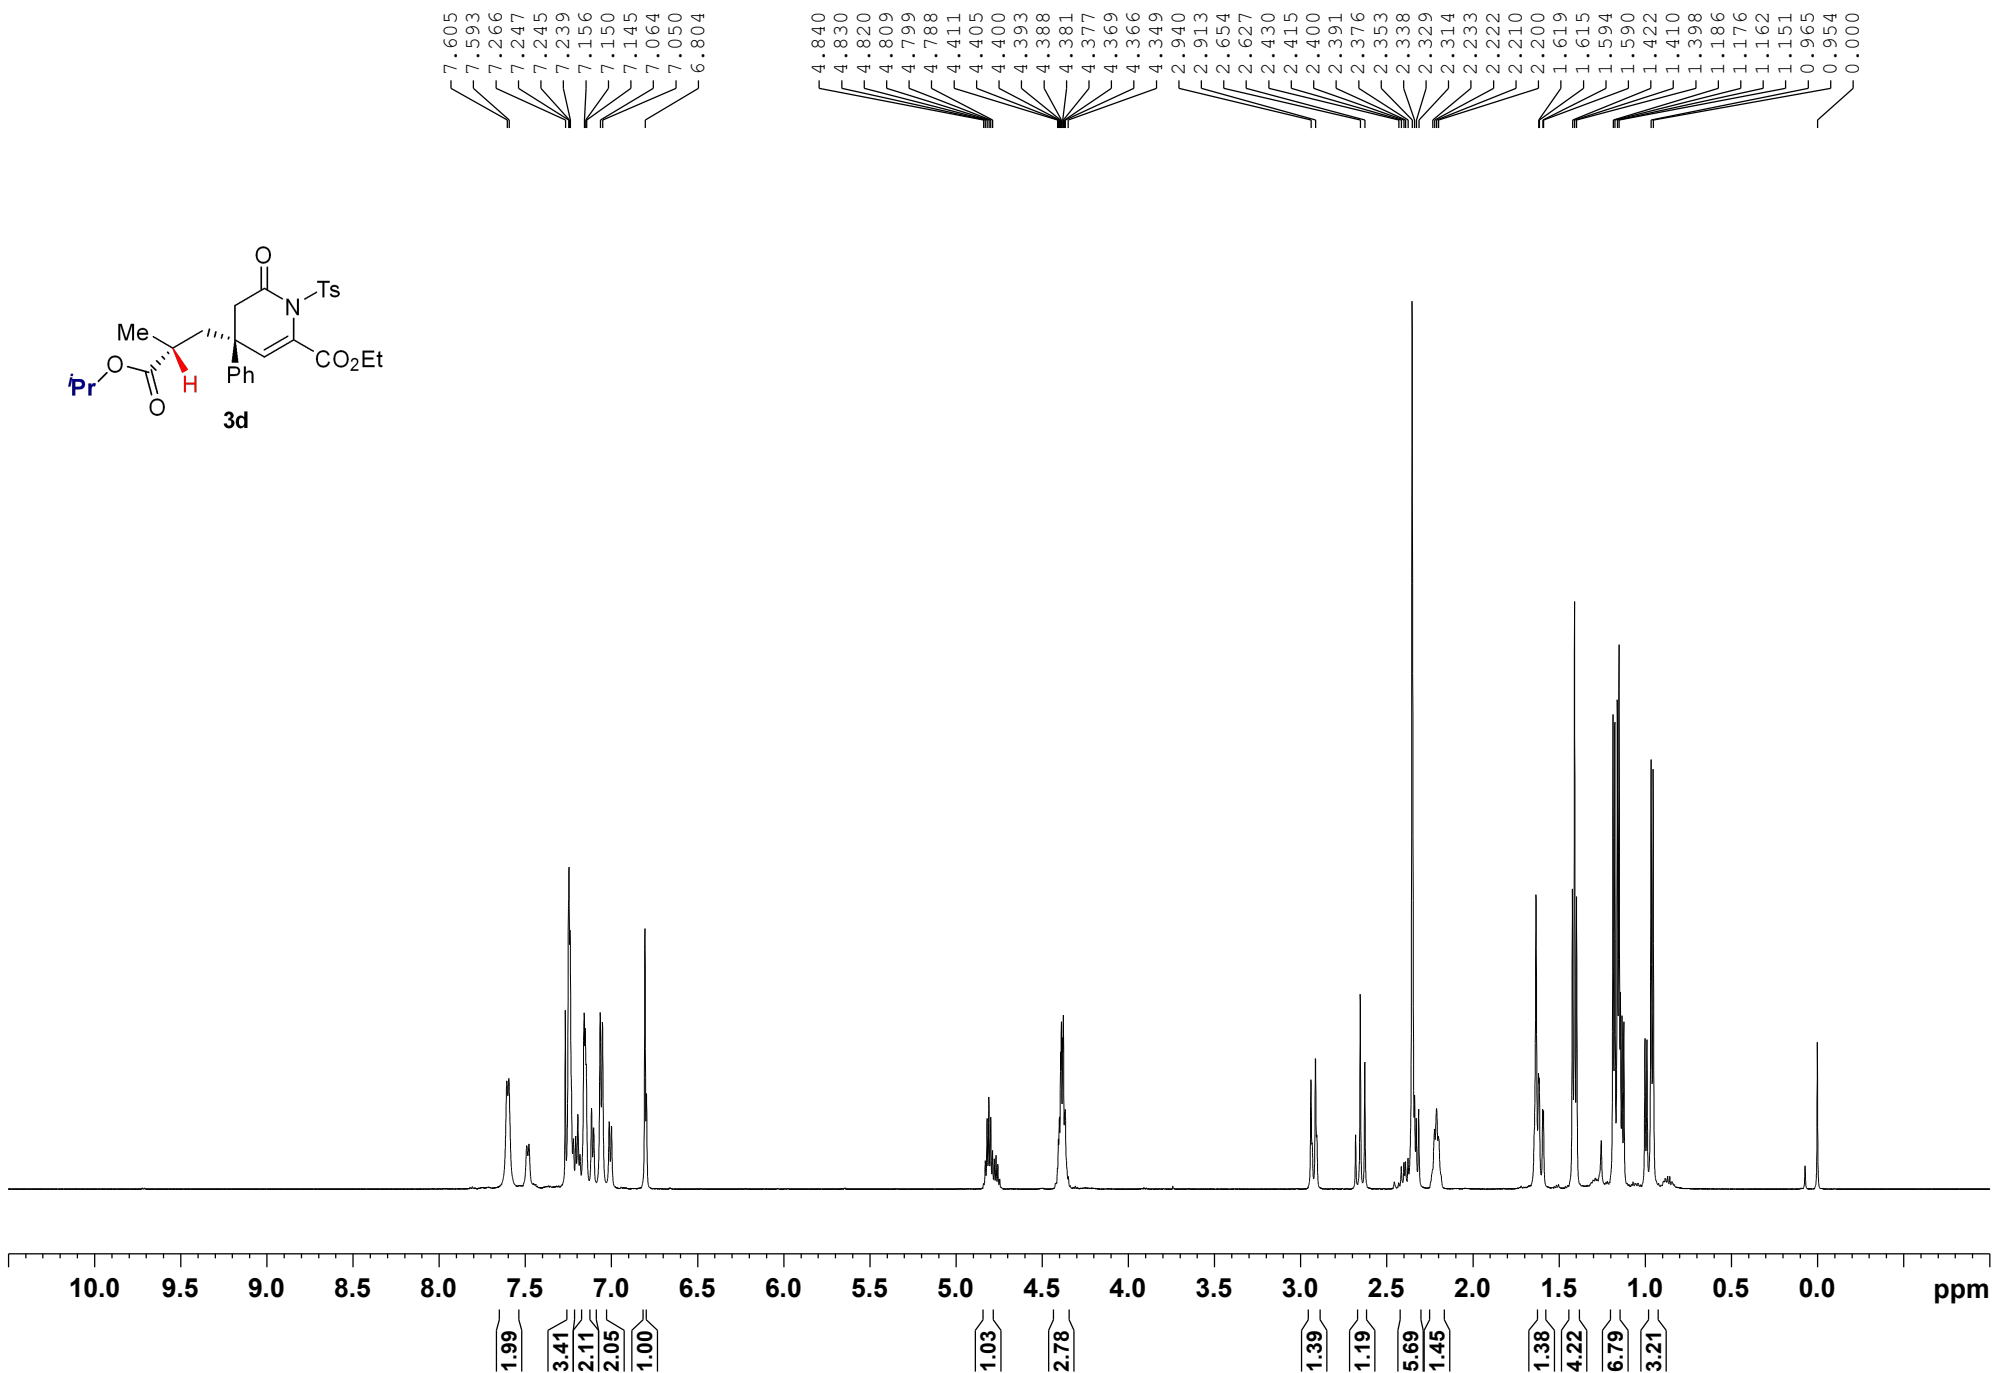

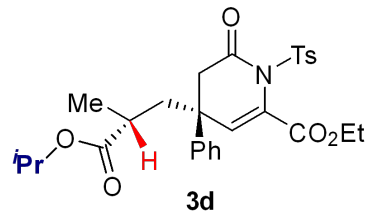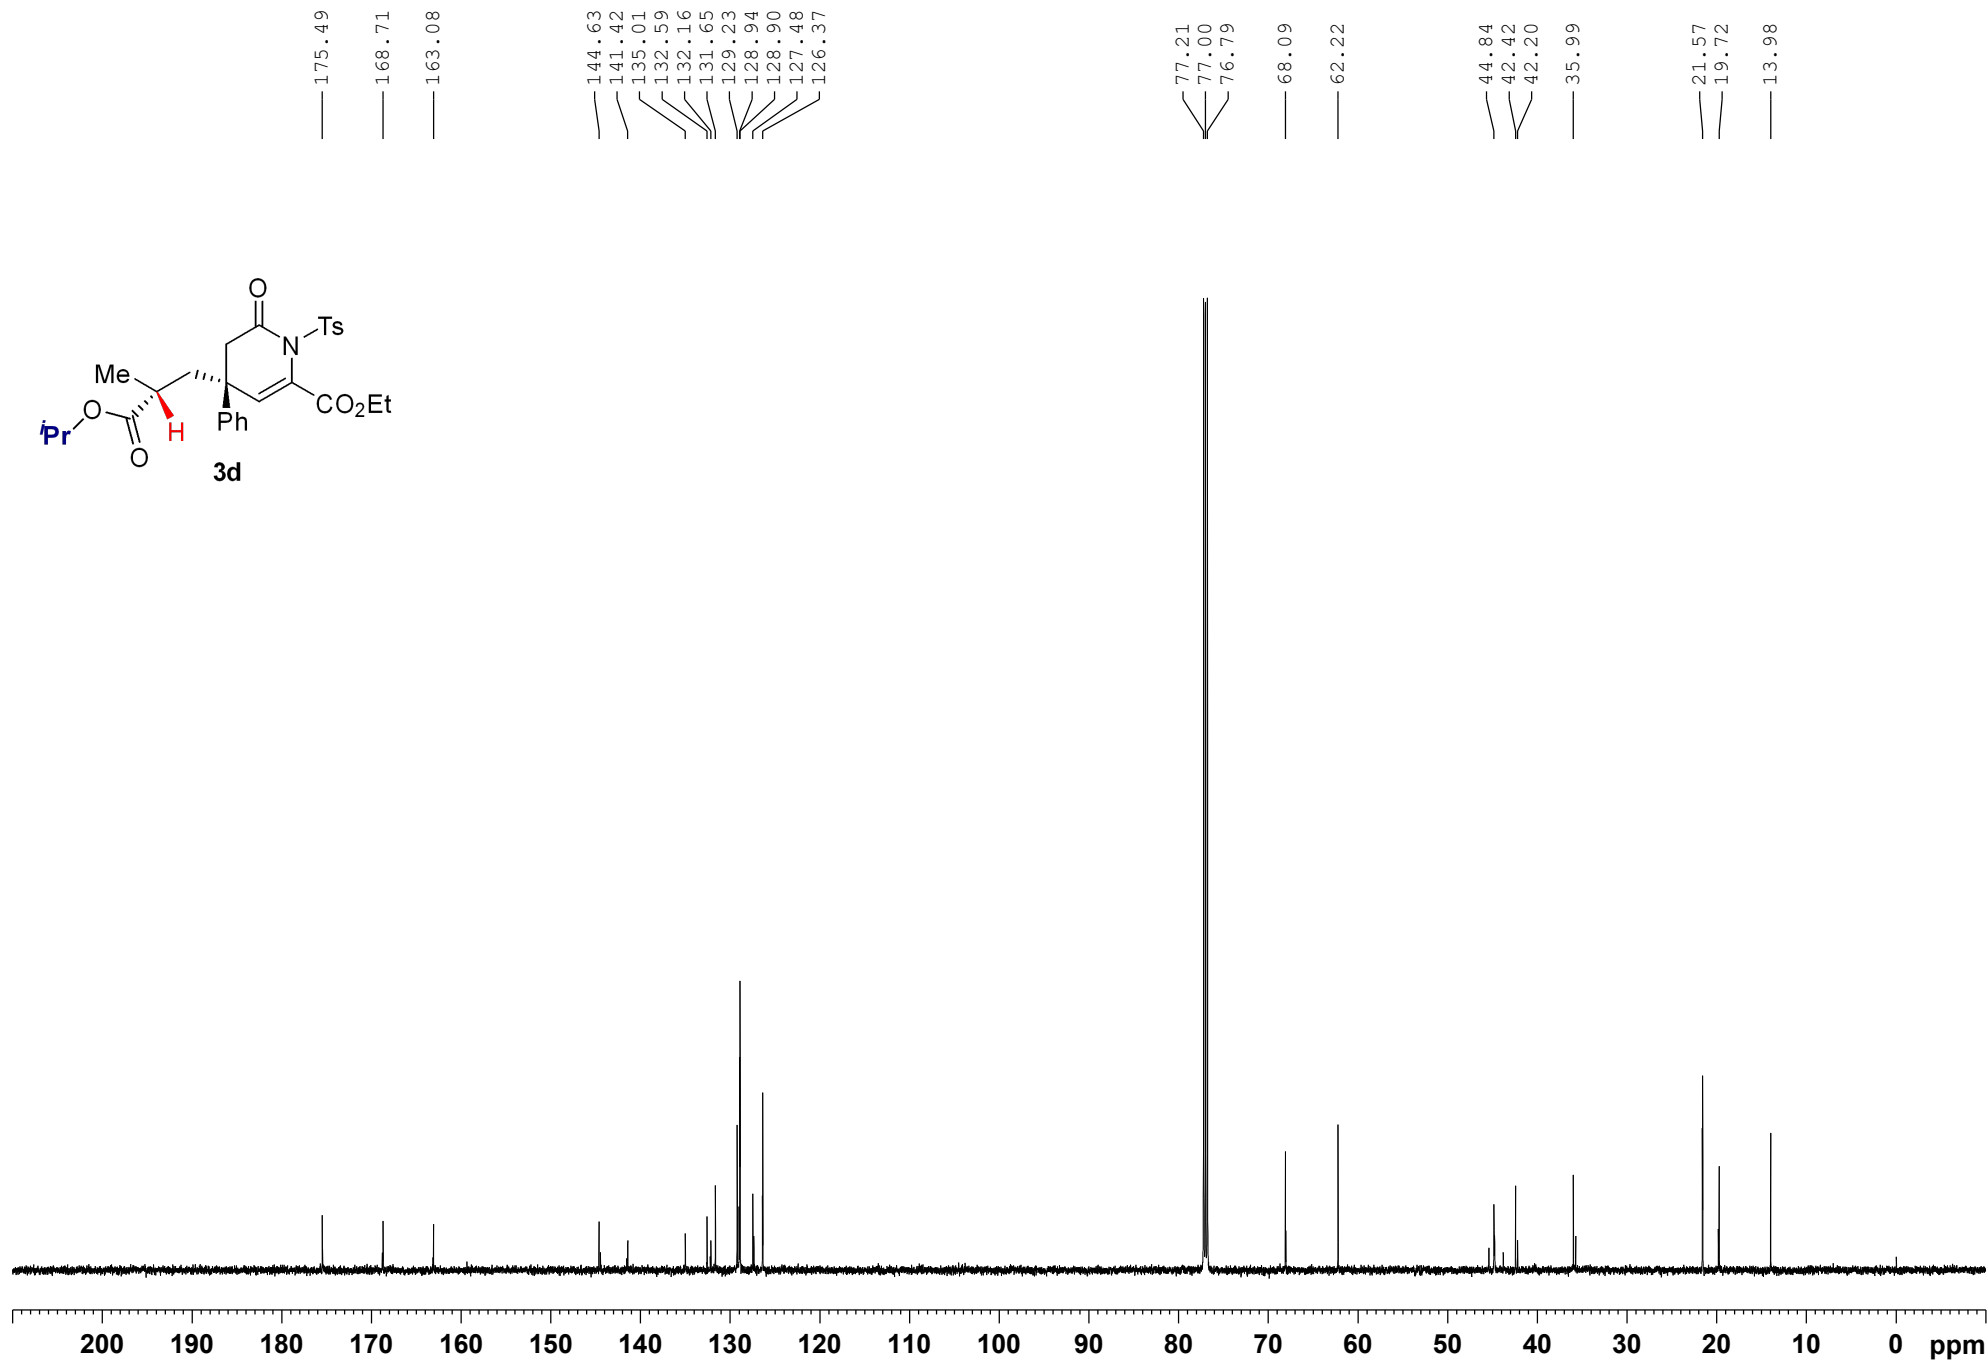

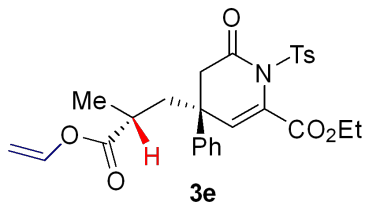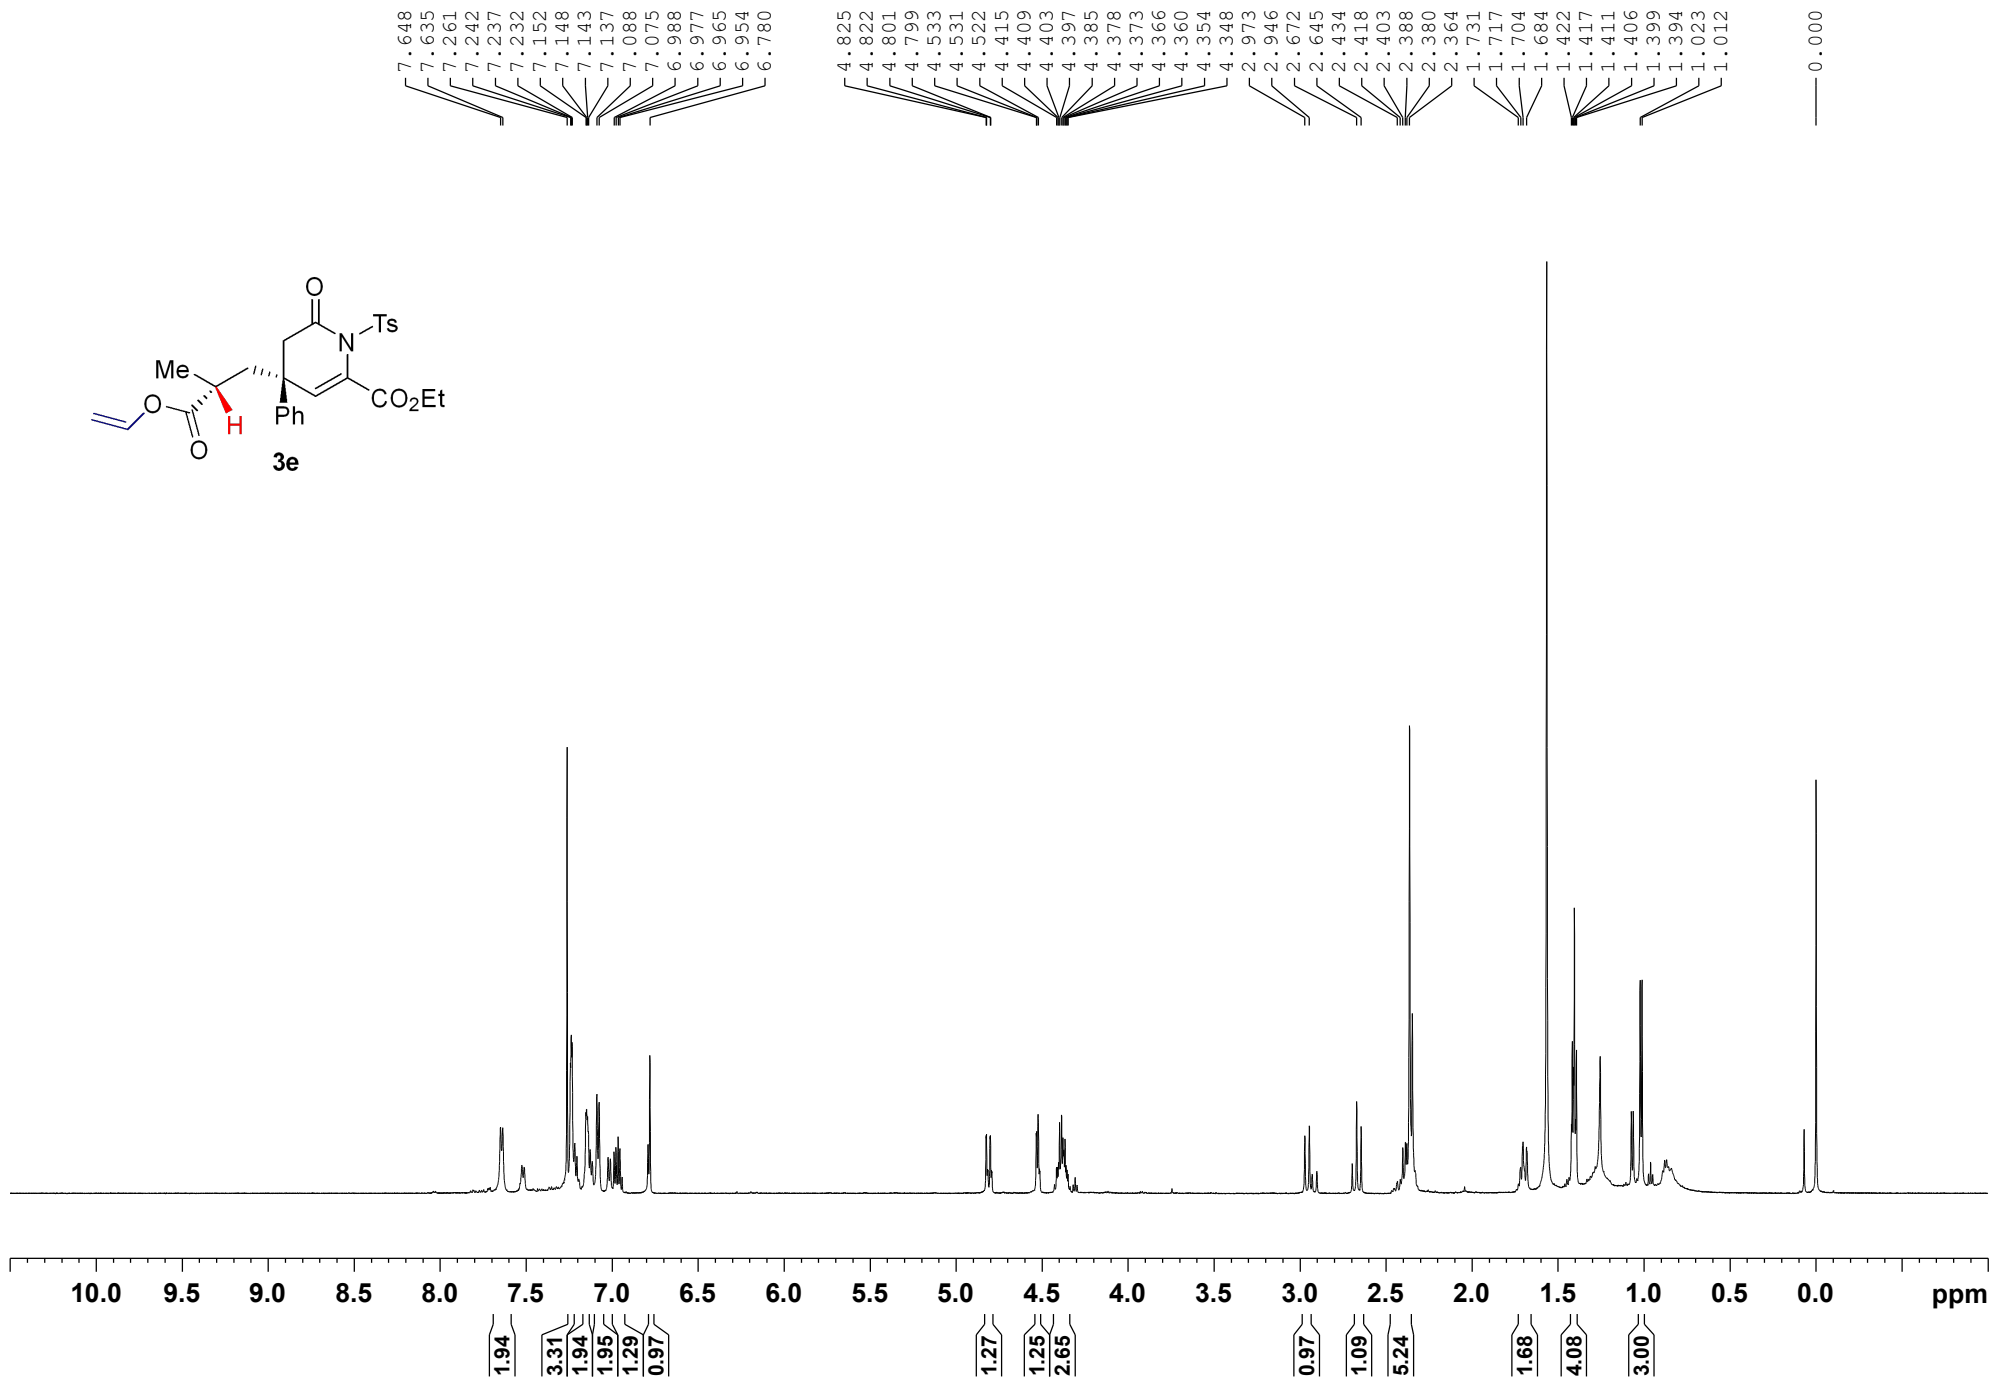

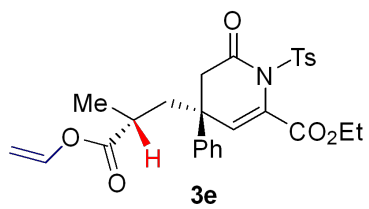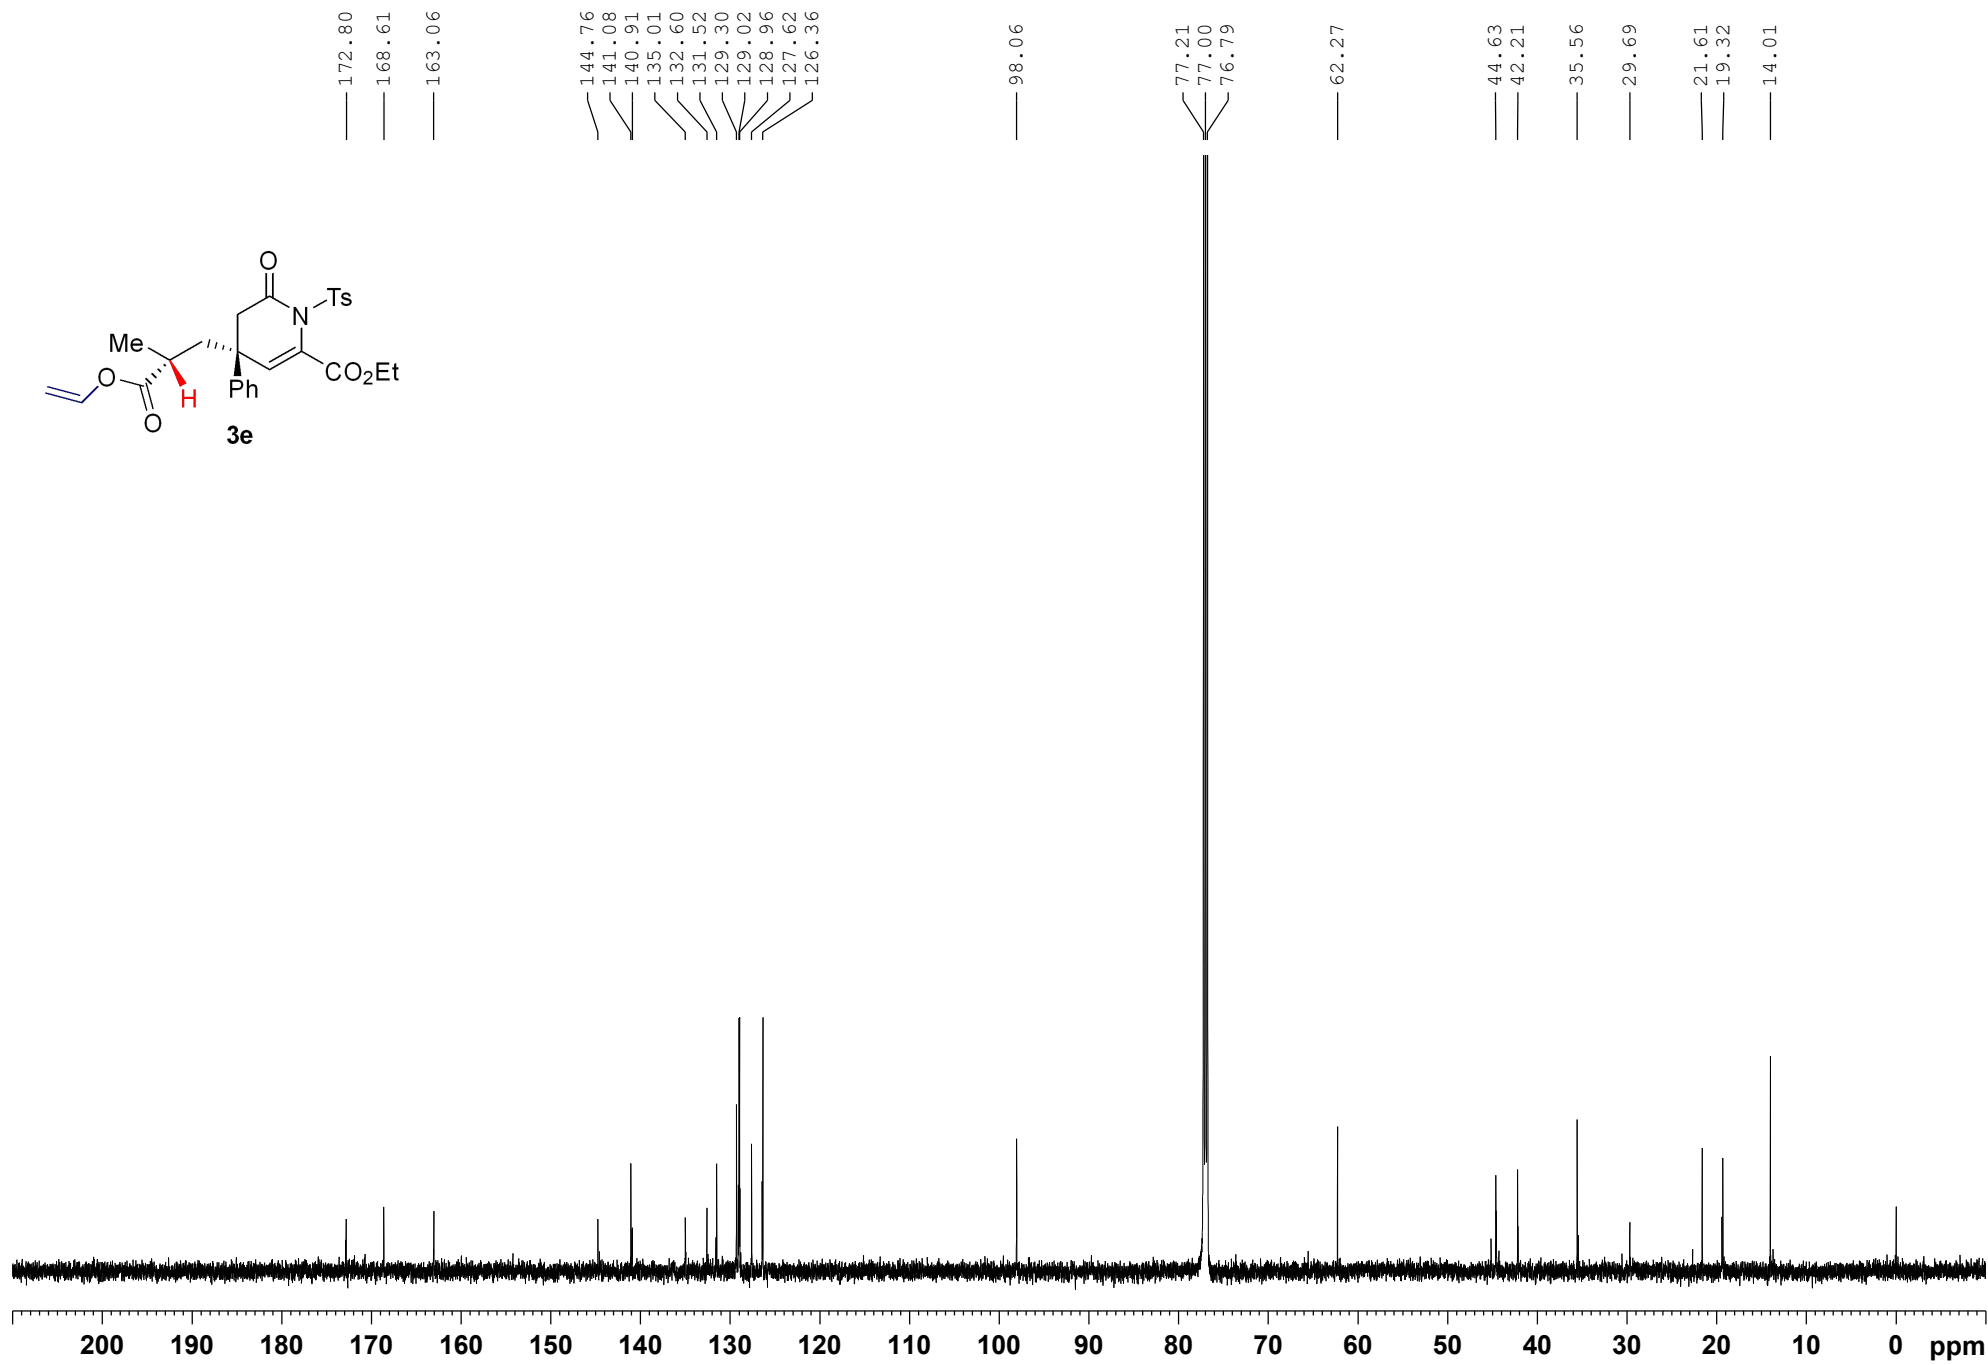

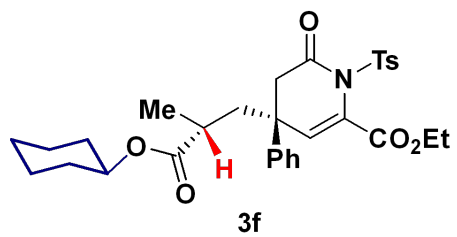

7.593  
7.581  
7.268  
7.242  
7.236  
7.234  
7.217  
7.156  
7.150  
7.143  
7.055  
7.042  
6.808

4.588  
4.582  
4.575  
4.400  
4.388  
4.376  
4.364  
2.940  
2.914  
2.660  
2.633  
2.452  
2.413  
2.398  
2.390  
2.374  
2.348  
2.334  
2.325  
2.310  
2.255  
2.251  
2.240  
2.228  
2.217  
2.213  
2.202  
1.780  
1.774  
1.765  
1.749  
1.732  
1.687  
1.648  
1.644  
1.620  
1.616  
1.596  
1.591  
1.532  
1.511  
1.422  
1.410  
1.398  
1.363  
1.345  
1.329  
1.315  
1.303  
0.970

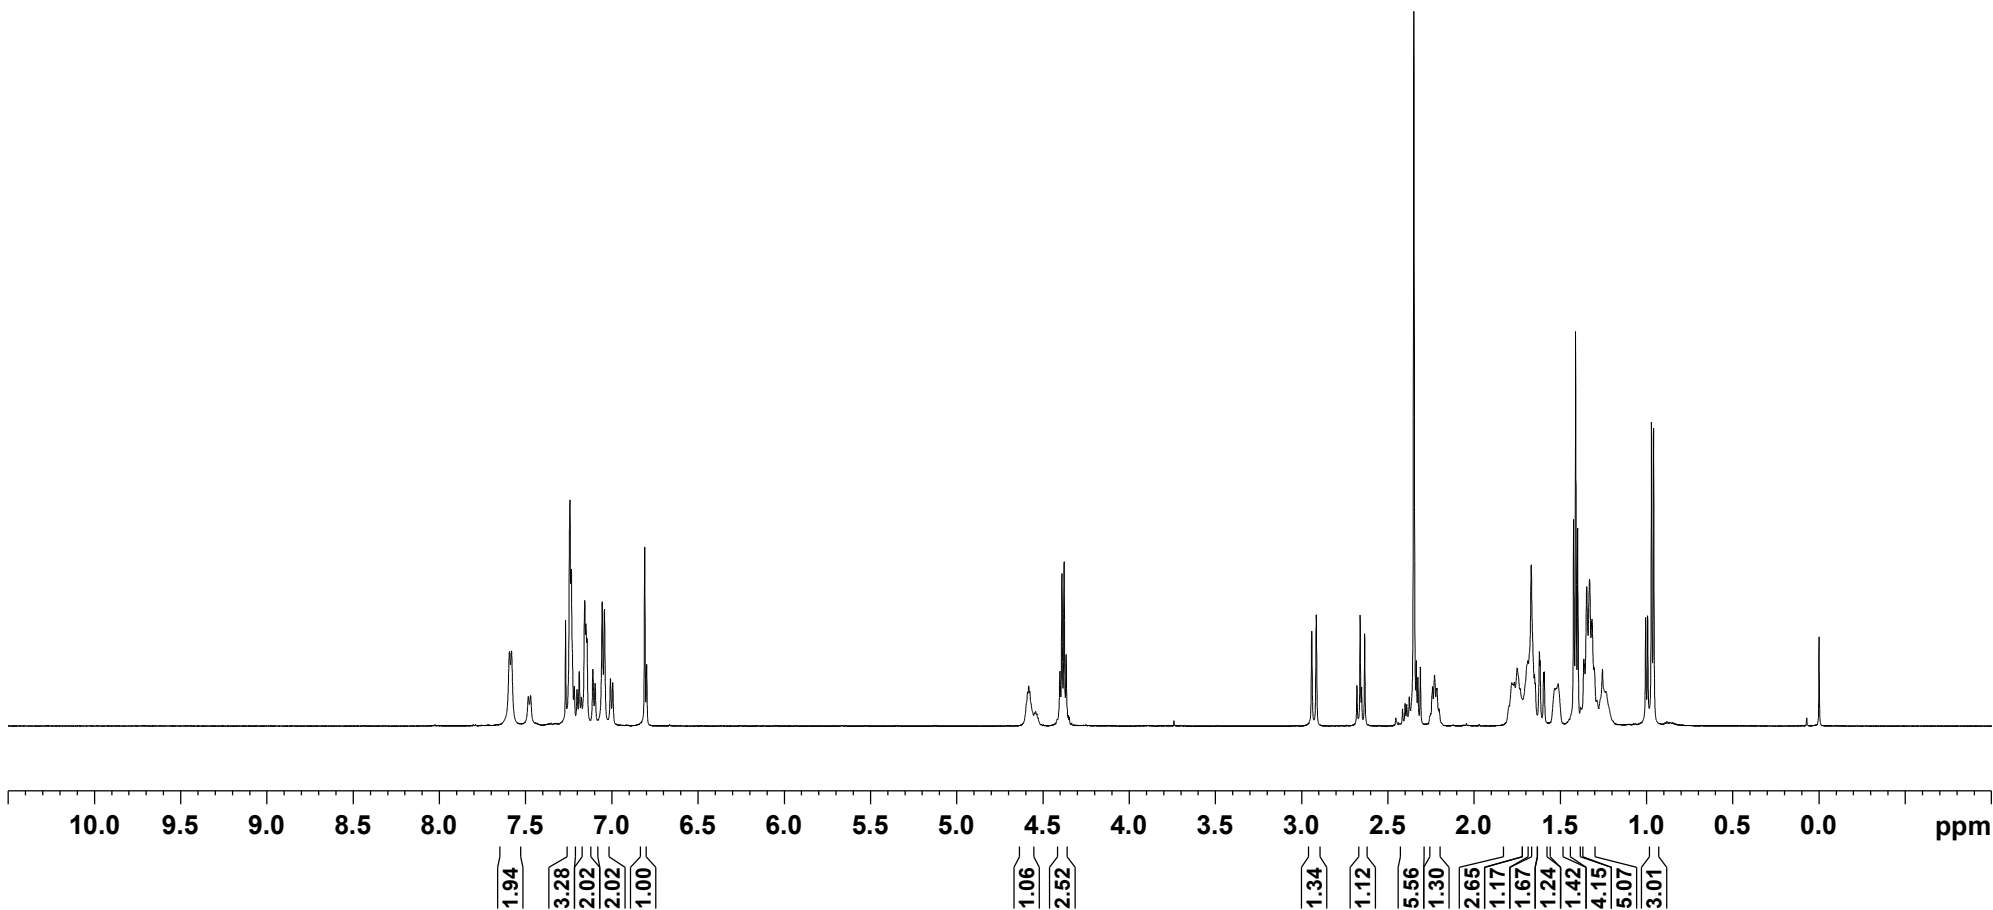

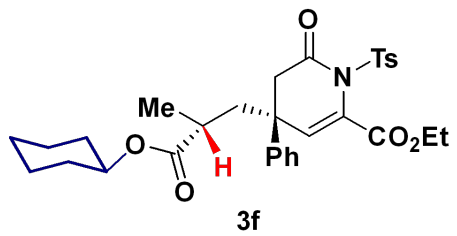

175.40  
168.71  
163.05

144.59  
141.45  
135.00  
132.60  
131.63  
129.19  
128.92  
128.88  
127.45  
126.36

77.21  
77.00  
76.79  
72.90

62.19

44.95  
44.72  
42.44

36.04  
31.32

25.27  
23.61  
21.56  
19.77

13.97

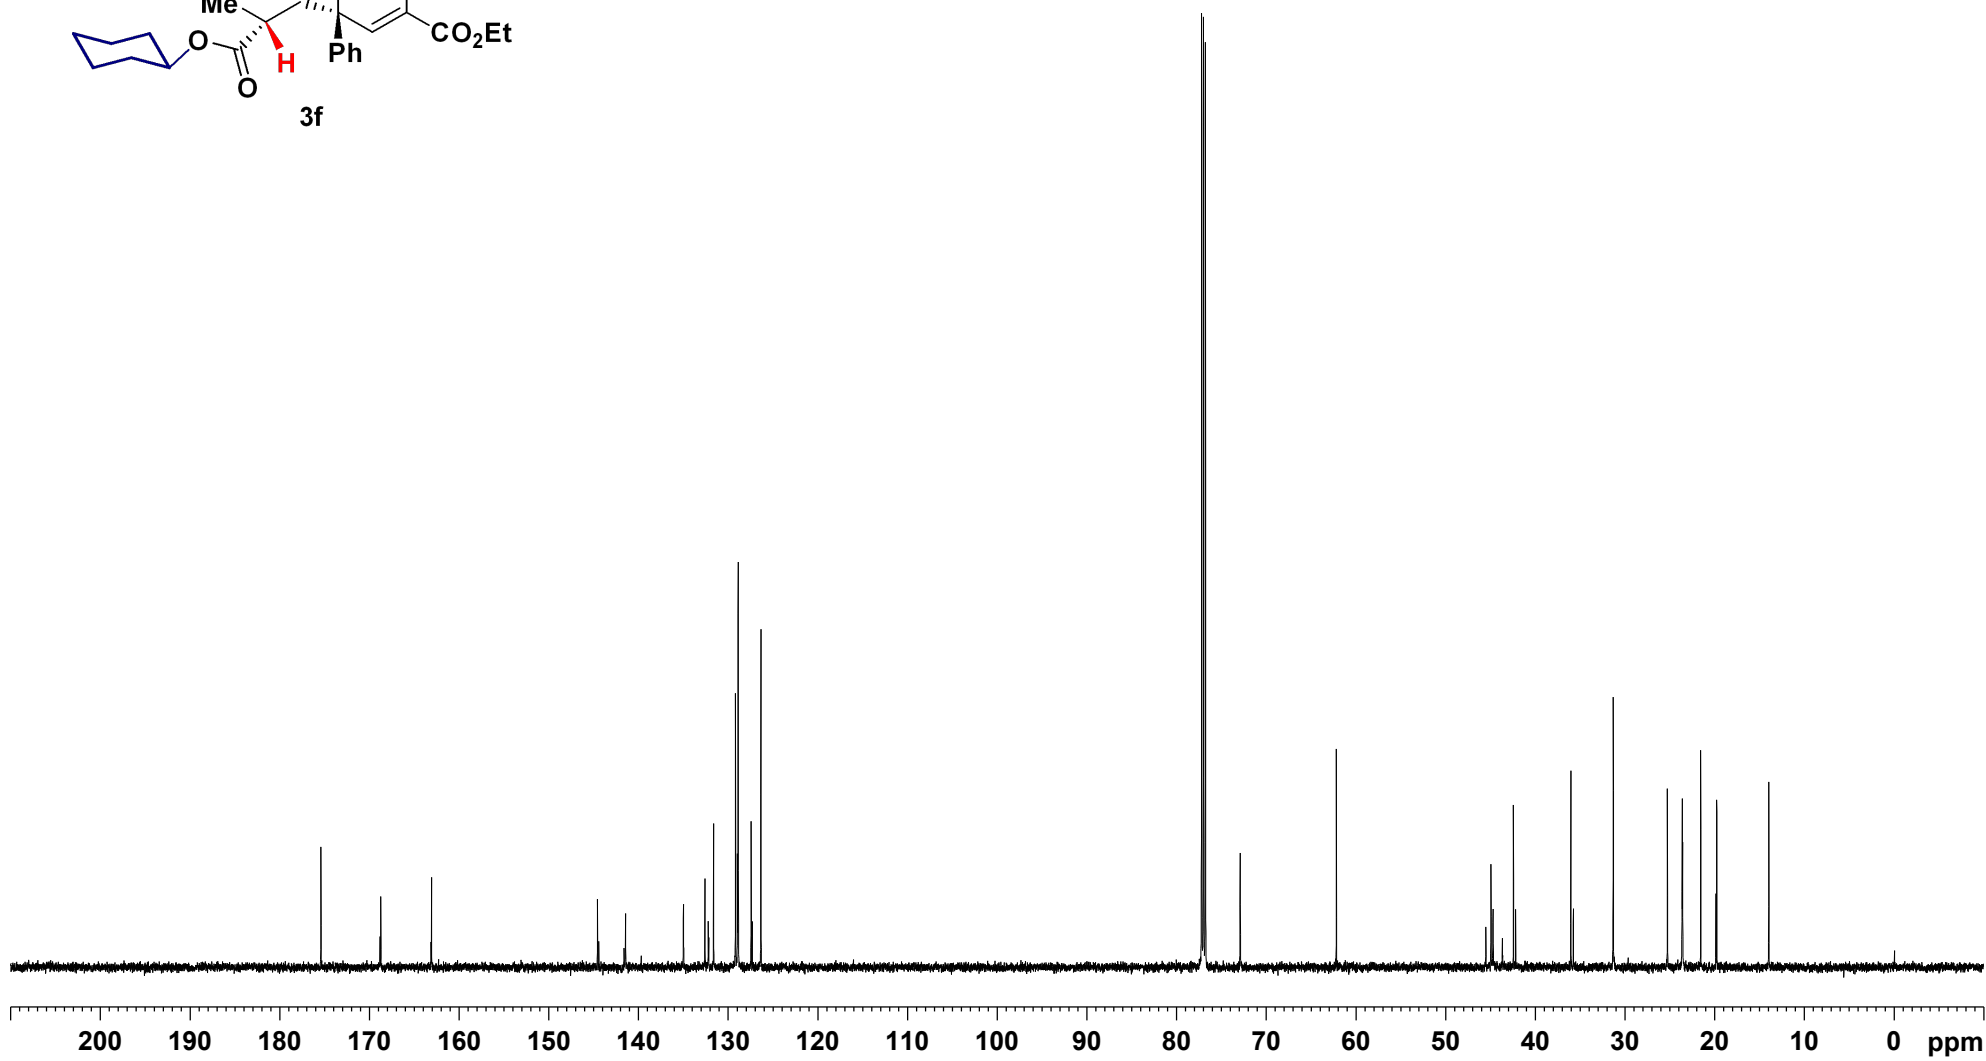



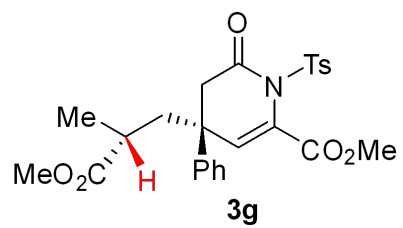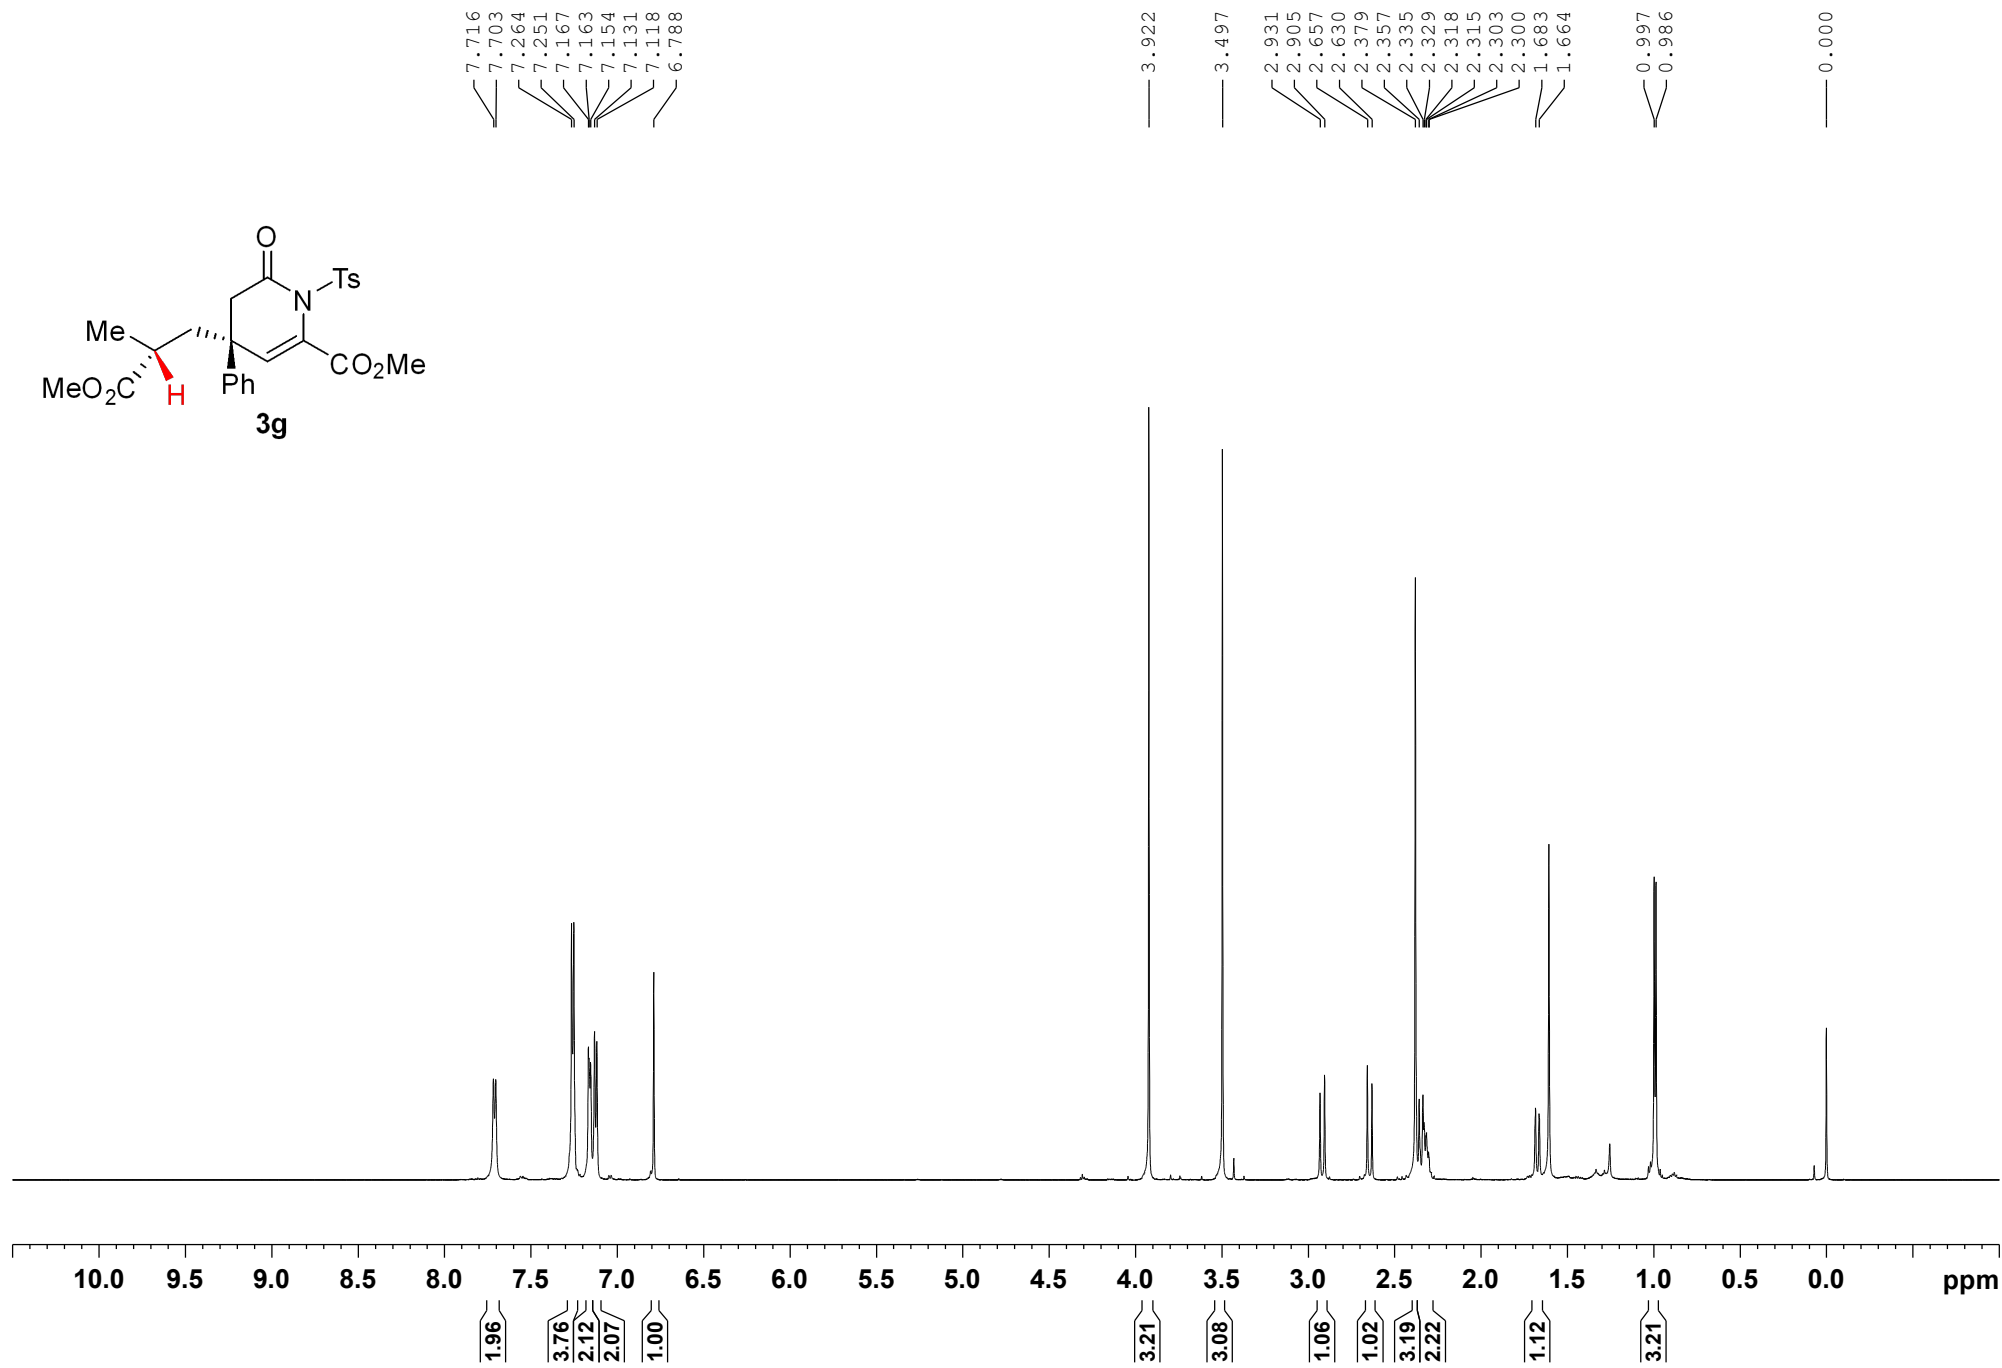

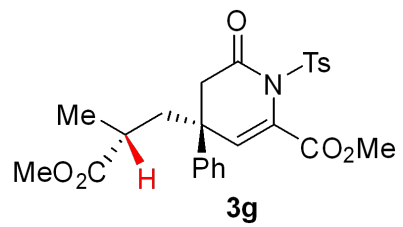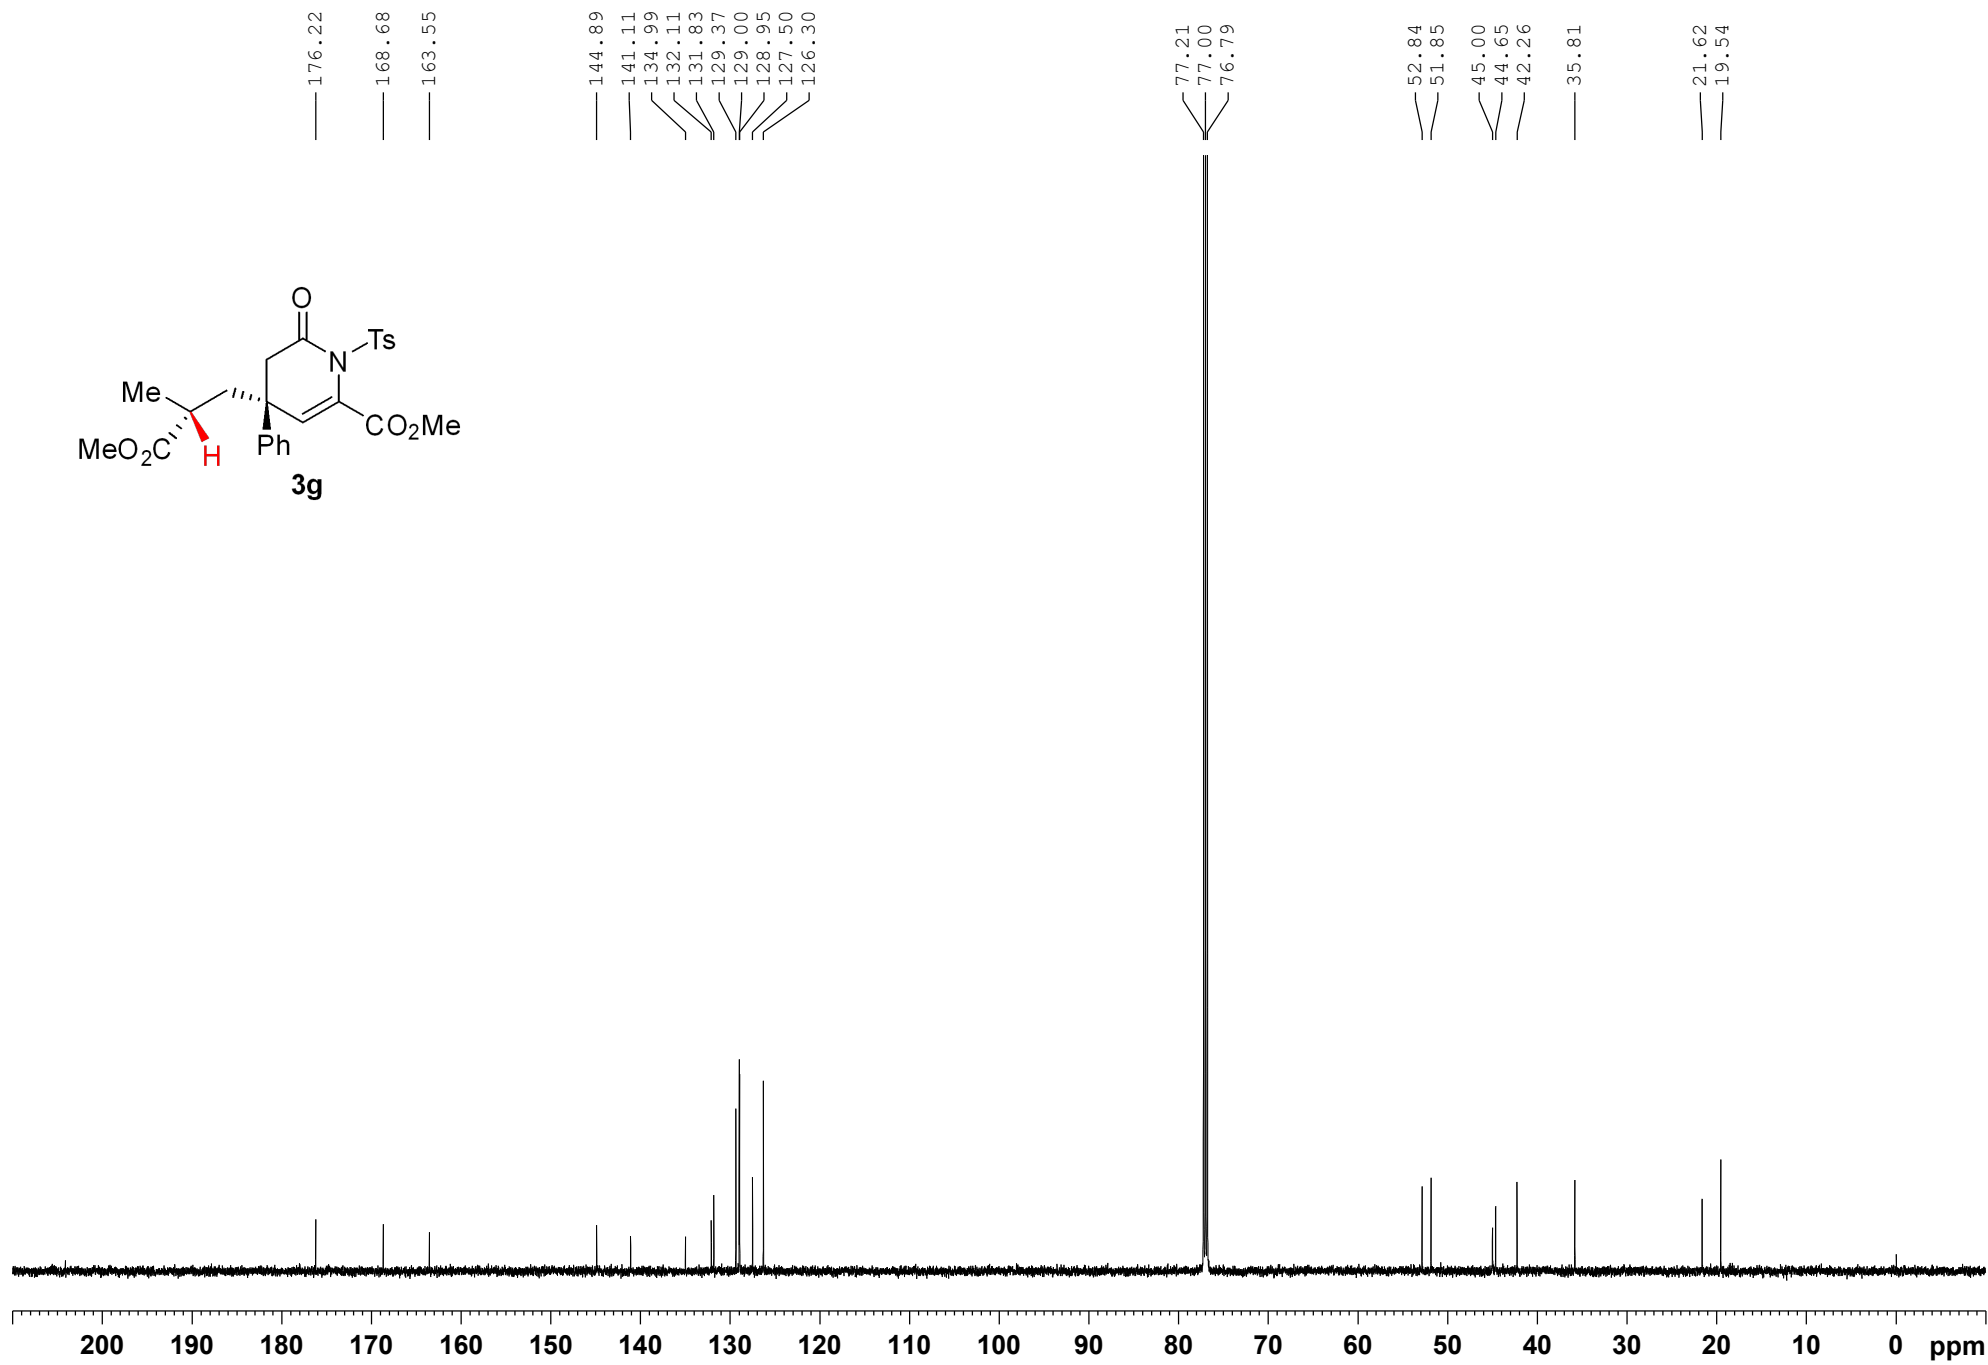

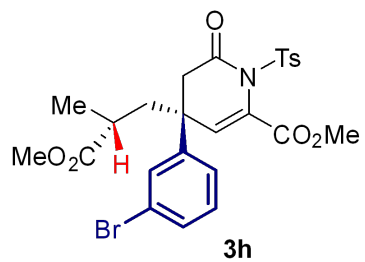

7.653  
7.633  
7.378  
7.374  
7.370  
7.361  
7.356  
7.352  
7.269  
7.194  
7.142  
7.131  
7.124  
7.121  
7.116  
7.111  
6.731

3.930

3.508

2.913  
2.874  
2.633  
2.593  
2.400  
2.341  
2.332  
2.316  
2.309  
2.303  
1.671  
1.660  
1.652

1.031  
1.015

0.000

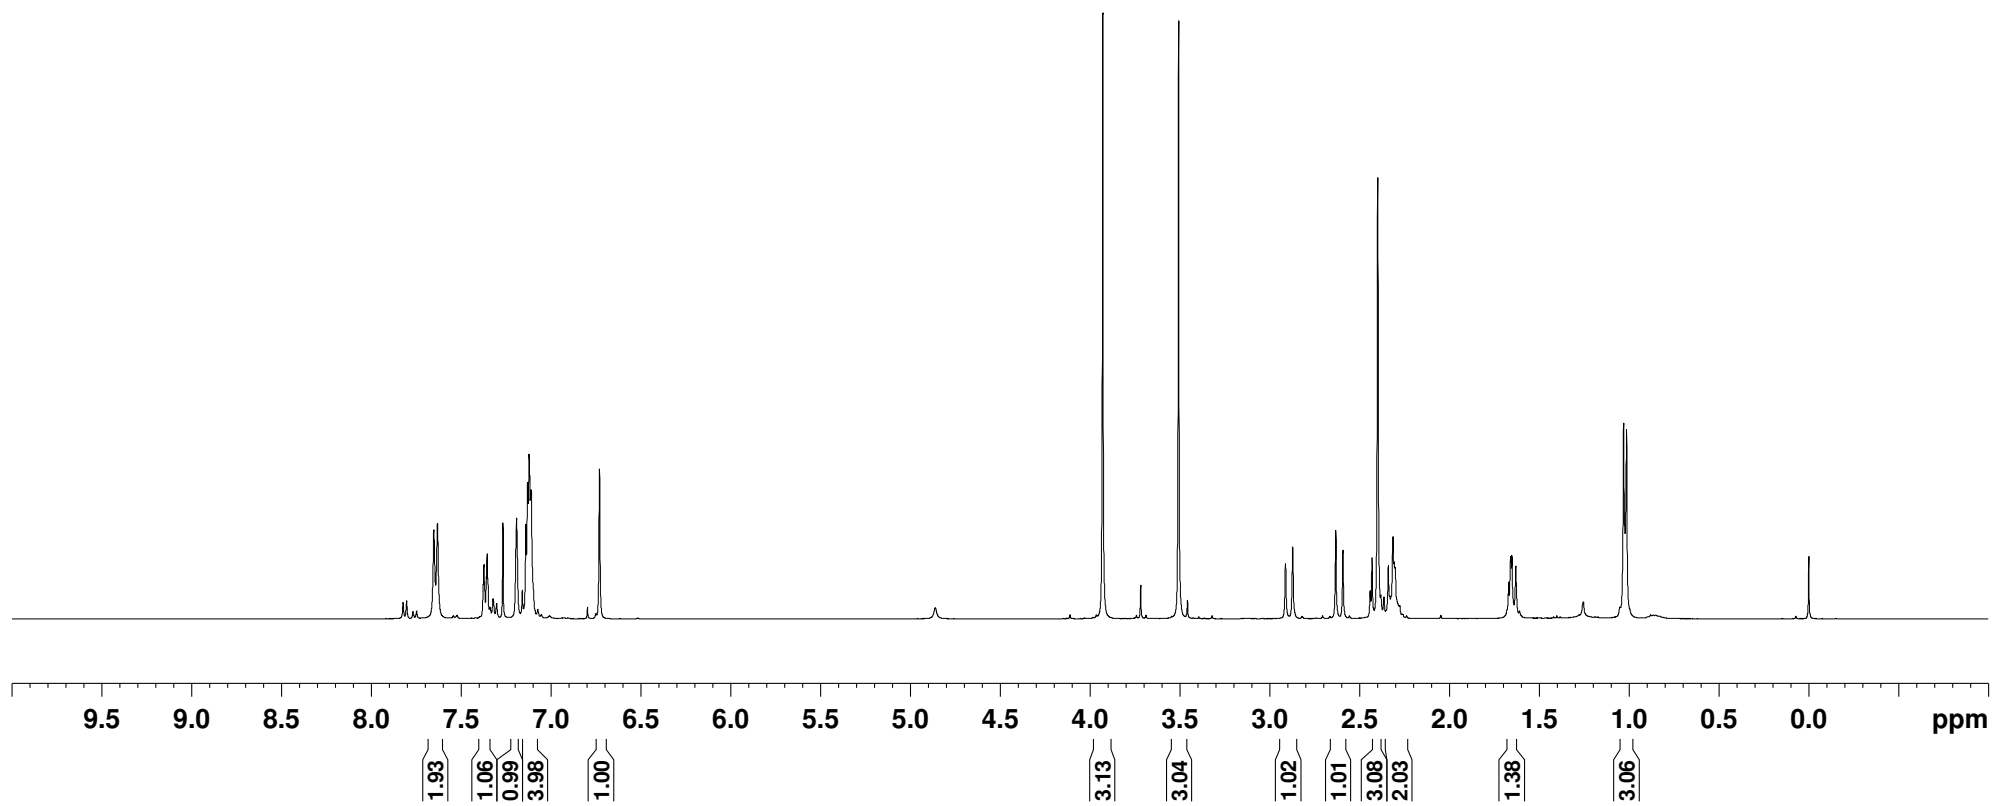

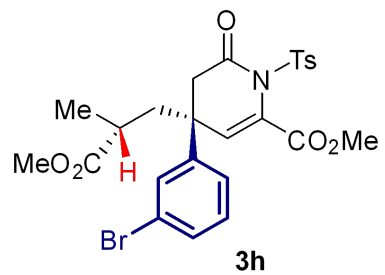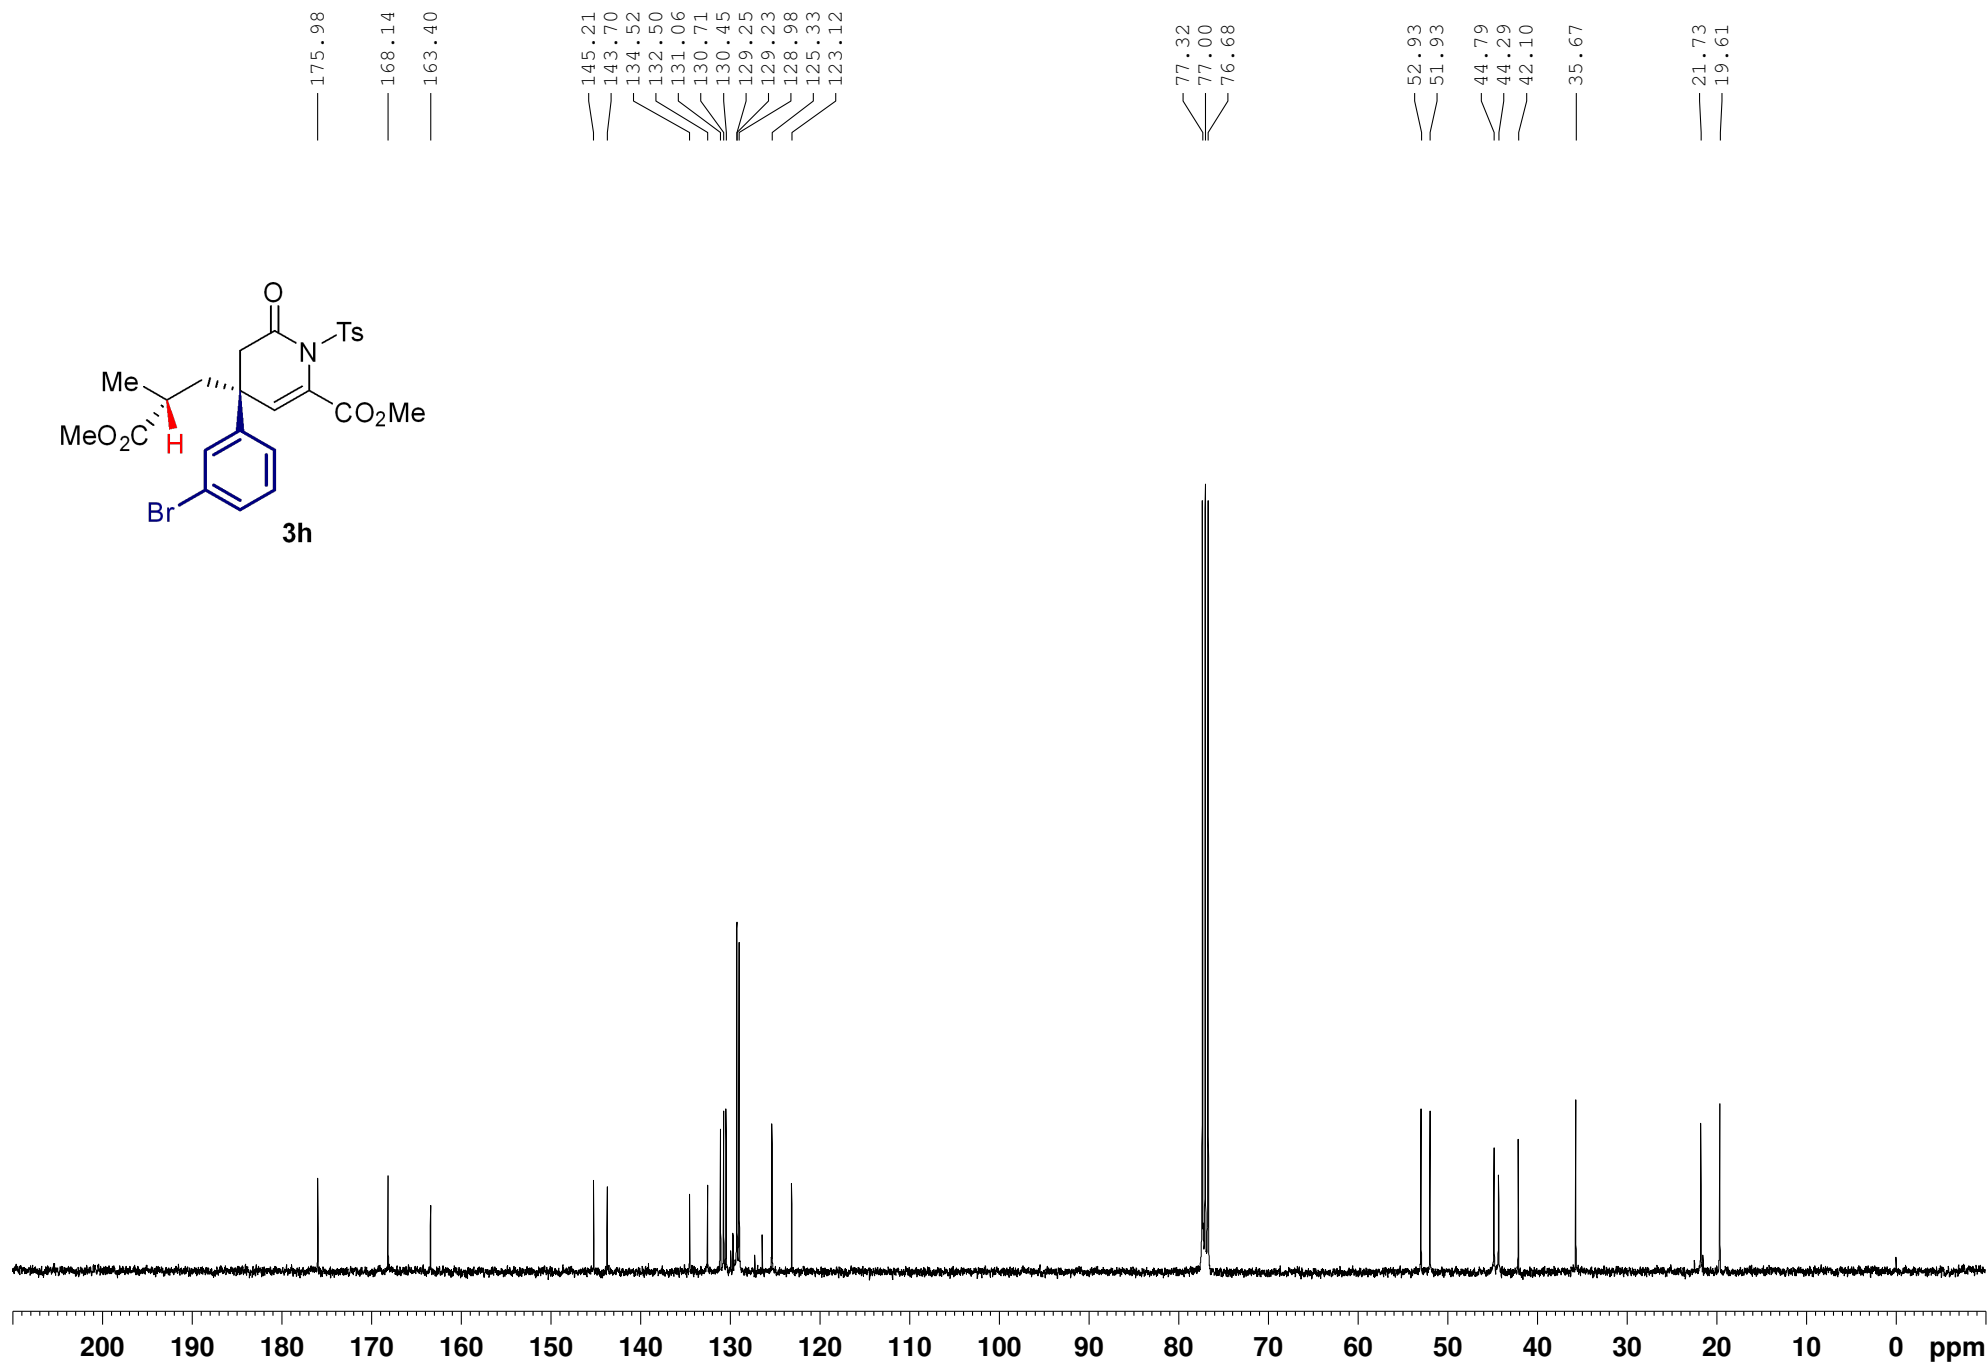

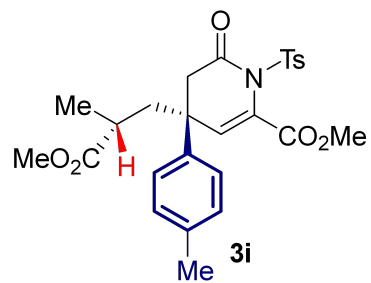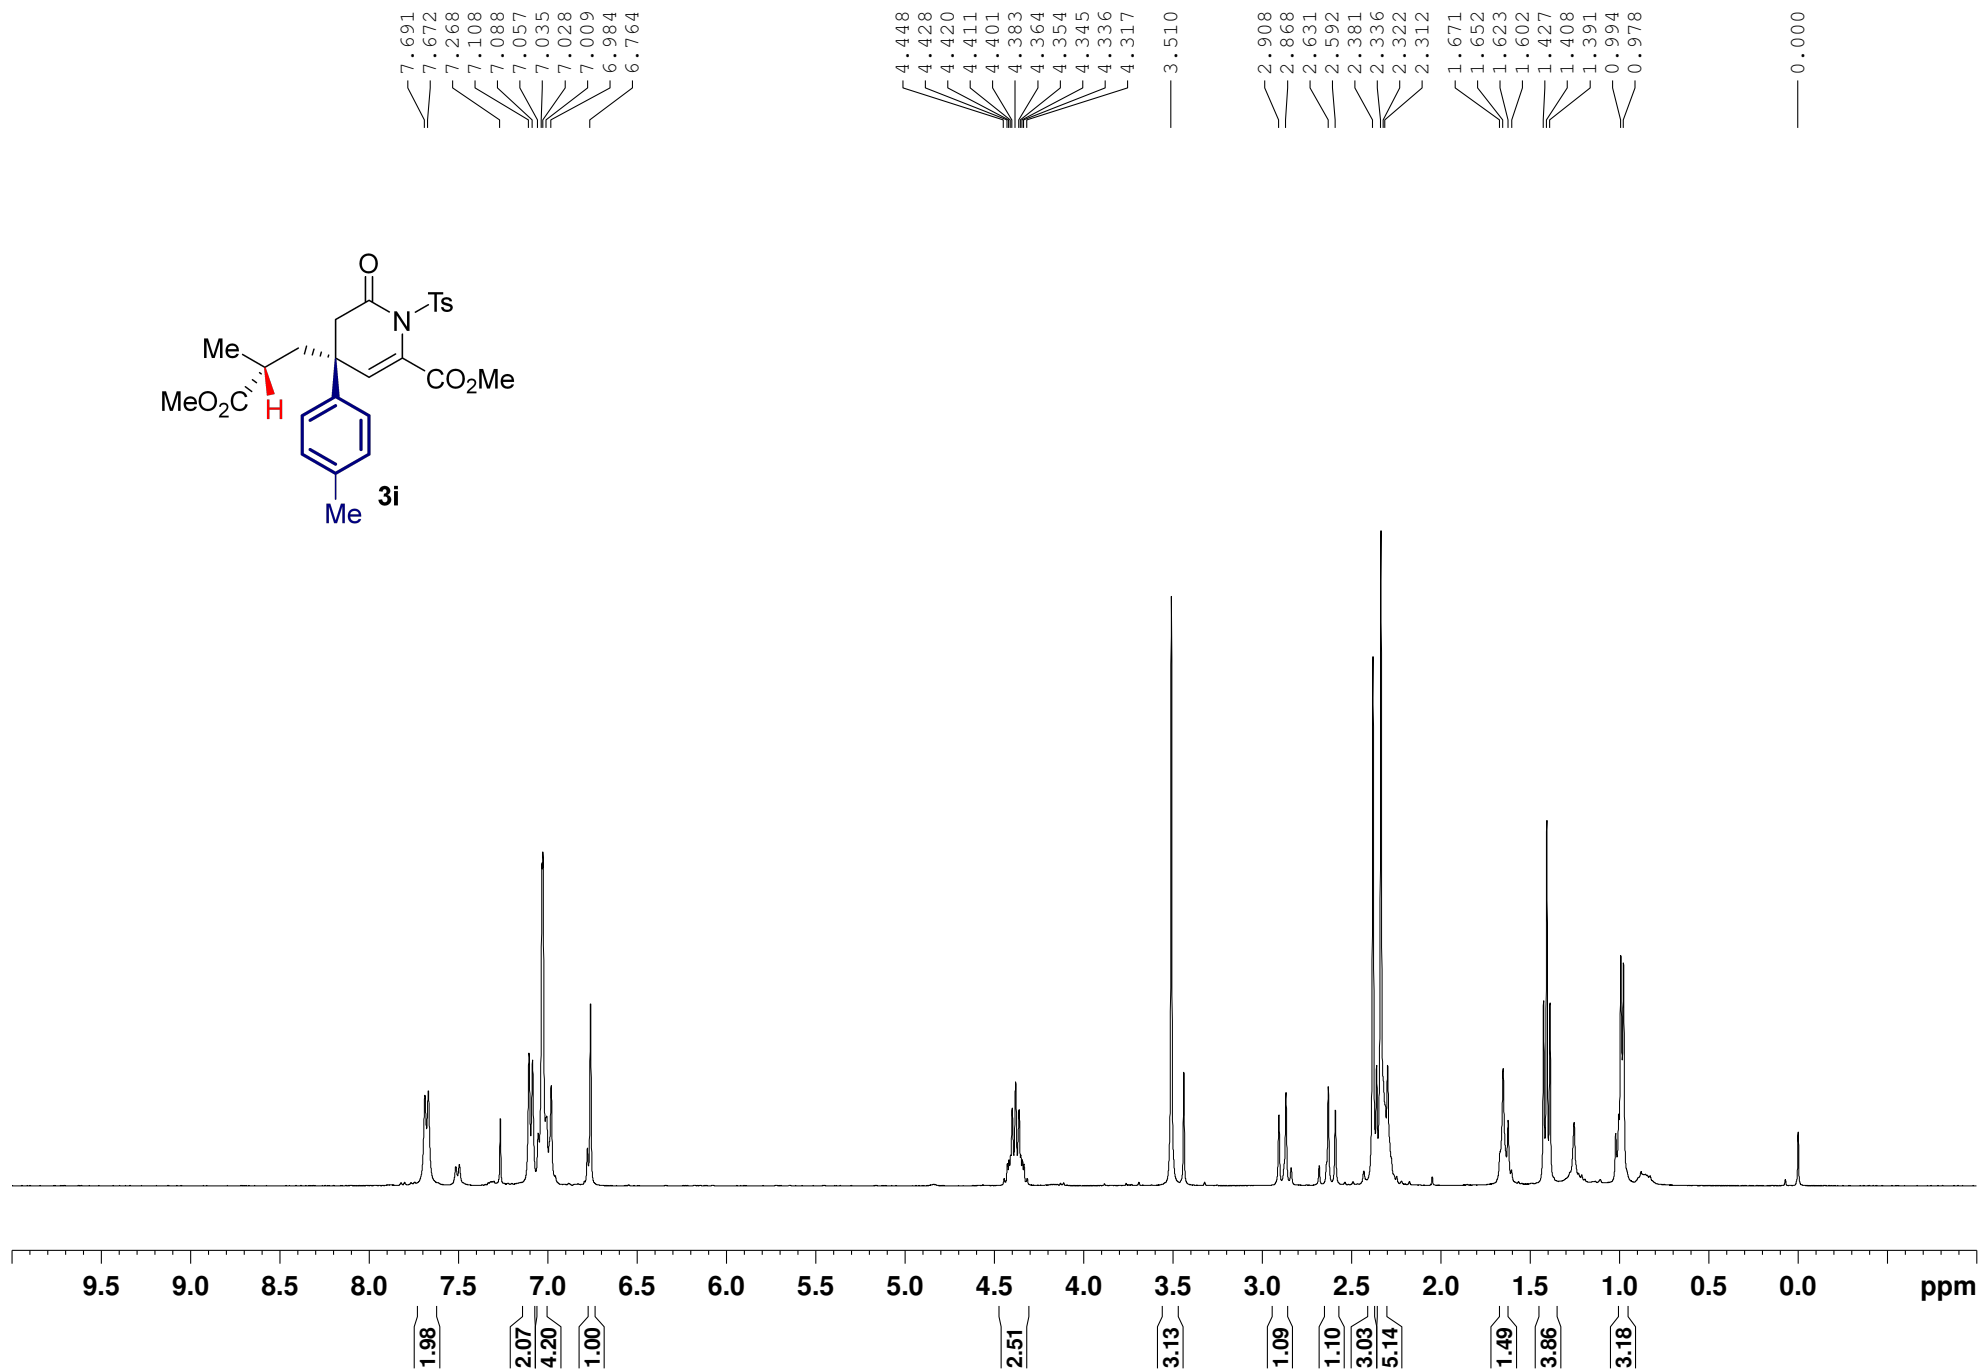

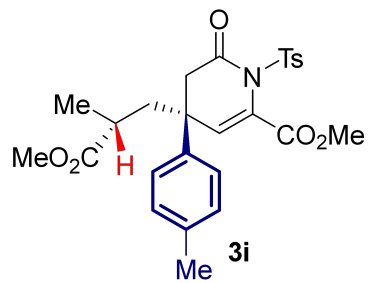

— 176.32  
— 168.82  
— 163.14

— 144.72  
— 138.04  
— 137.09  
— 134.97  
— 132.25  
— 131.71  
— 129.54  
— 129.39  
— 128.80  
— 126.15

77.33  
77.01  
76.68

— 62.21

— 51.86

44.97  
44.77  
41.86

— 35.74

21.64  
21.03  
19.50  
— 13.96

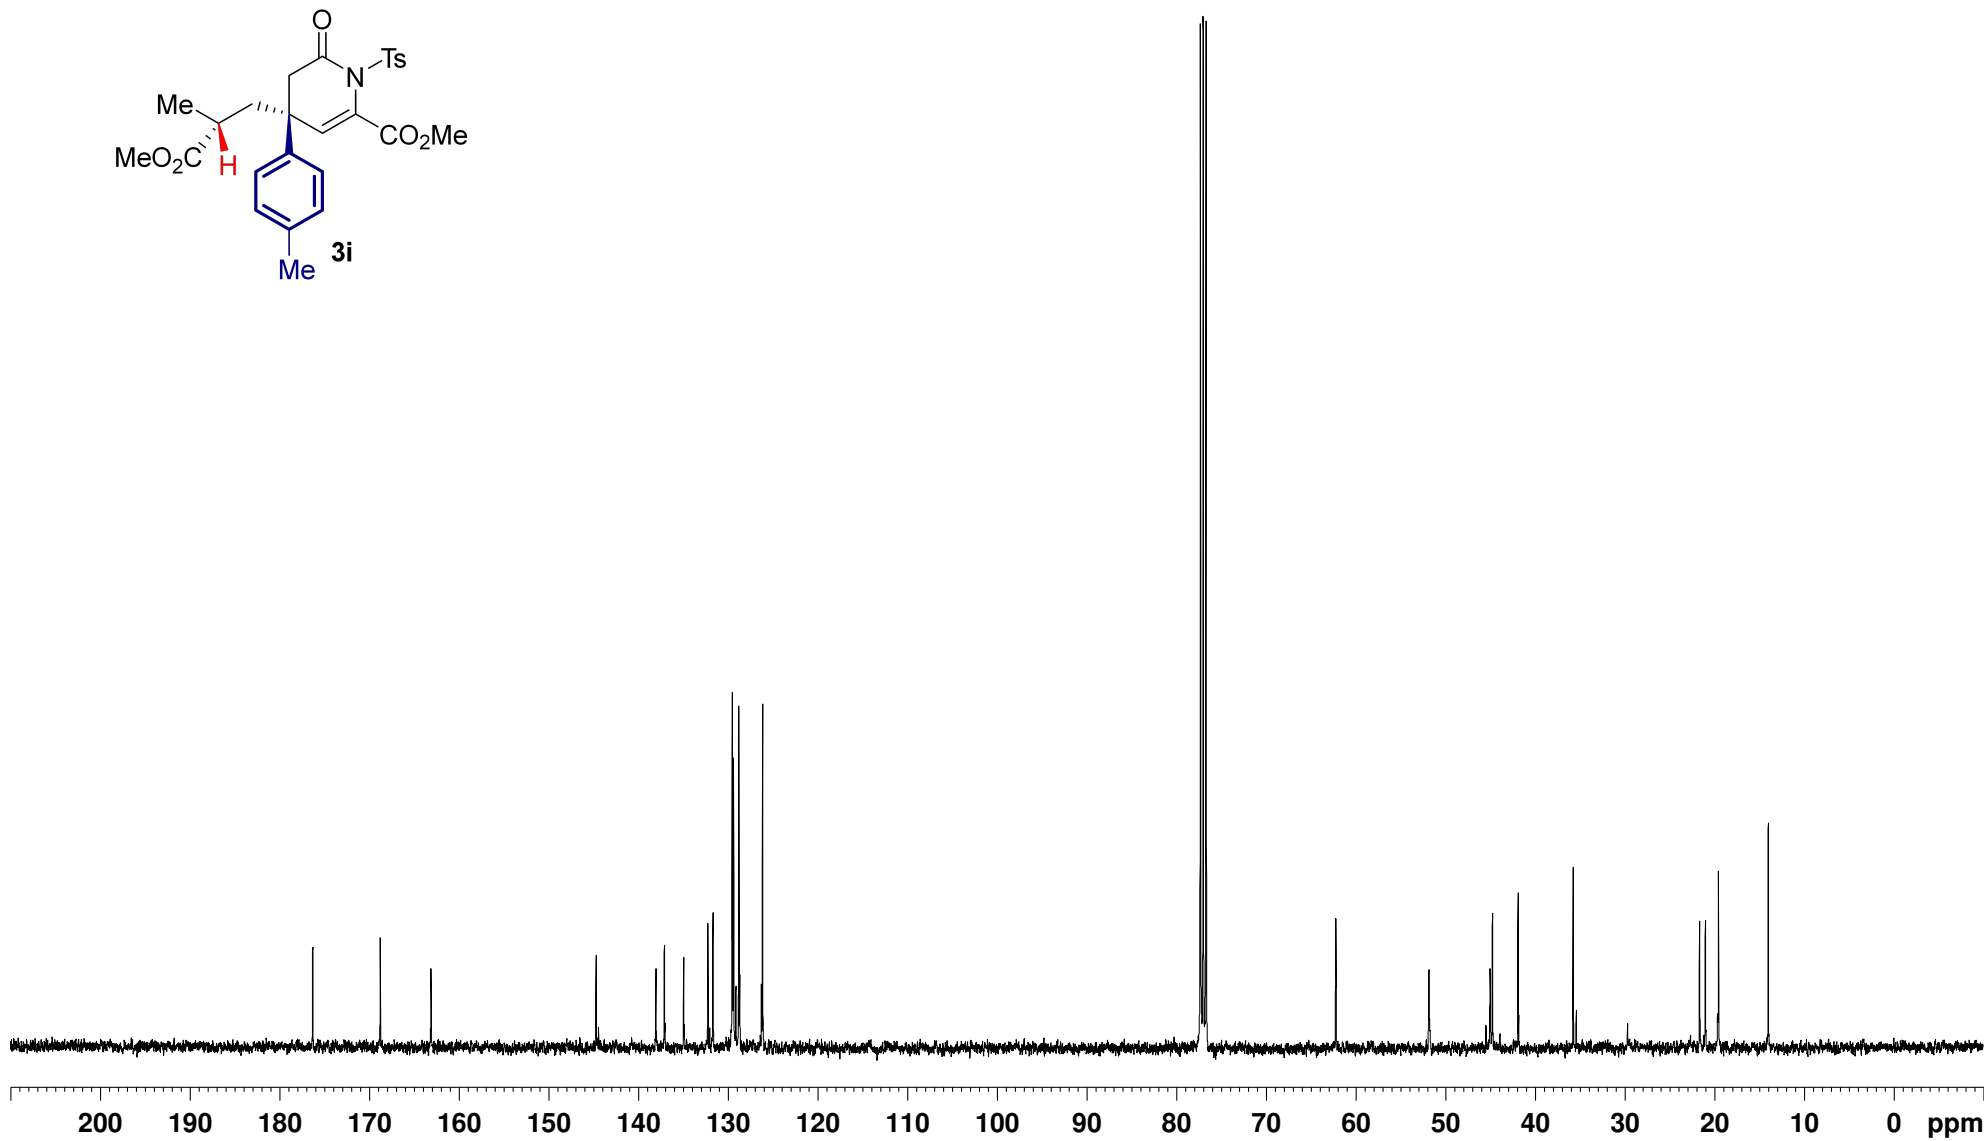

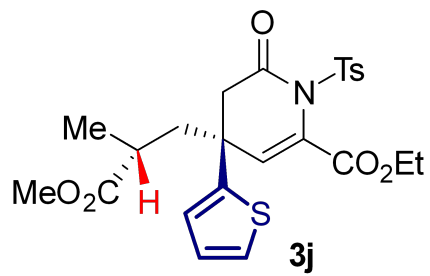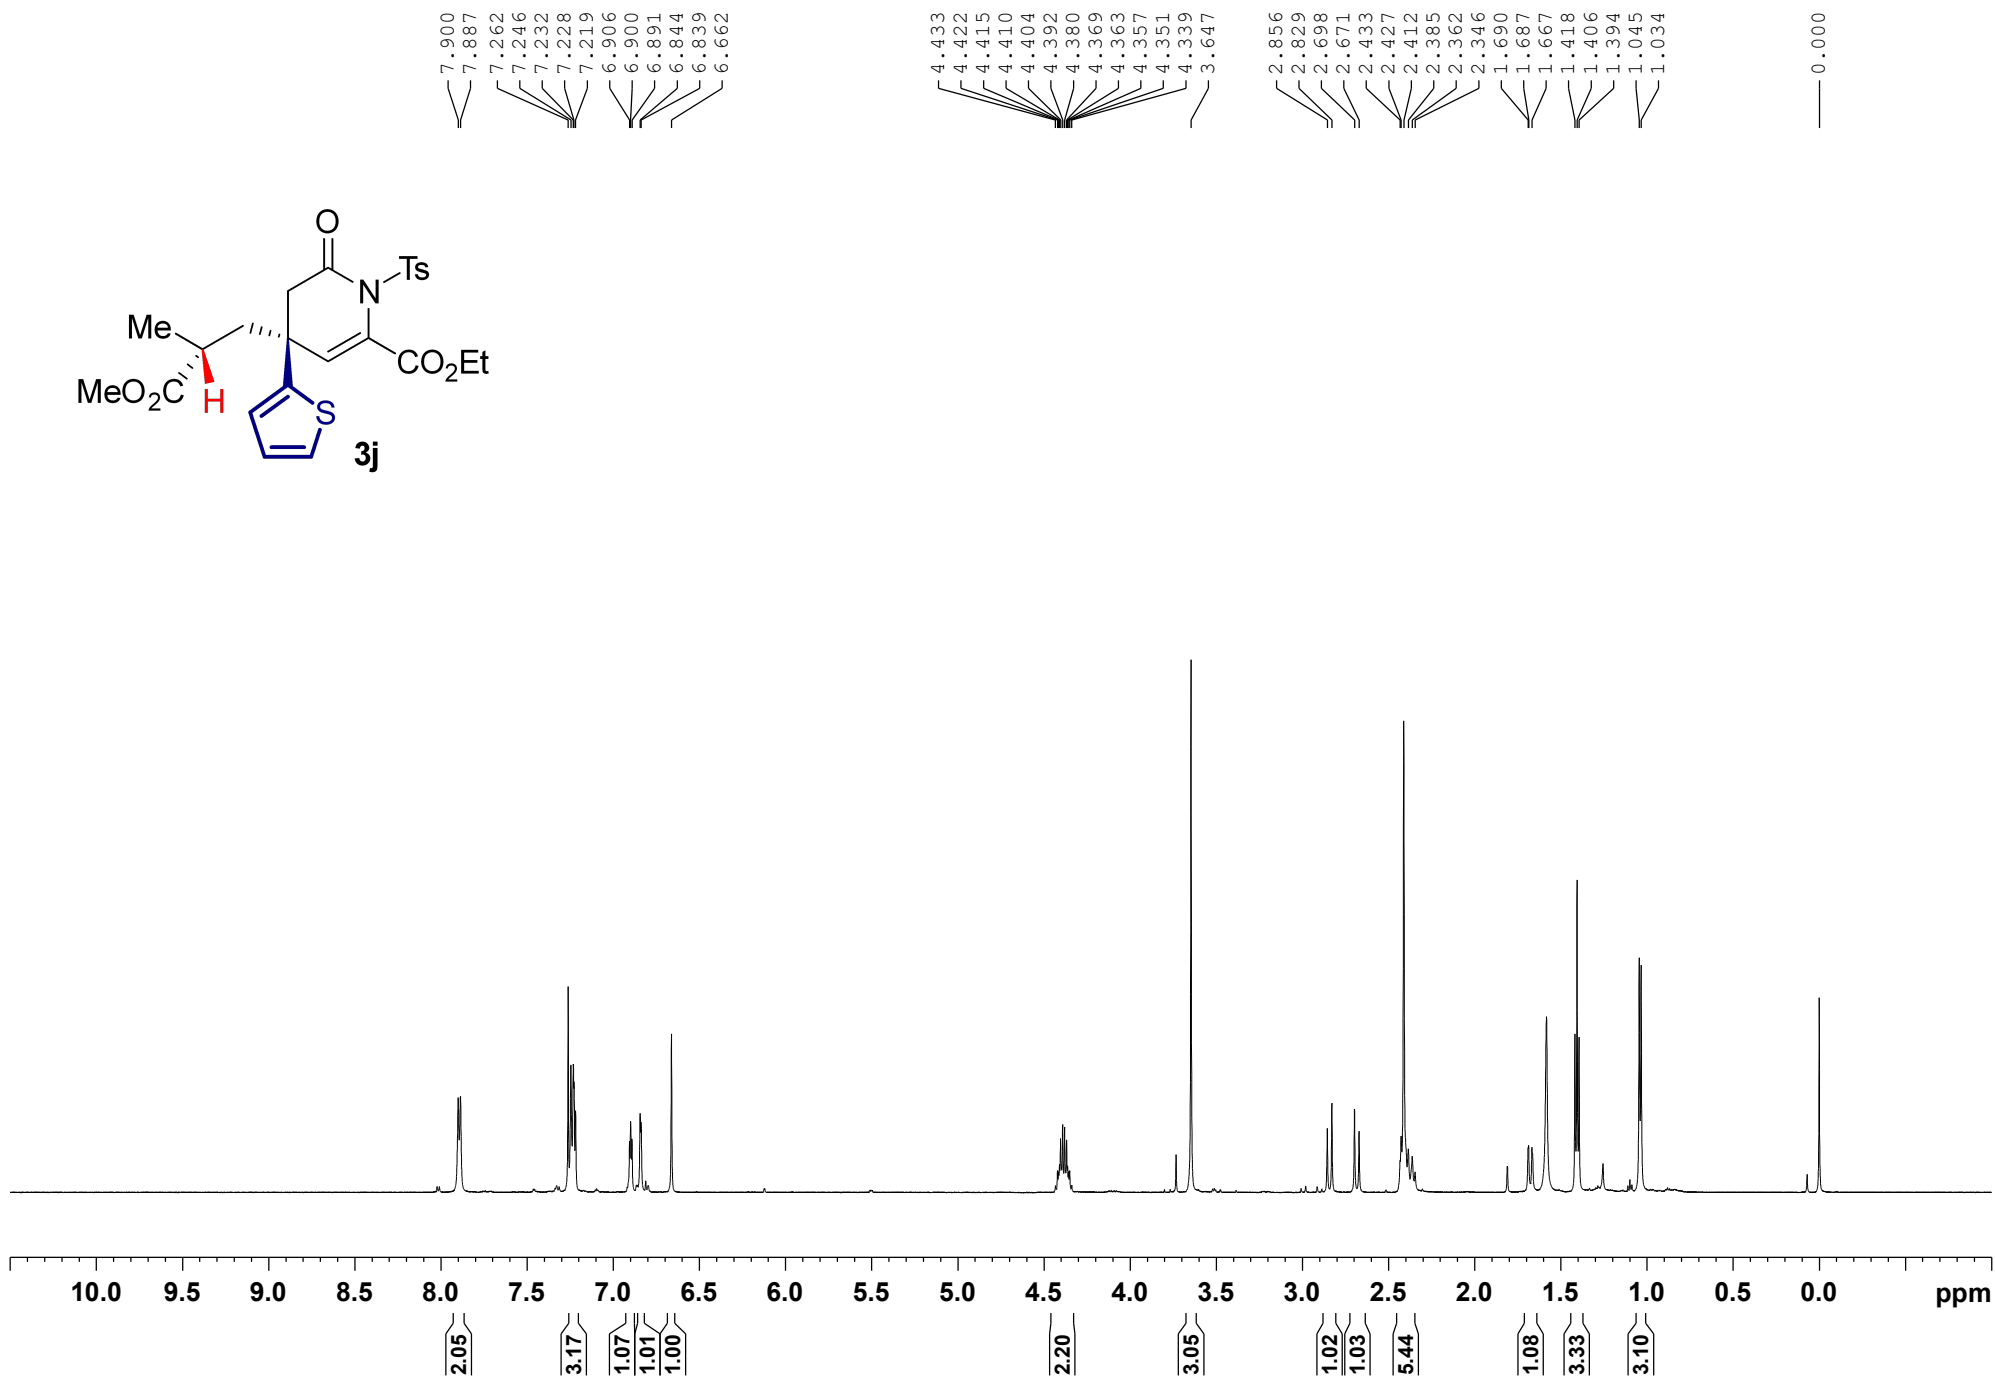

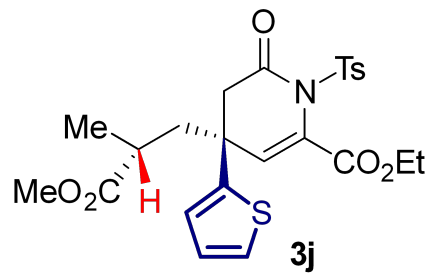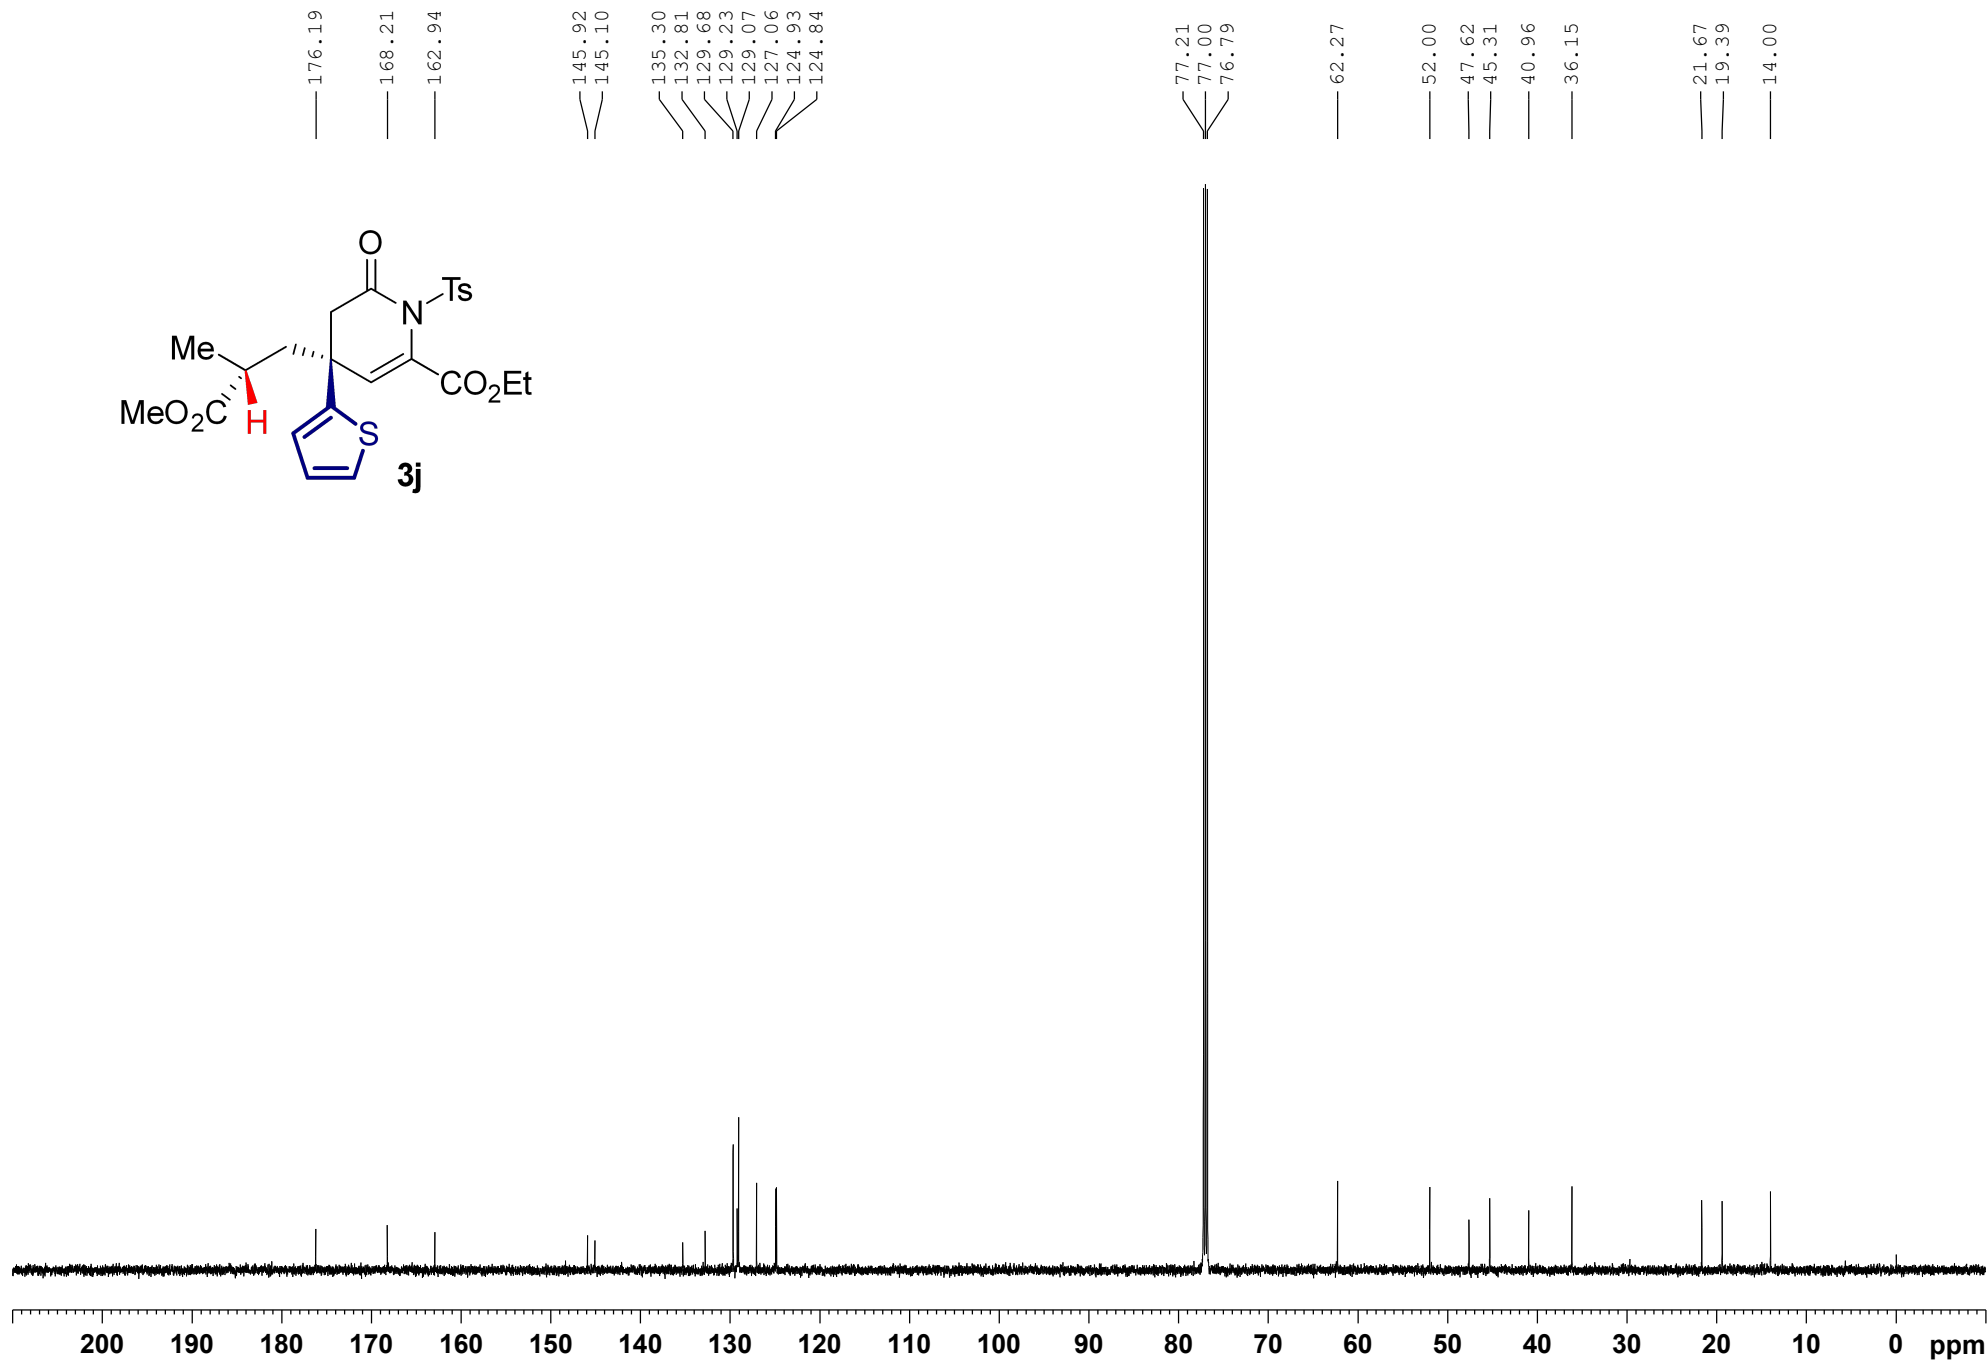



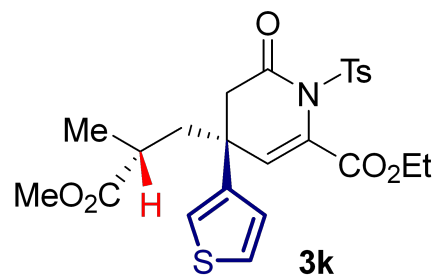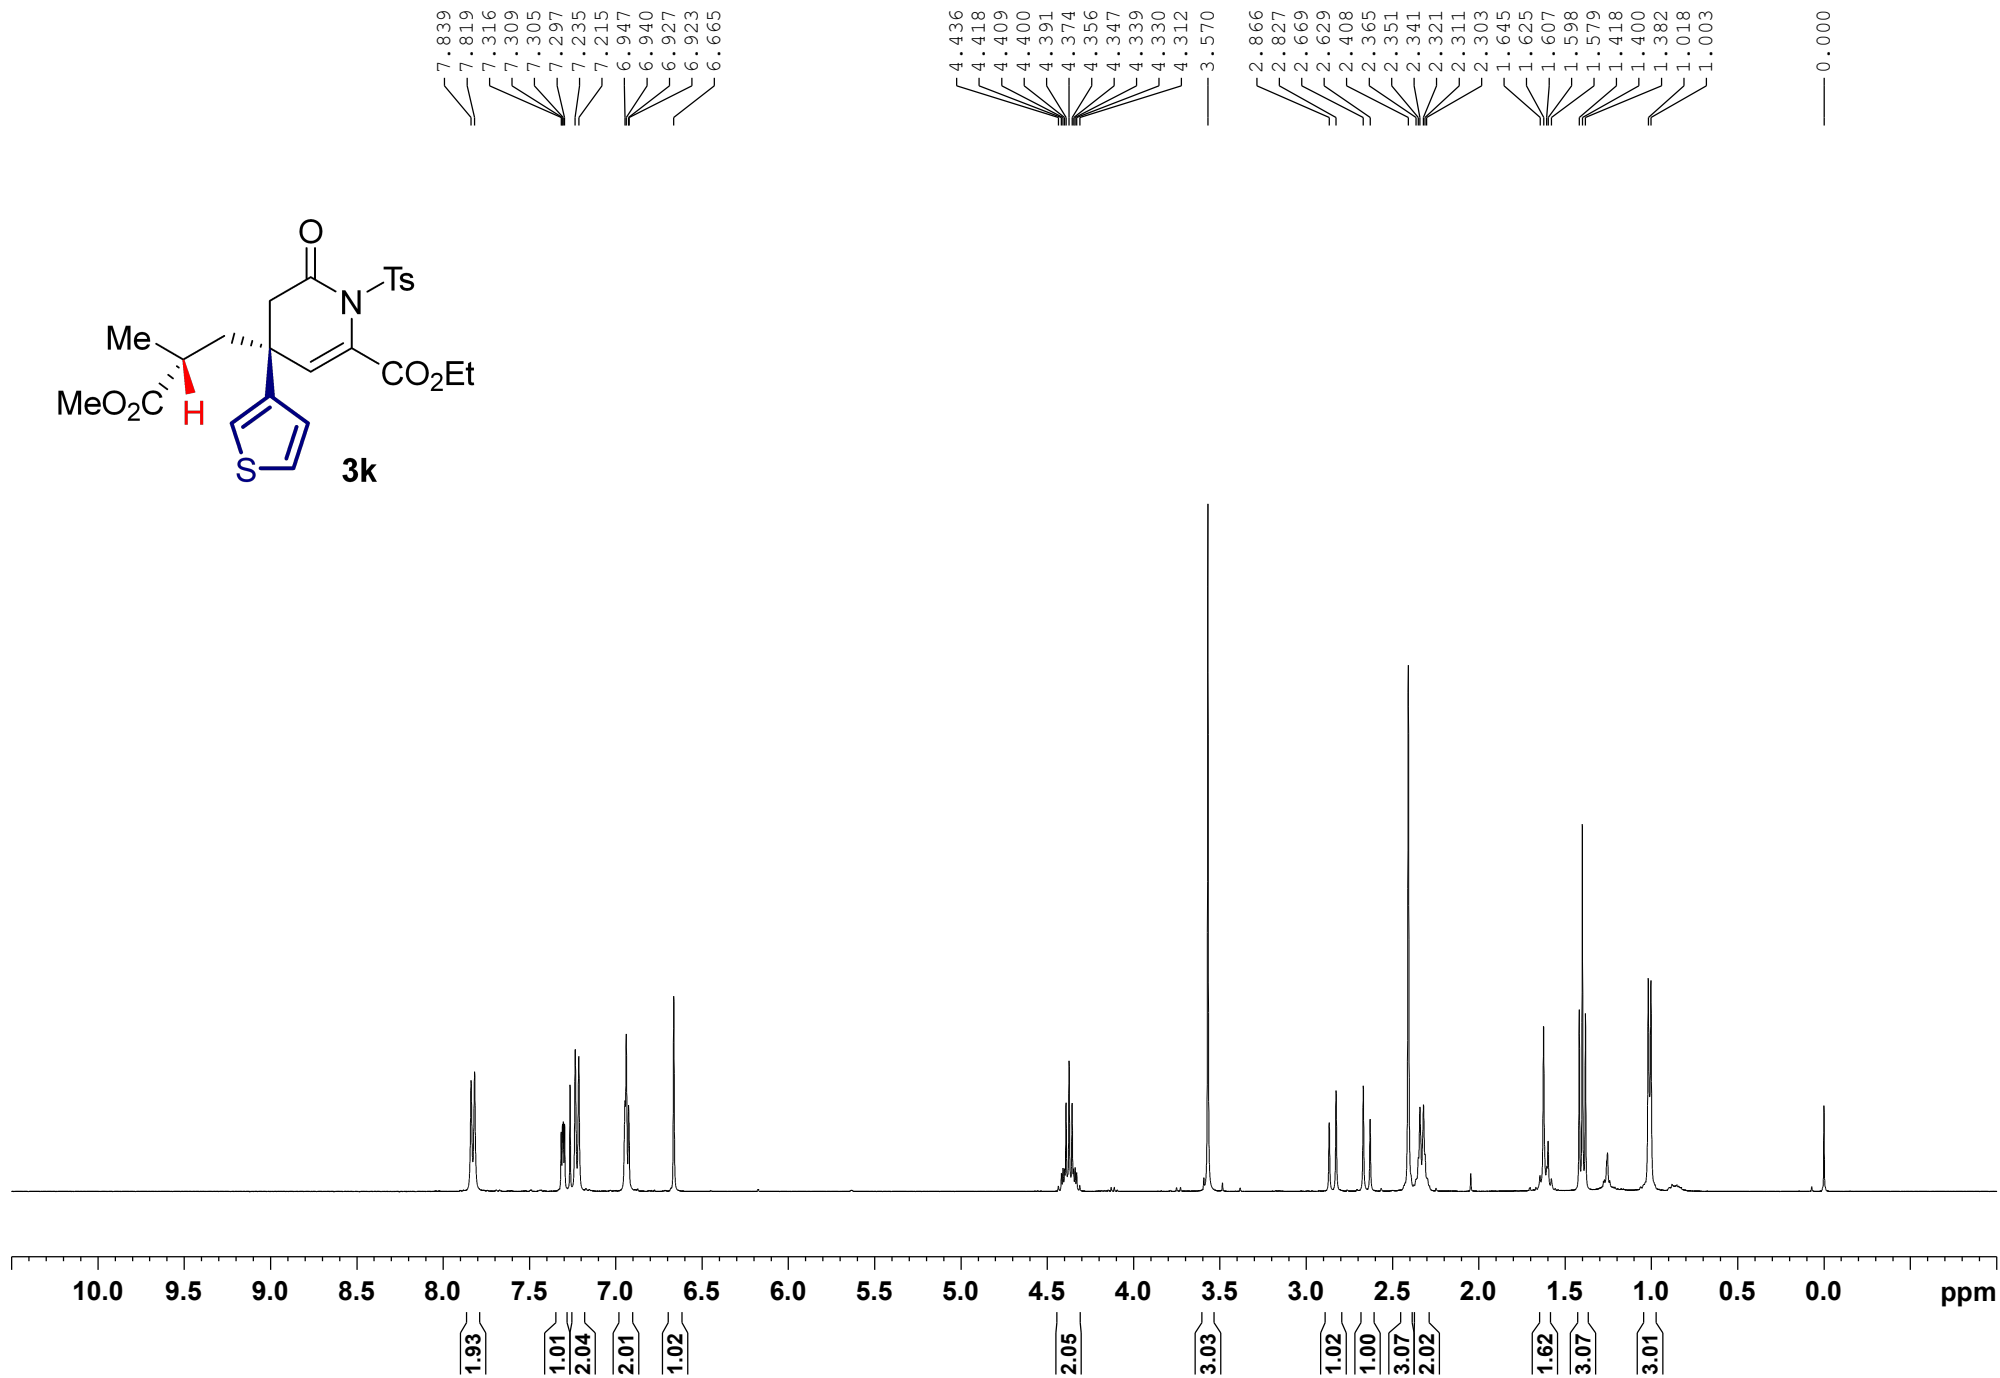

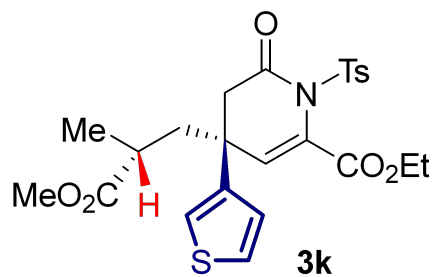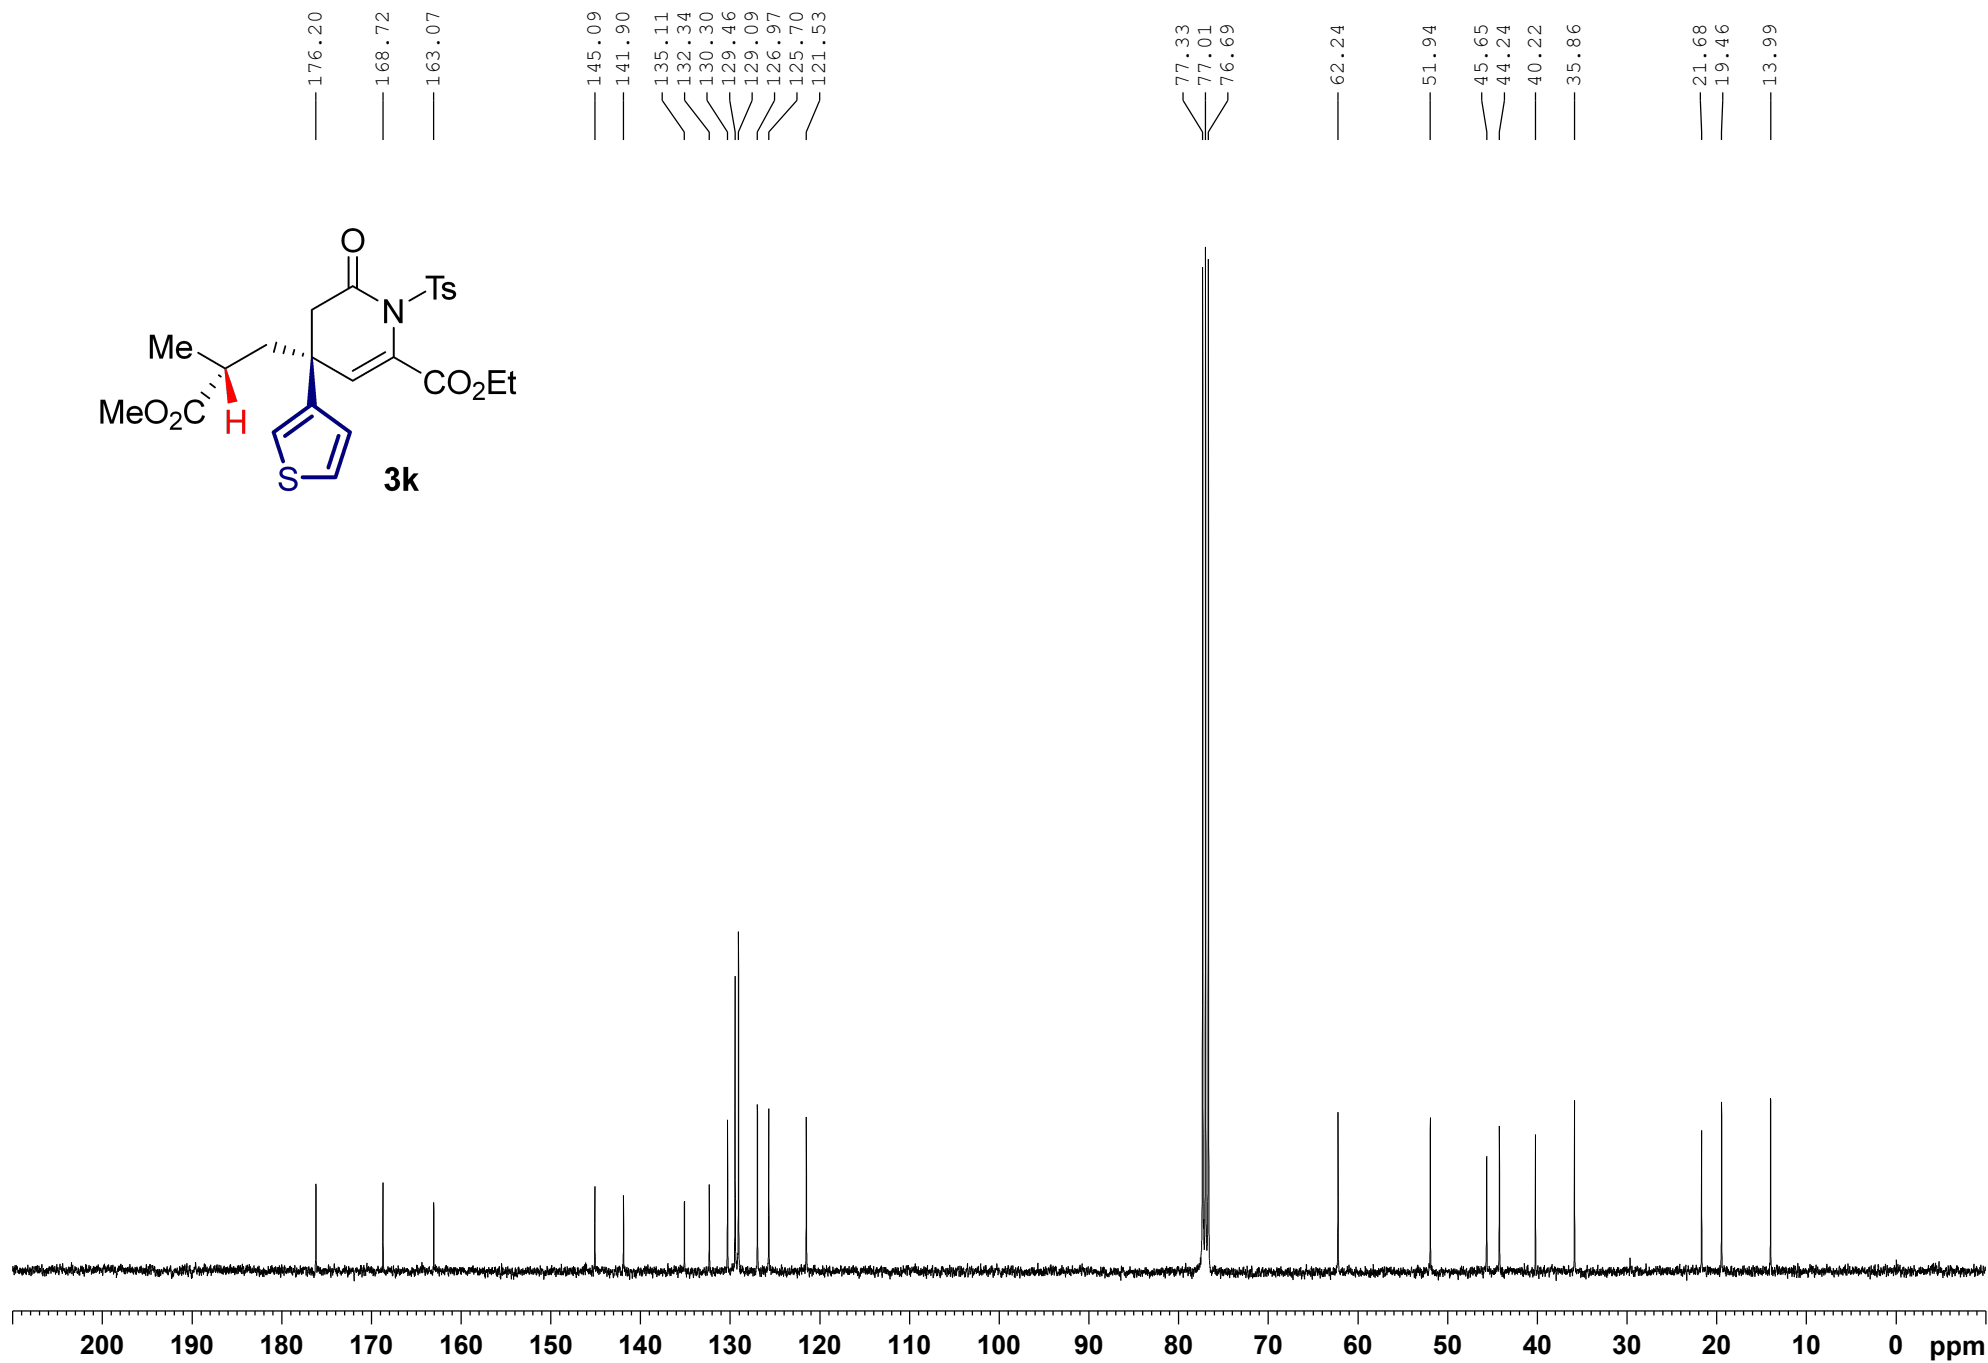

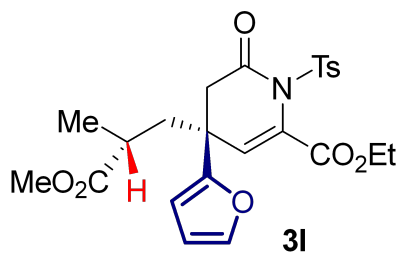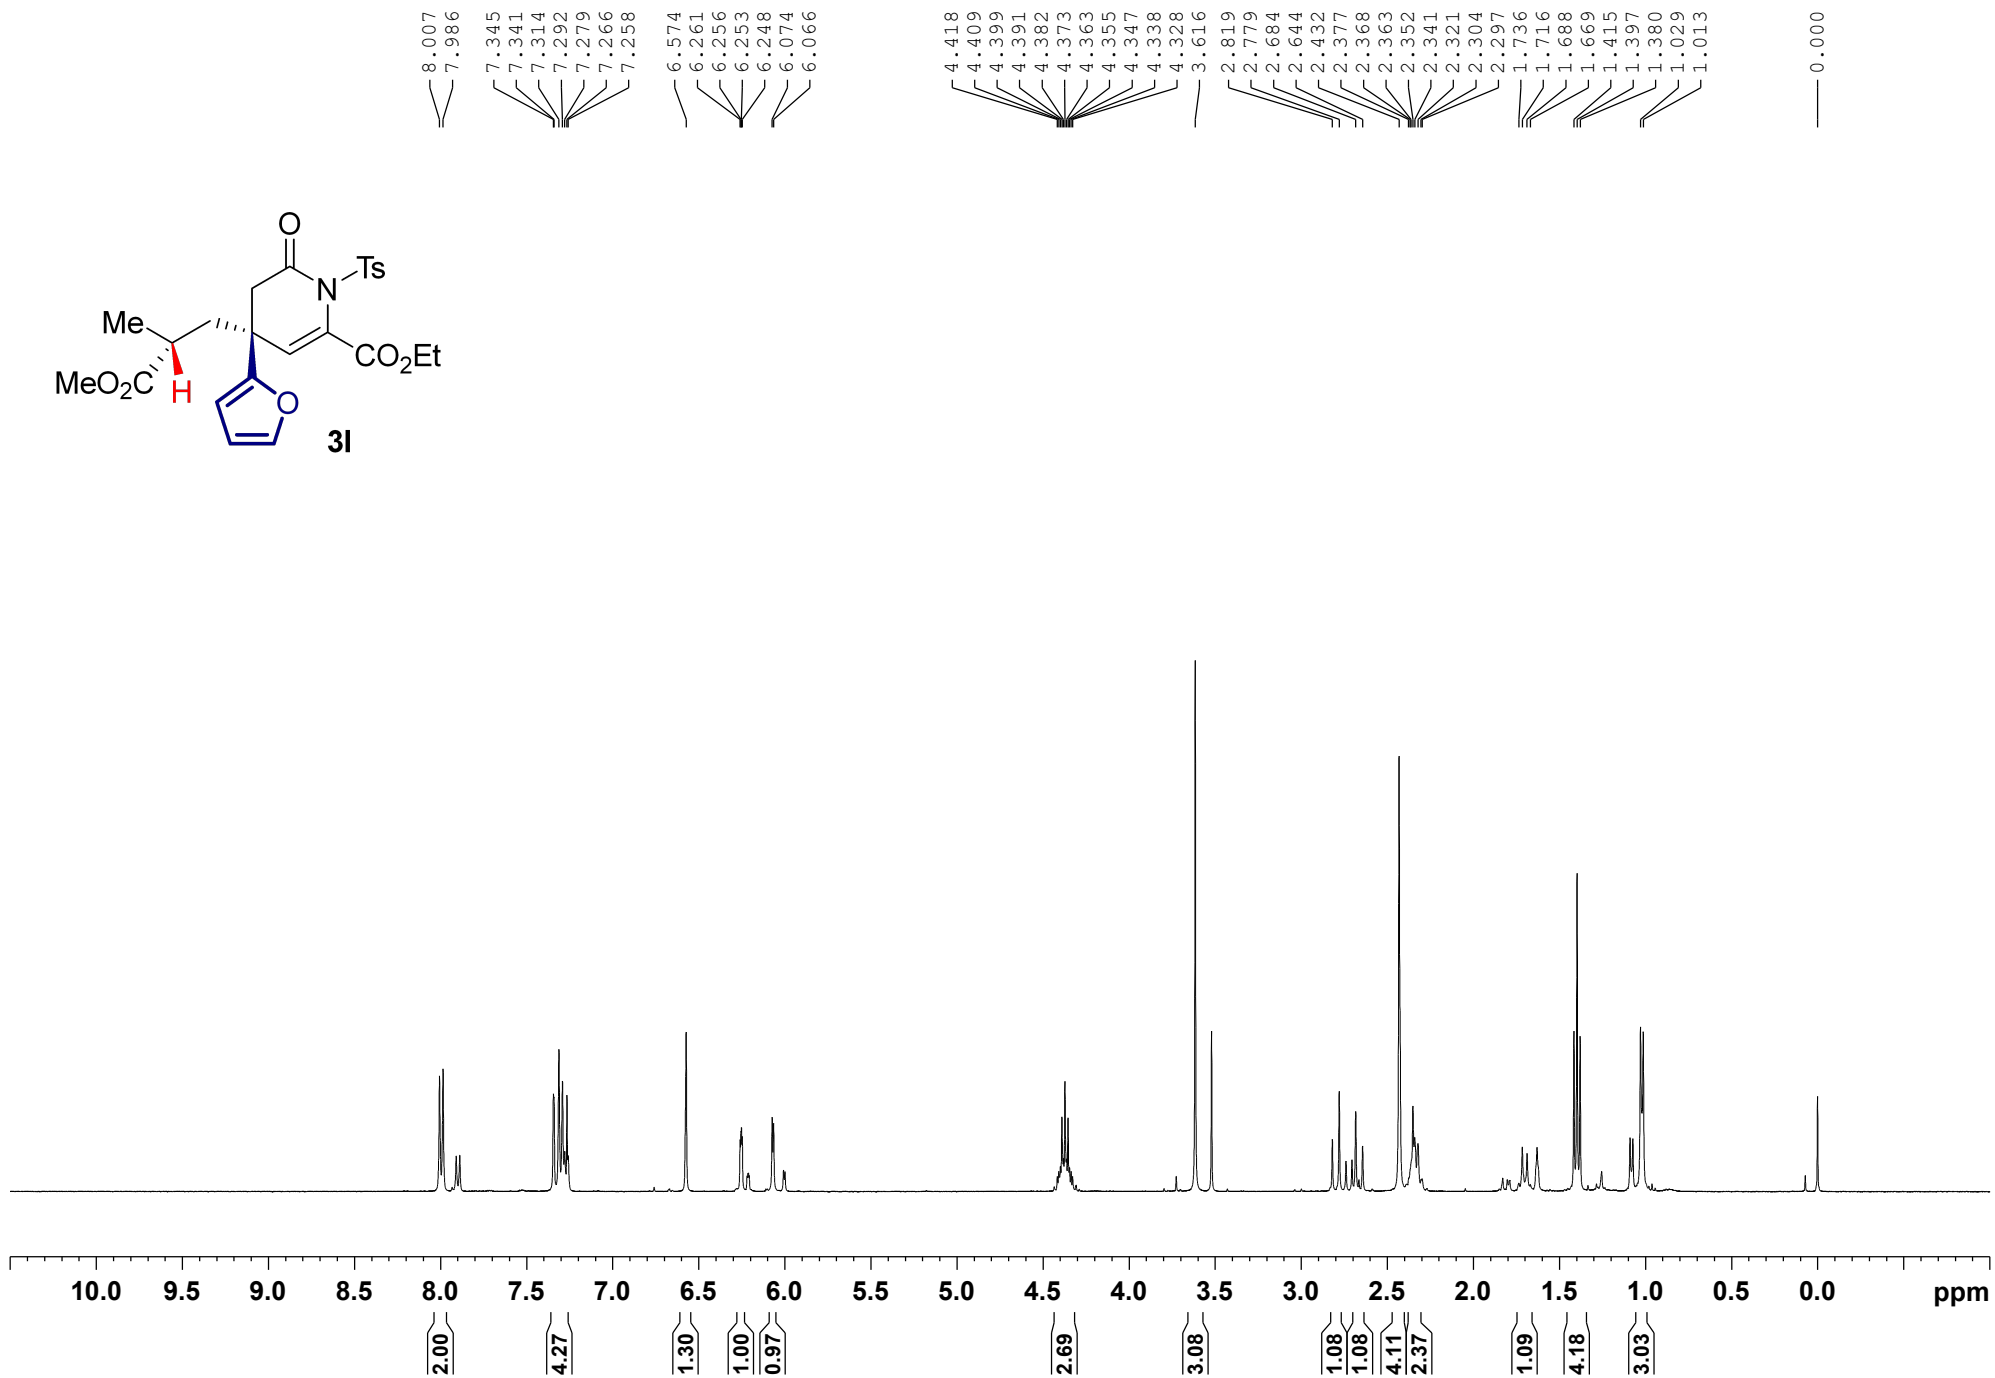

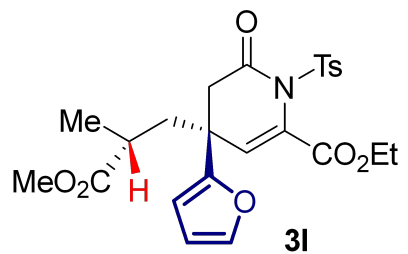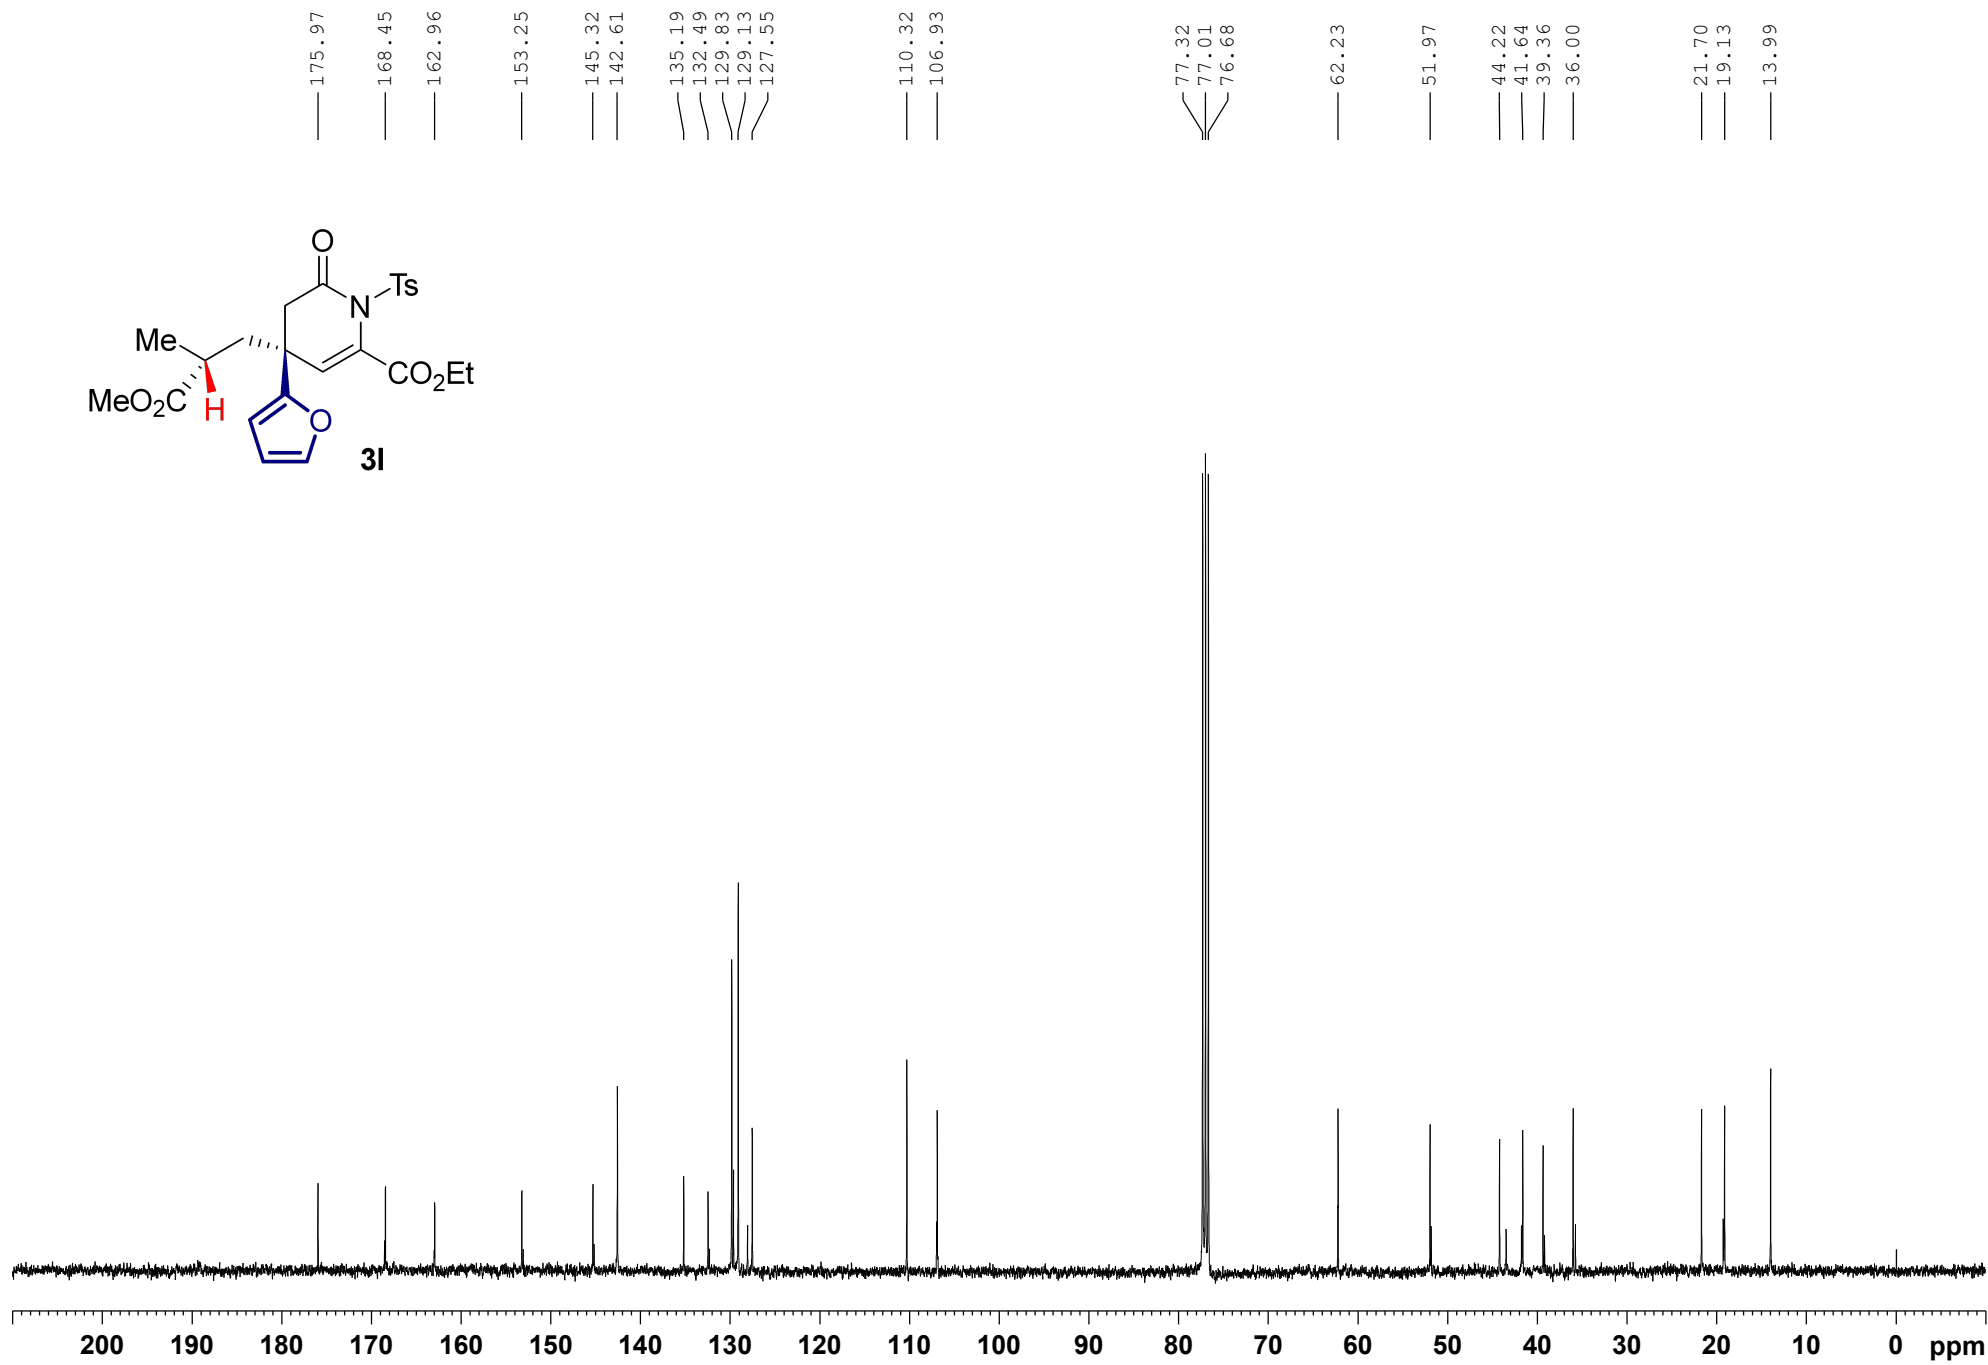

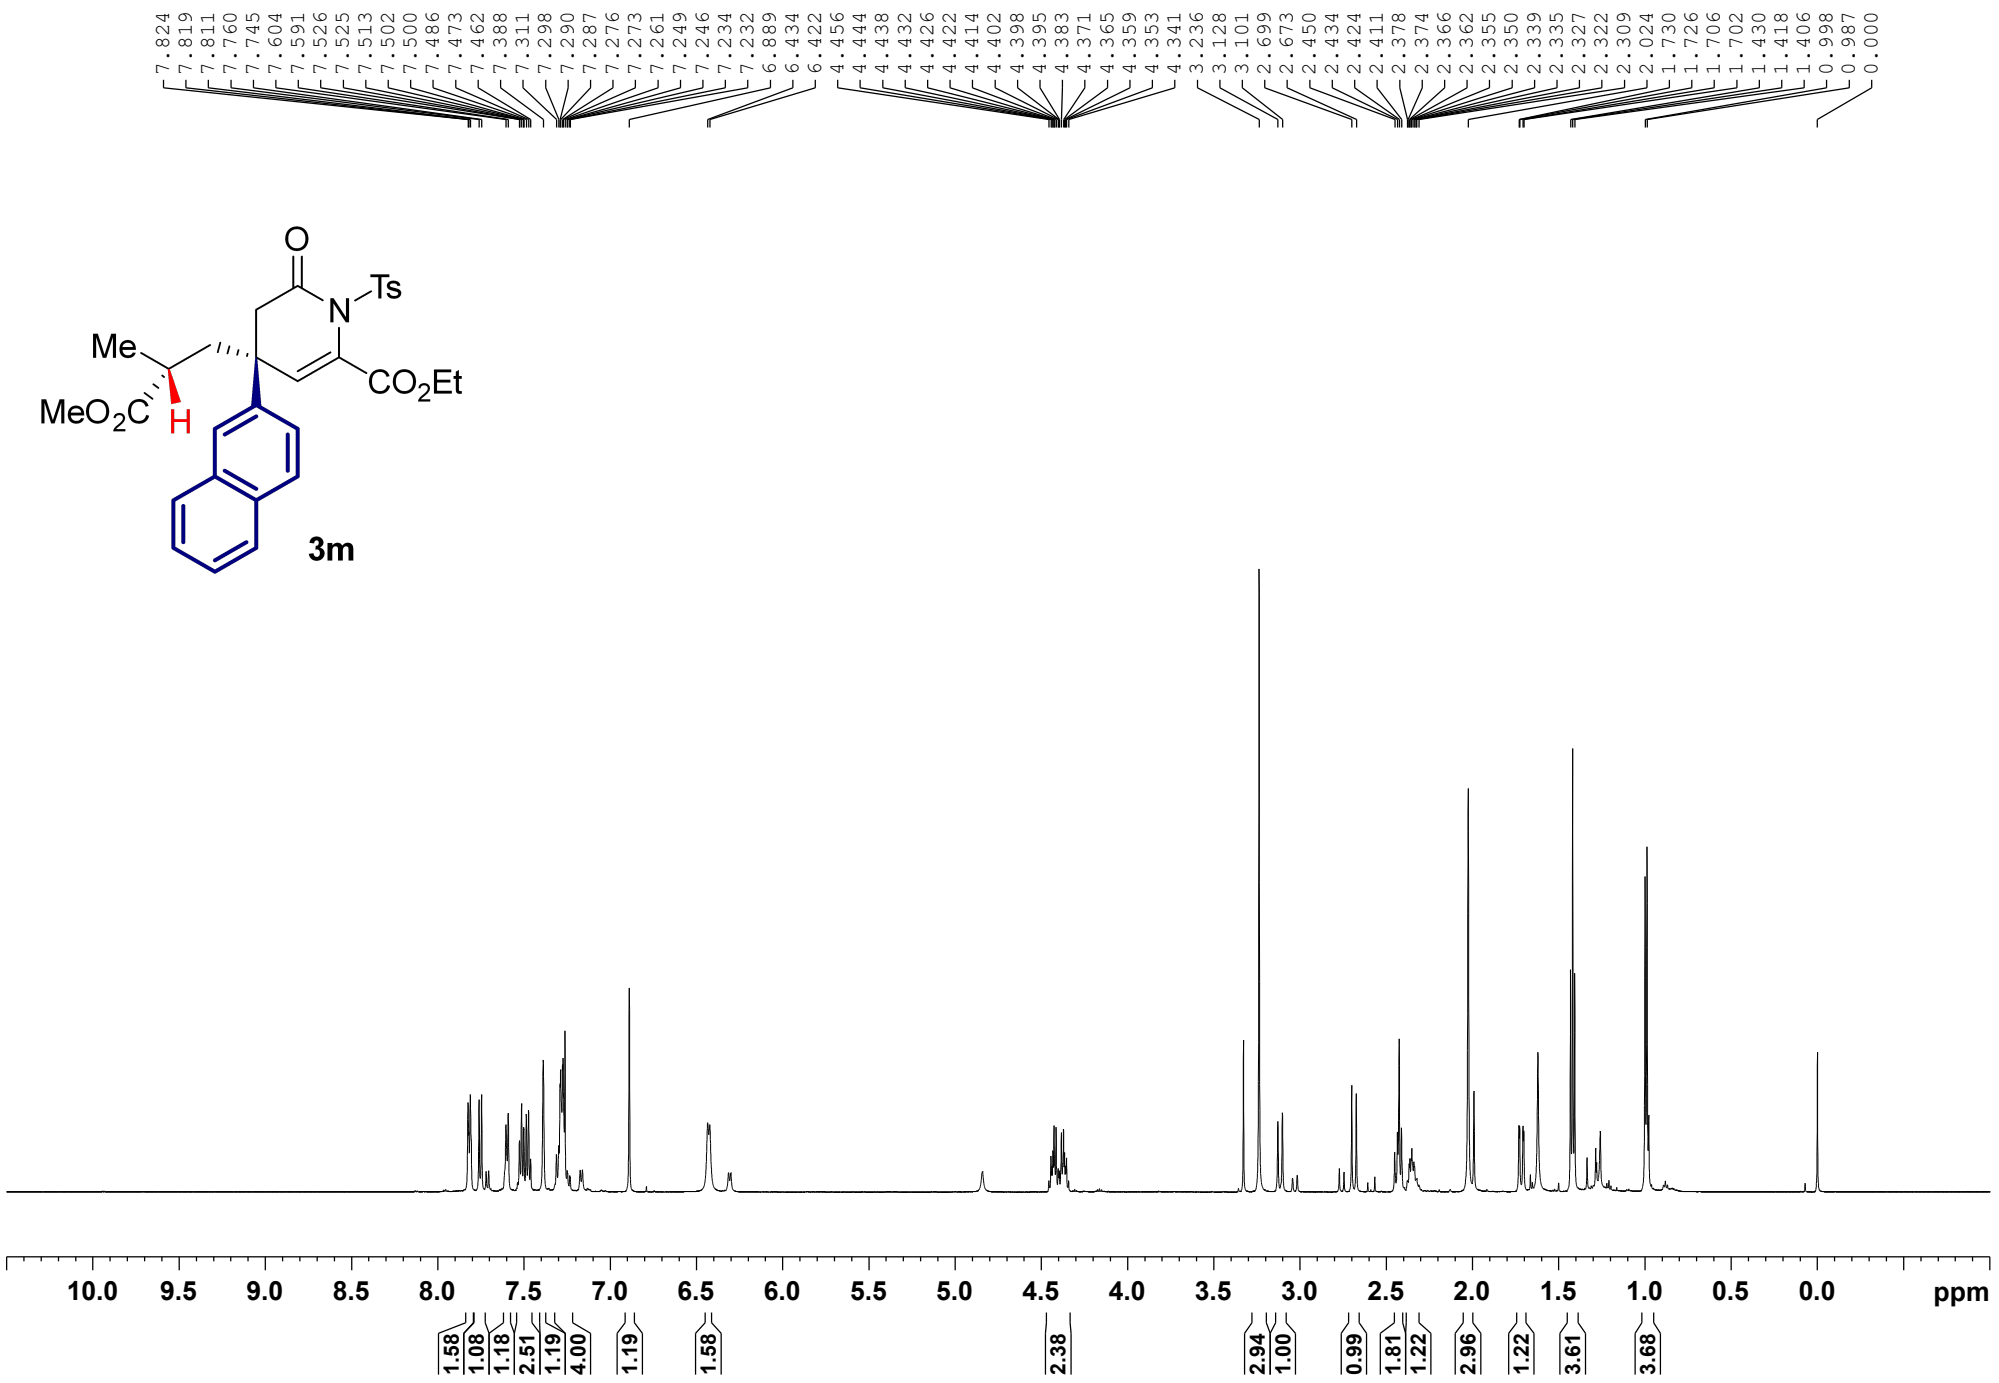

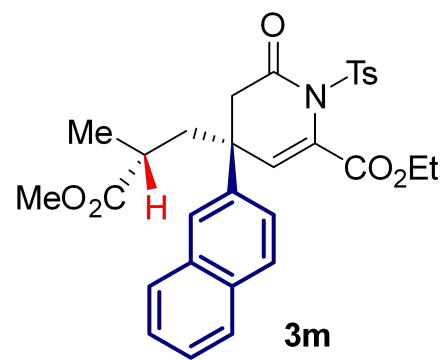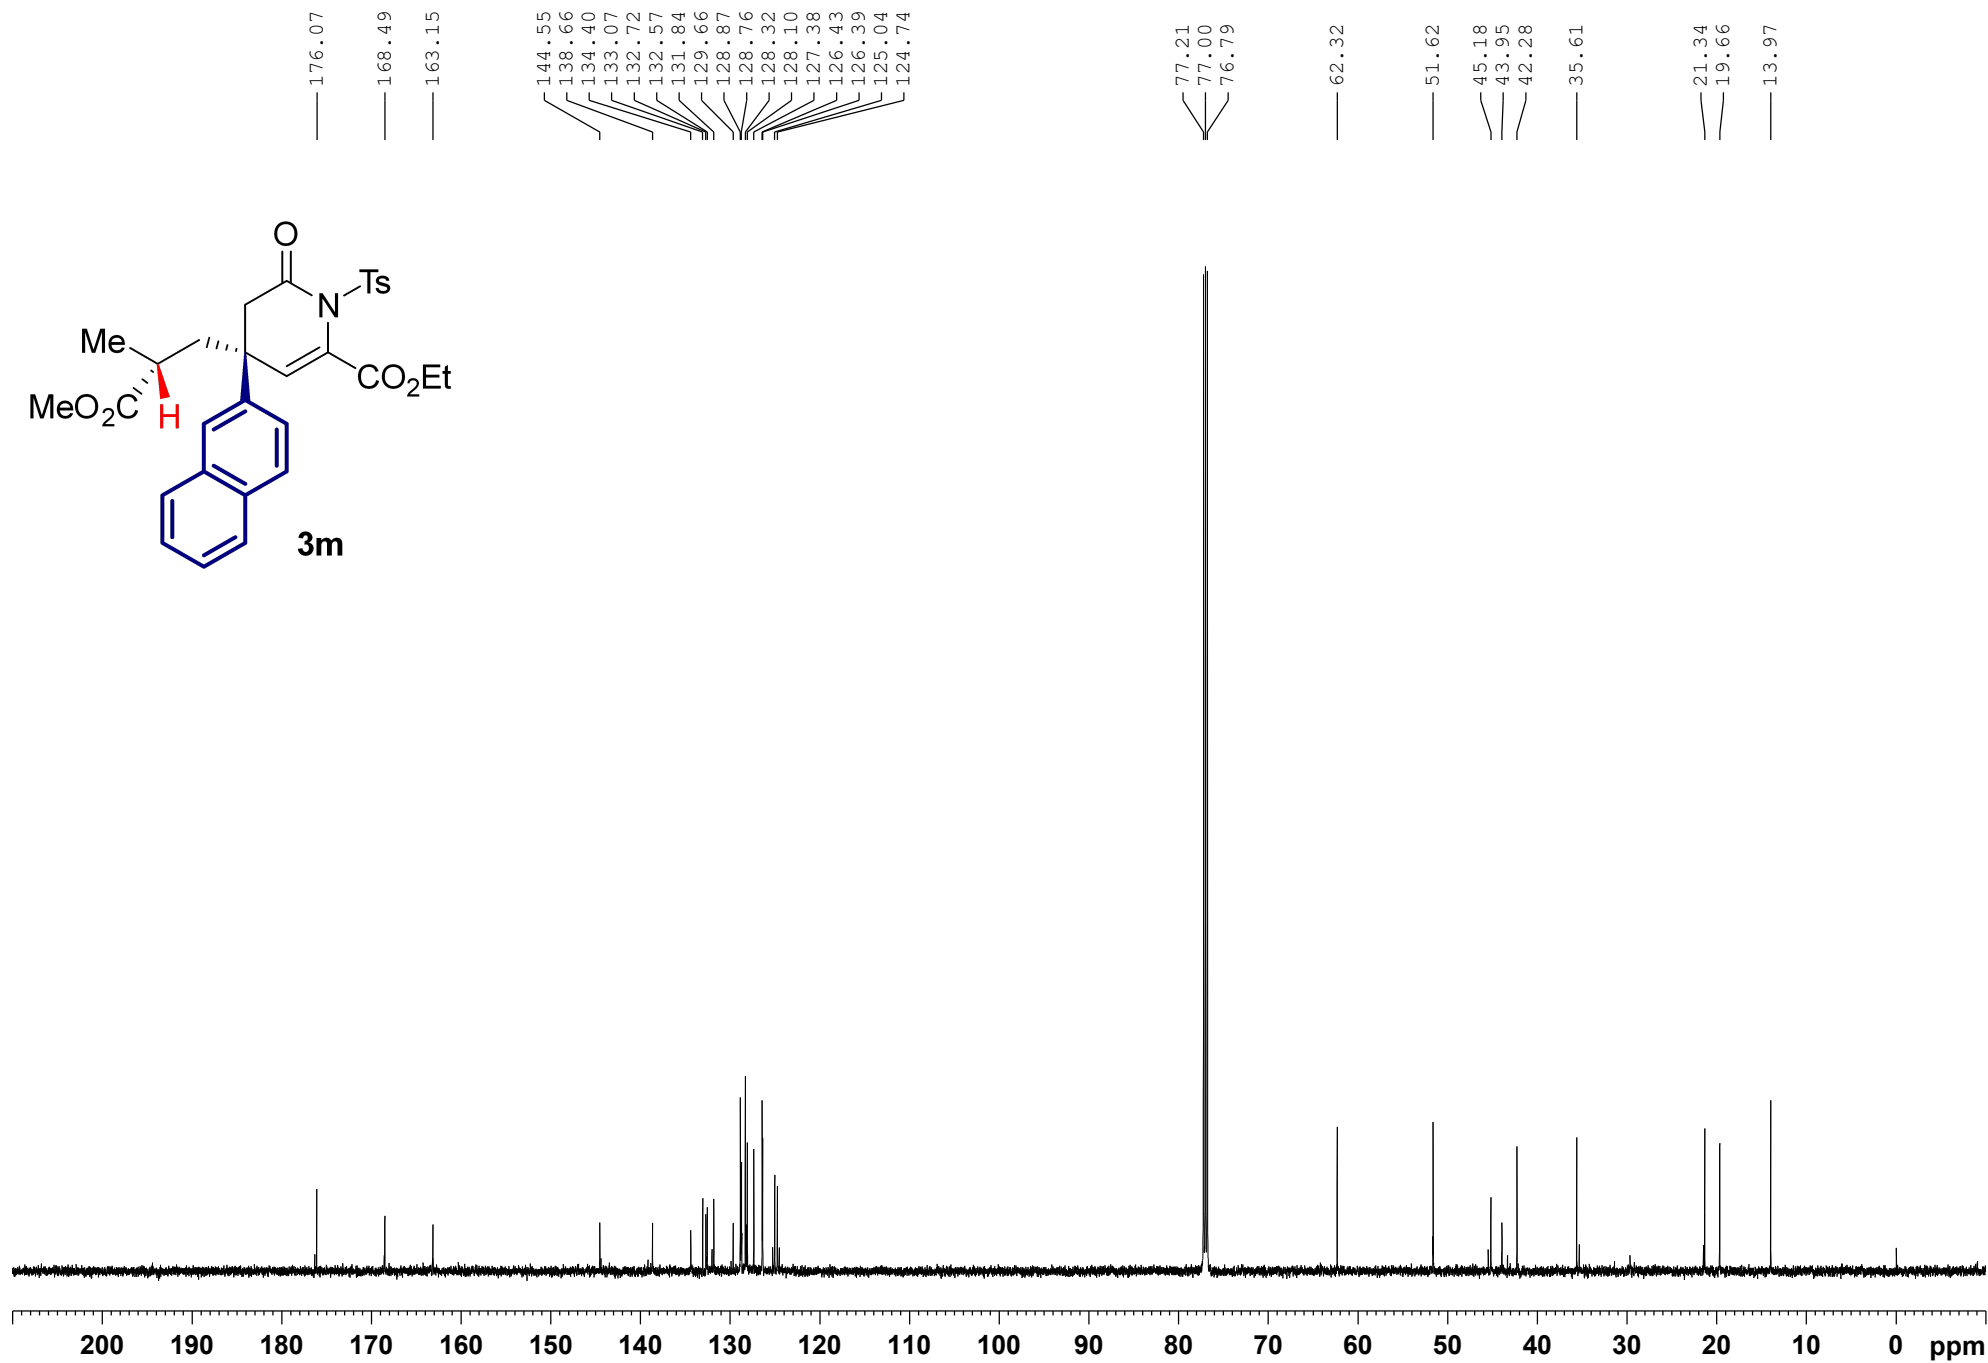

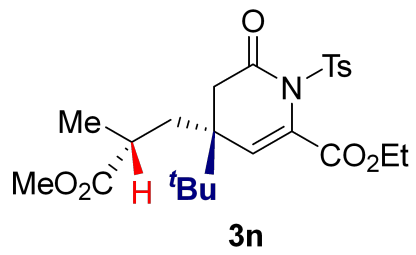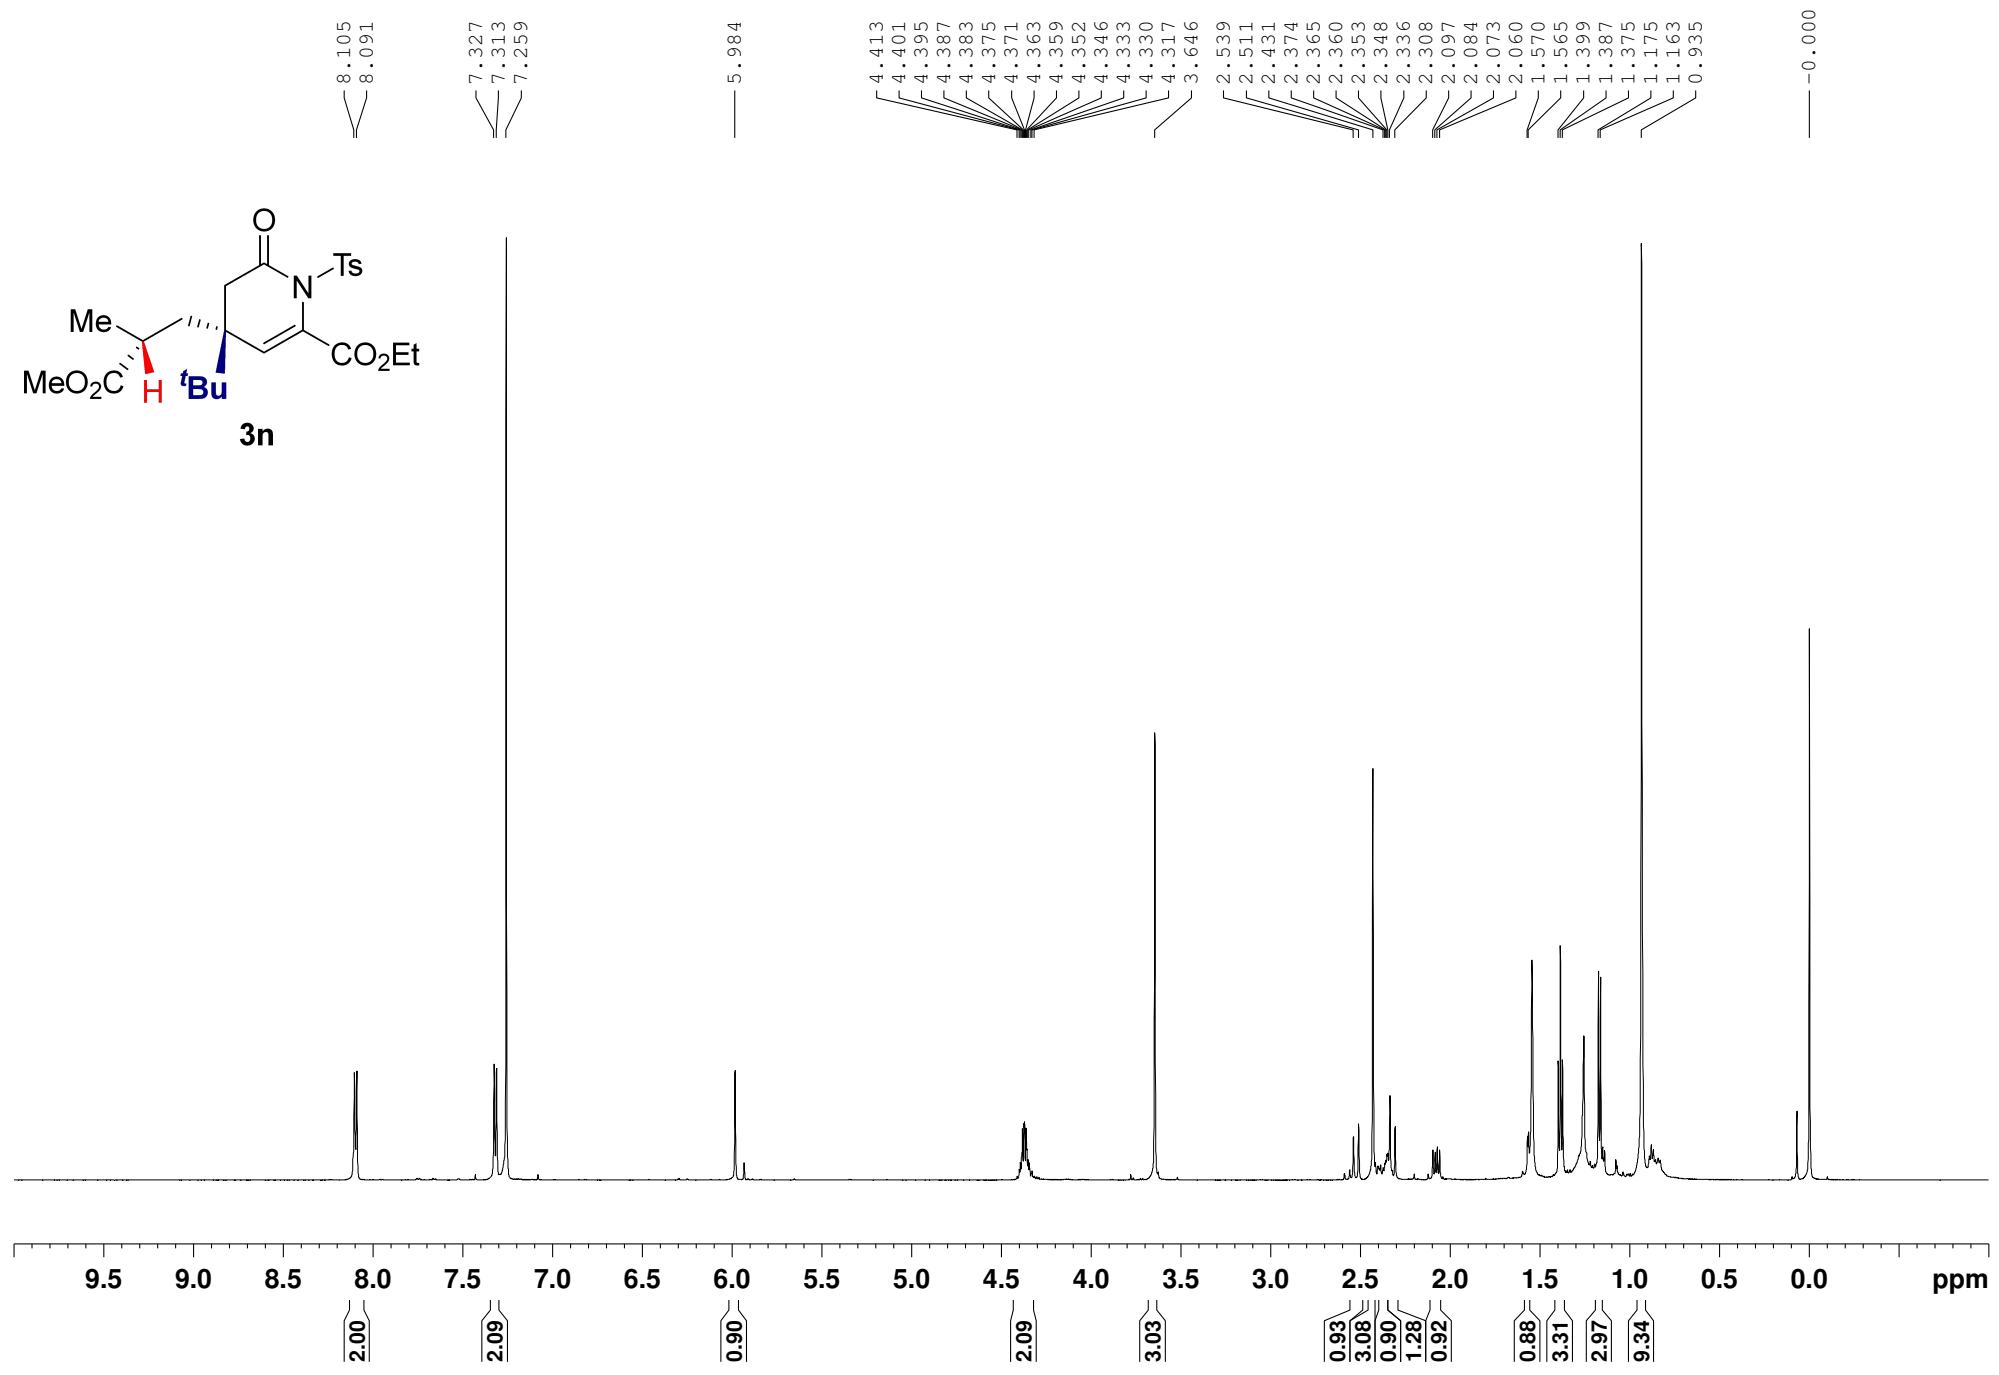

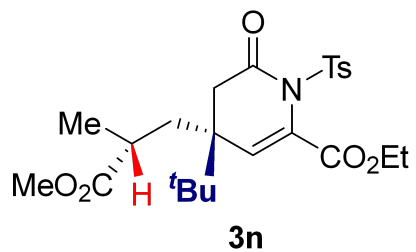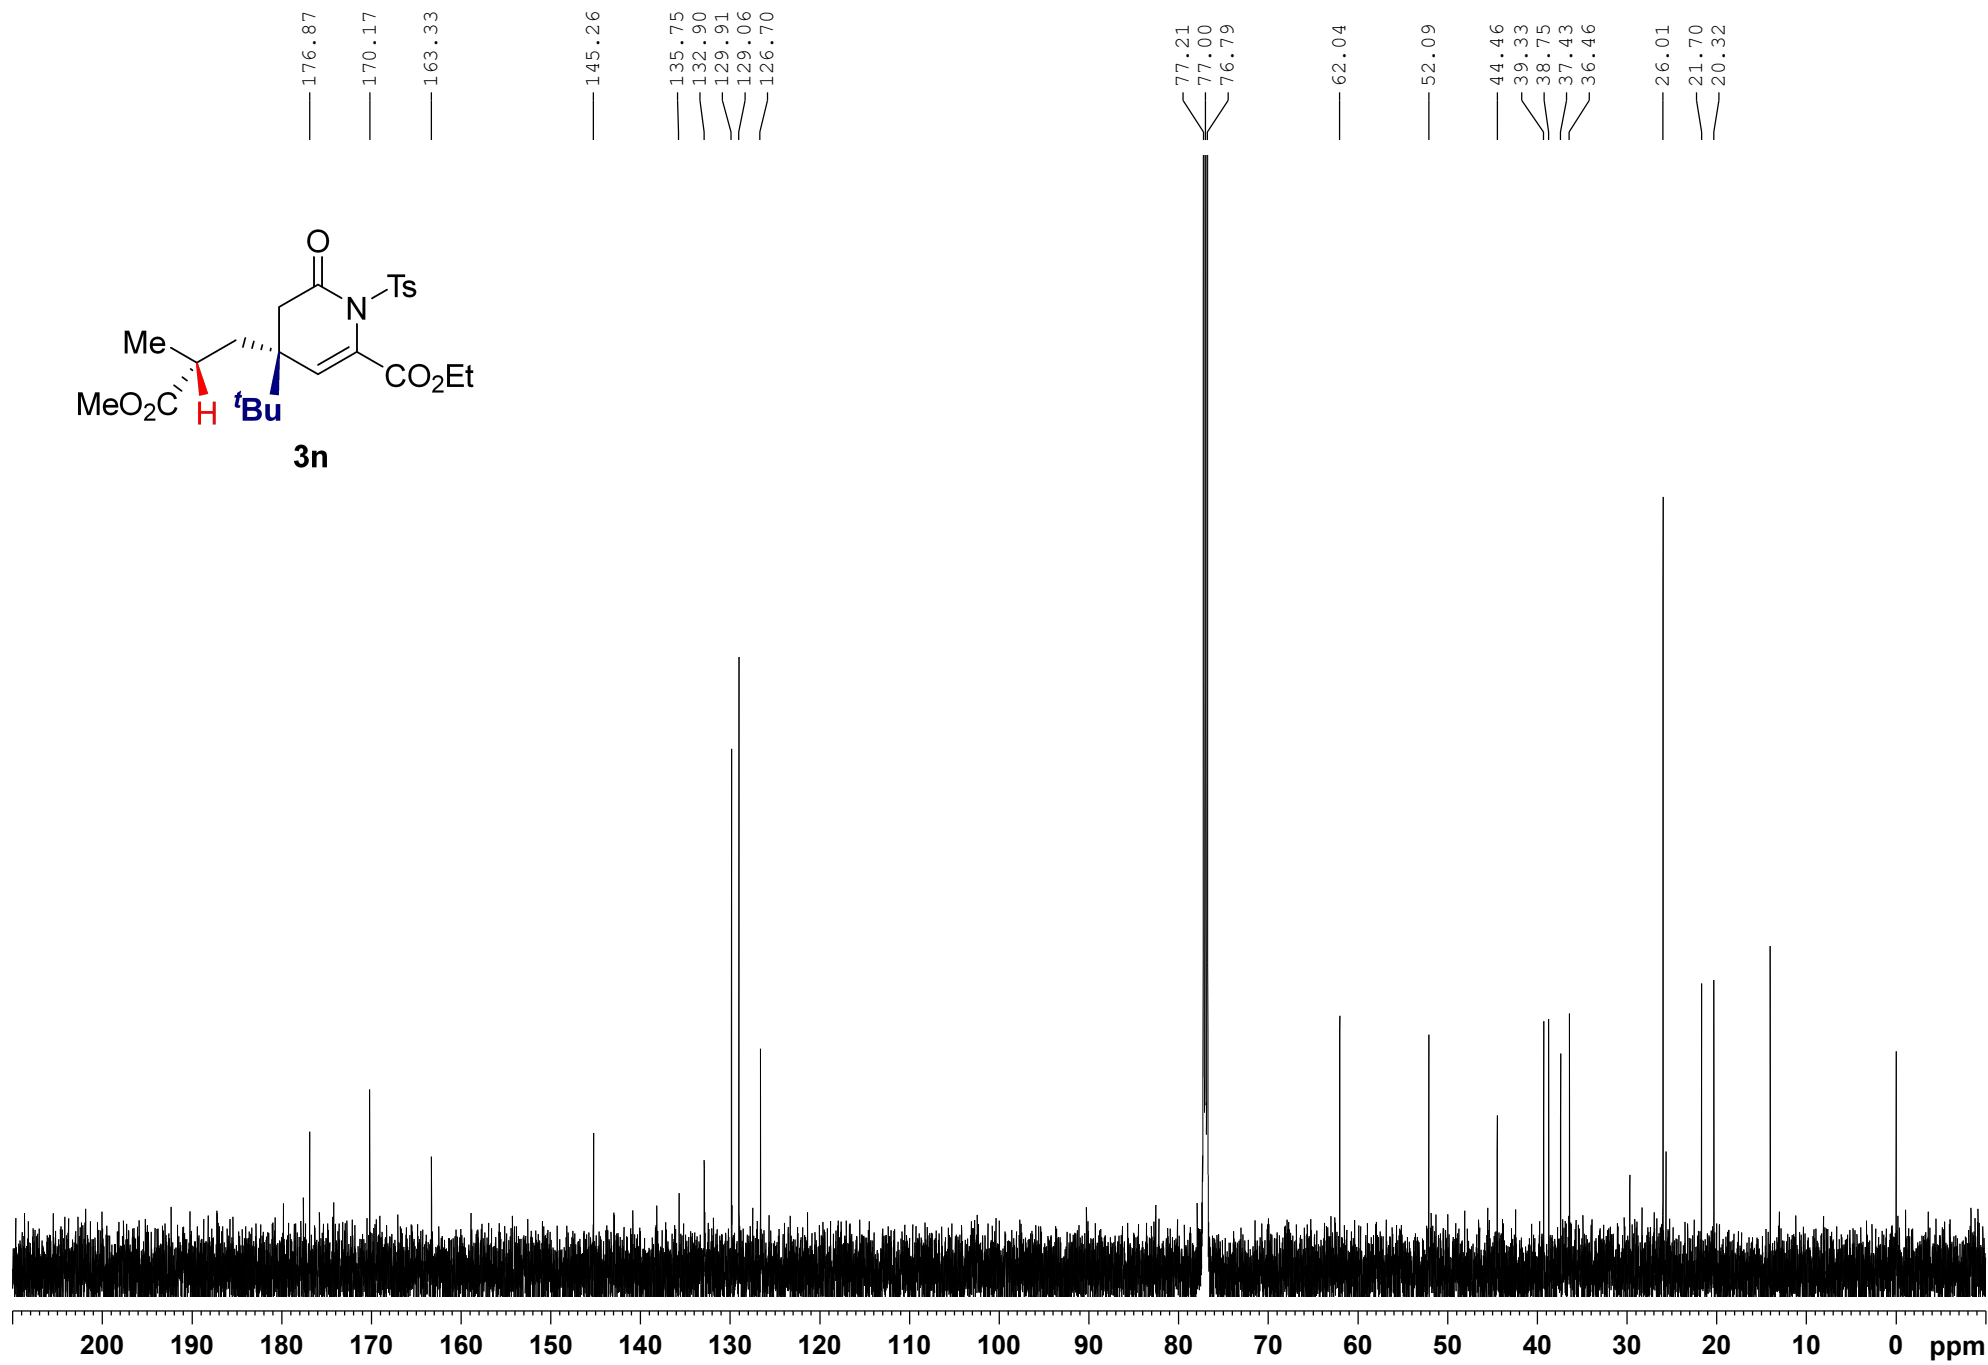



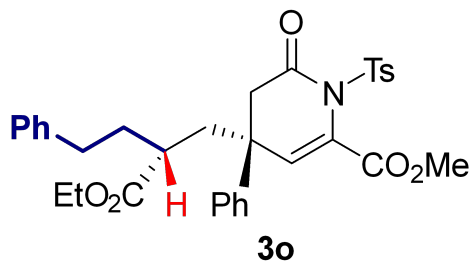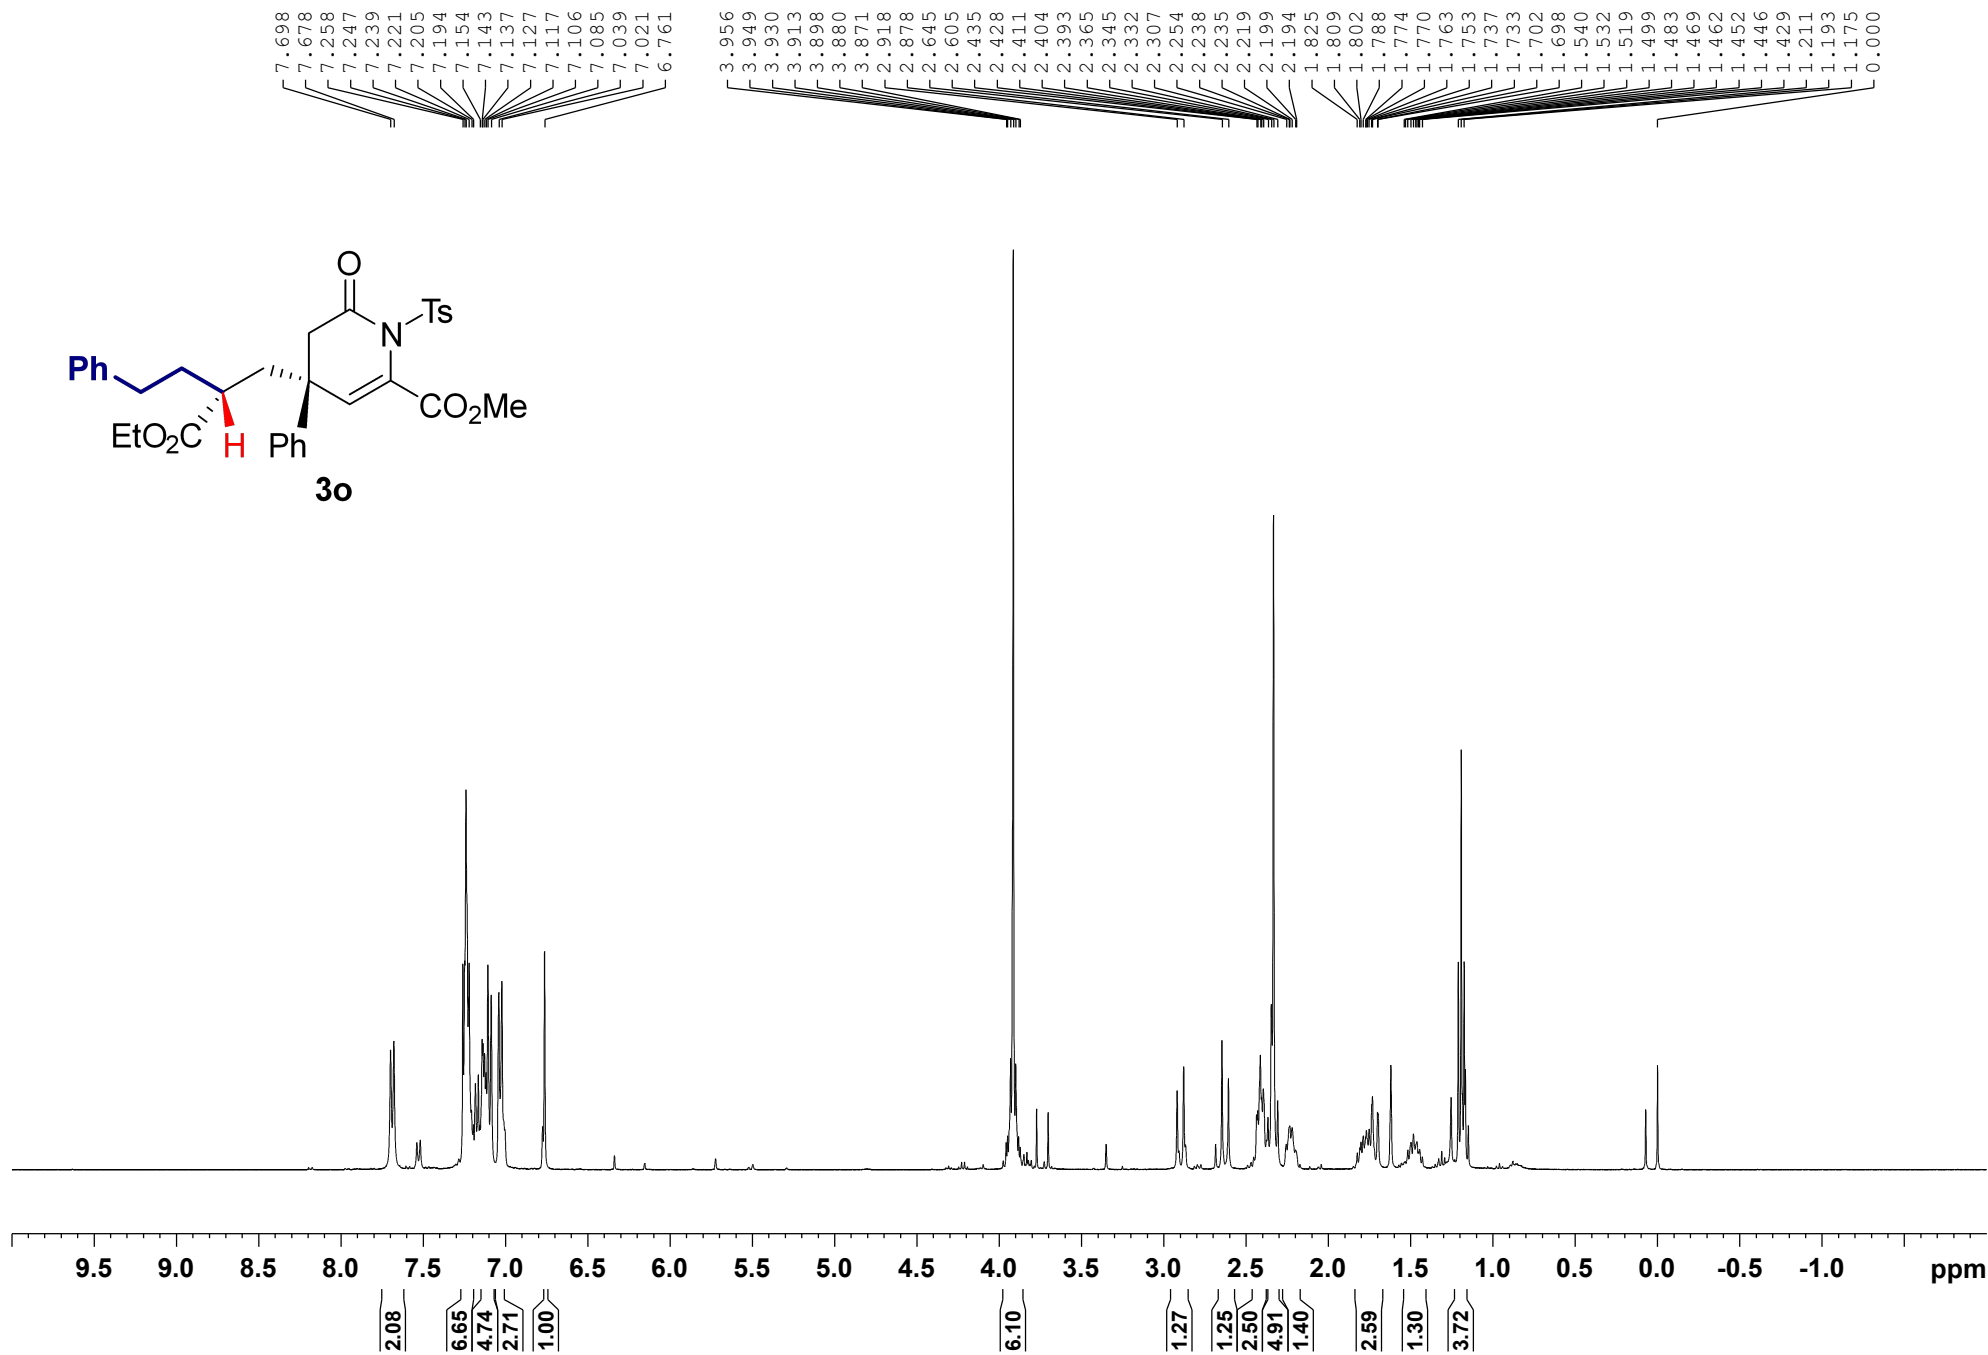

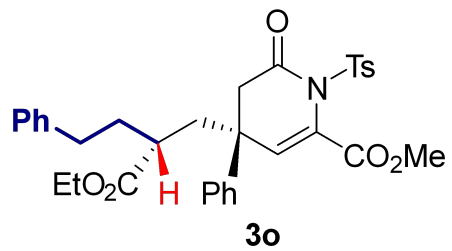

175.14  
168.66  
163.51

144.89  
141.04  
140.83  
134.88  
132.04  
131.93  
129.32  
128.97  
128.90  
128.38  
128.21  
127.49  
126.33  
126.04

77.32  
77.00  
76.68

60.71

52.82

44.67  
43.18  
42.23  
41.12  
35.94  
33.08

21.56

14.01

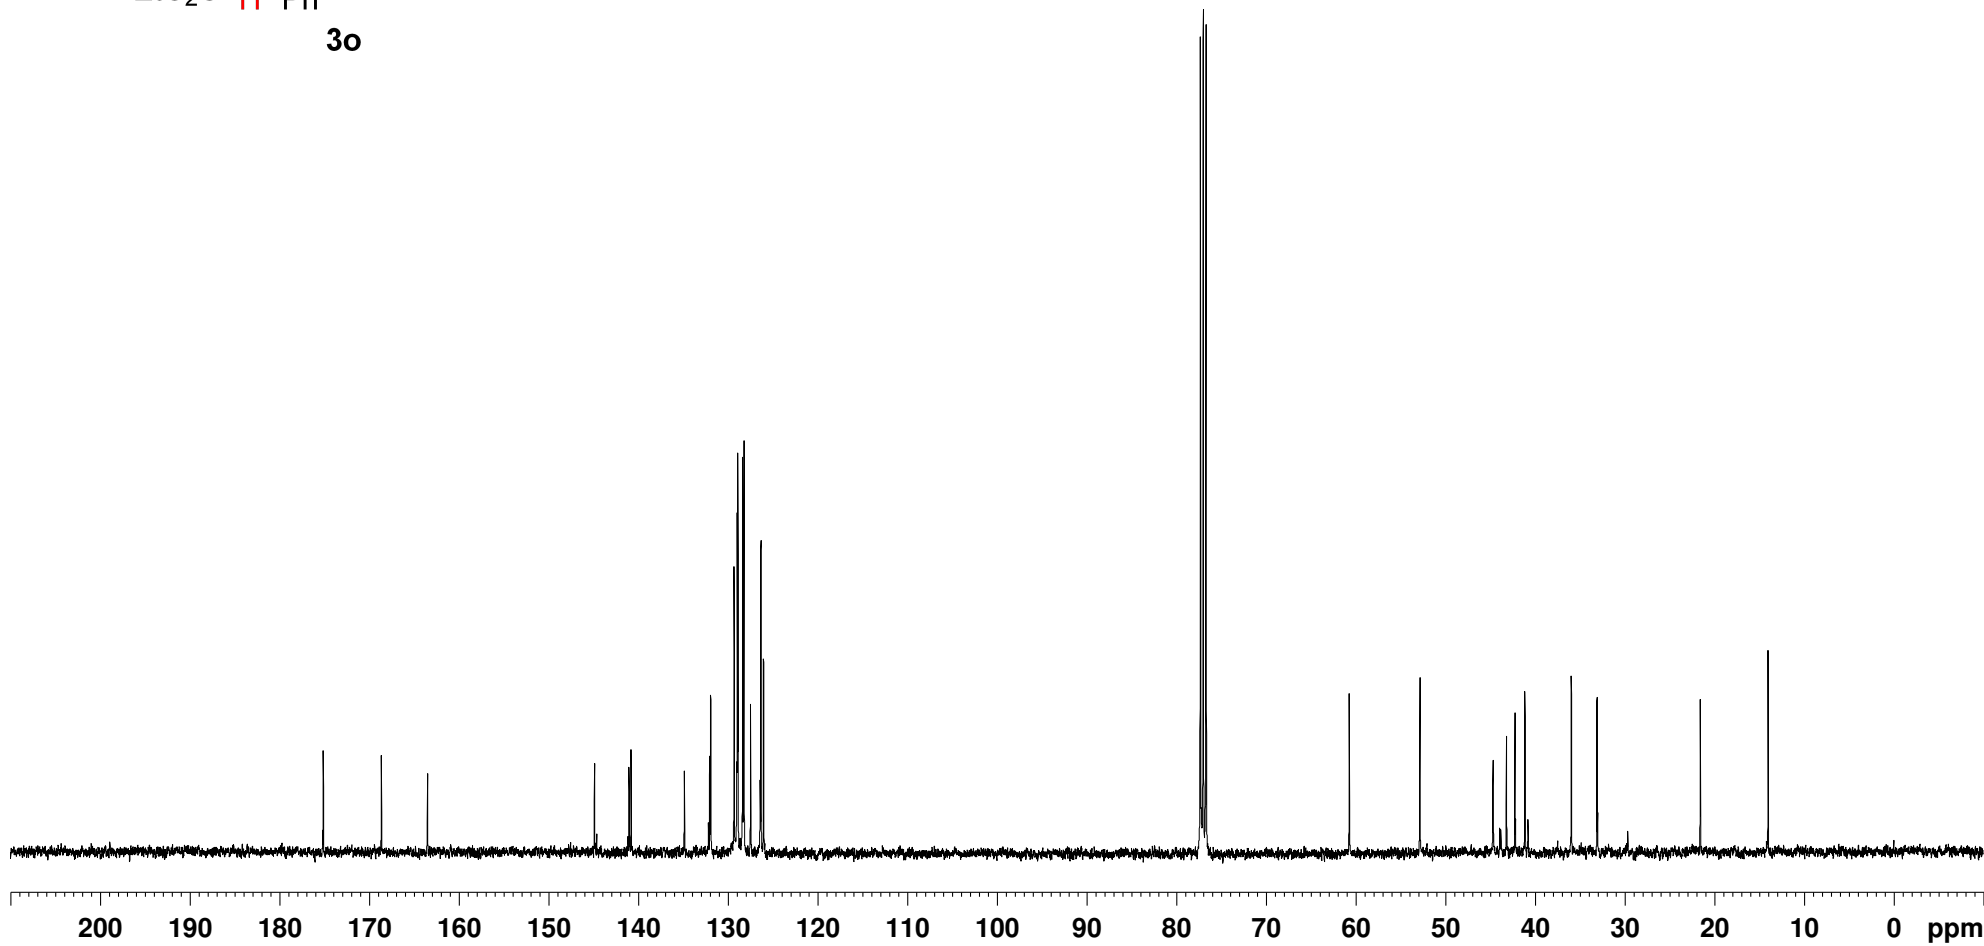

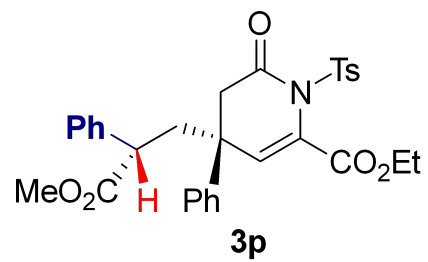

7.645  
7.624  
7.259  
7.245  
7.236  
7.223  
7.140  
7.136  
7.126  
7.116  
7.100  
7.096  
7.081  
7.061  
6.729

4.428  
4.411  
4.402  
4.390  
4.384  
4.372  
4.366  
4.355  
4.348  
4.337  
4.328  
3.511  
2.898  
2.857  
2.819  
2.778  
2.761  
2.741  
2.726  
2.705  
2.664  
2.536  
2.496  
2.365  
2.164  
2.151  
2.128  
2.116  
1.418  
1.400  
1.382

0.000

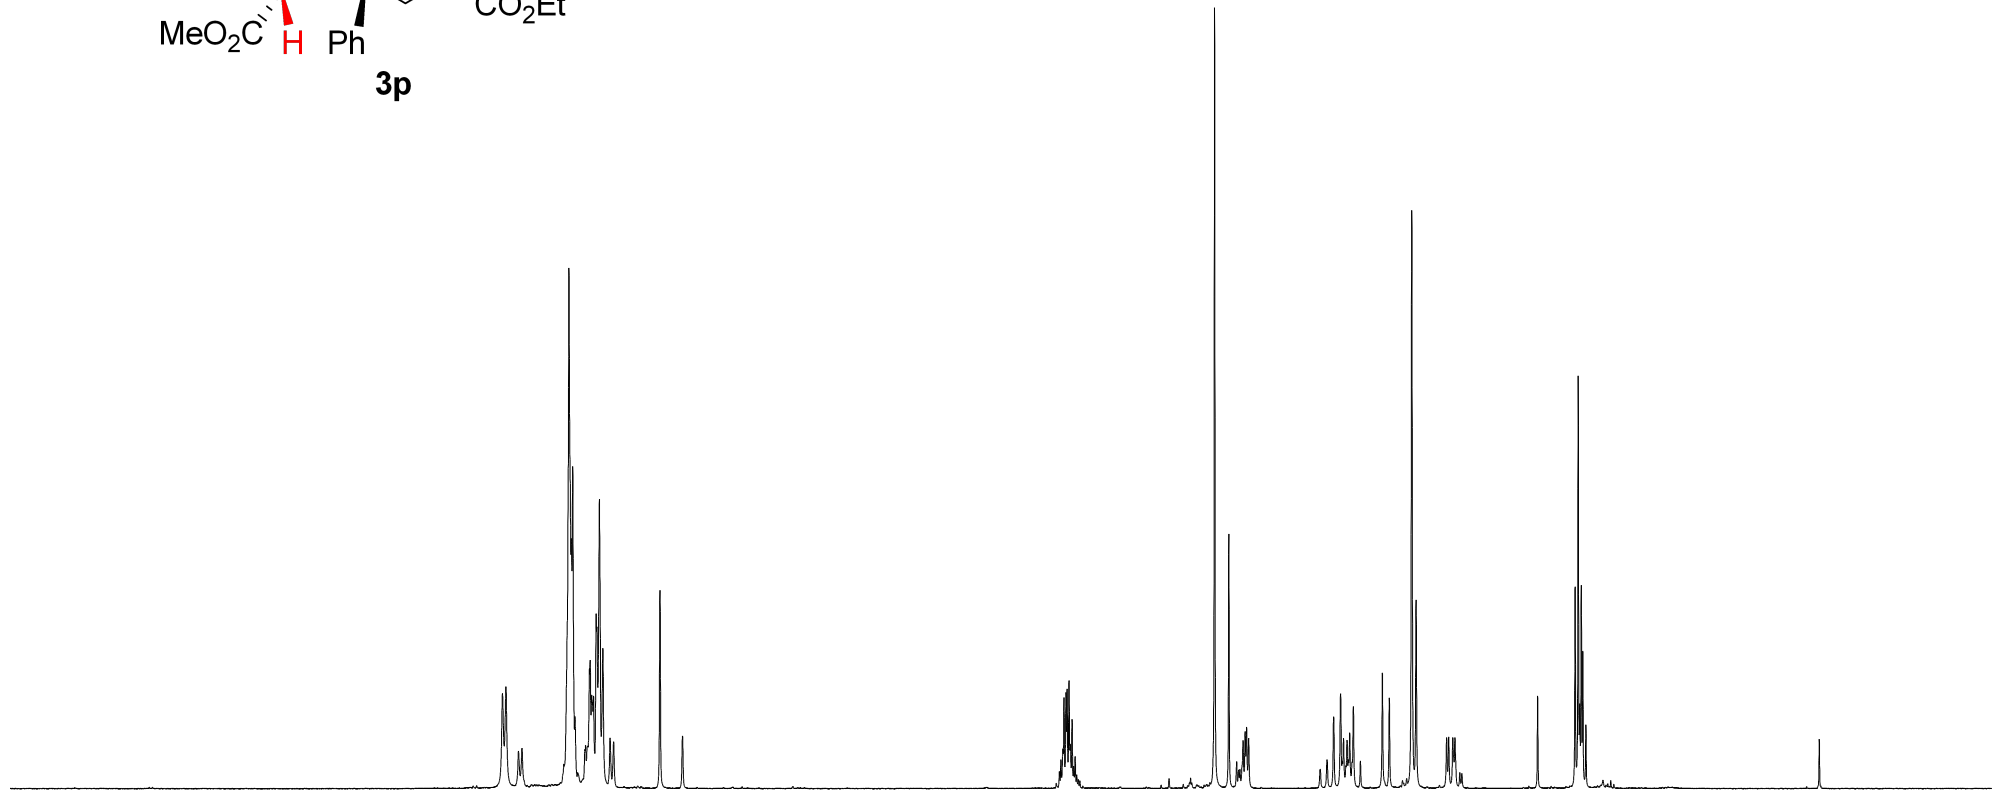

10.0 9.5 9.0 8.5 8.0 7.5 7.0 6.5 6.0 5.5 5.0 4.5 4.0 3.5 3.0 2.5 2.0 1.5 1.0 0.5 0.0 ppm

1.96 6.25 6.50 1.00 2.54 3.06 1.12 2.89 1.04 2.94 1.15 3.13

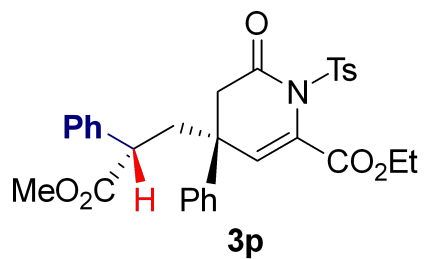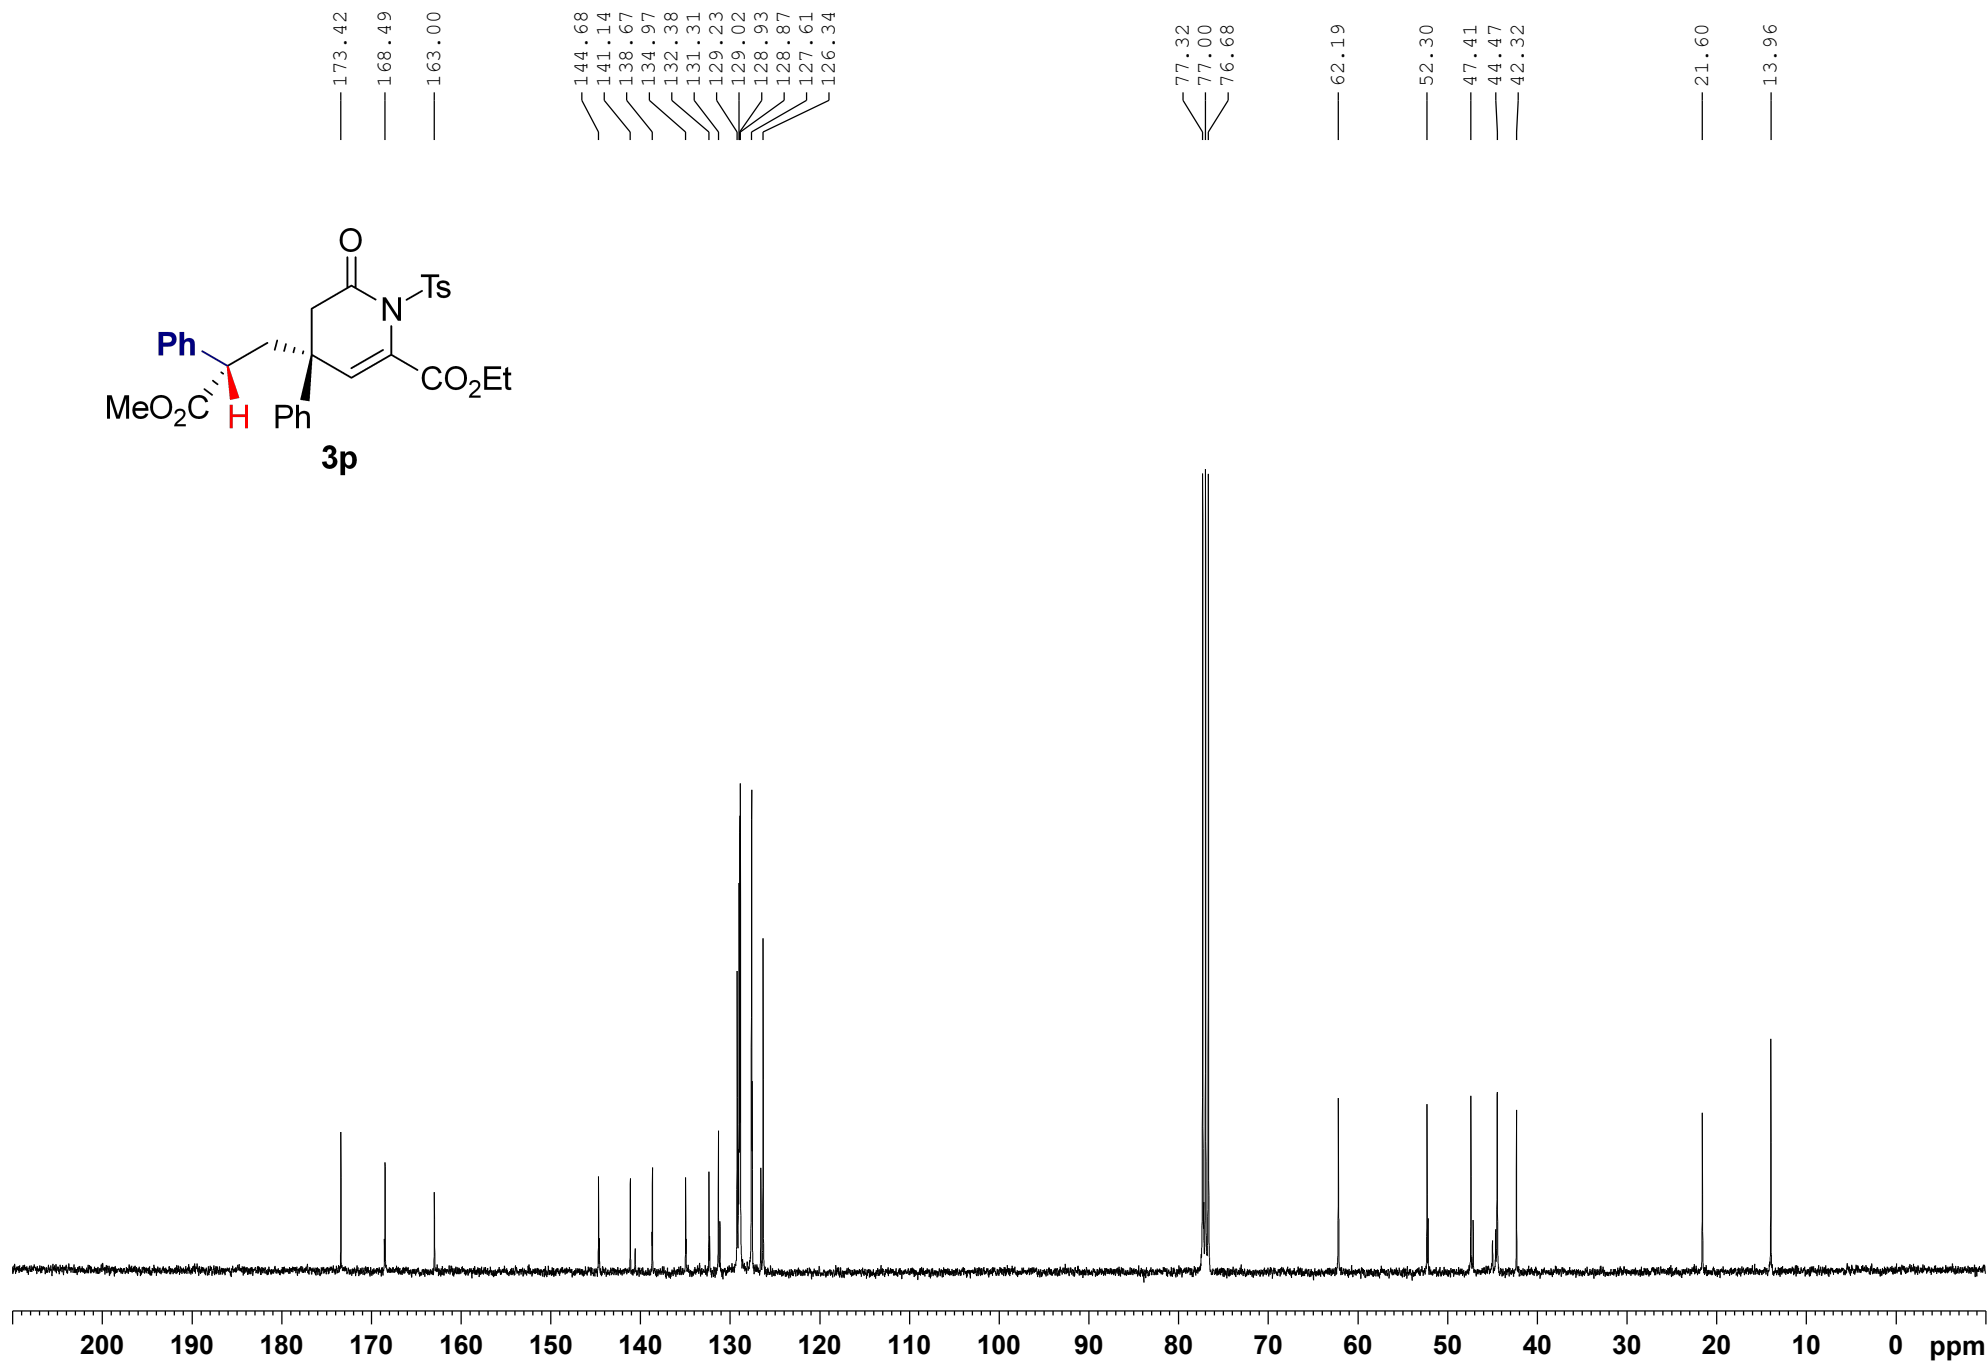

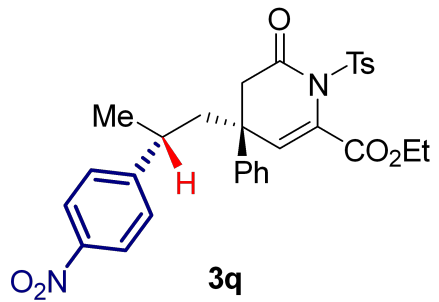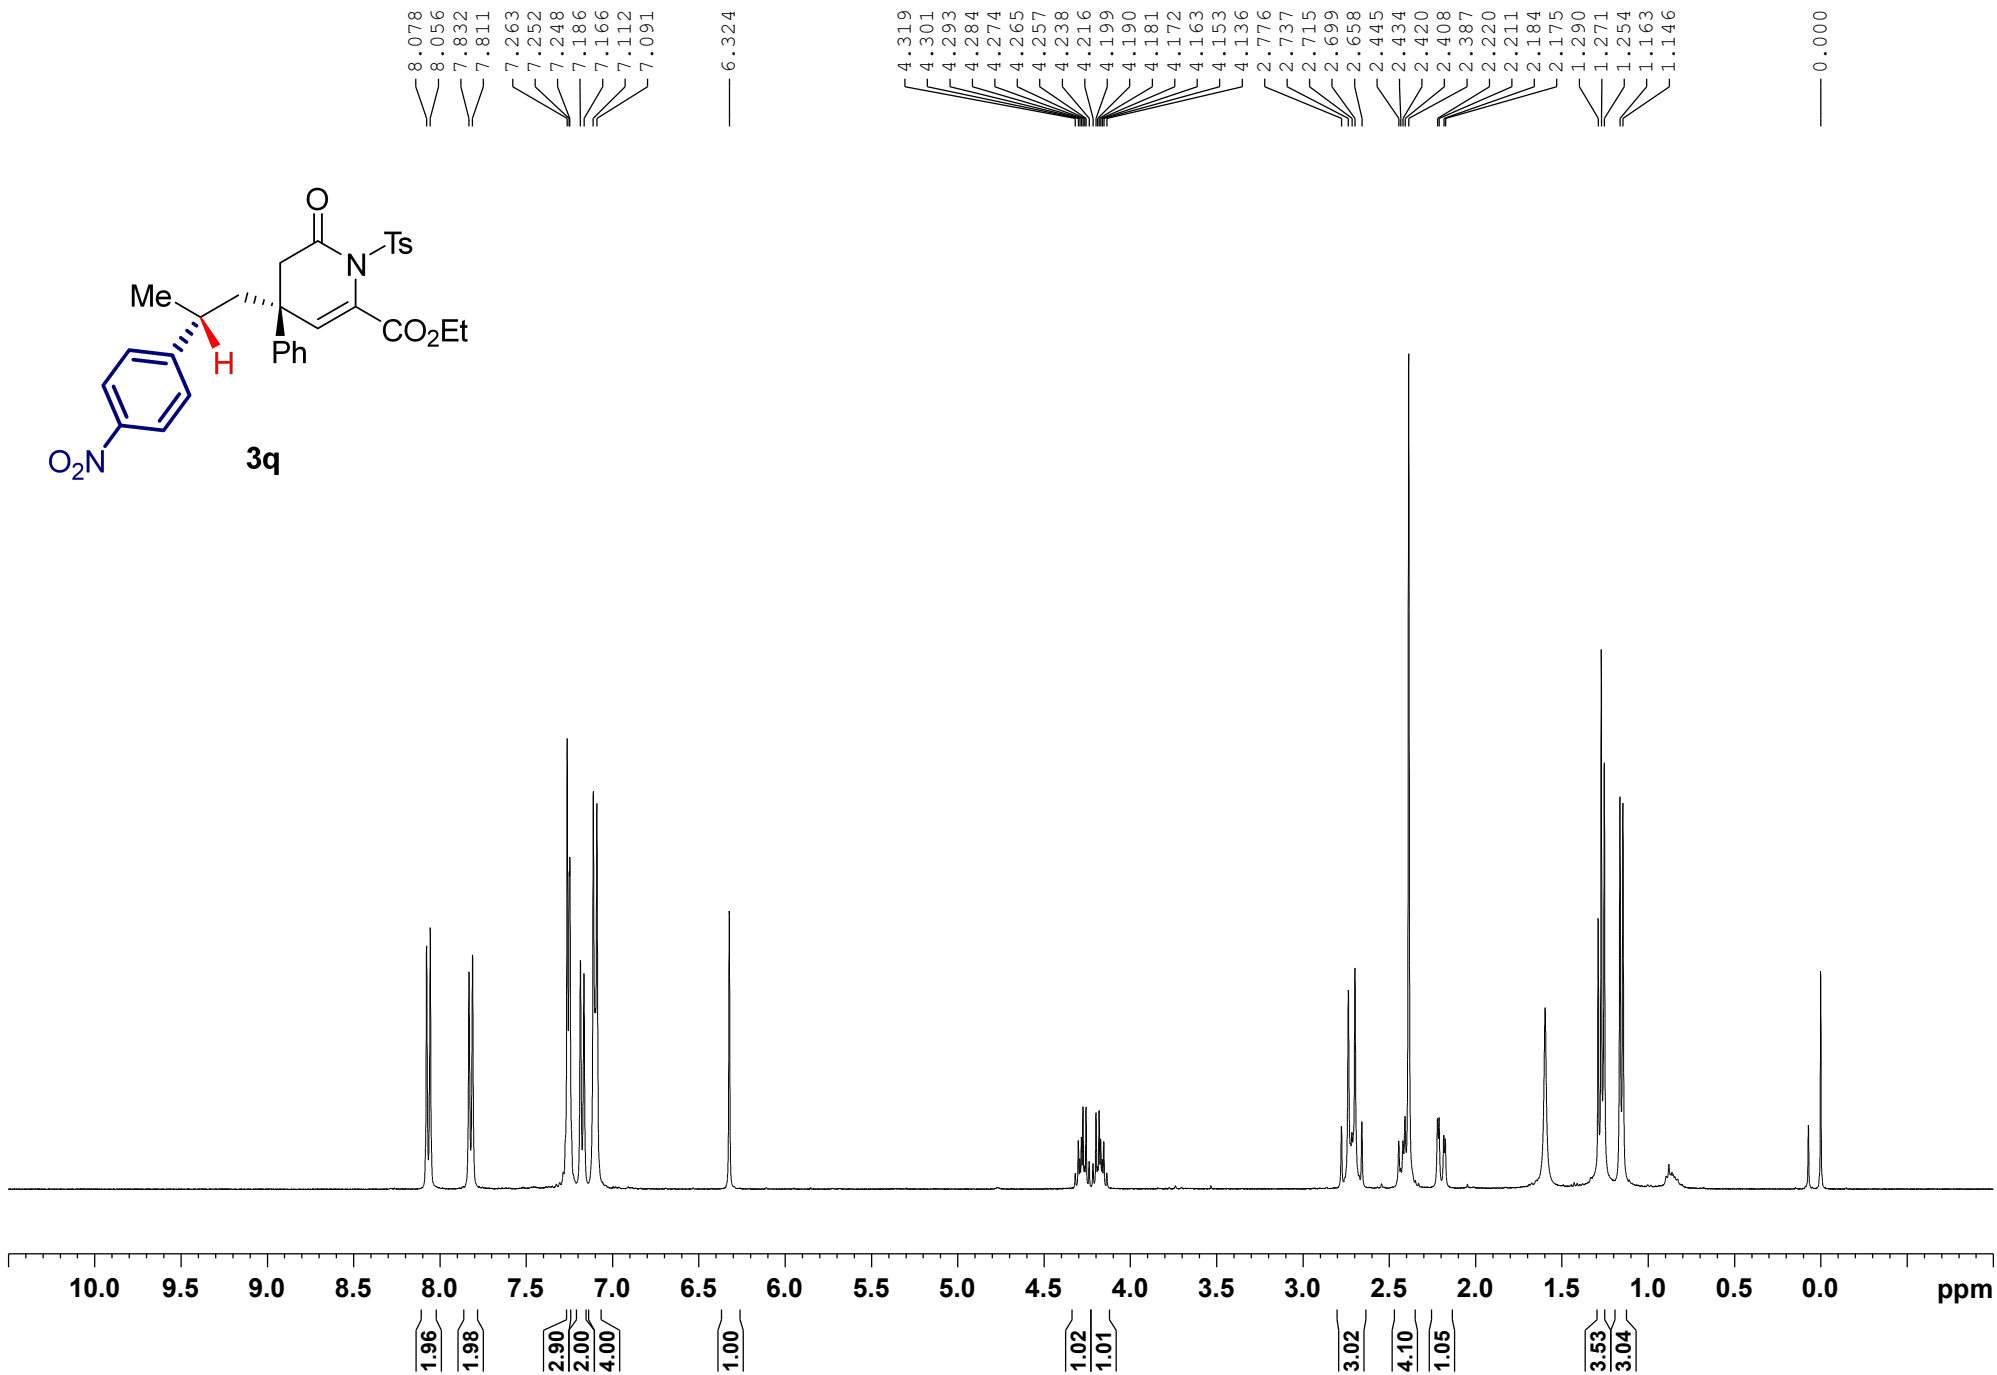

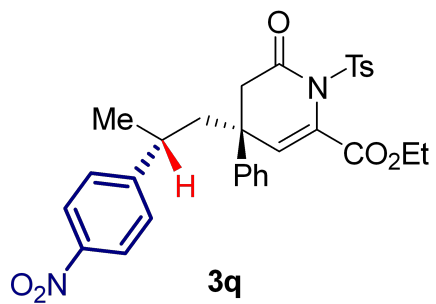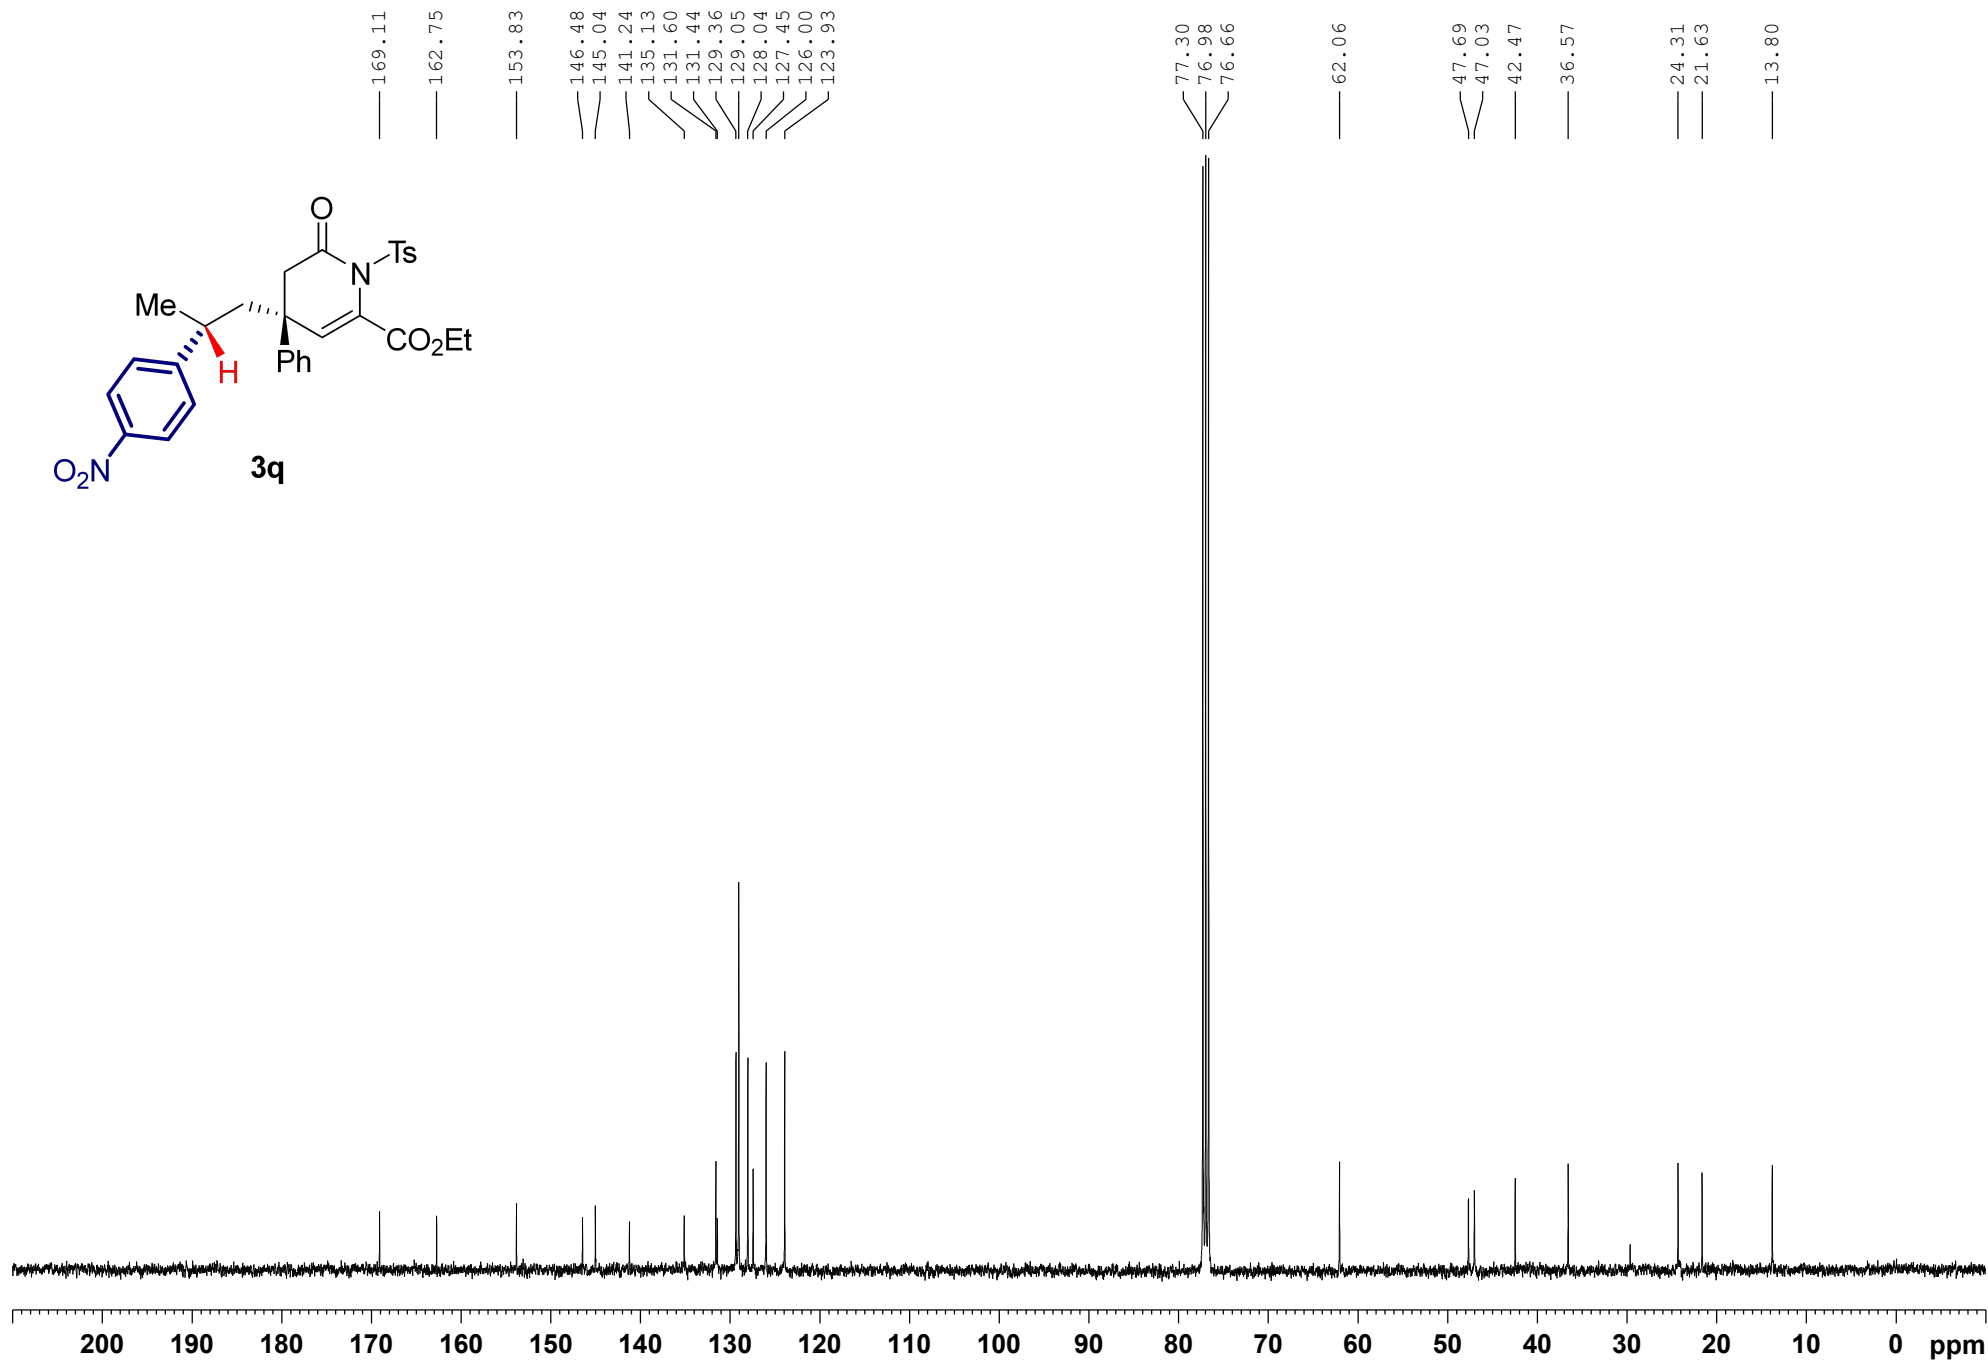

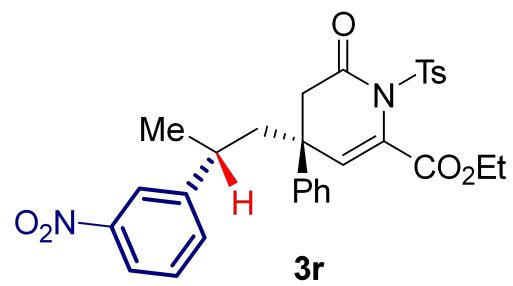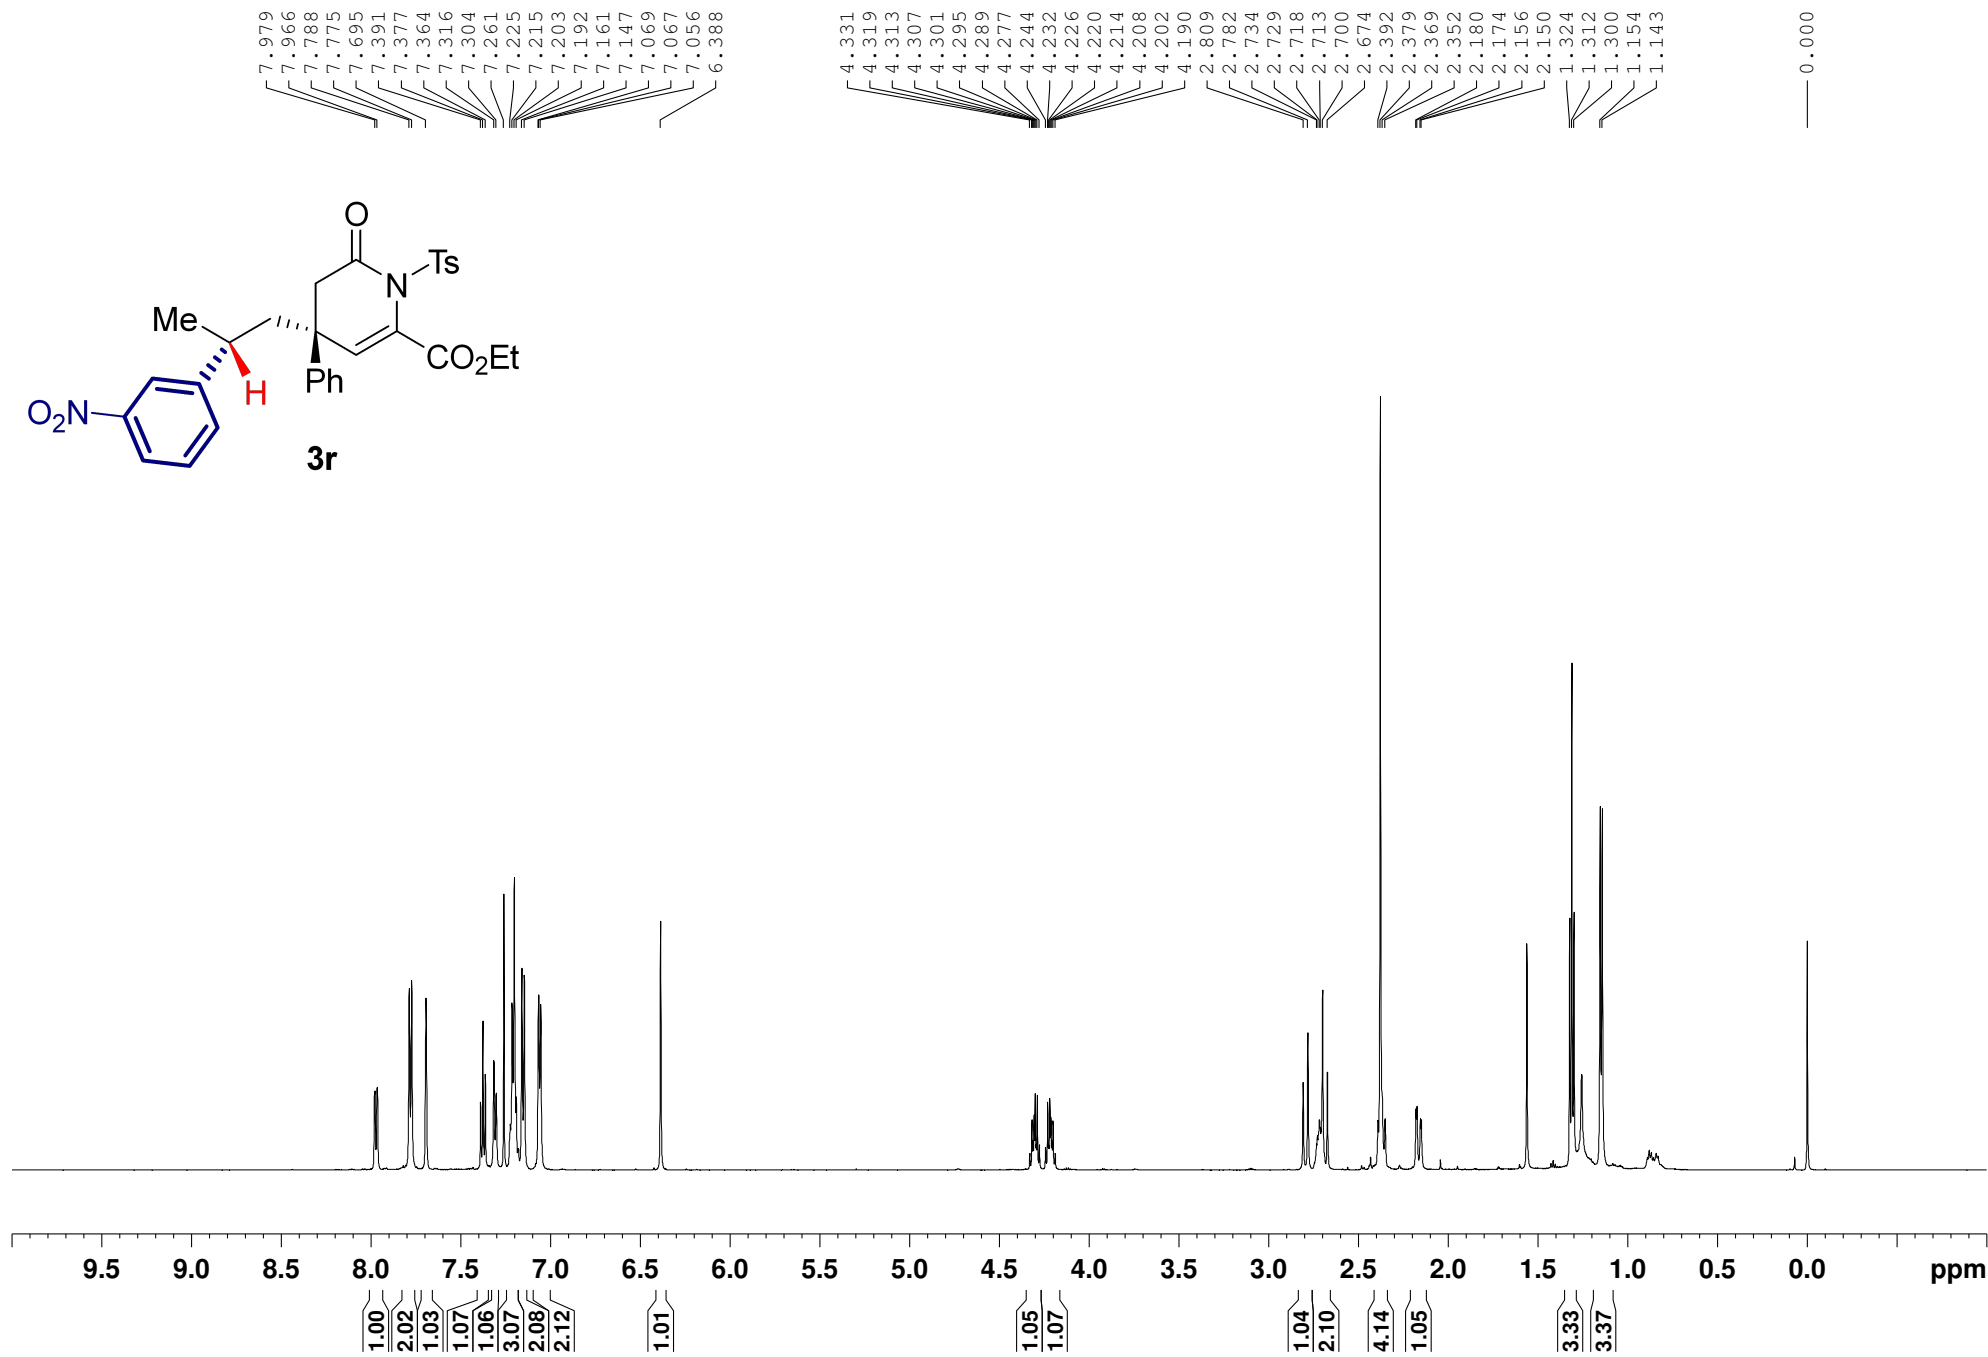

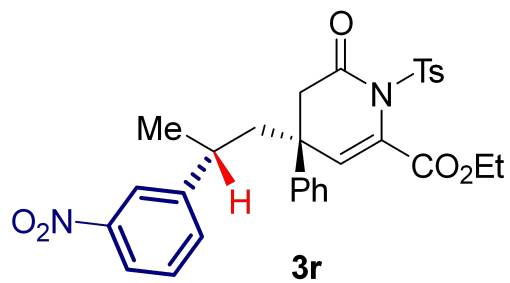

169.04  
162.82  
148.30  
148.13  
144.99  
141.28  
135.19  
133.36  
131.92  
131.52  
129.63  
129.40  
129.06  
129.04  
127.37  
126.01  
122.10  
121.44

77.21  
77.00  
76.79

62.07

48.01  
46.42  
42.45  
36.38

24.50  
21.63  
13.93

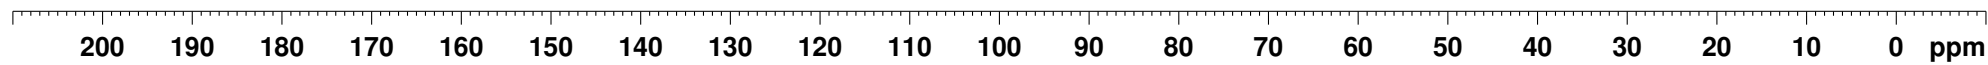



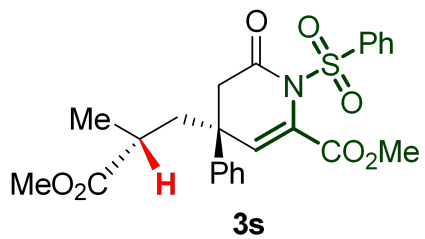

7.831  
7.818  
7.536  
7.524  
7.511  
7.356  
7.343  
7.330  
7.270  
7.264  
7.259  
7.250  
7.238  
7.236  
7.175  
7.173  
7.162  
6.813

3.928  
3.504  
2.945  
2.918  
2.666  
2.639  
2.382  
2.366  
2.359  
2.344  
2.335  
2.332  
2.324  
2.320  
2.309  
2.305  
1.693  
1.673  
1.671  
1.001  
0.990  
0.000

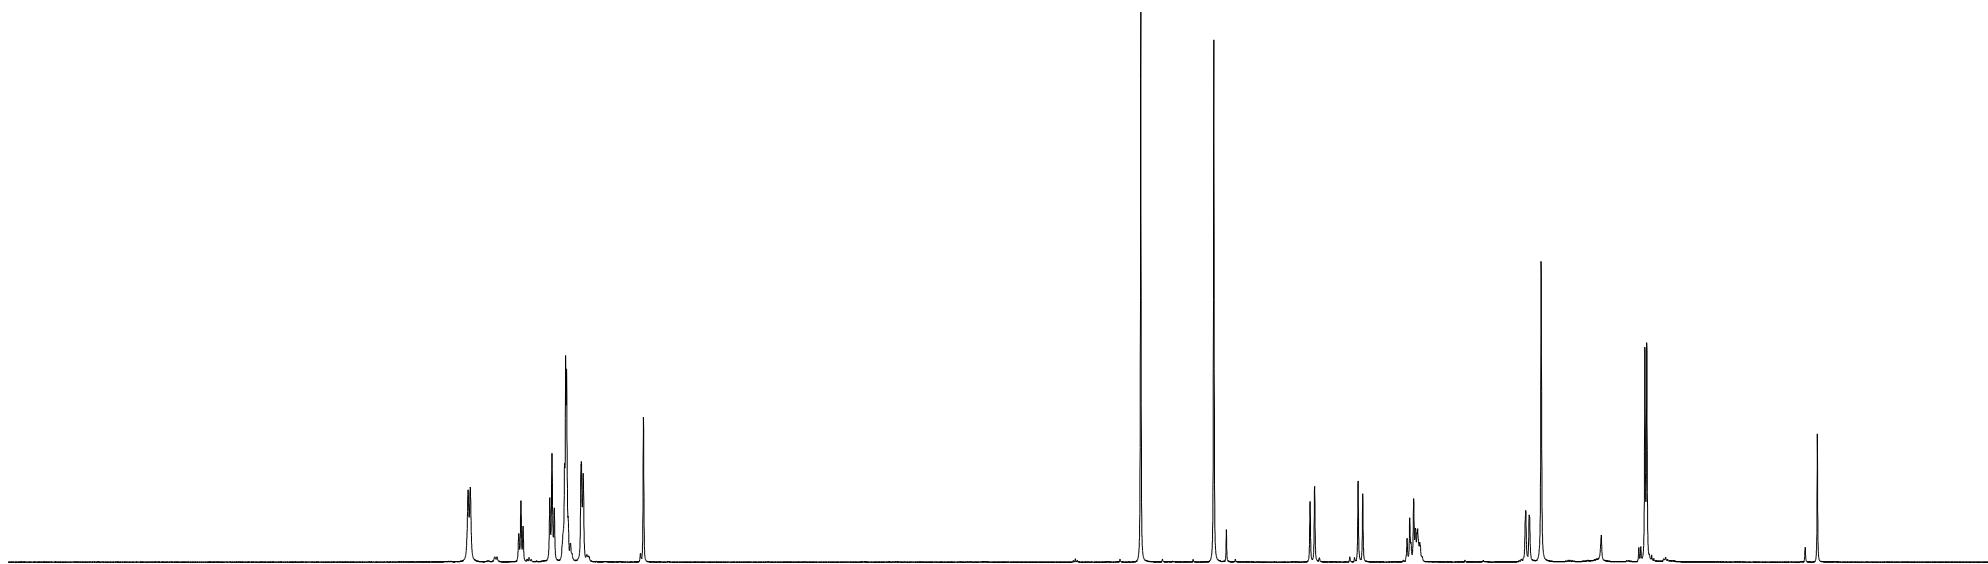

10.0 9.5 9.0 8.5 8.0 7.5 7.0 6.5 6.0 5.5 5.0 4.5 4.0 3.5 3.0 2.5 2.0 1.5 1.0 0.5 0.0 ppm

1.93  
1.04  
2.02  
3.60  
2.01  
1.00  
3.21  
3.00  
1.04  
1.00  
2.18  
1.13  
3.10

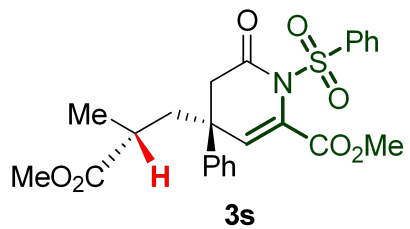

— 176.22  
— 168.68  
— 163.48

— 141.05  
— 138.07  
— 133.76  
— 132.03  
— 129.31  
— 129.03  
— 128.37  
— 127.68  
— 126.29

— 77.21  
— 77.00  
— 76.79

— 52.87  
— 51.86  
— 45.00  
— 44.65  
— 42.30  
— 35.82

— 19.55

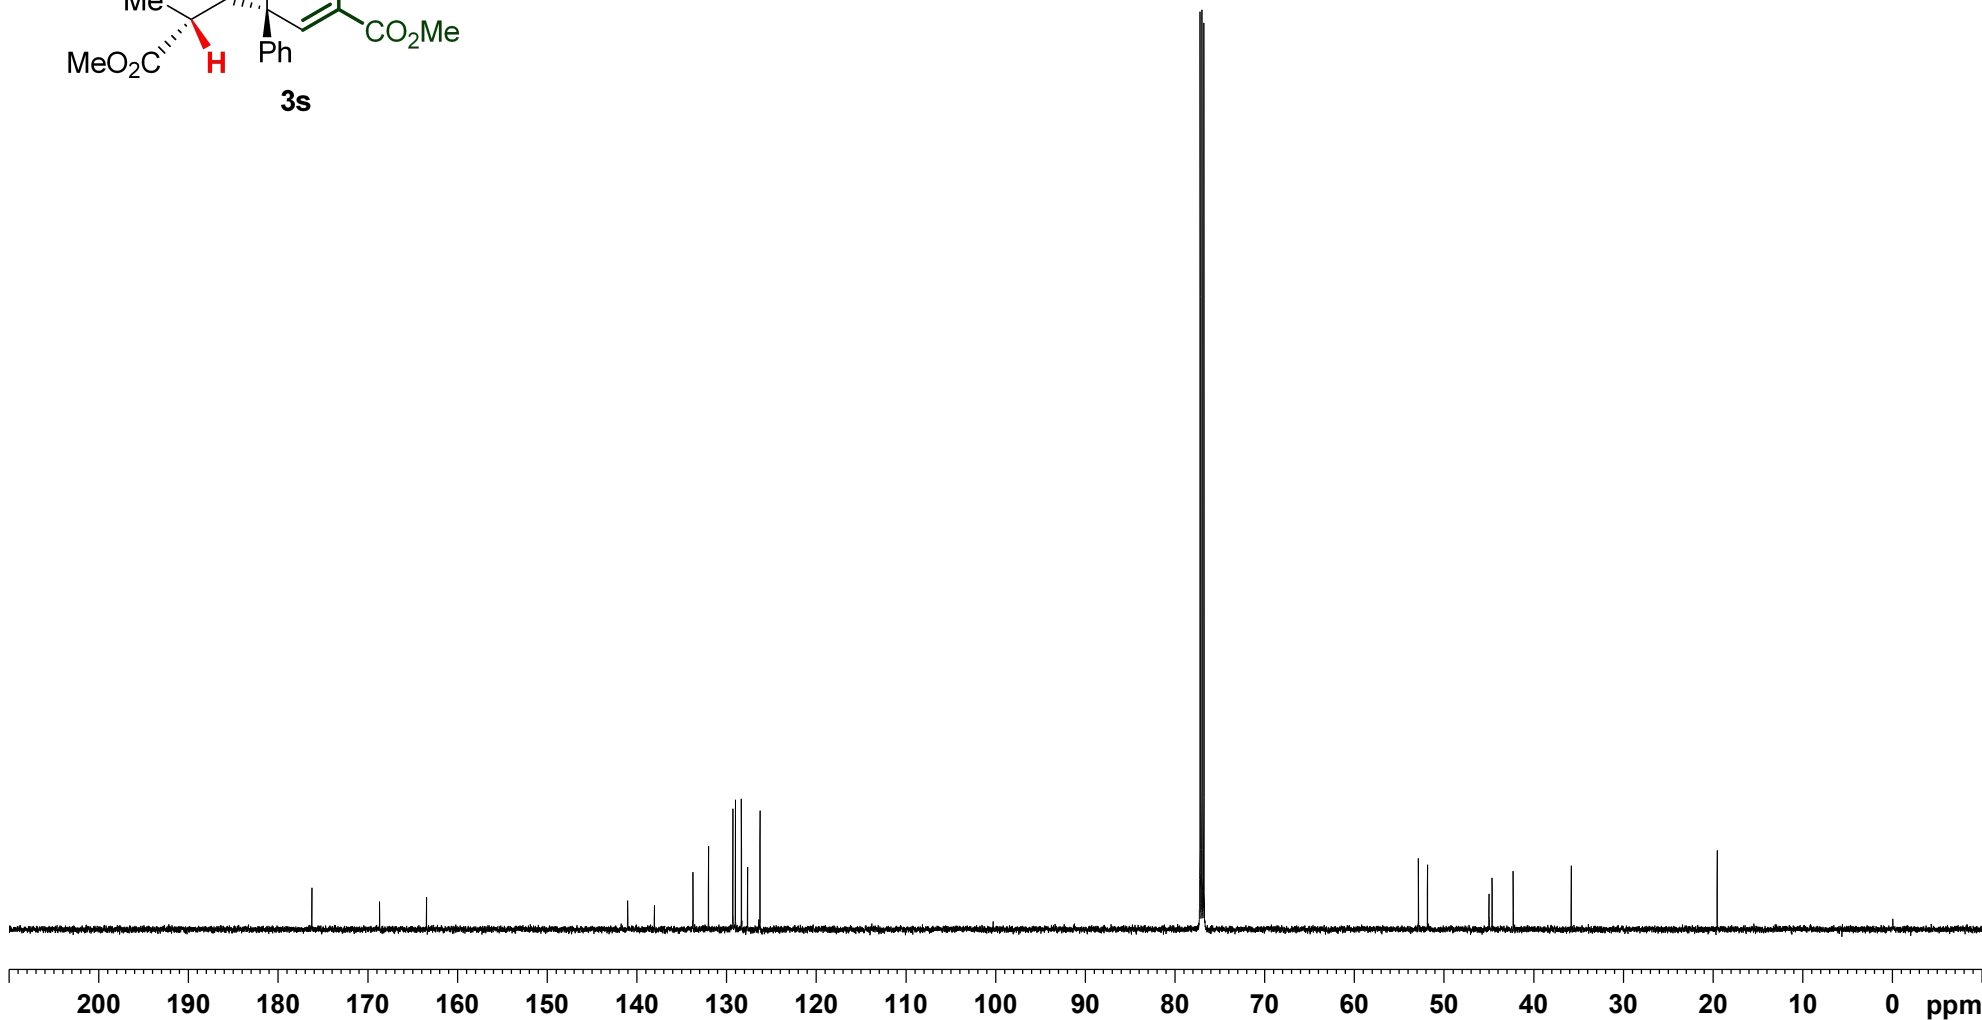

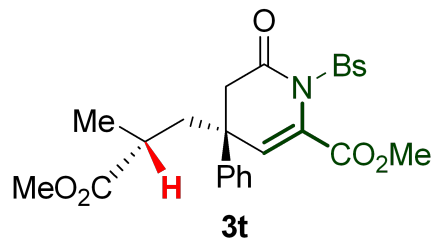

7.628  
7.616  
7.431  
7.418  
7.295  
7.293  
7.283  
7.278  
7.272  
7.266  
7.253  
7.242  
7.131  
7.119  
6.836

3.922  
3.487  
2.975  
2.948  
2.645  
2.618  
2.398  
2.383  
2.376  
2.361  
2.339  
2.335  
2.324  
2.320  
2.308  
2.305  
2.297  
2.293  
2.281  
2.277  
1.694  
1.674  
1.017  
1.006

0.000

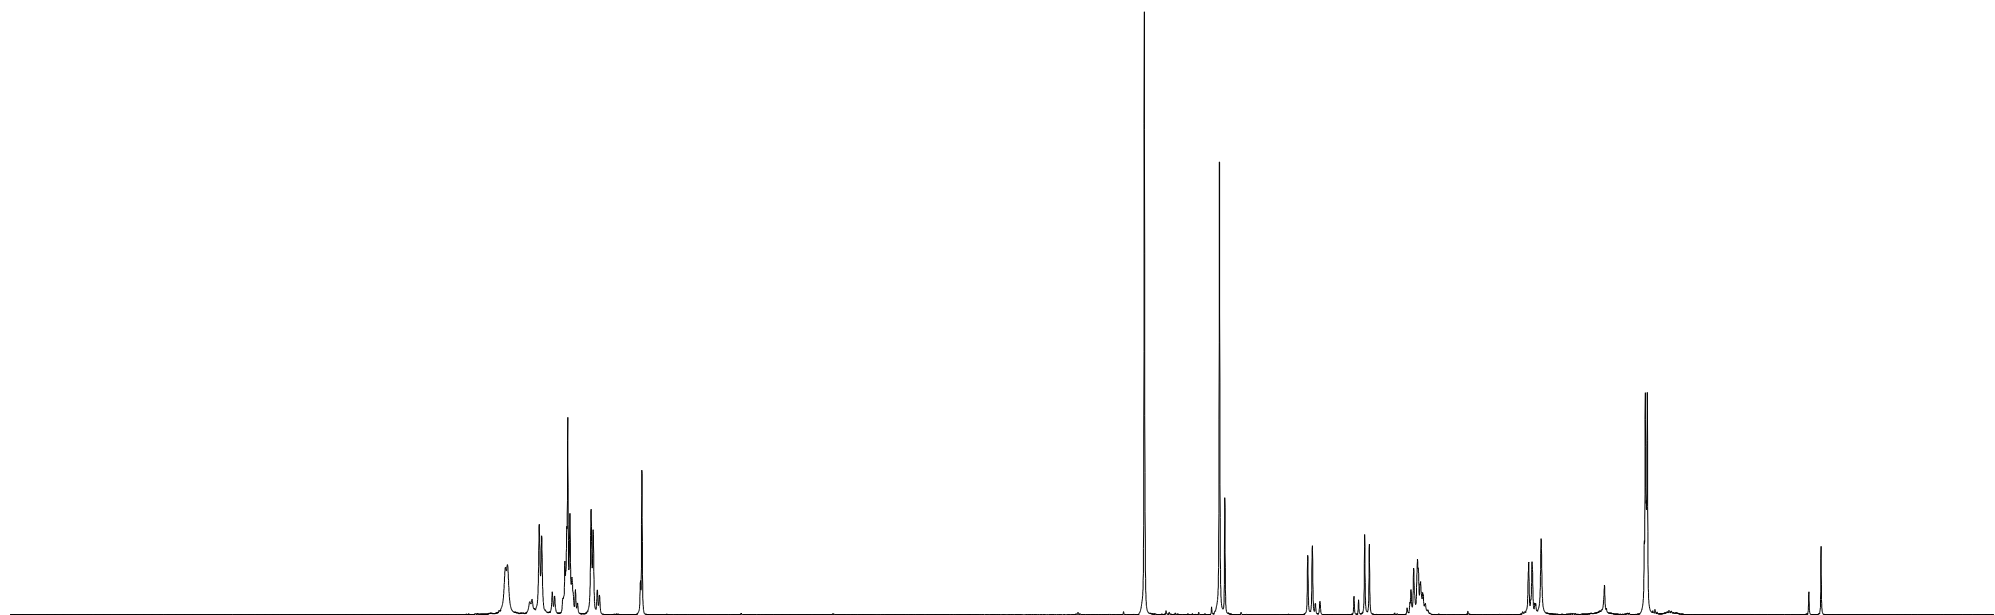

10.0 9.5 9.0 8.5 8.0 7.5 7.0 6.5 6.0 5.5 5.0 4.5 4.0 3.5 3.0 2.5 2.0 1.5 1.0 0.5 0.0 ppm

1.95  
2.04  
3.82  
2.01  
1.19

3.63  
3.02  
1.00  
1.02  
2.50  
1.11  
3.70

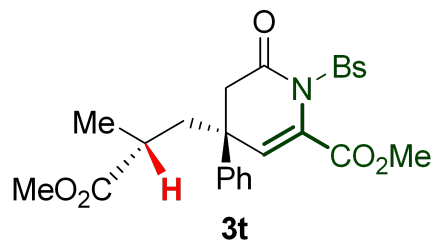

— 176.16  
— 168.73  
— 163.34

141.01  
136.73  
132.66  
131.87  
131.63  
130.72  
130.47  
129.01  
127.69  
126.30

77.21  
77.00  
76.79

52.92  
51.86  
44.92  
42.34  
35.76

— 19.60

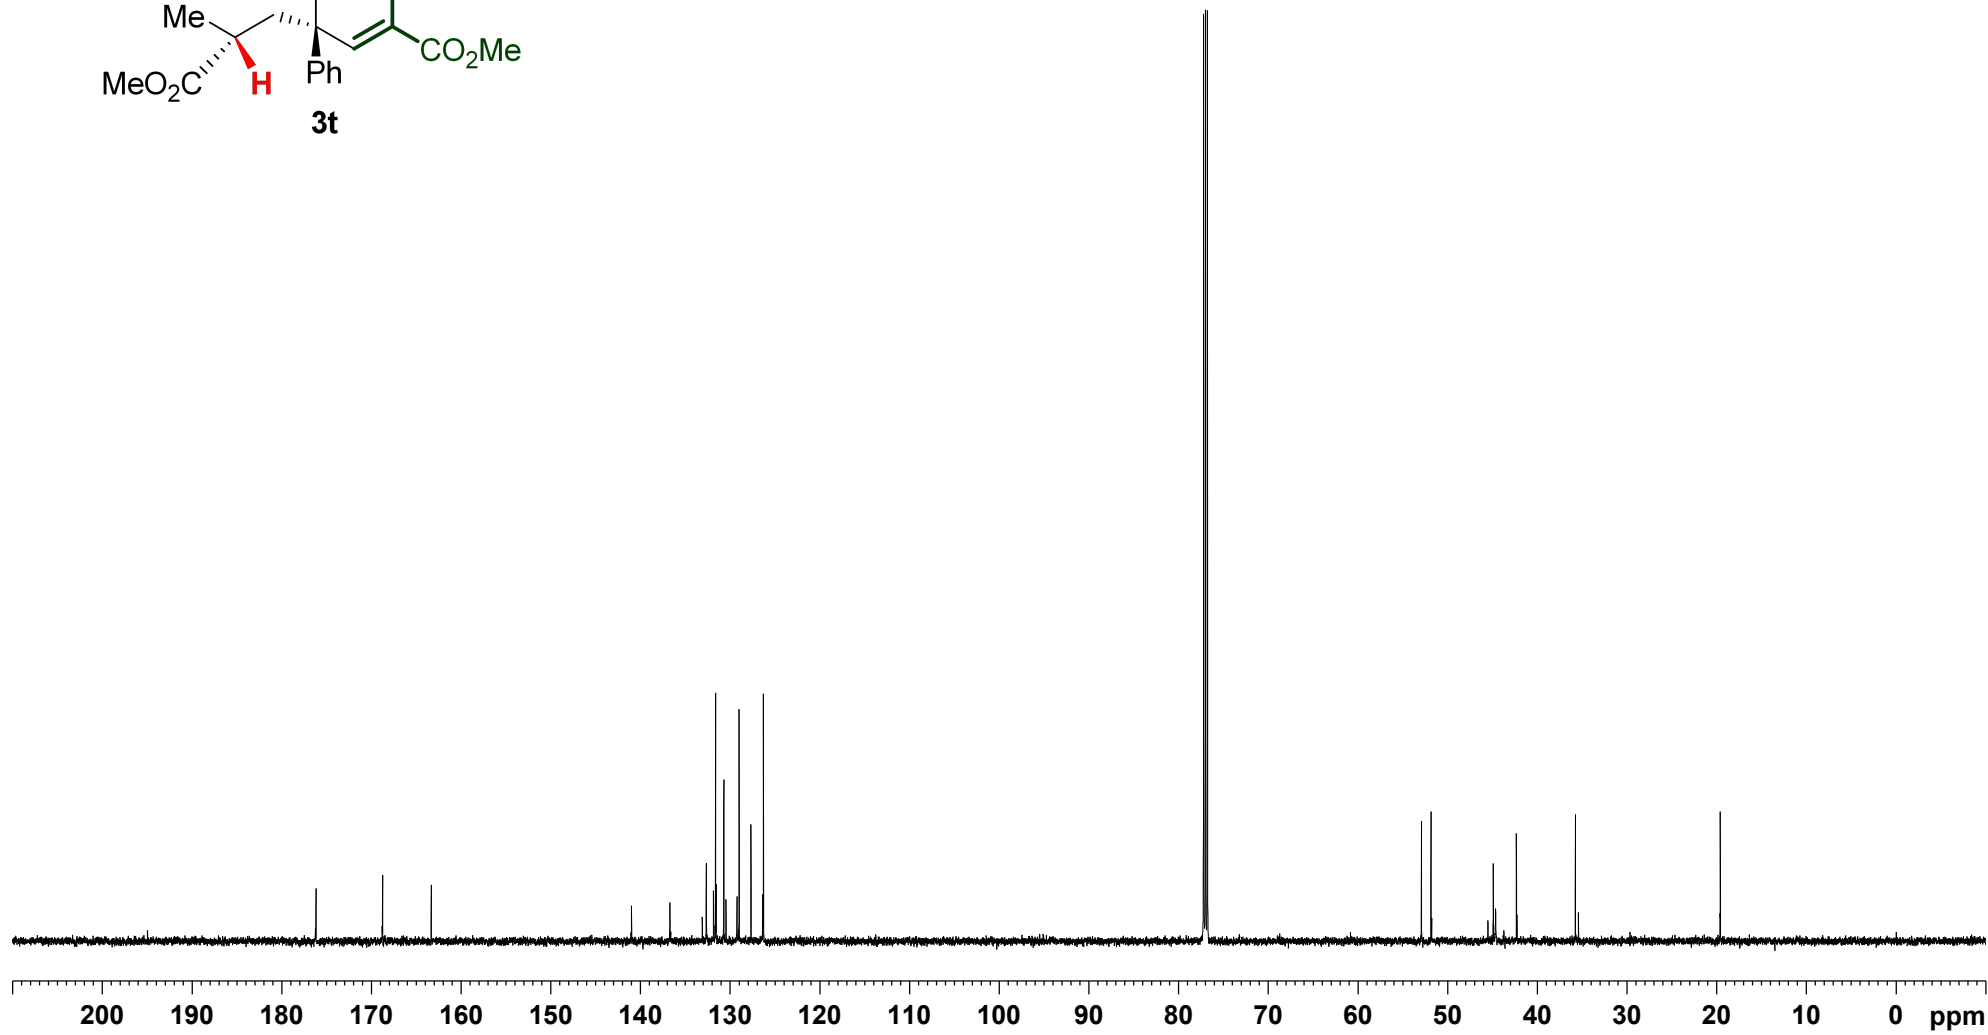

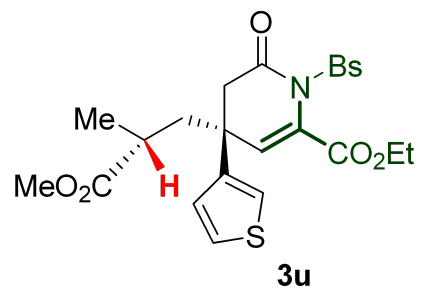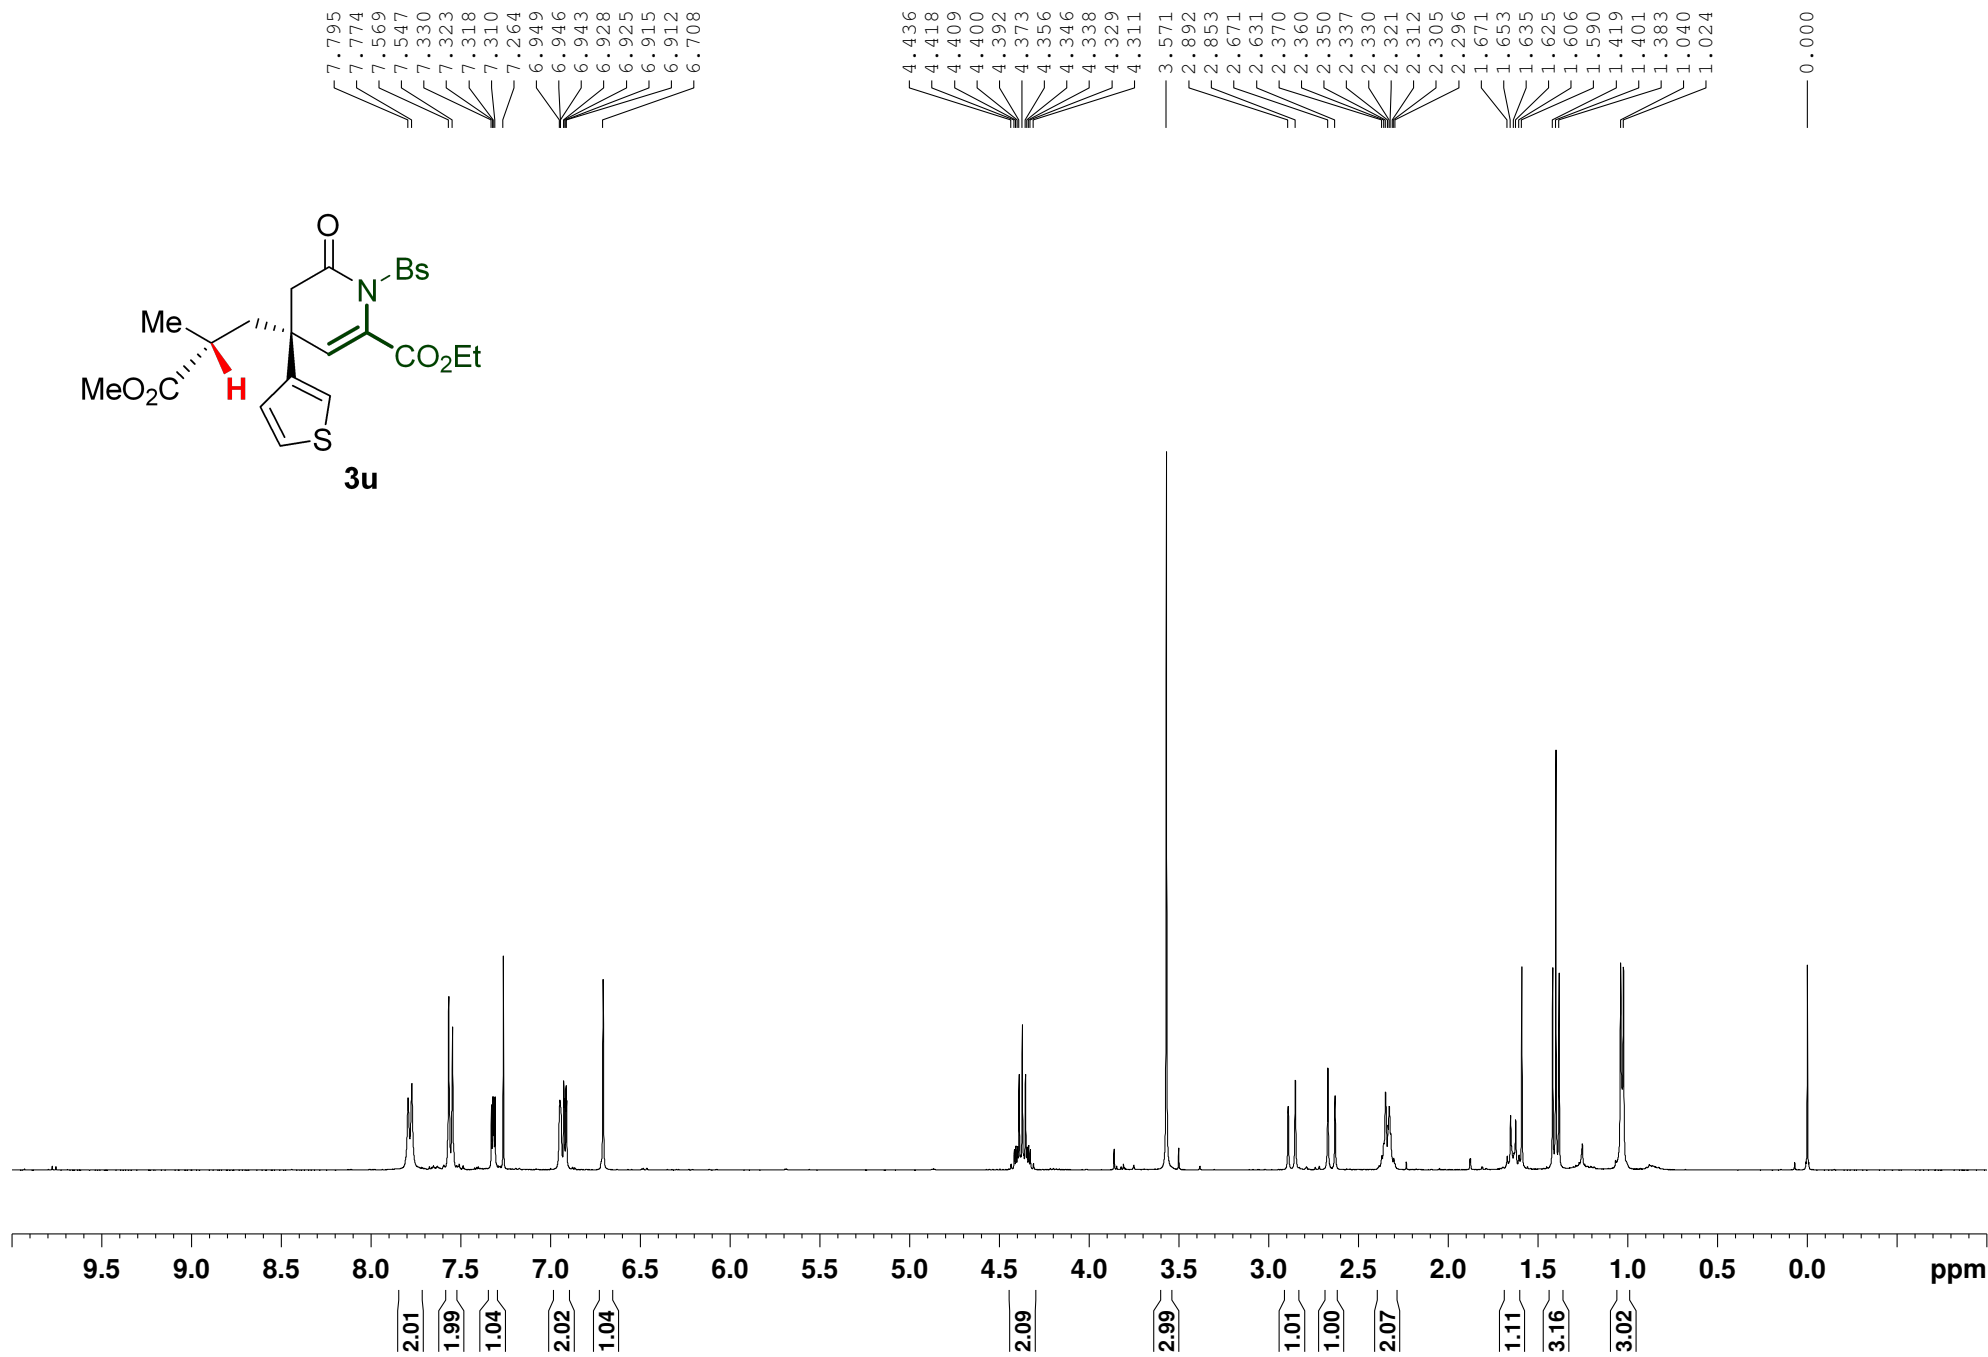

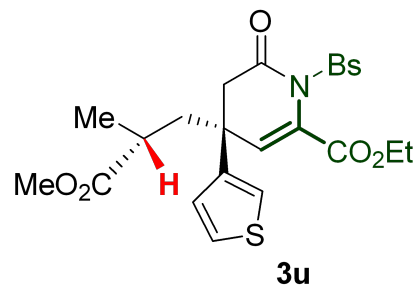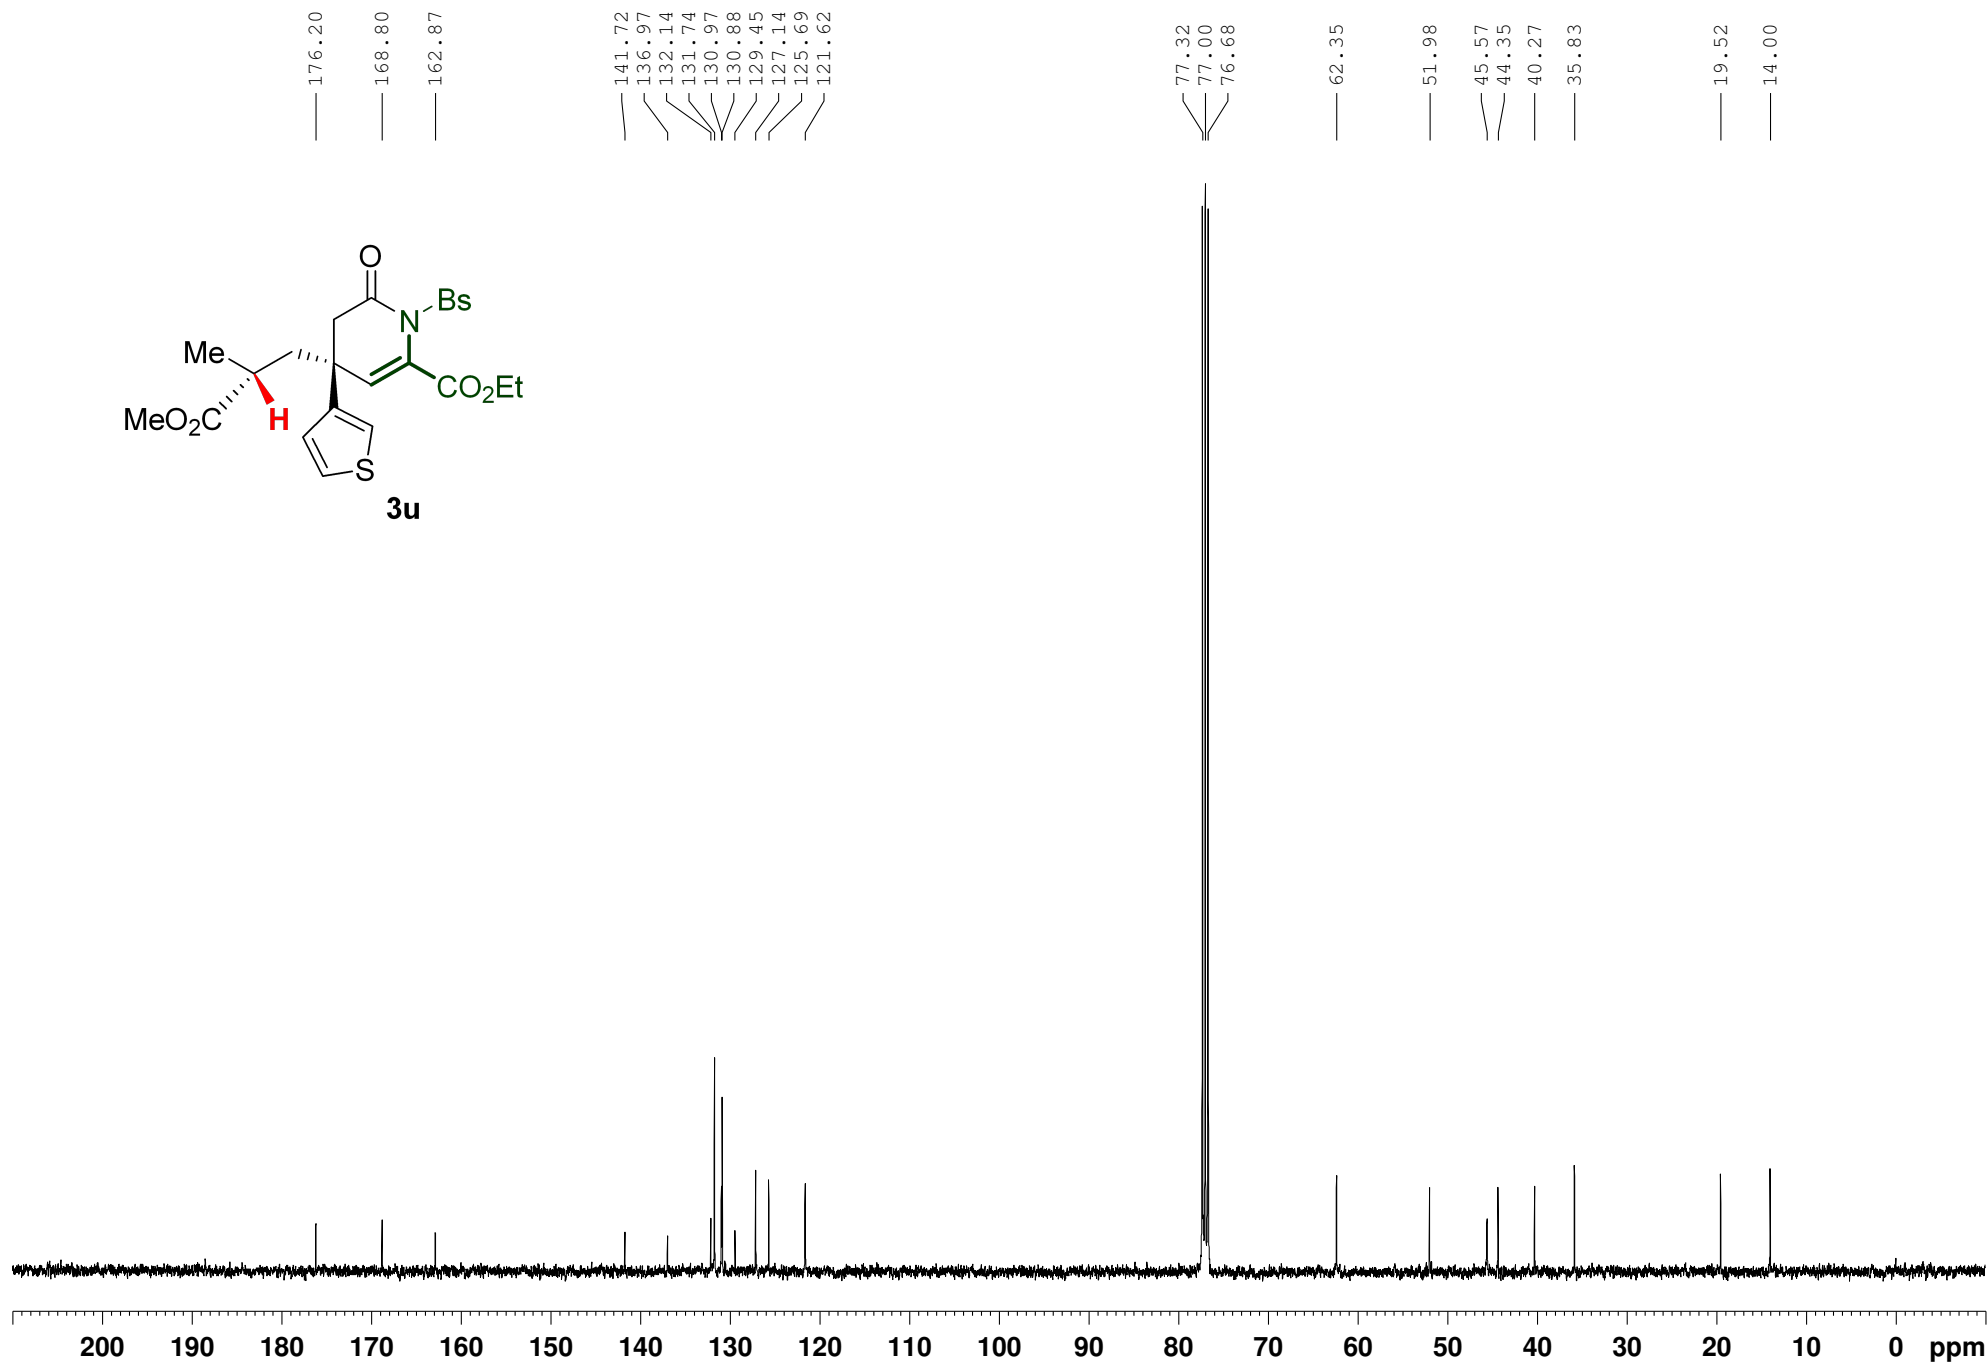

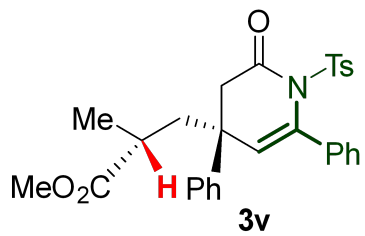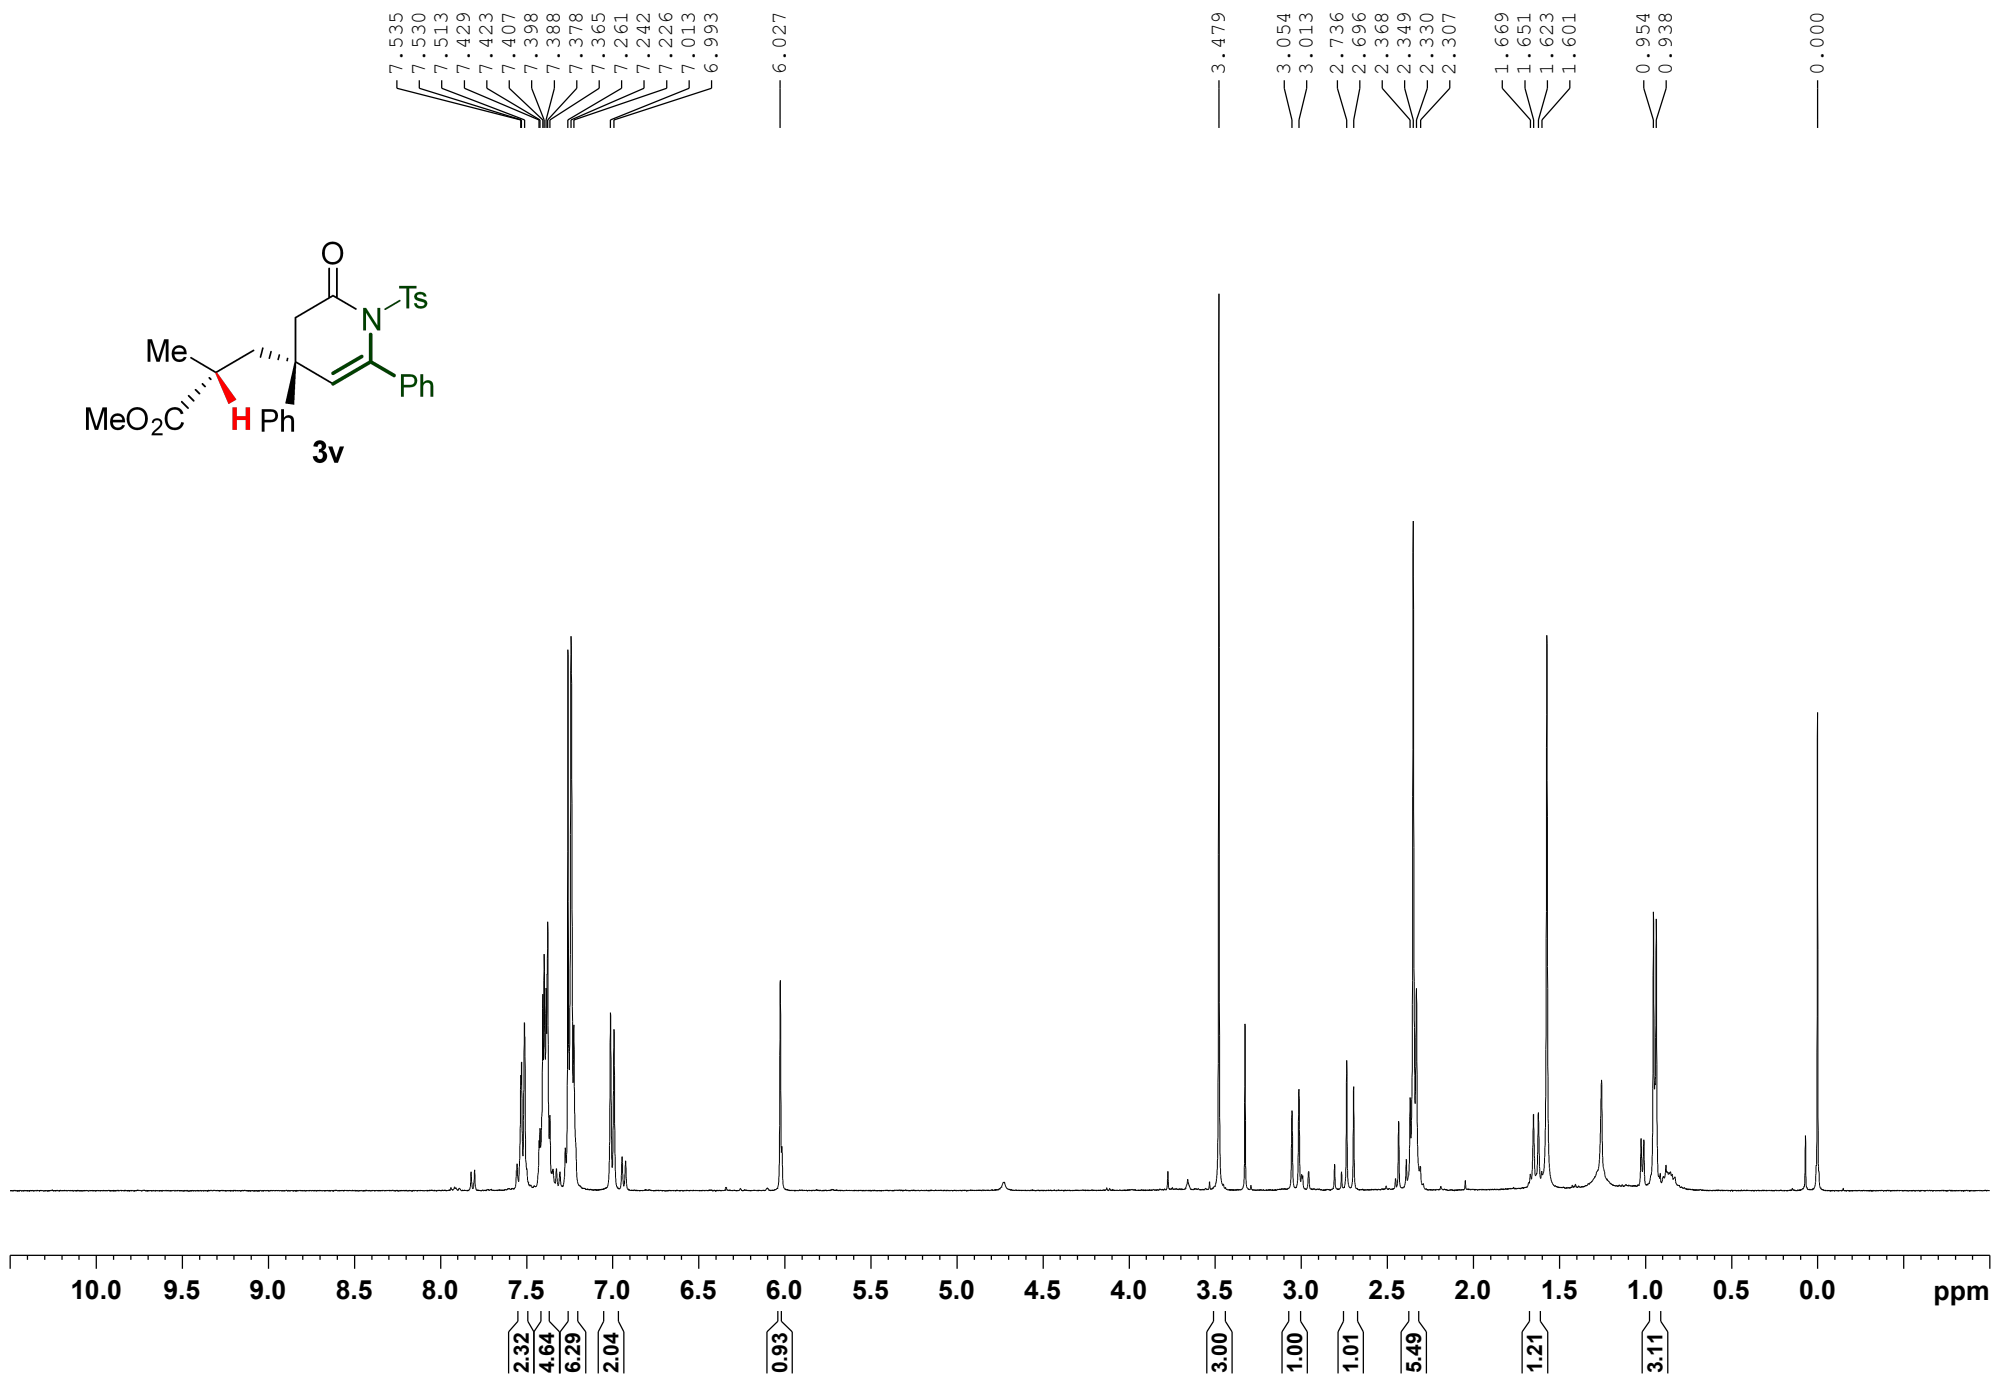

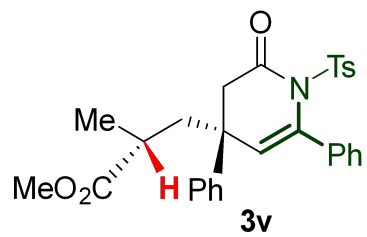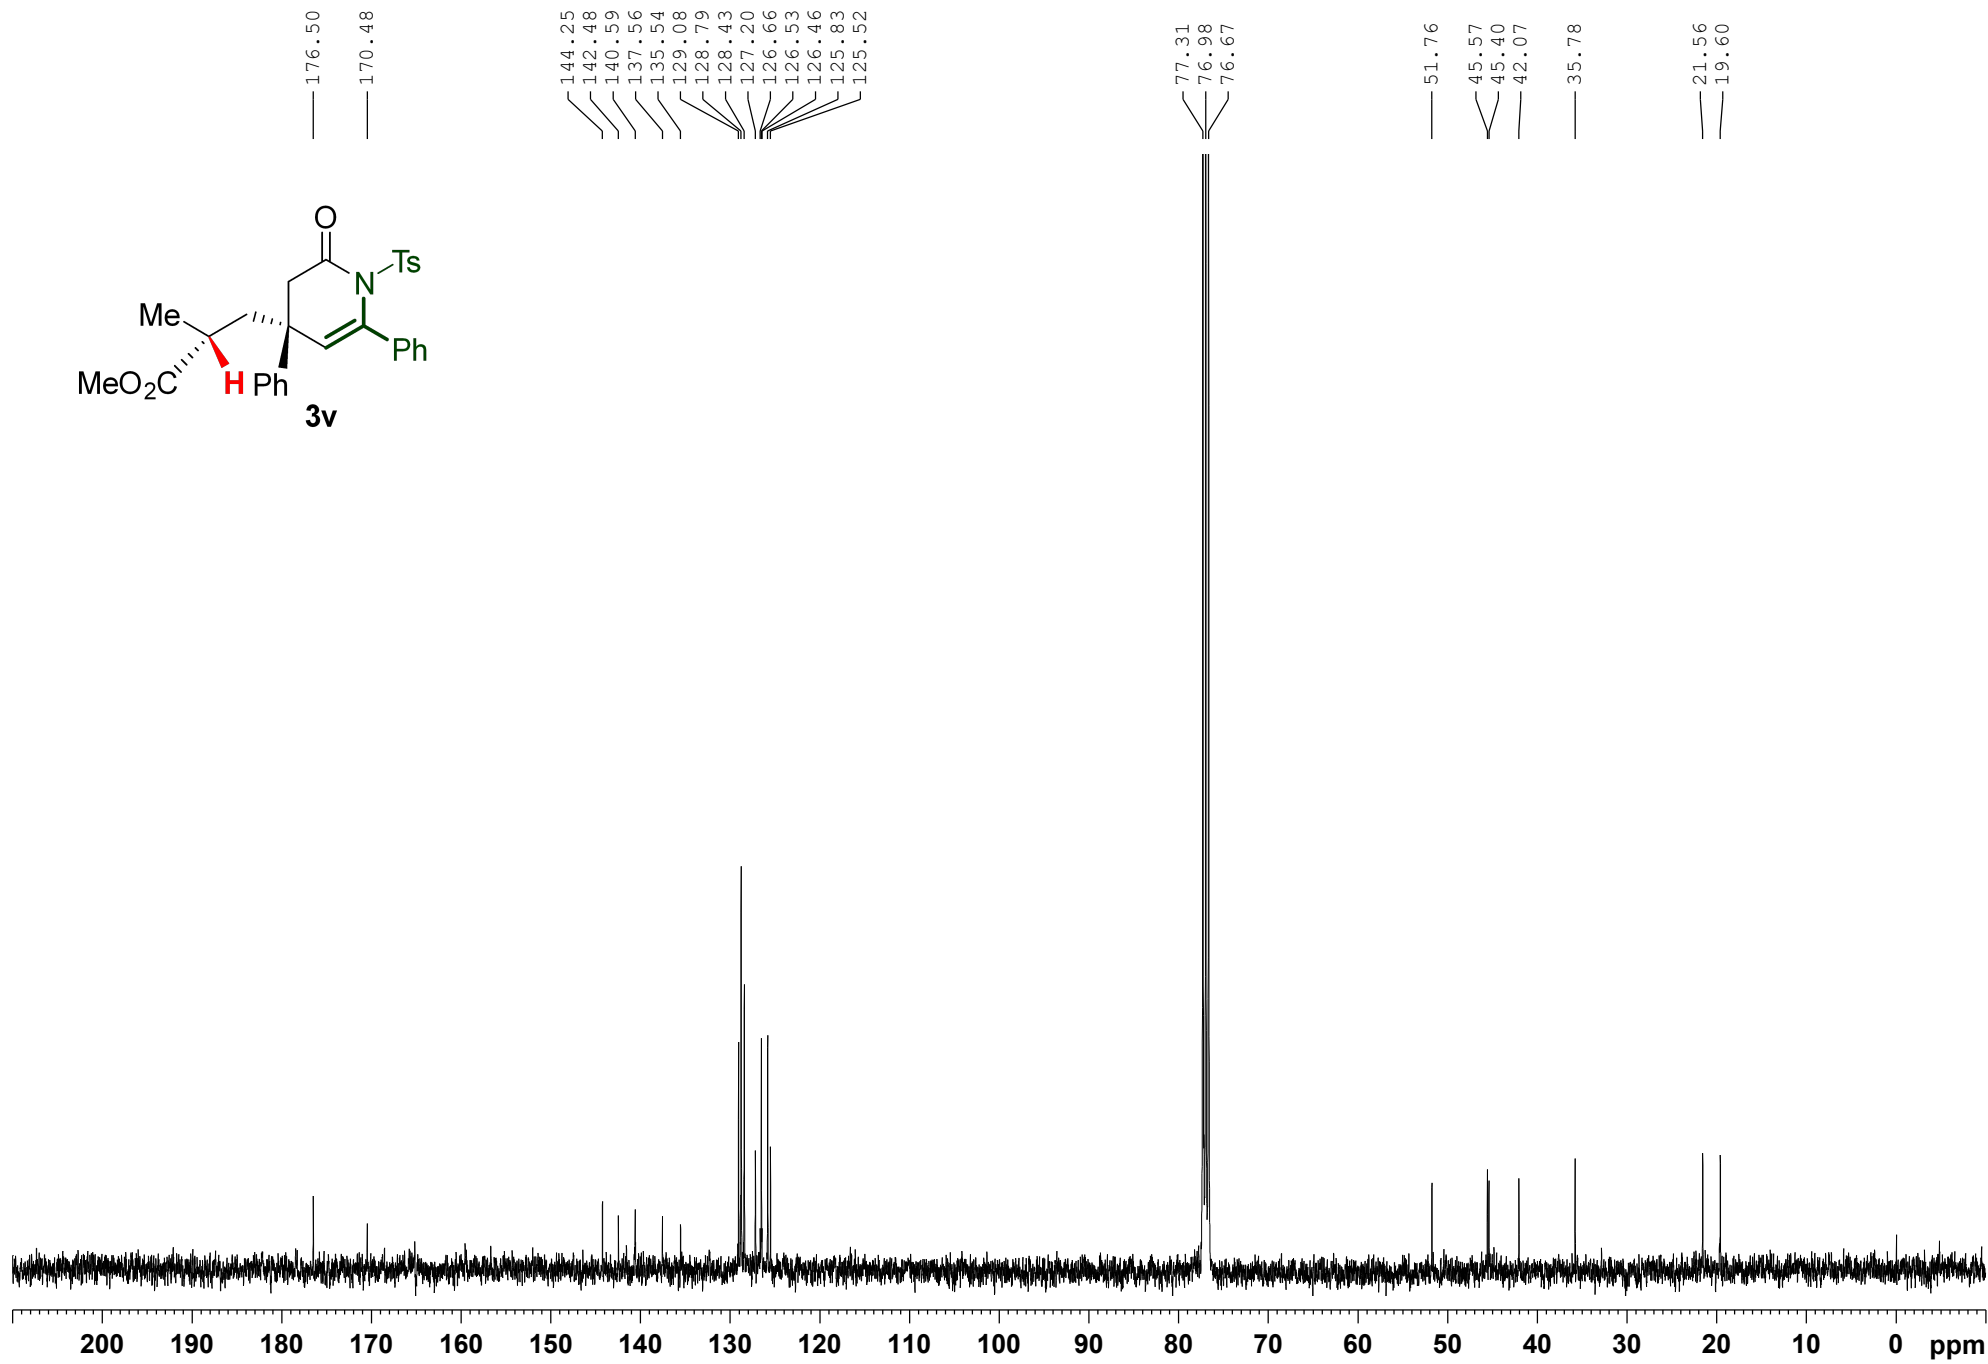



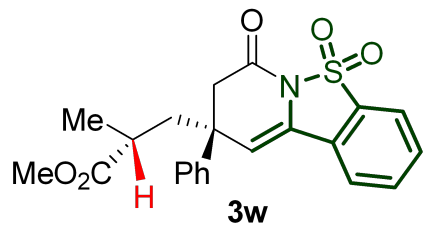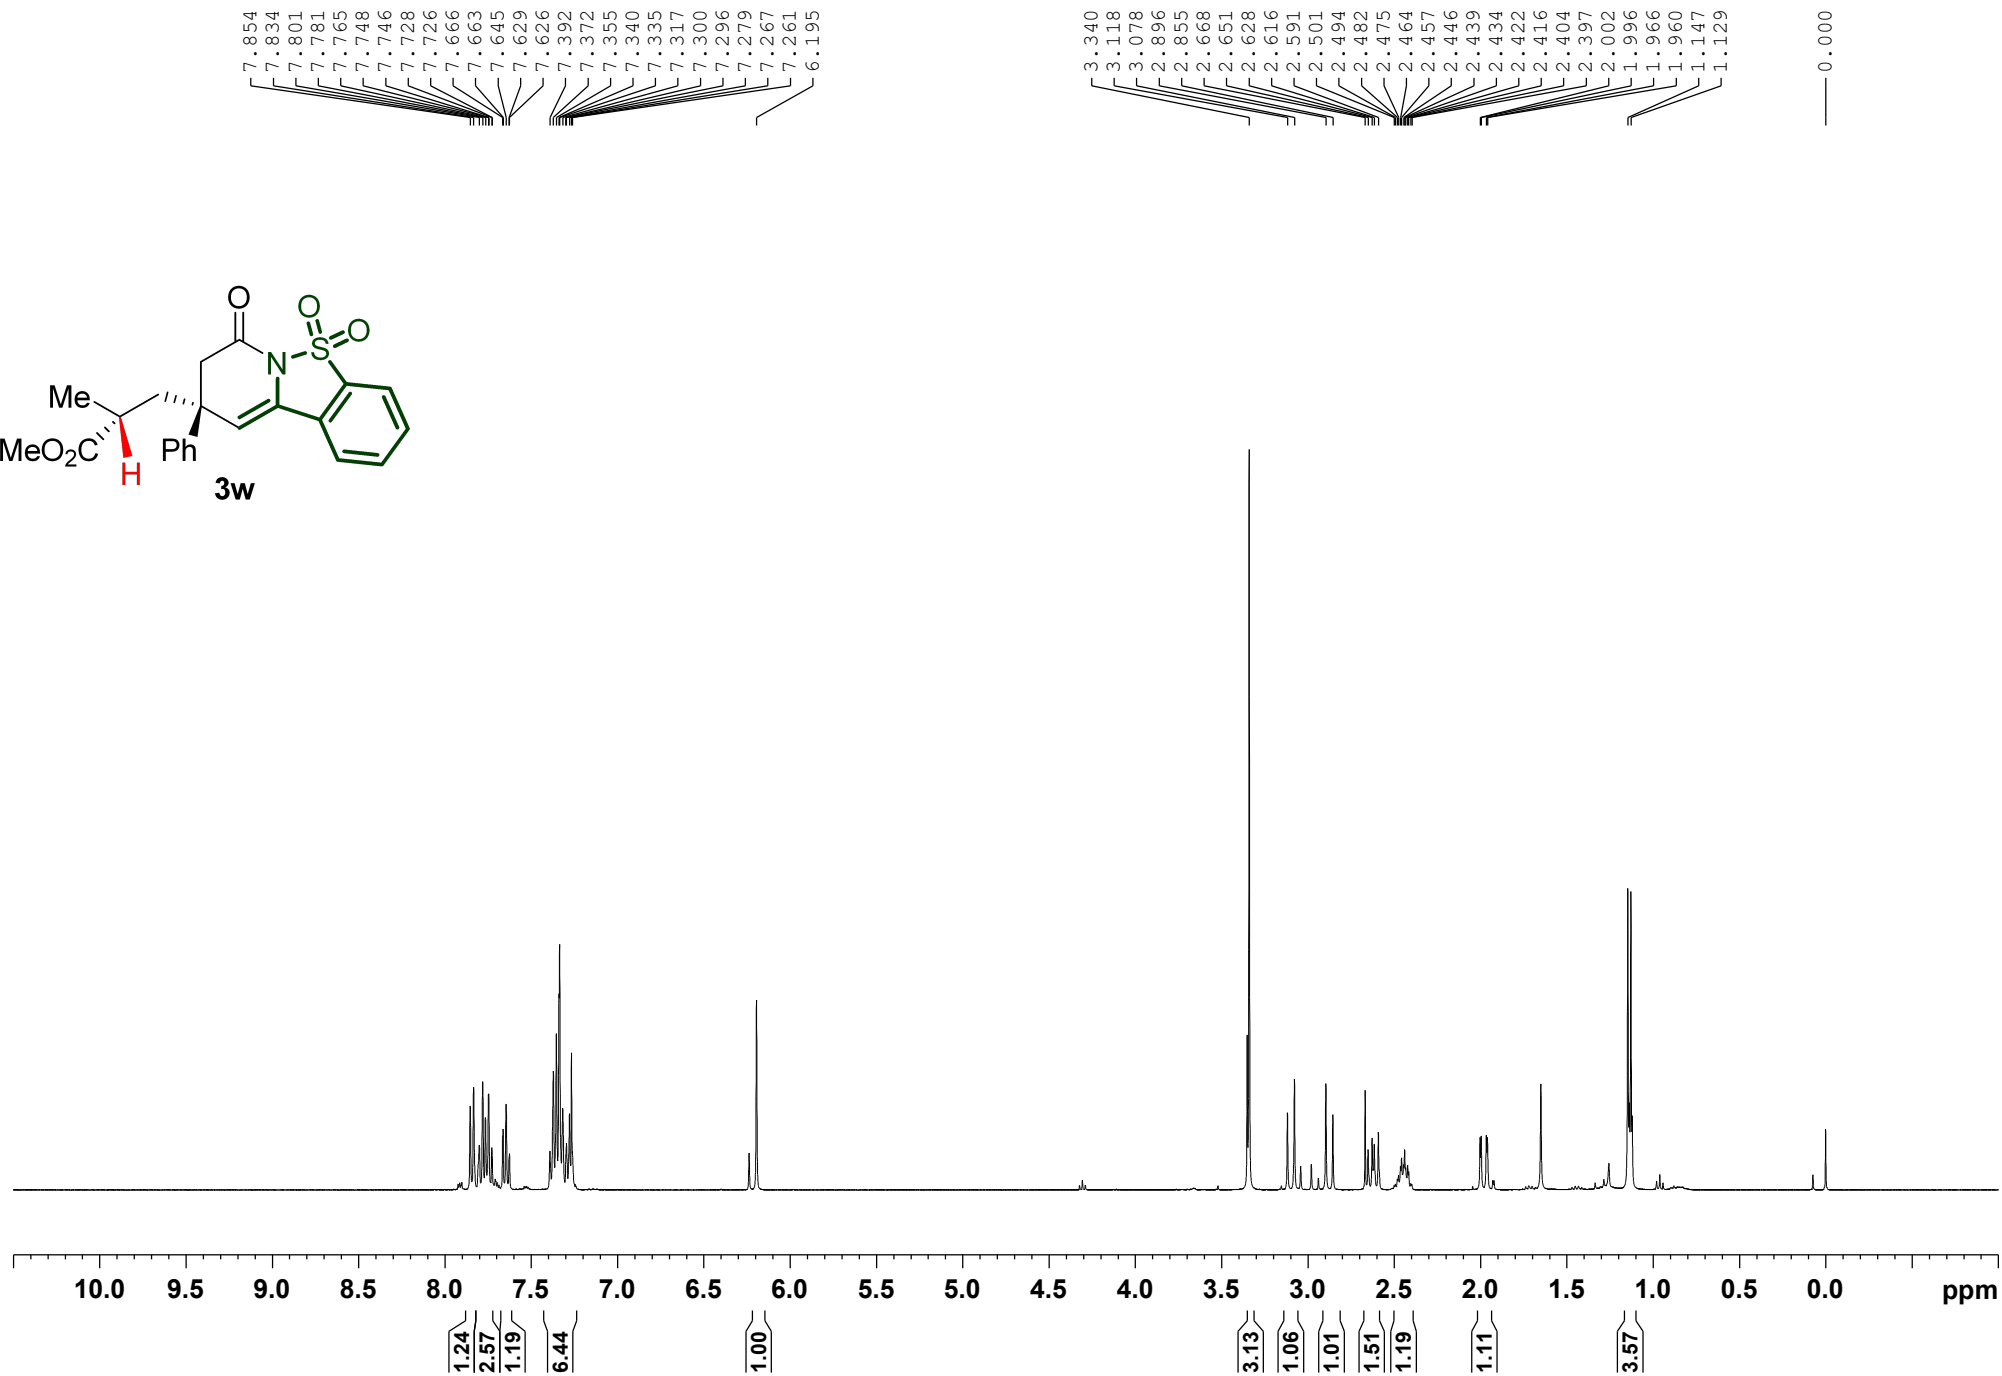

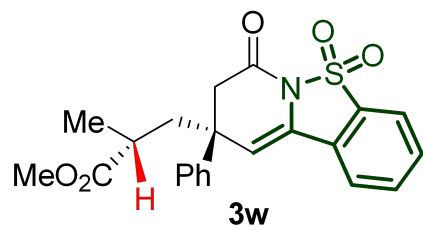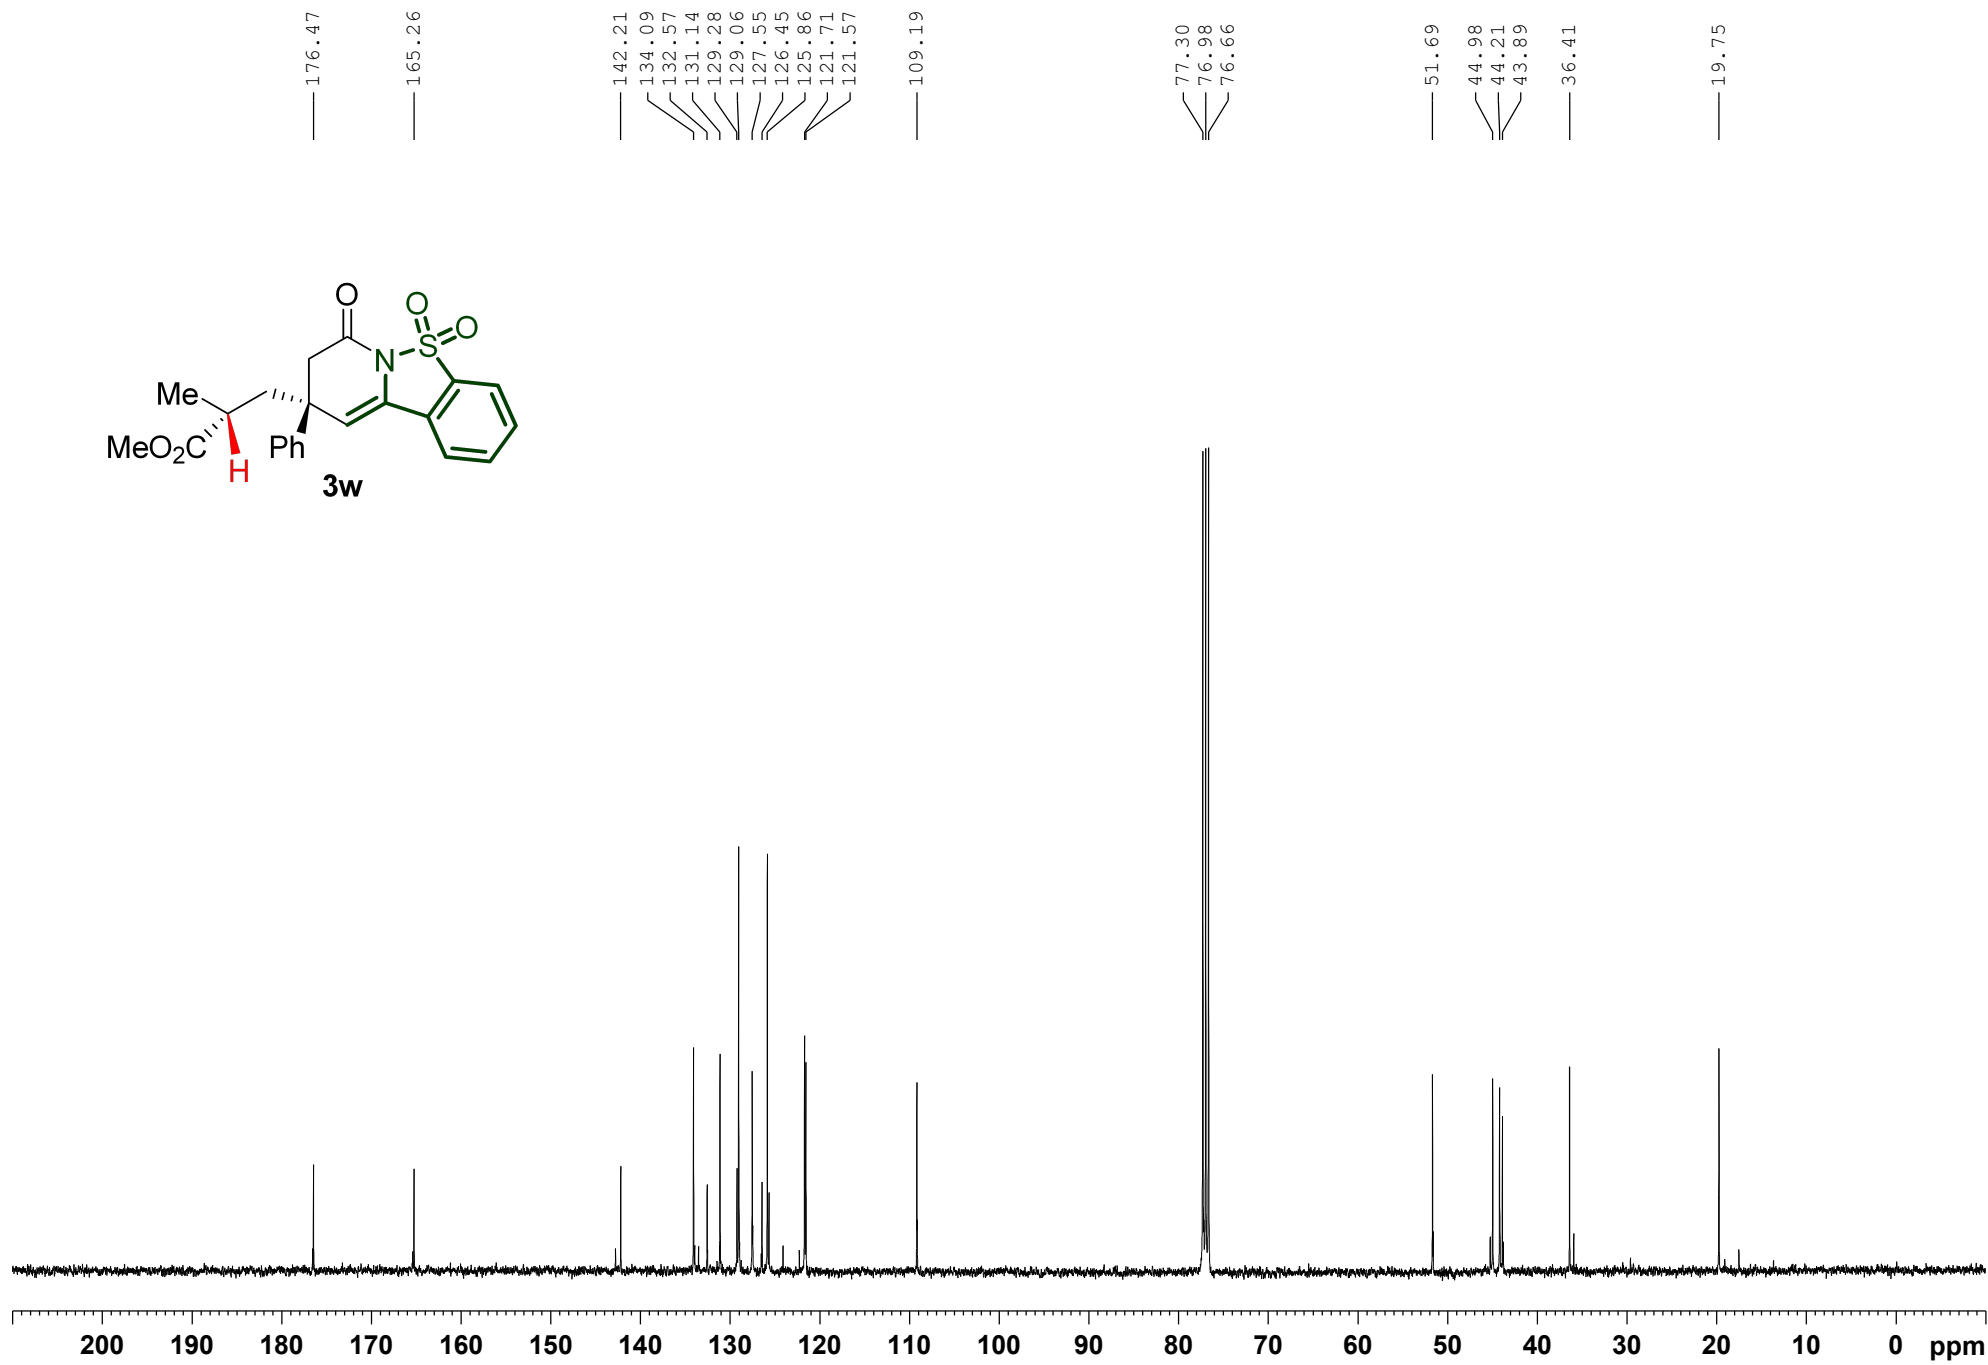

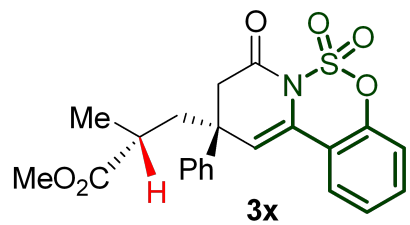

7.646  
7.643  
7.627  
7.623  
7.494  
7.490  
7.474  
7.471  
7.454  
7.451  
7.402  
7.383  
7.365  
7.347  
7.336  
7.316  
7.295  
7.277  
7.264  
7.226  
7.206  
6.213

3.393  
3.119  
3.079  
2.893  
2.853  
2.619  
2.595  
2.583  
2.559  
2.472  
2.464  
2.454  
2.447  
2.436  
2.430  
2.419  
2.413  
2.406  
2.395  
2.389  
2.378  
2.370  
1.963  
1.957  
1.927  
1.921  
1.136  
1.118

0.000

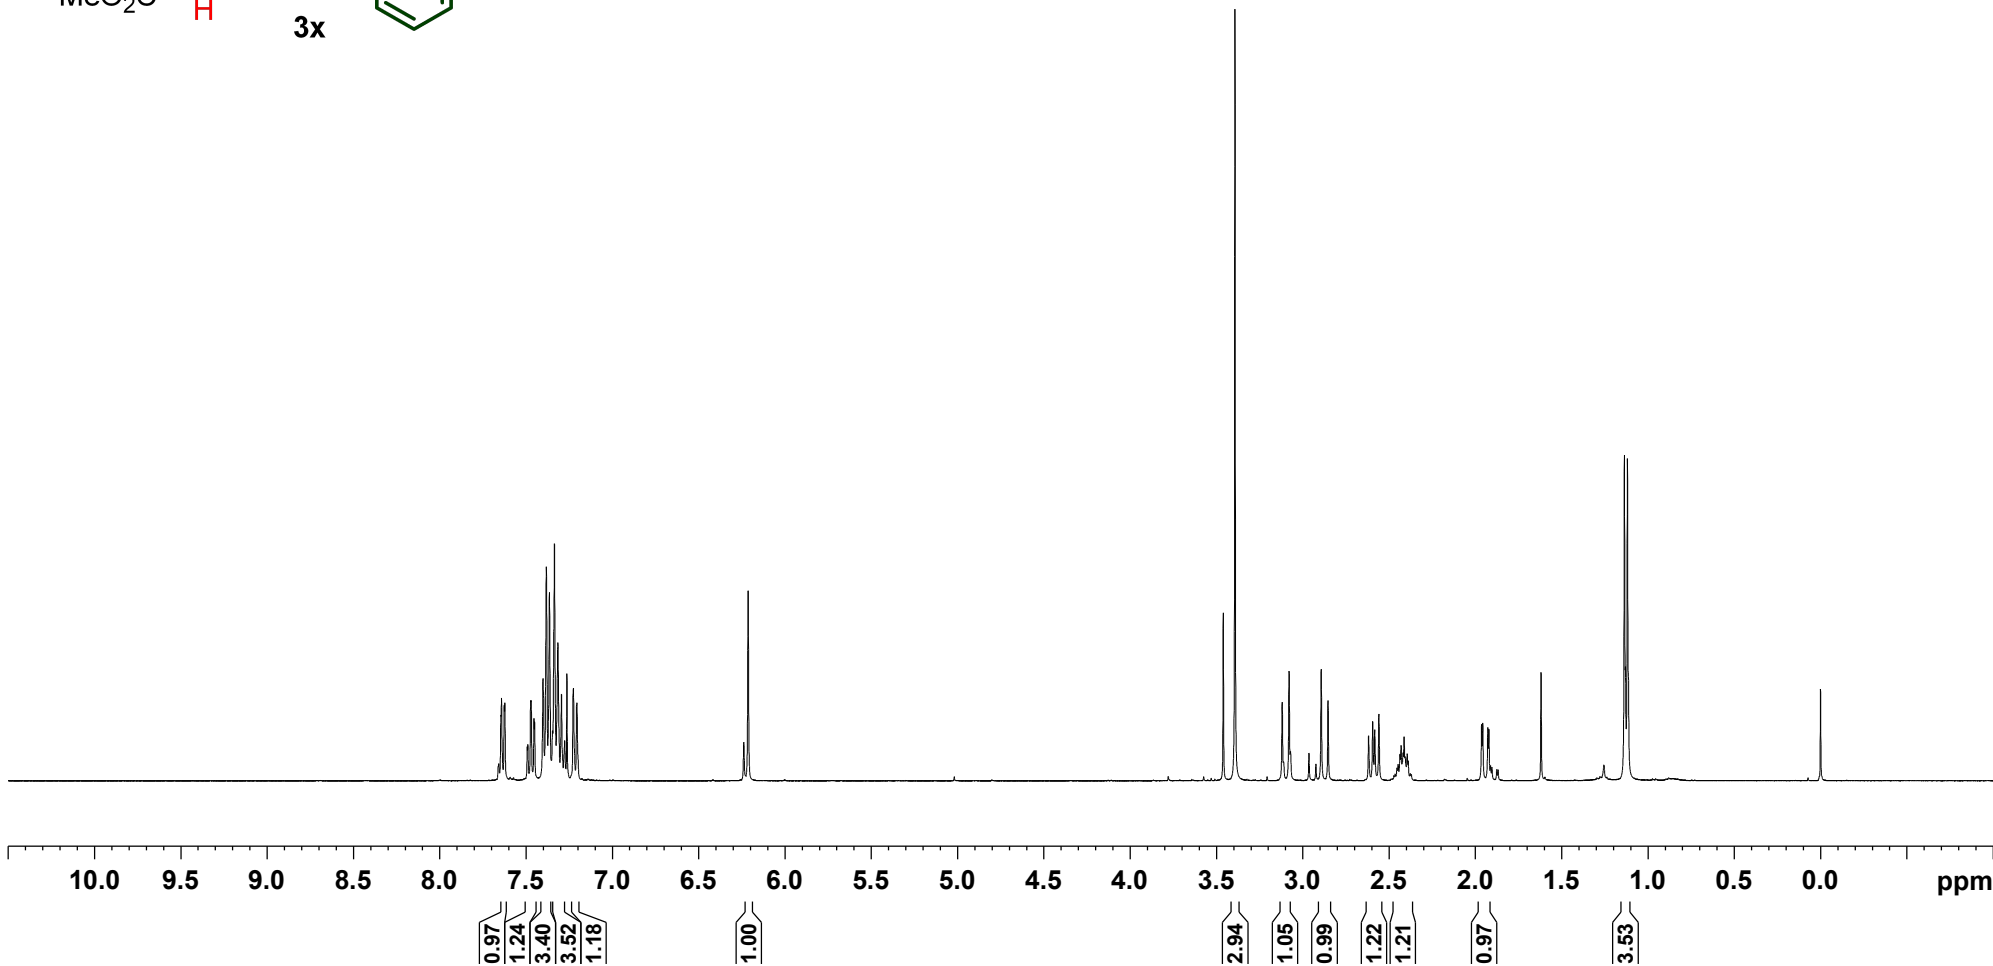

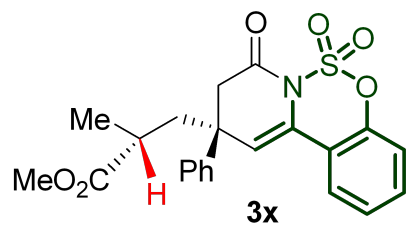

— 176.56  
 — 166.59  
 — 147.28  
 — 141.37  
 132.37  
 131.54  
 129.09  
 127.69  
 127.57  
 125.99  
 125.54  
 120.04  
 119.43  
 114.91

77.34  
 77.01  
 76.69

— 51.79  
 44.99  
 43.80  
 42.26  
 — 36.29

— 19.74

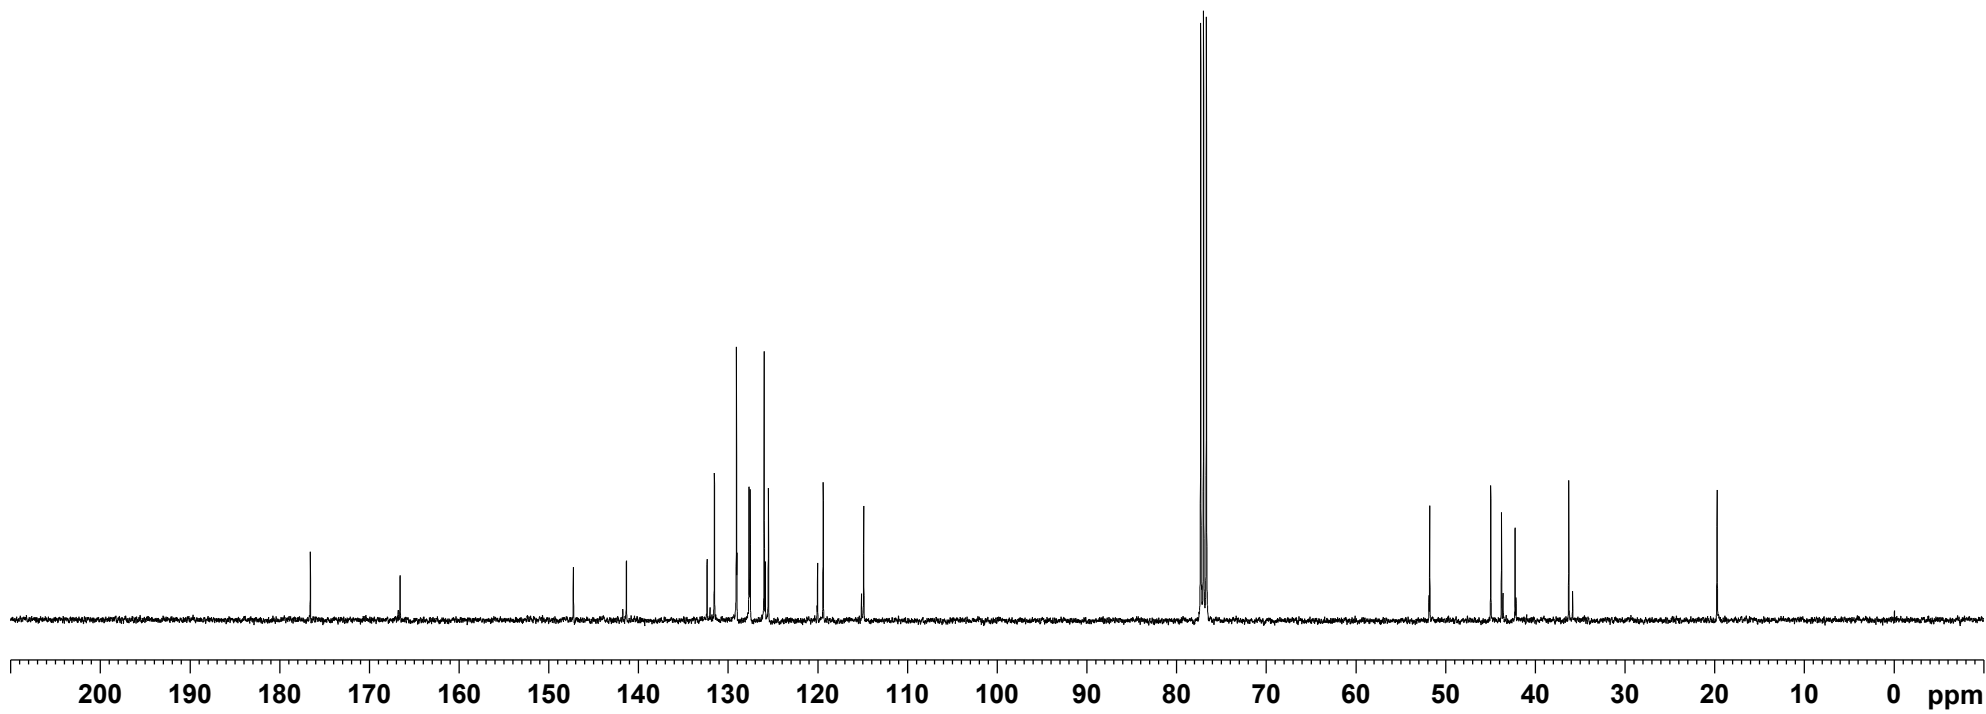

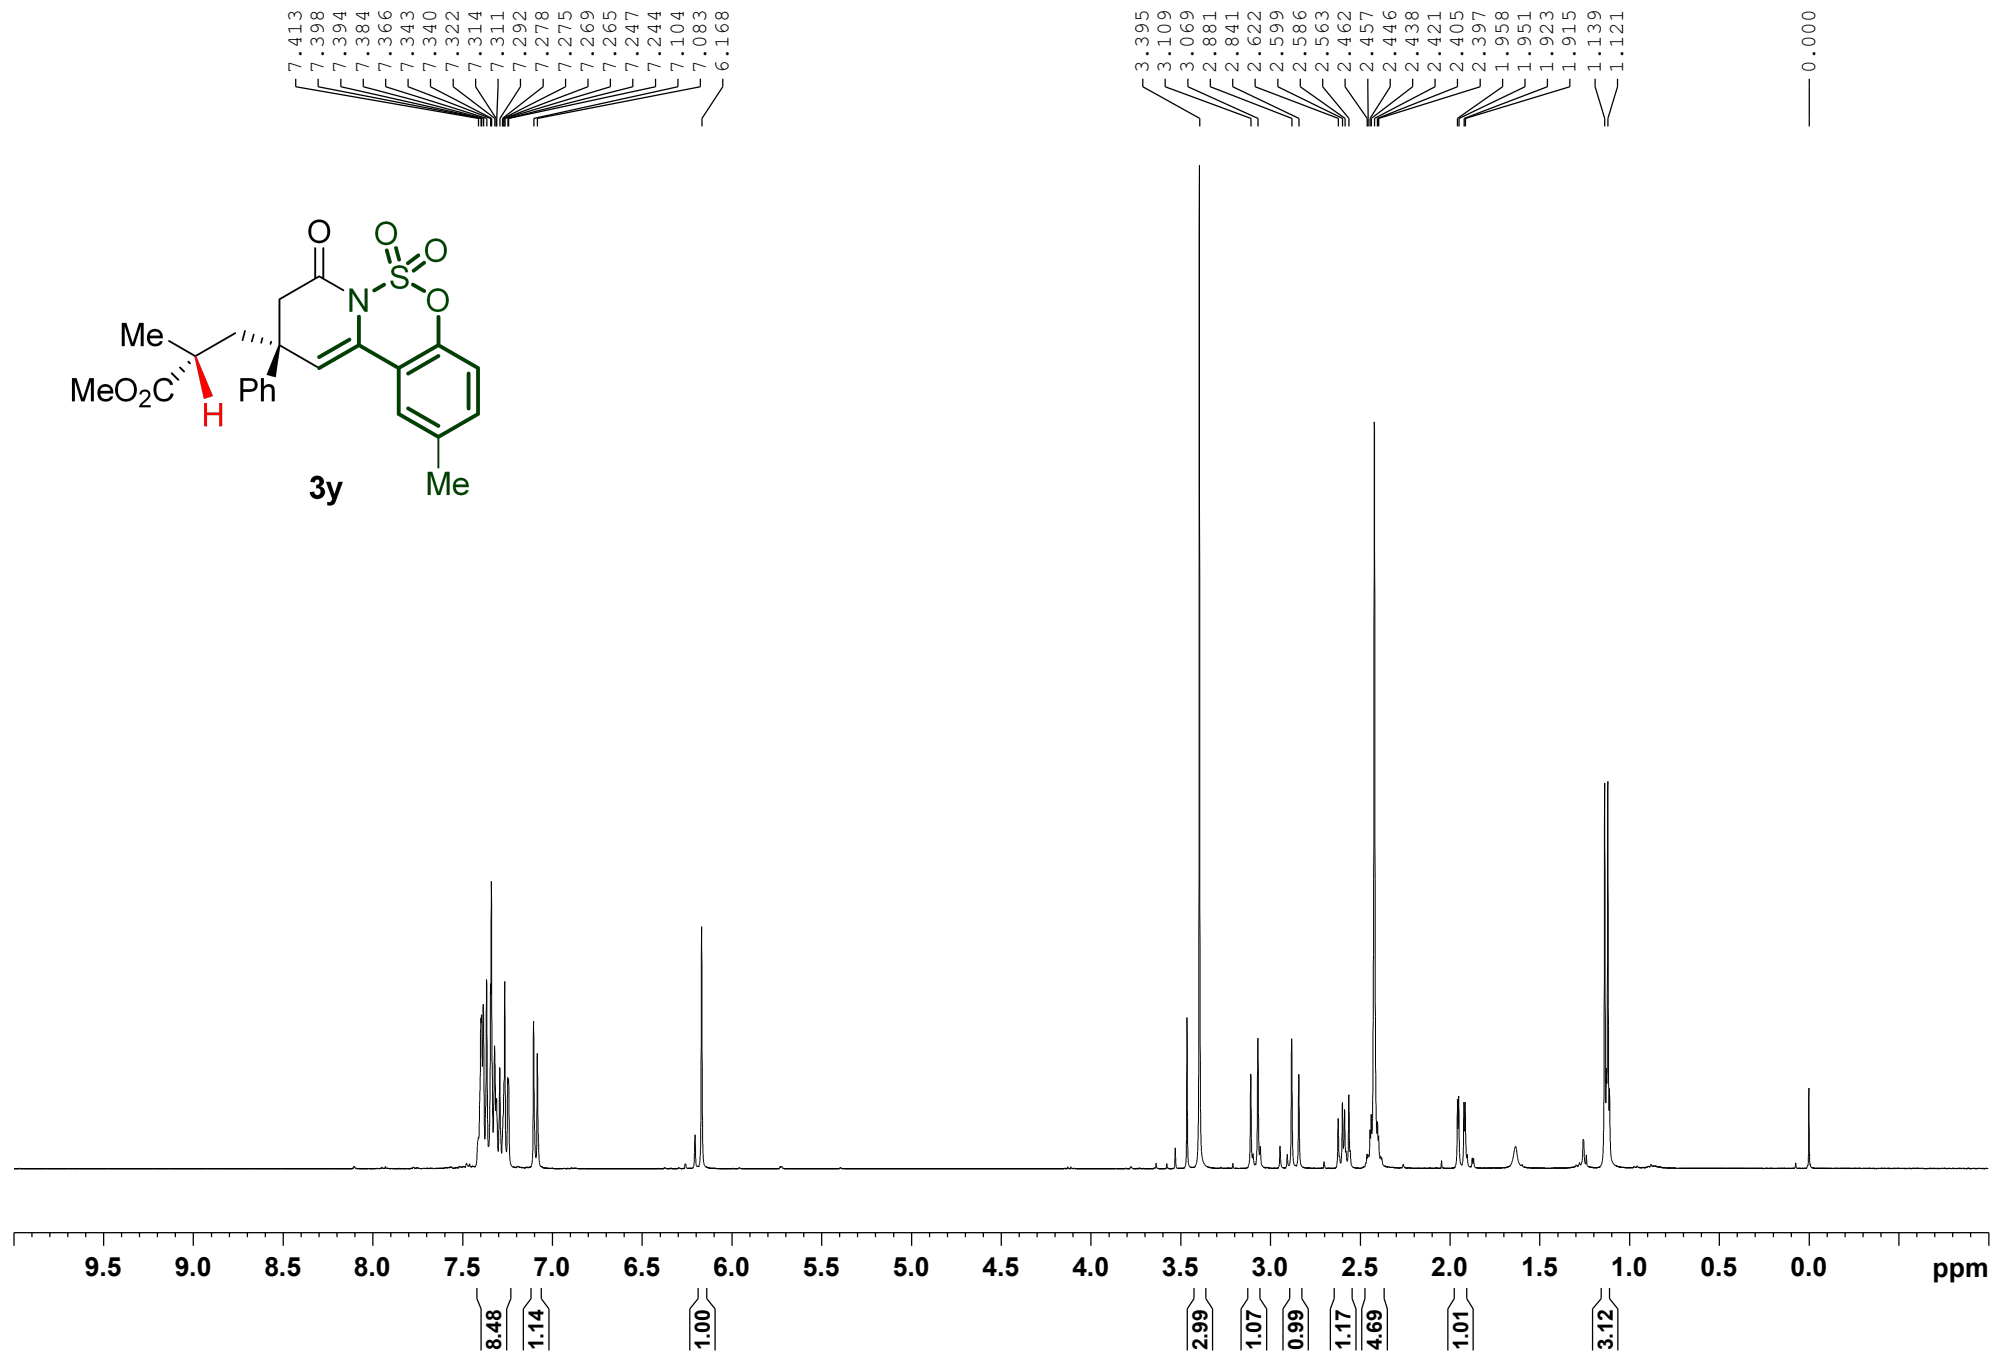

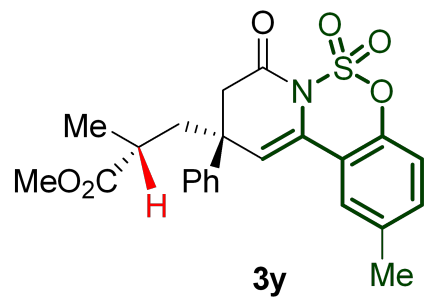

— 176.53

— 166.69

— 145.24

— 141.47

— 137.61

— 132.51

— 132.21

— 129.05

— 127.64

— 126.01

— 125.70

— 119.66

— 119.05

— 114.59

77.32

77.01

76.70

— 51.73

— 44.85

— 43.79

— 42.19

— 36.29

— 21.07

— 19.73

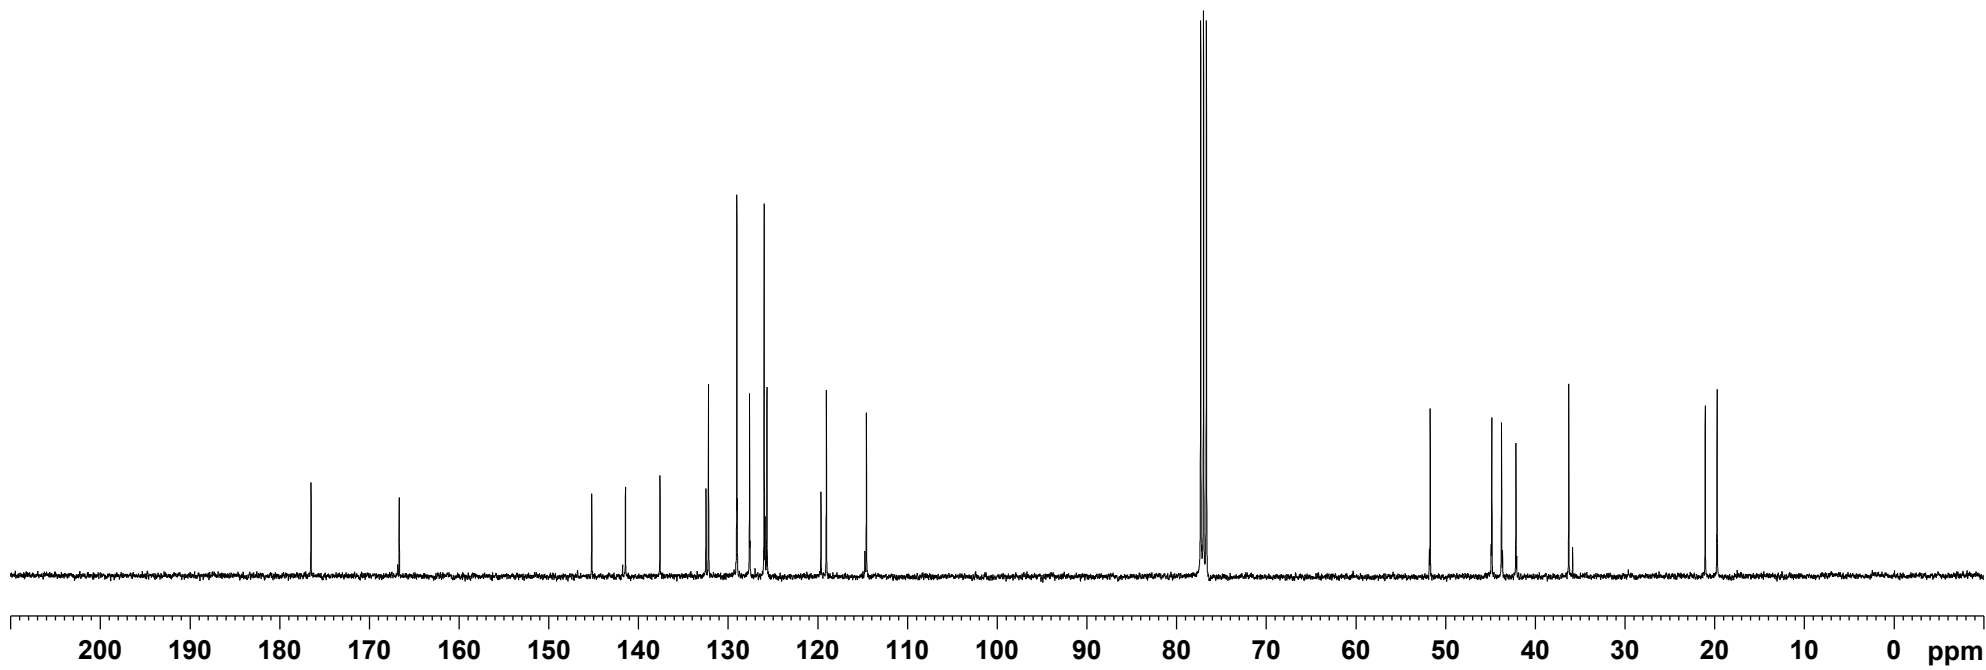

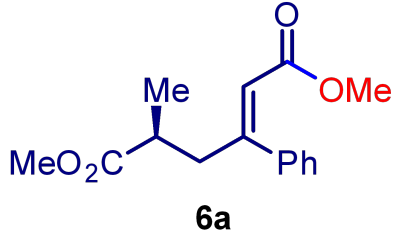

7.416  
7.405  
7.394  
7.391  
7.379  
7.377  
7.367  
7.263

6.085

3.755  
3.550  
3.530  
3.516  
3.497  
3.472  
3.322  
3.305  
3.289  
3.272  
2.608  
2.590  
2.573  
2.555  
2.537  
2.518

1.131  
1.113

0.000

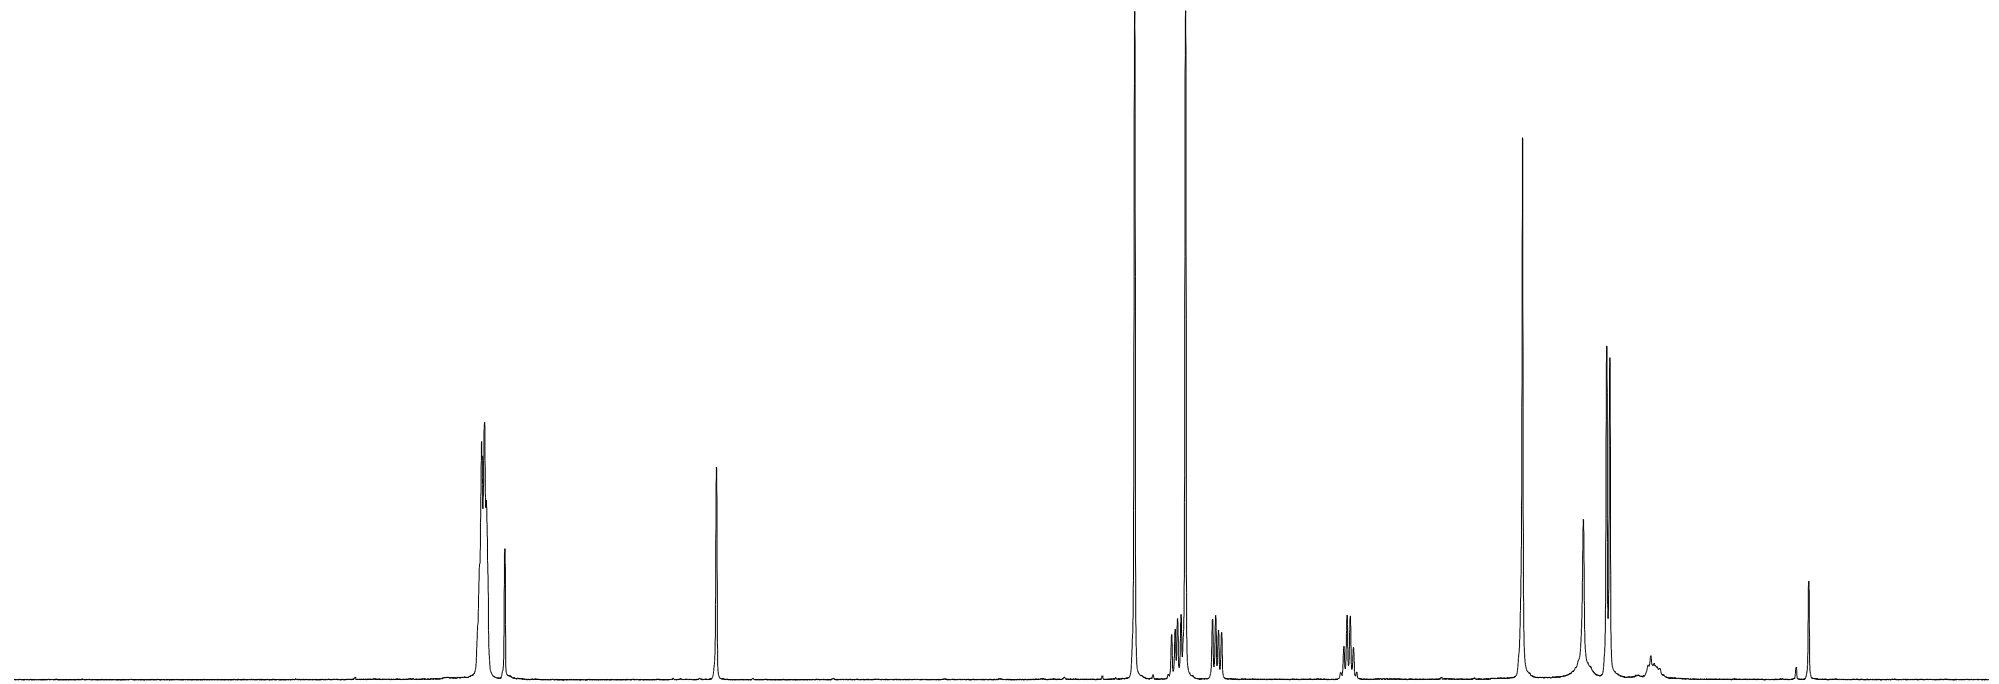

9.5 9.0 8.5 8.0 7.5 7.0 6.5 6.0 5.5 5.0 4.5 4.0 3.5 3.0 2.5 2.0 1.5 1.0 0.5 0.0 ppm

0.55

0.10

0.32

0.42

0.11

0.11

0.32

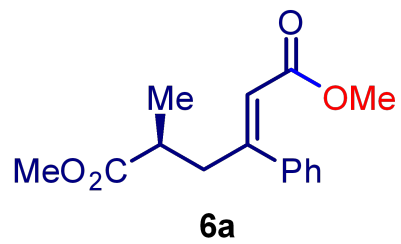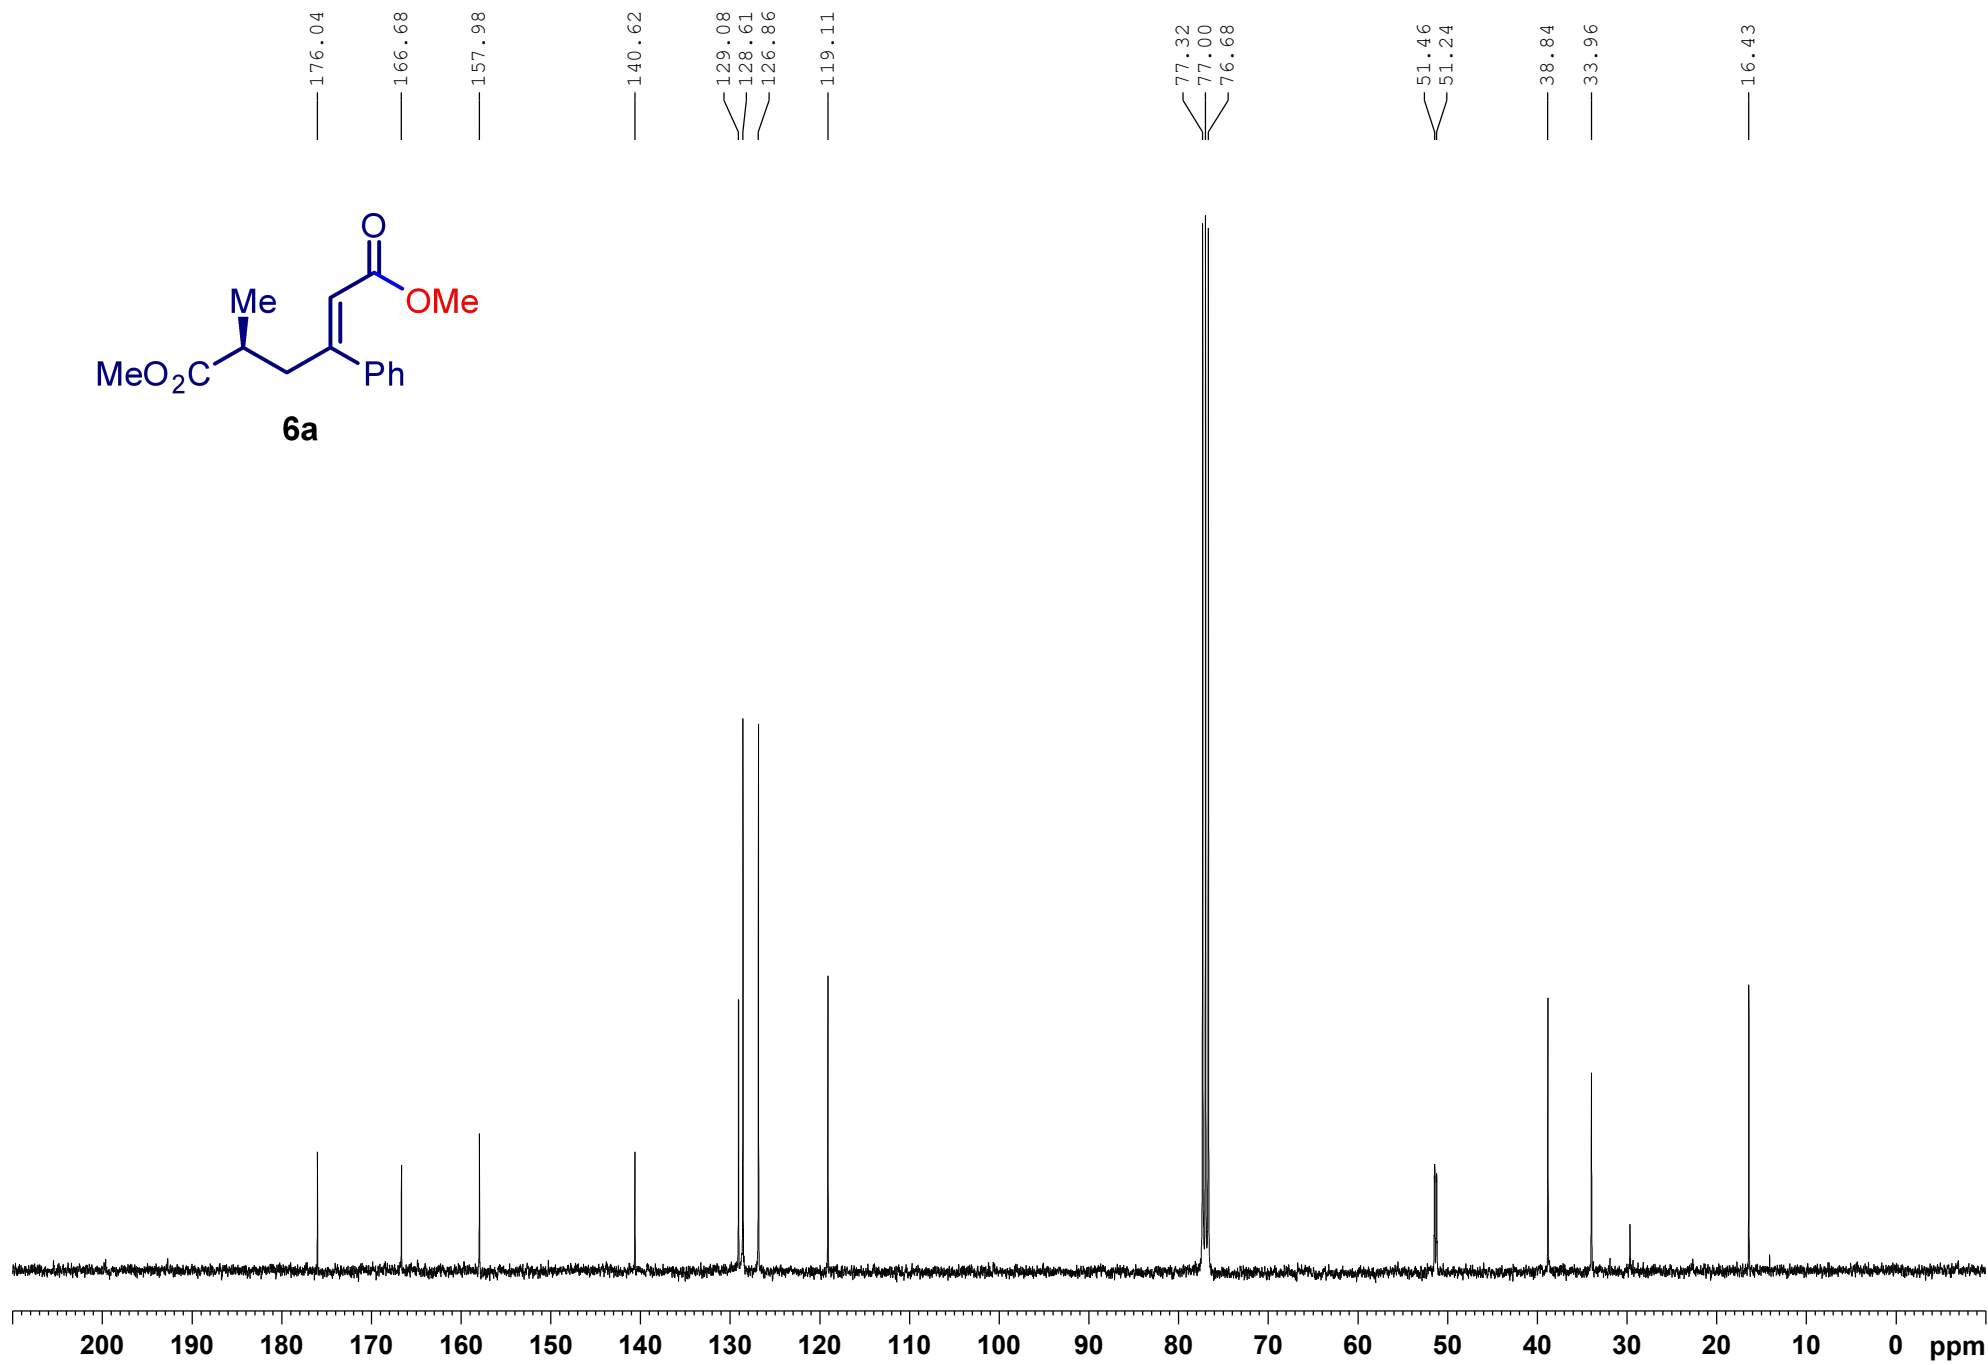



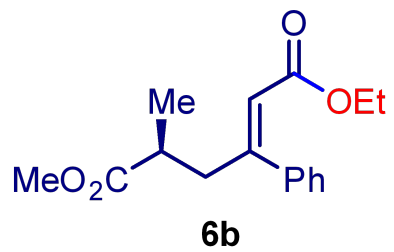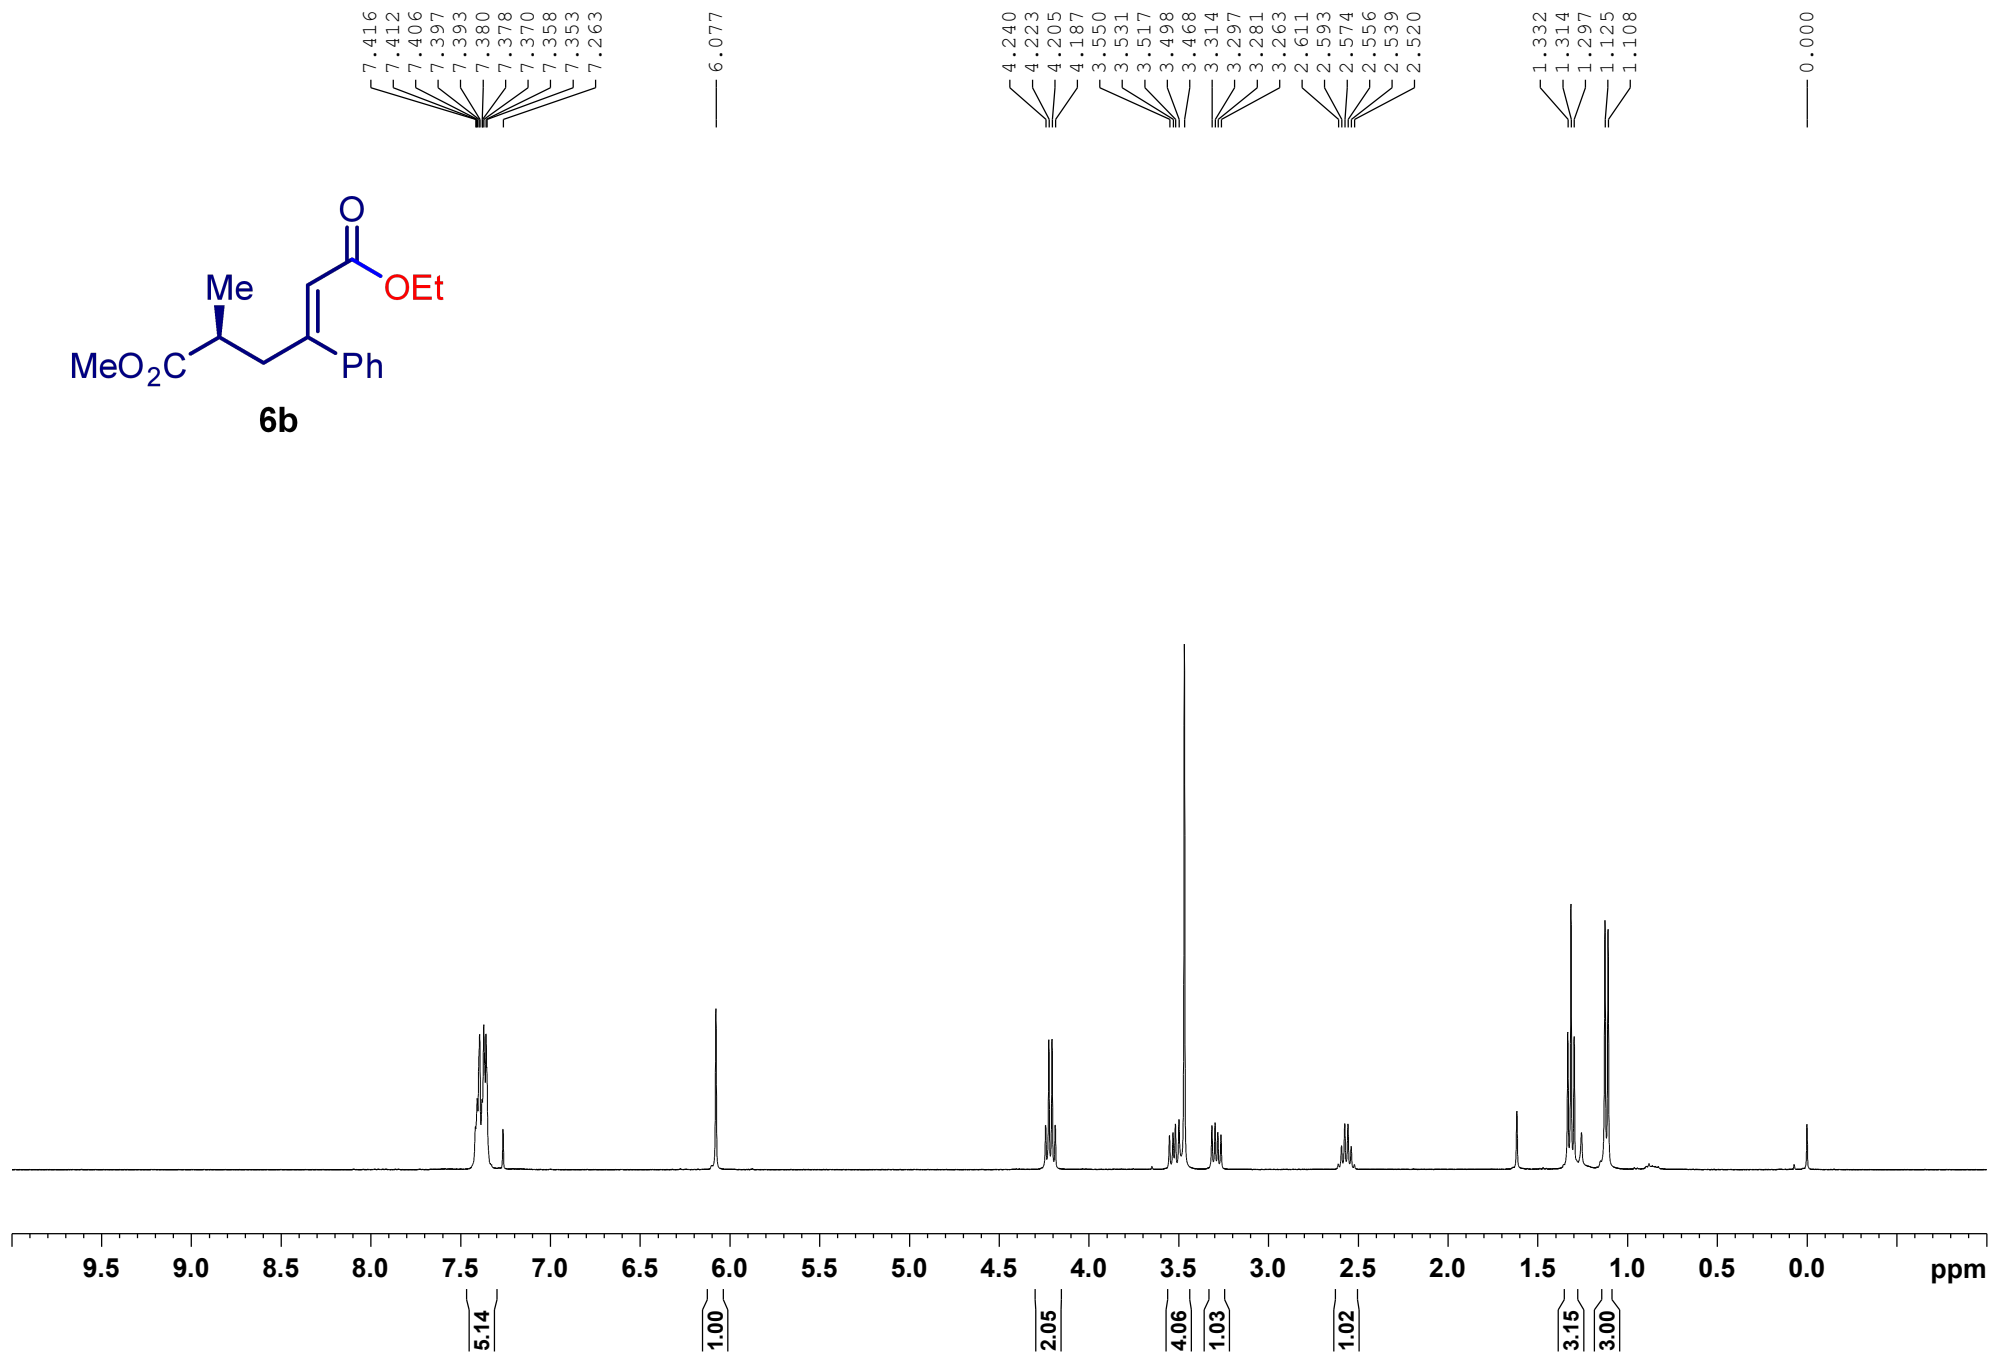

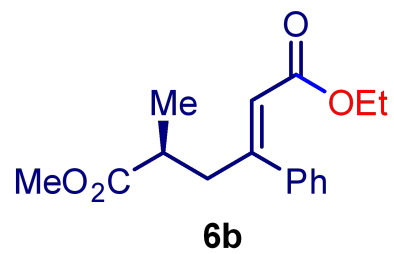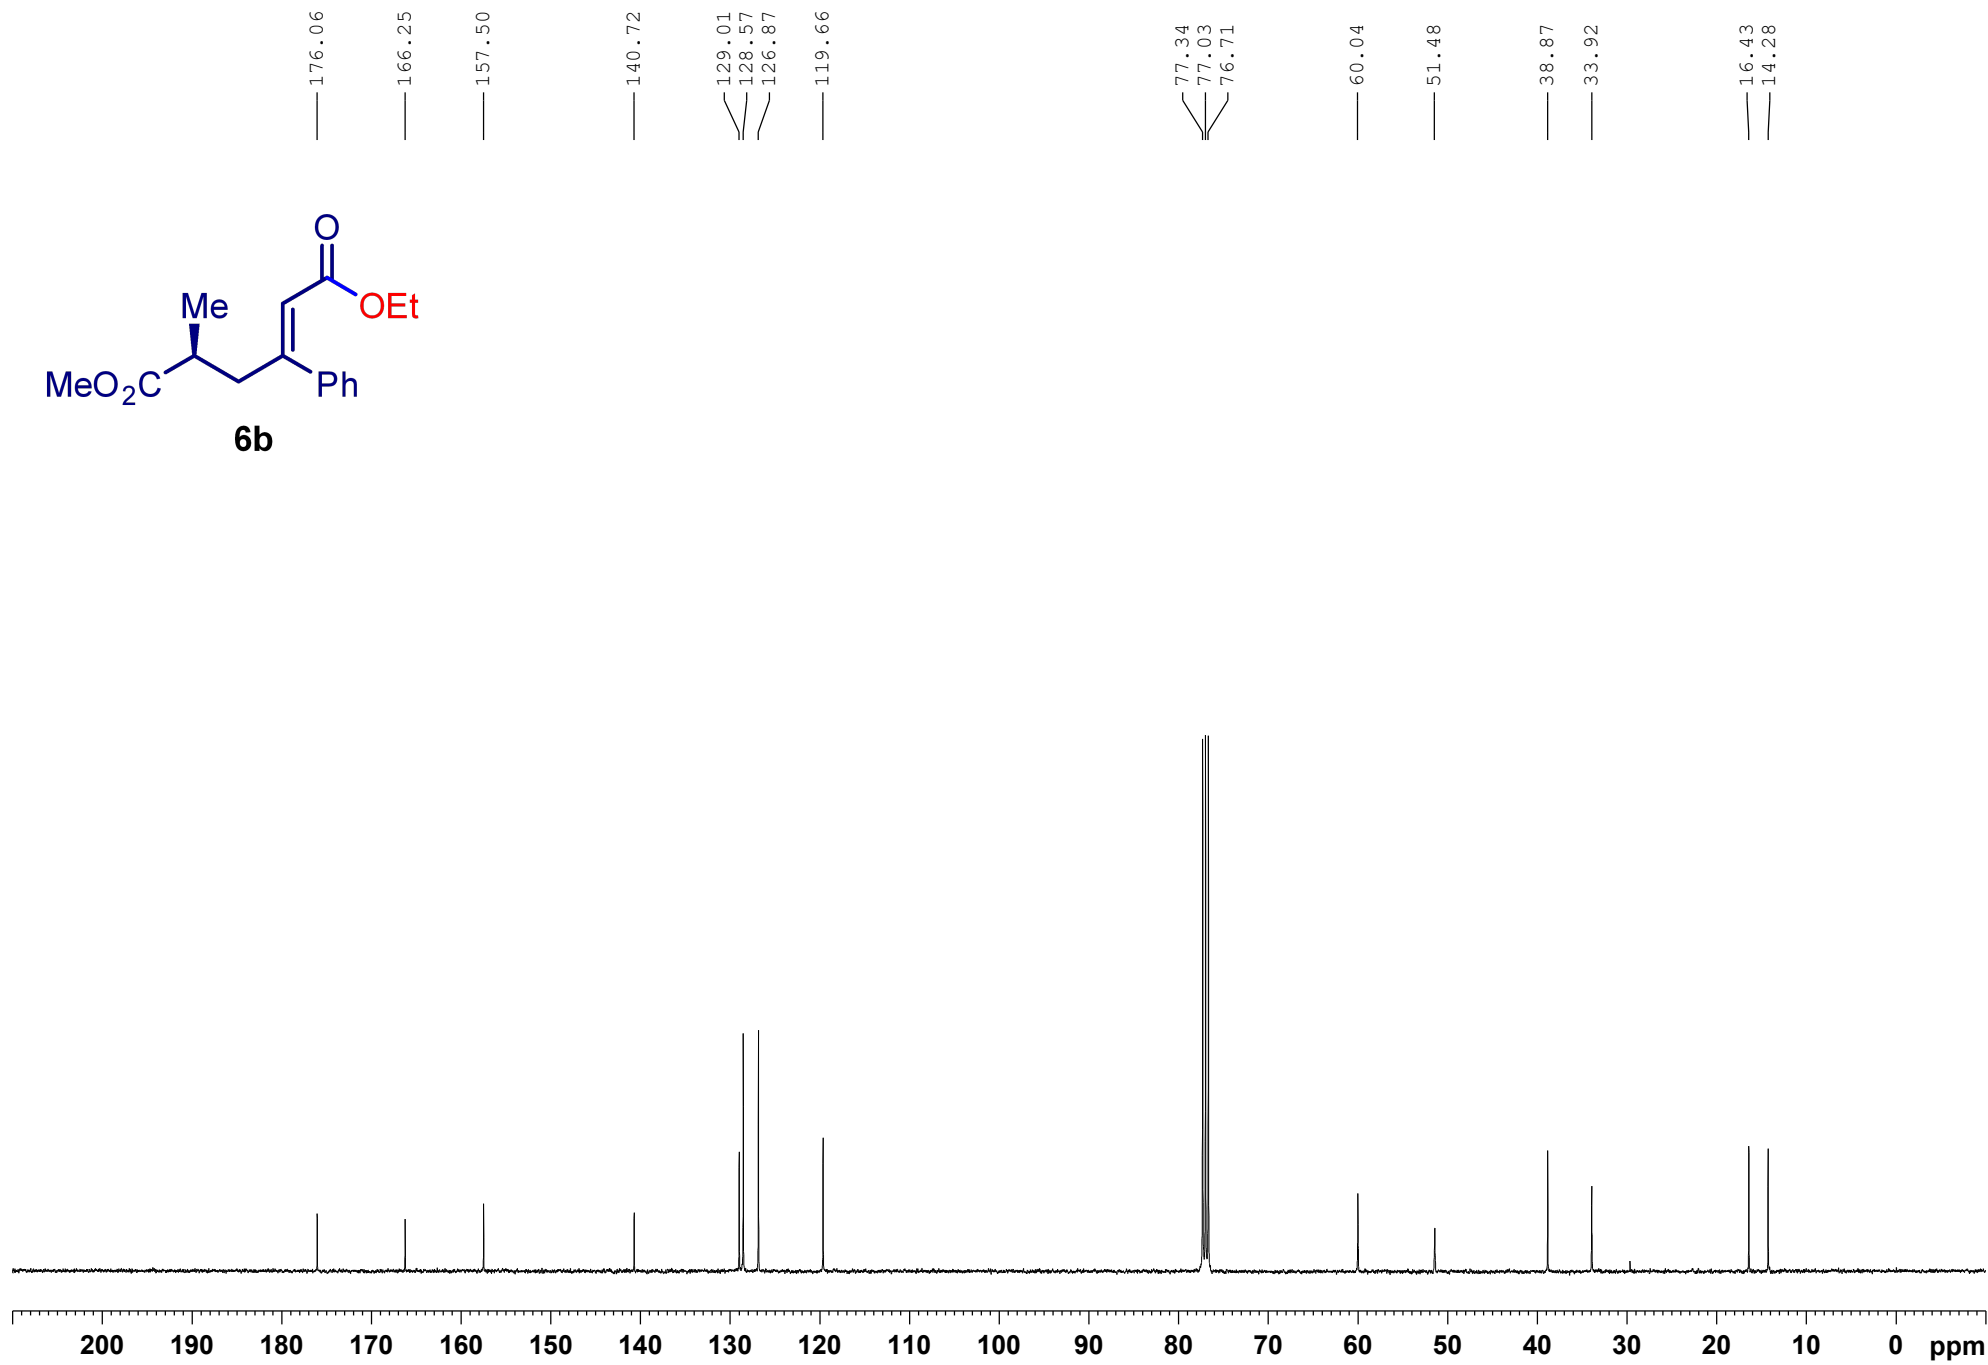

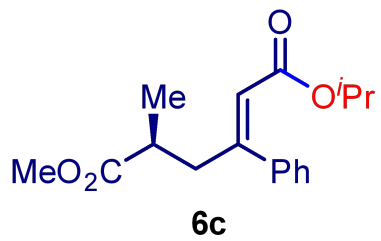

7.417  
7.410  
7.405  
7.397  
7.392  
7.385  
7.376  
7.366  
7.360  
7.352  
7.347  
7.263

6.050

5.140  
5.125  
5.109  
5.094  
5.078  
5.062  
5.046

3.545  
3.525  
3.511  
3.492  
3.468  
3.307  
3.289  
3.274  
3.256  
2.609  
2.591  
2.574  
2.555  
2.537  
2.520

1.305  
1.297  
1.289  
1.281  
1.125  
1.107

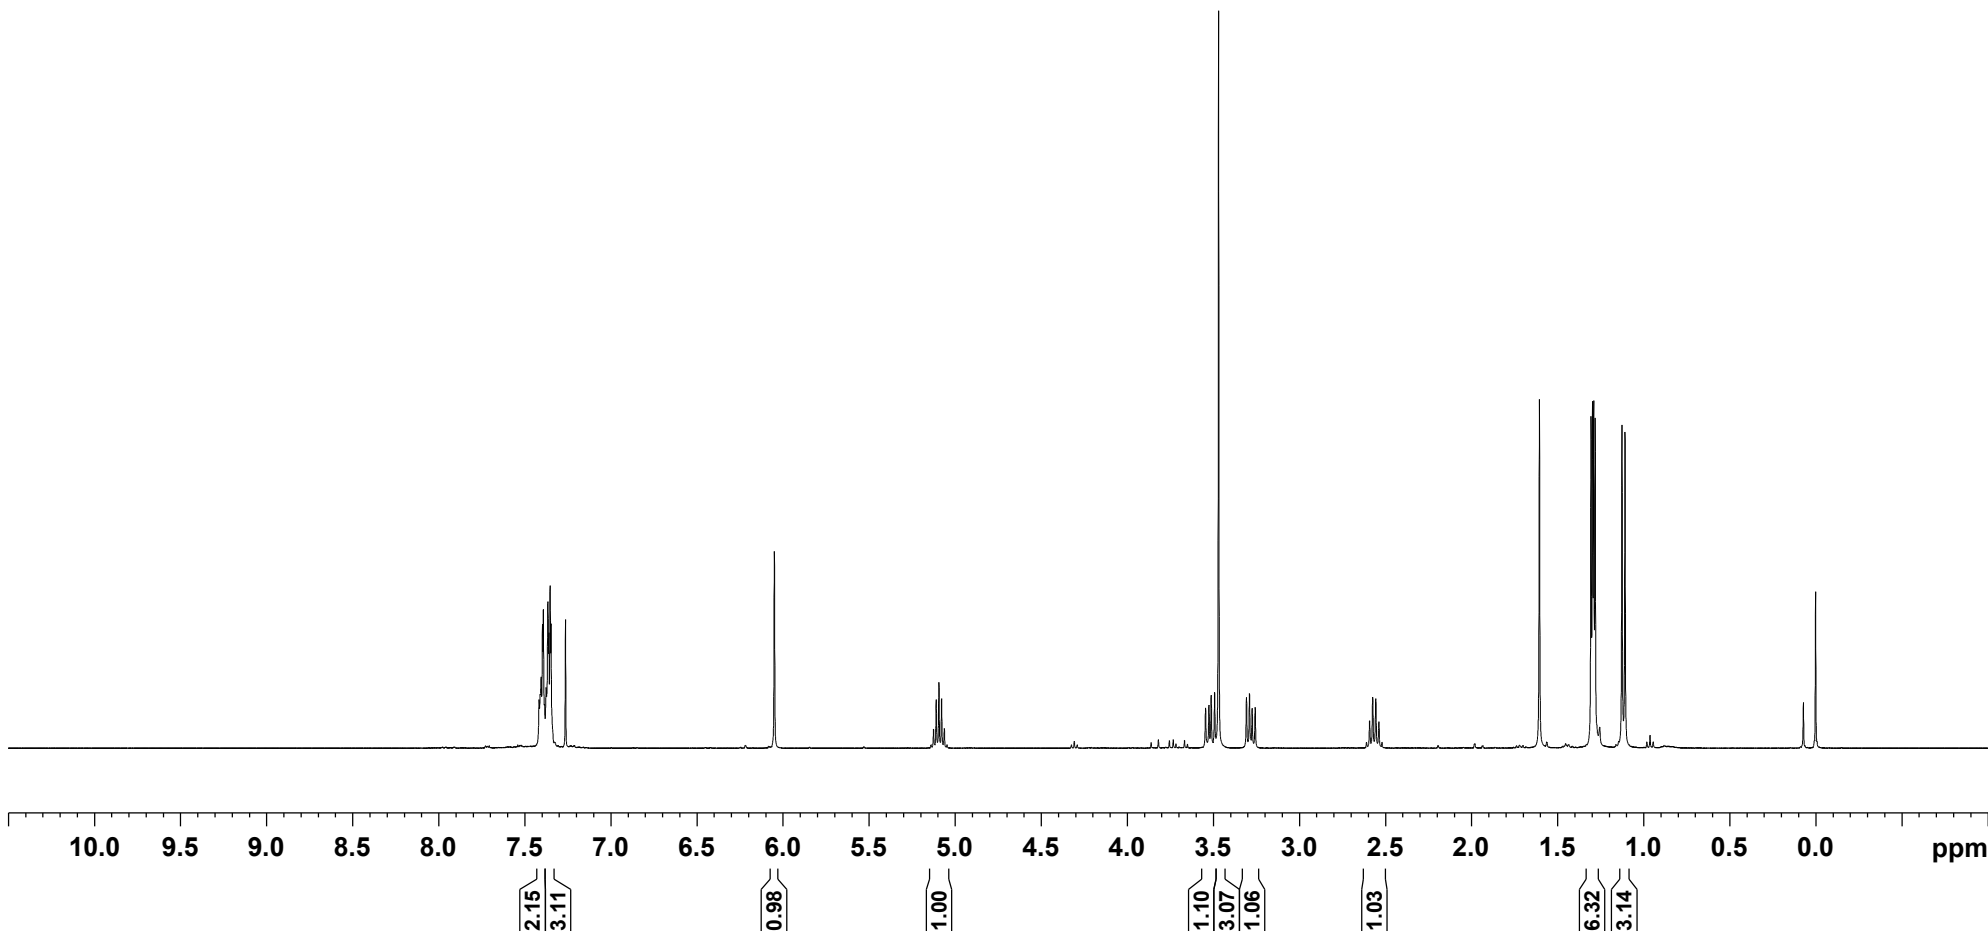

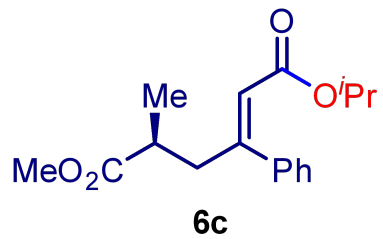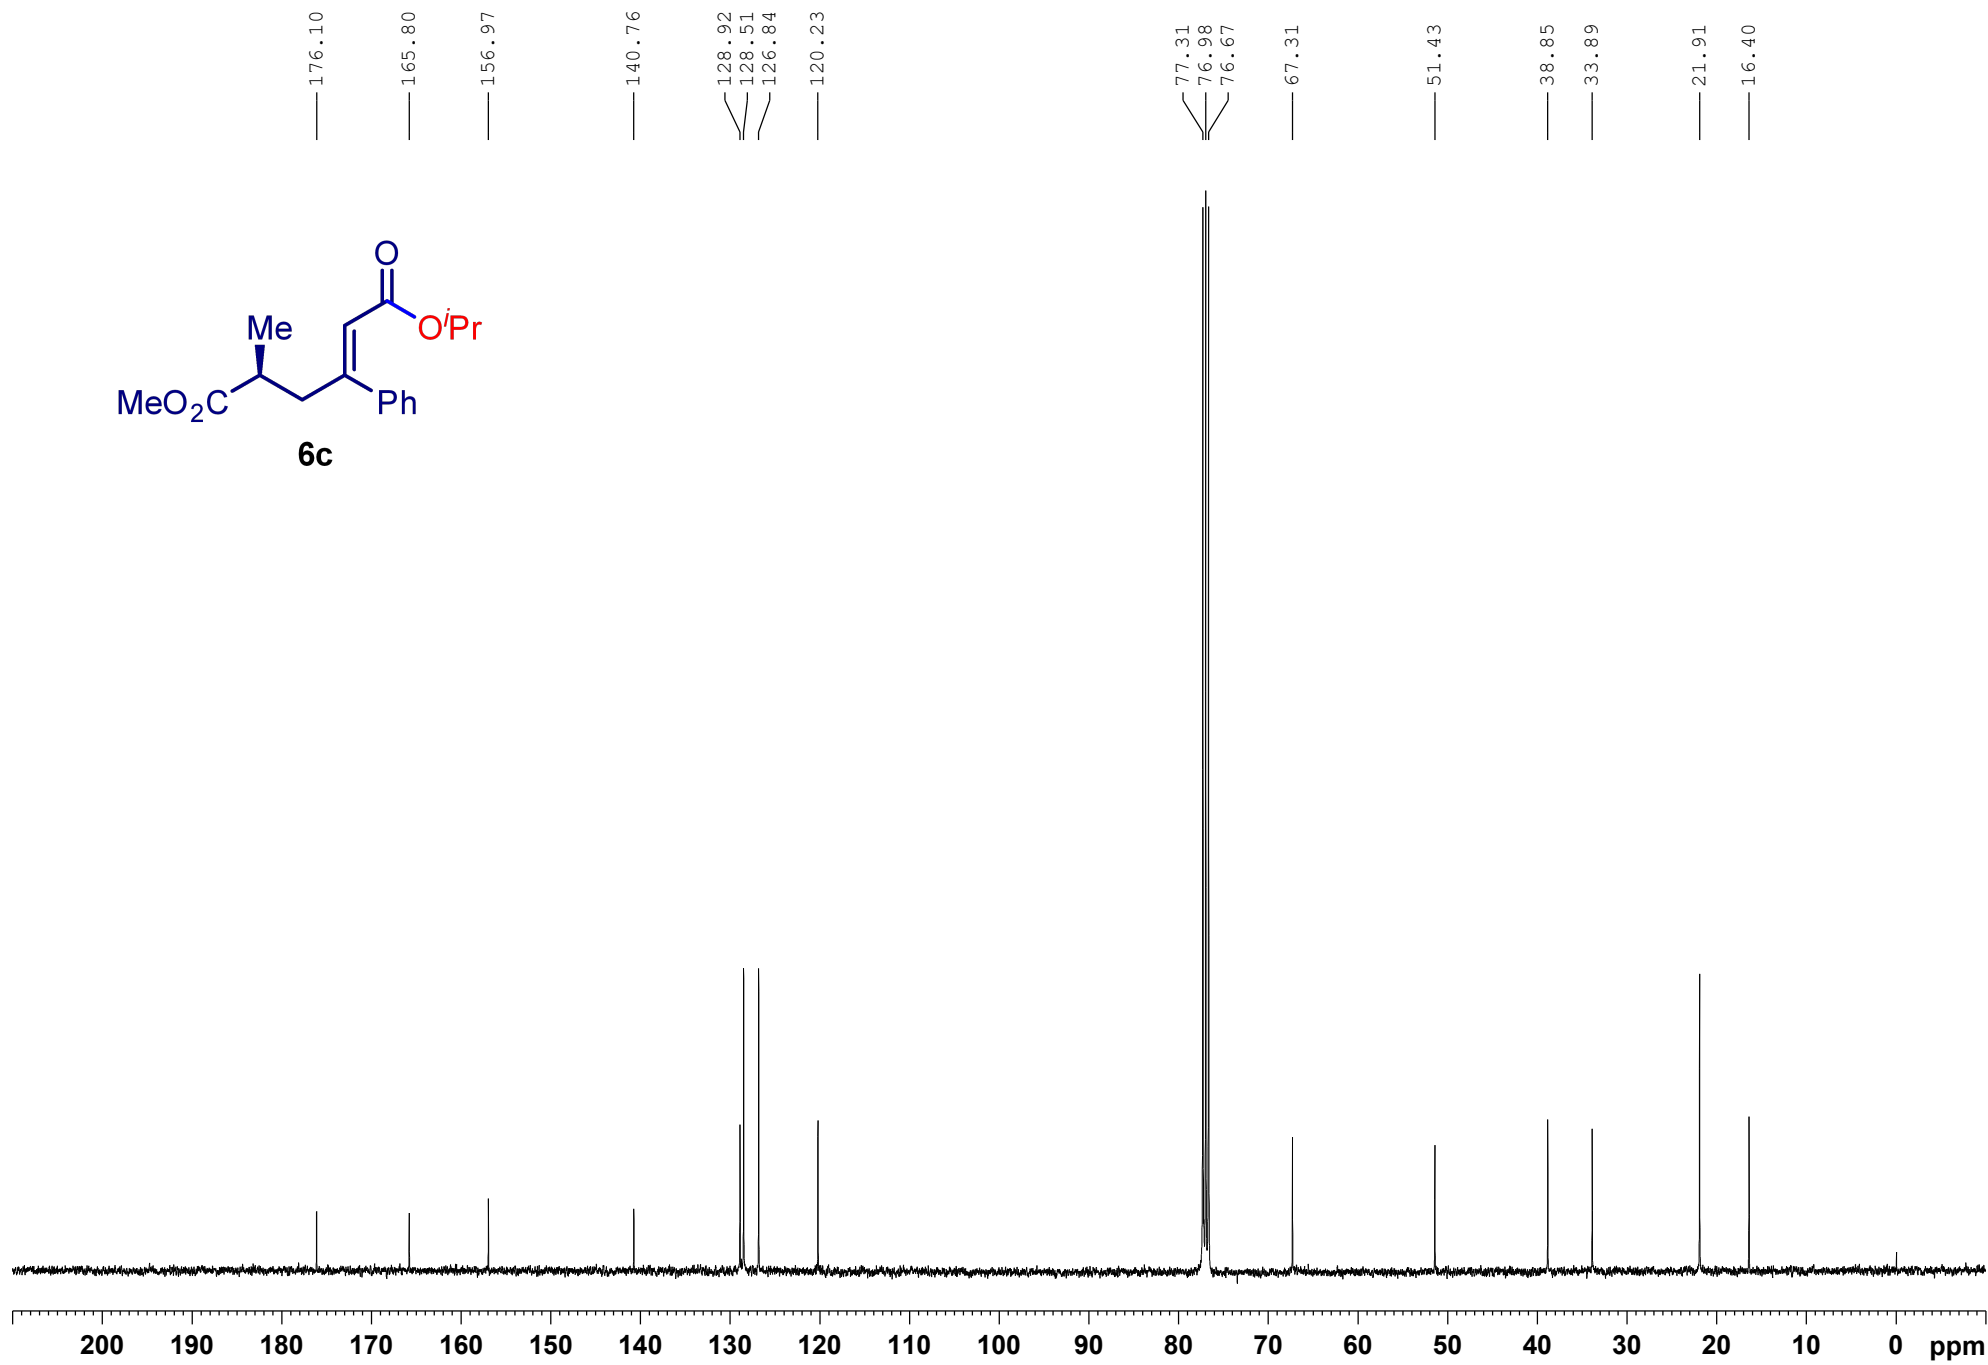

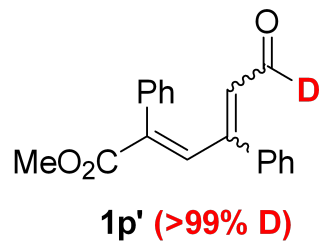

9.802  
9.782

7.854  
7.508  
7.492  
7.487  
7.439  
7.423  
7.403  
7.384  
7.370  
7.259  
7.208  
7.203  
7.194  
7.191  
7.181  
7.116  
7.111  
7.103  
7.091  
6.230

3.871

0.000

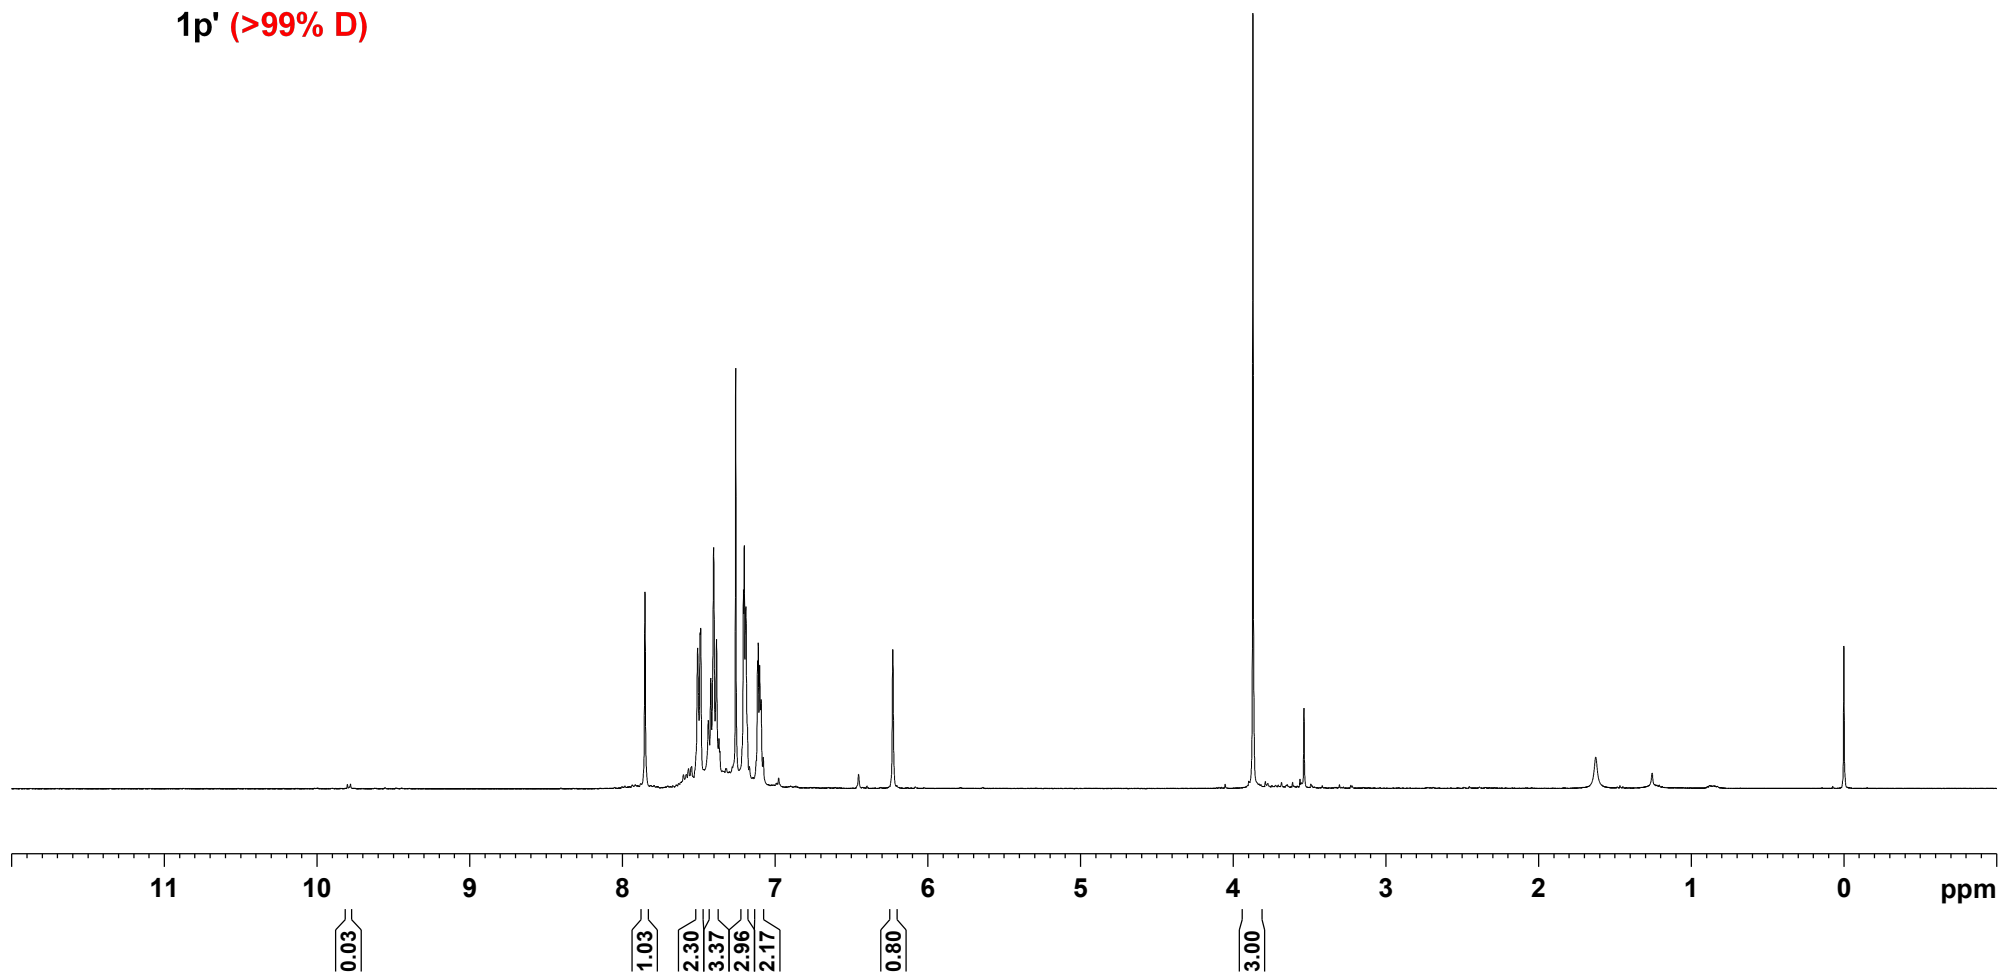

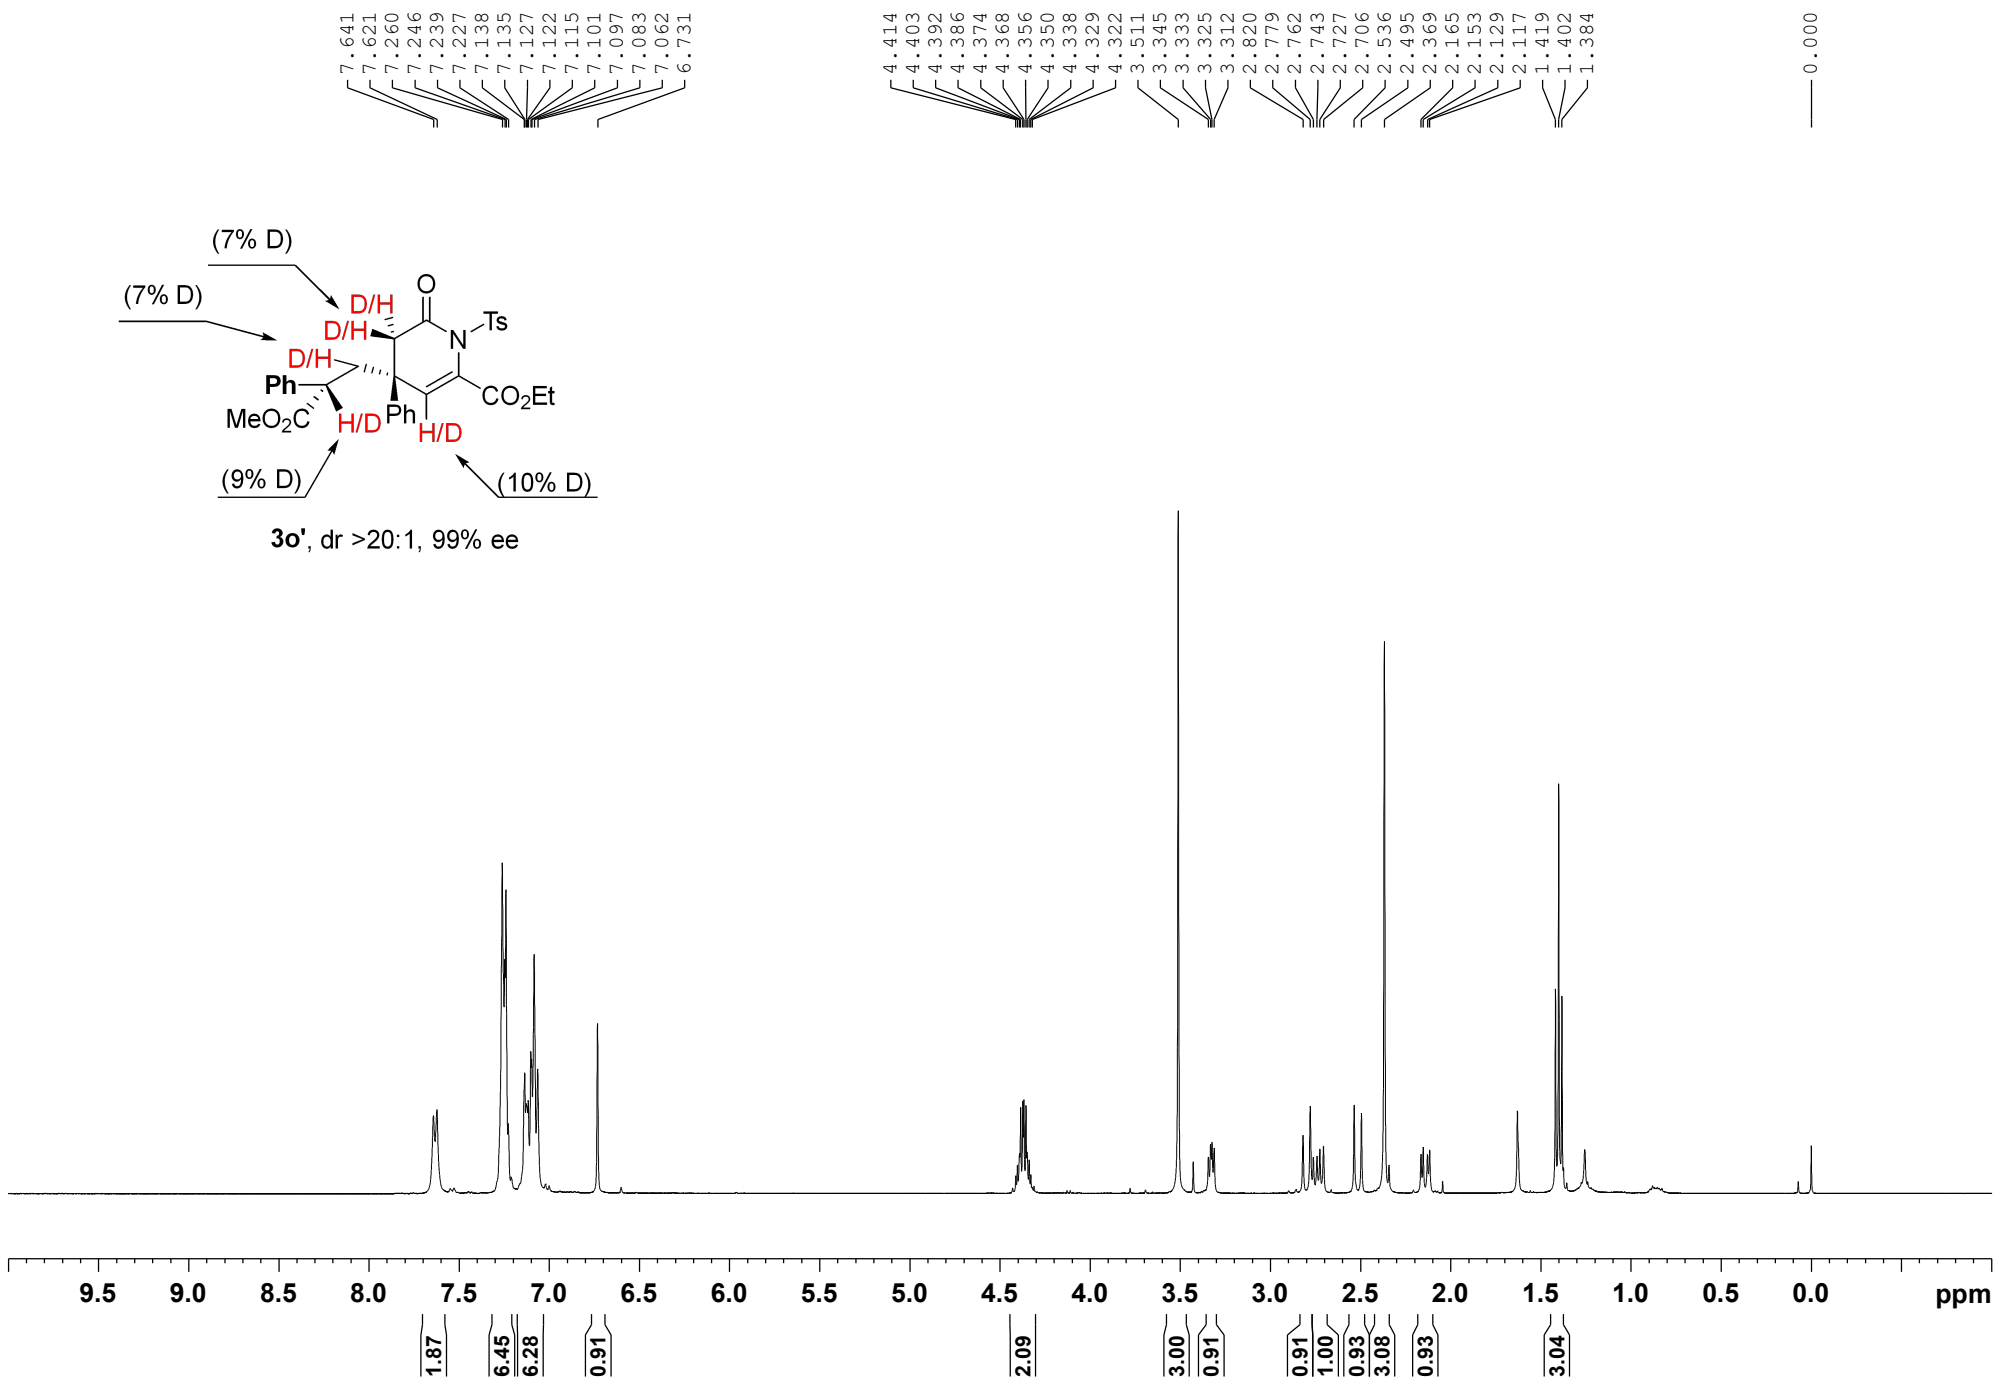

7.724  
7.717  
7.704  
7.264  
7.250  
7.165  
7.158  
7.147  
7.140  
7.113  
6.782

3.920

3.495

2.934

2.889

2.662

2.621

2.380

2.357

2.323

1.685

1.650

0.985

0.000

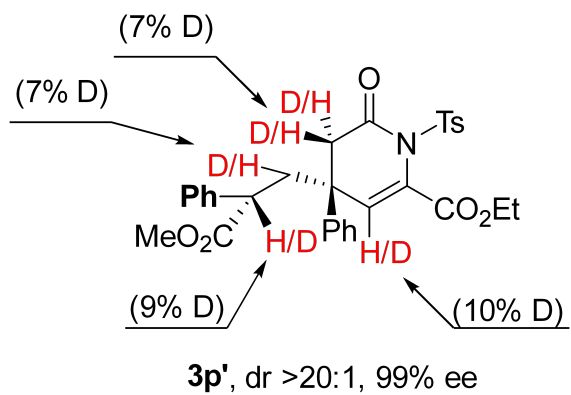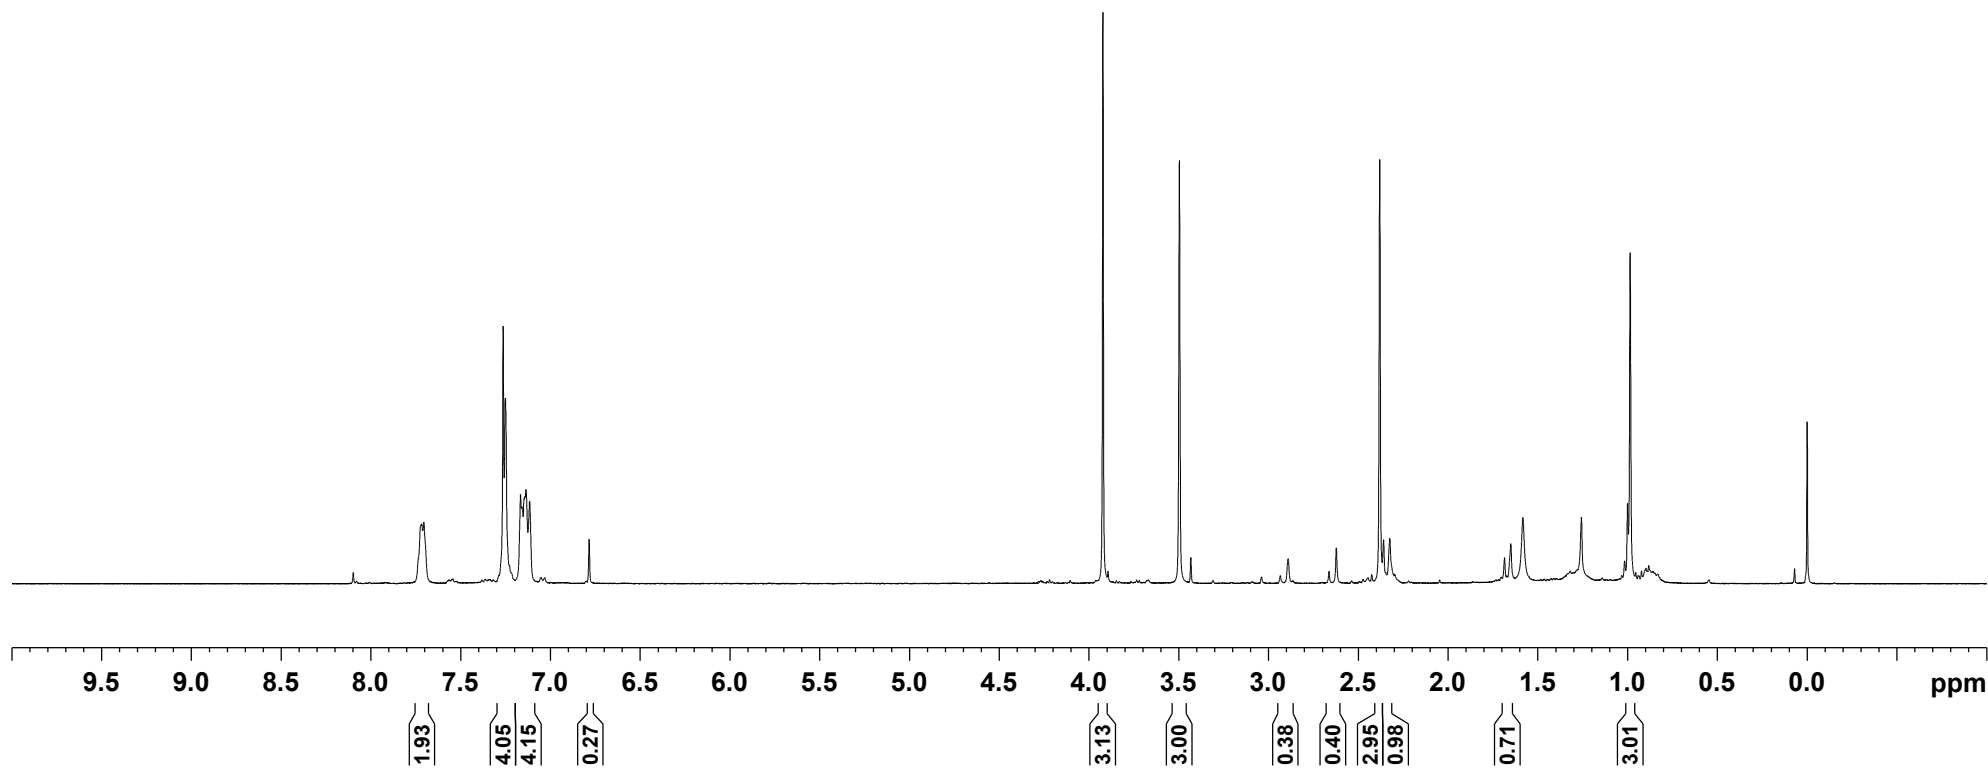

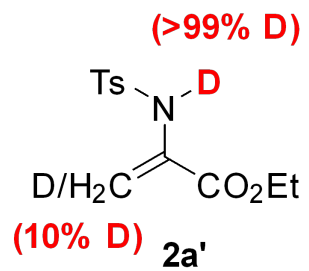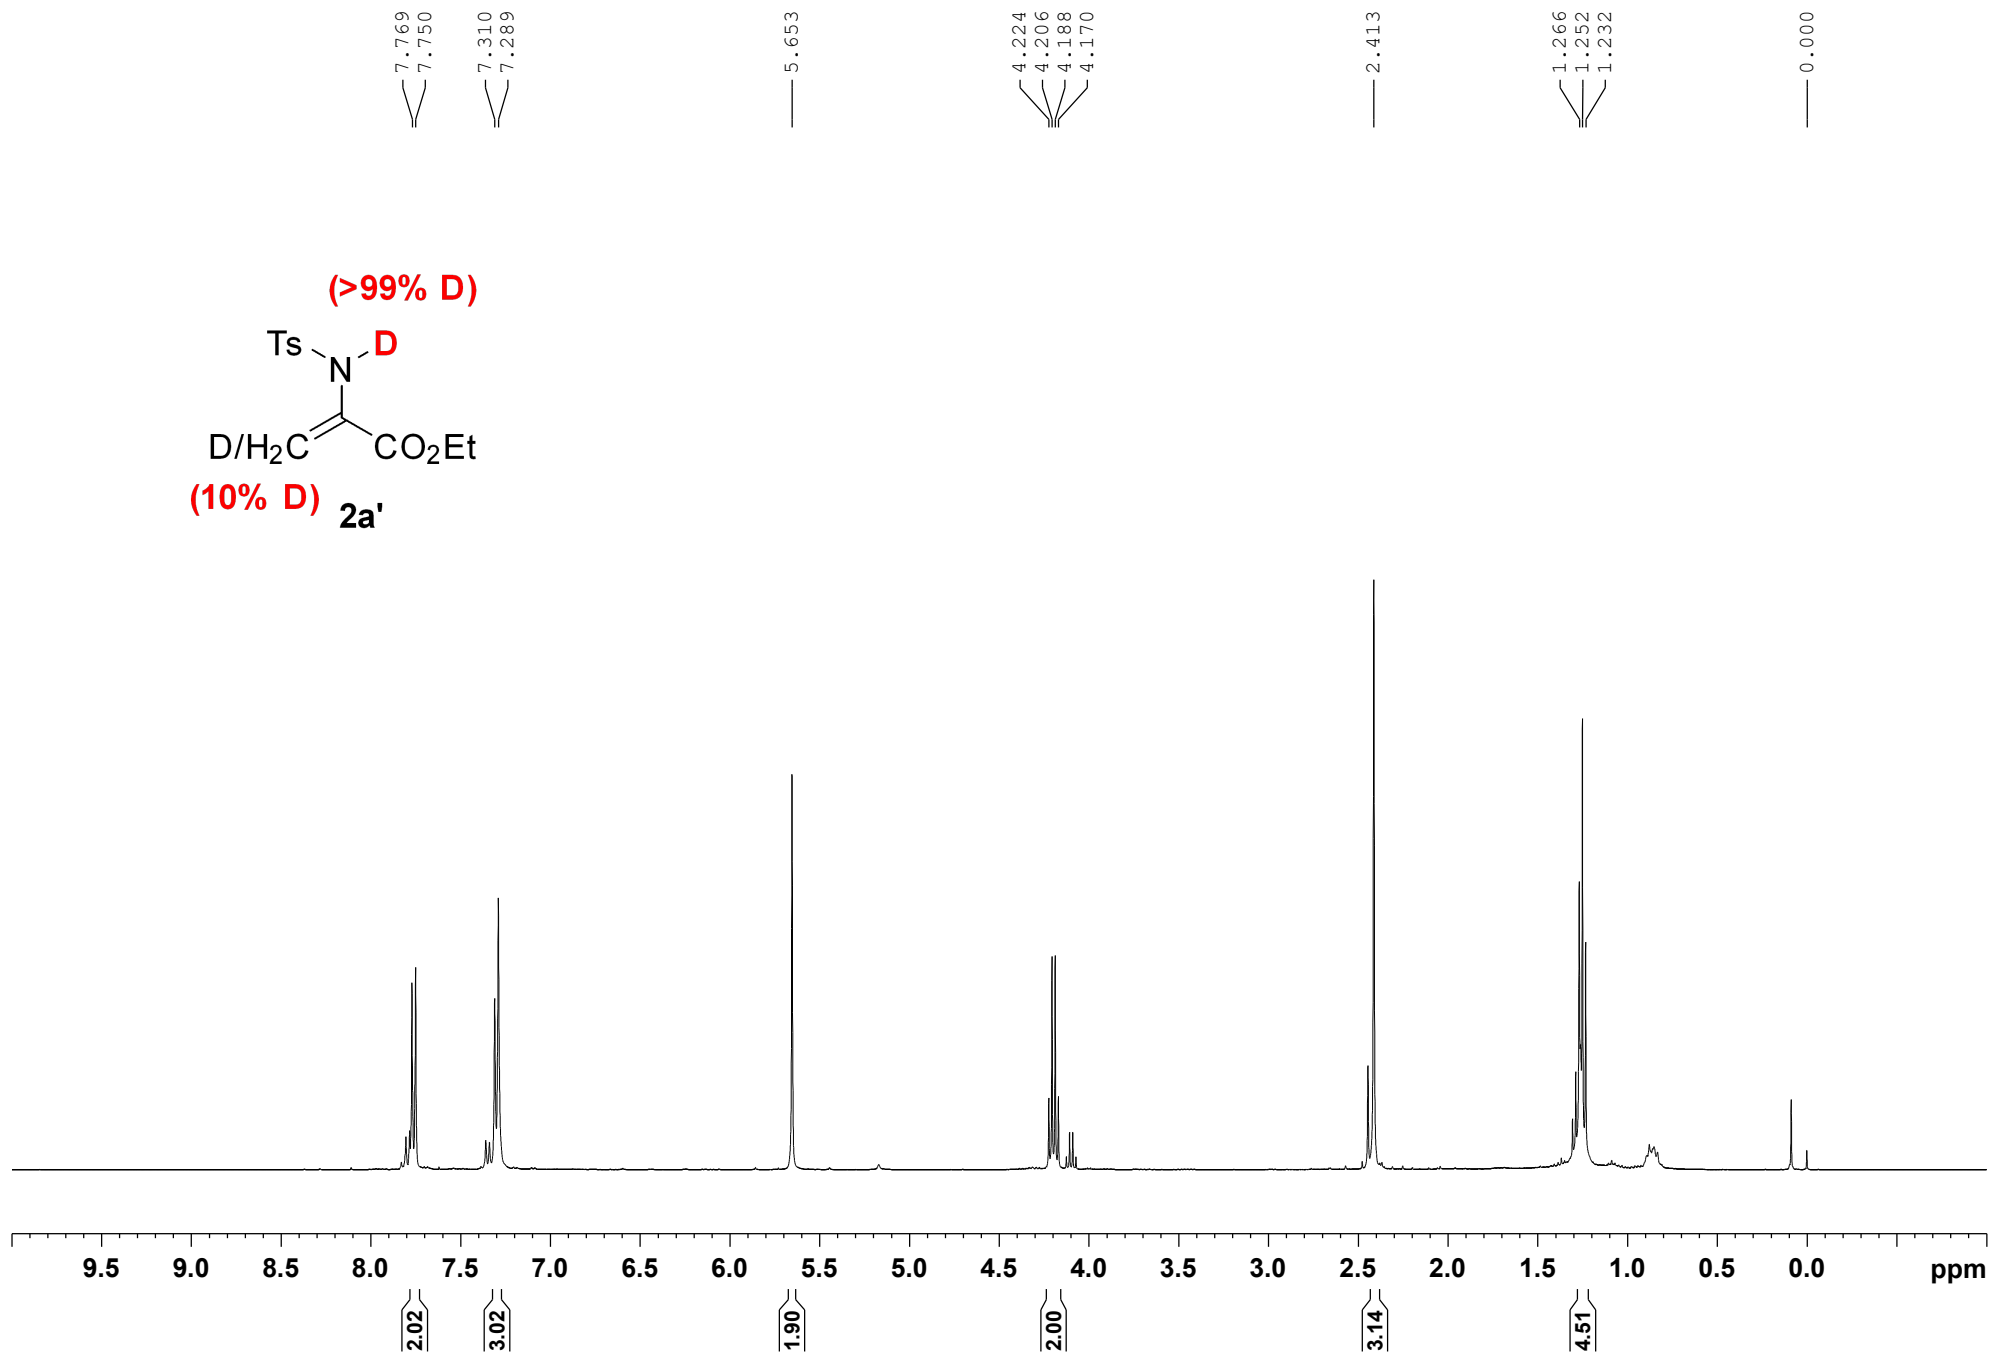



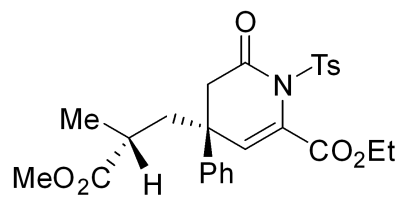

**3a'**

7.700  
7.681  
7.265  
7.255  
7.248  
7.170  
7.160  
7.149  
7.122  
7.101  
6.771

4.447  
4.431  
4.425  
4.414  
4.405  
4.386  
4.368  
4.357  
4.348  
4.339  
4.322

3.499

2.940  
2.899  
2.663  
2.623  
2.375  
2.357  
2.326  
2.317  
2.288

1.685  
1.652  
1.429  
1.409  
1.392  
0.998  
0.981

0.000

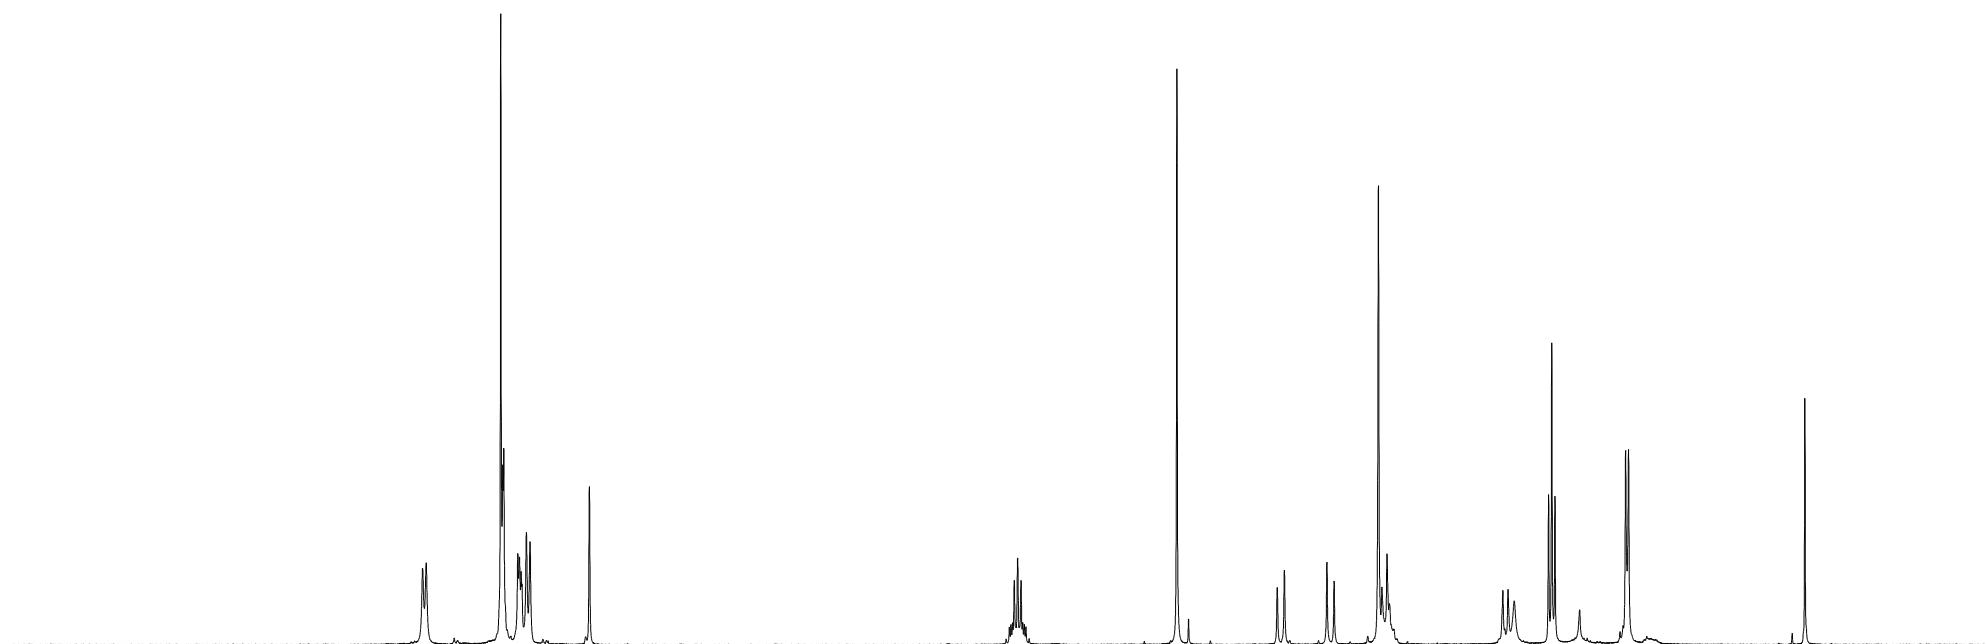

9.5 9.0 8.5 8.0 7.5 7.0 6.5 6.0 5.5 5.0 4.5 4.0 3.5 3.0 2.5 2.0 1.5 1.0 0.5 0.0 ppm

1.91  
3.46  
2.04  
2.03  
0.96

2.11

3.00

1.00

1.00

5.13

1.09

3.19

2.97
